# Supplementary material for: Human cytomegalovirus interactome analysis identifies degradation hubs, domain associations and viral protein functions
Source: eLife. 2019 Dec 24;8:e49894. doi: 10.7554/eLife.49894 (PMC6959991; doi:10.7554/eLife.49894)
Supplement: Figure 1—figure supplement 1—source data 1. [file elife-49894-fig1-figsupp1-data1.xlsx]

## Sheet: Figure 1 – Figure Supplement 1C
	Replicate 1			Replicate 2
Gene	Total peptides	Unique peptides	Bait peptides	Total peptides	Unique peptides	Bait peptides
GAW	10915	7483	-	10380	7334	-
GAW1	12805	8632	-	13753	9327	-
GAW2	13198	8660	-	13711	9455	-
GFP1	11164	7162	-	11441	7787	-
GFP2	10655	7149	-	10728	7353	-
IRS1	6514	4078	646	6705	4059	632
ORFL147C	21223	14295	29	20705	13564	32
ORFS343C	16659	11000	NQ	17222	11206	NQ
RL1	12921	9646	41	12639	9649	26
RL10	2065	1364	NQ	1906	1145	NQ
RL11	8428	6025	19	6708	4522	13
RL12	10020	7691	6	10550	7841	6
RL13	9171	6756	13	7211	5797	13
RL5A	7582	5628	1	8702	6638	1
RL6	19889	14131	1	19258	13234	2
RL8A	19628	14097	12	19202	13595	13
RL9A	10066	6856	NQ	8642	6362	NQ
TRS1	8590	5844	86	7260	5149	66
UL1	8539	6549	NQ	7768	5951	NQ
UL10	8464	5819	71	8506	5602	92
UL100	11376	8410	53	12030	9449	40
UL102	7507	4977	476	6941	4735	449
UL103	8351	6322	17	7134	5311	14
UL104	4173	2998	38	3709	2666	27
UL105	18012	12294	475	17295	11719	506
UL11	12696	9262	40	12828	9009	38
UL111A	8753	6030	128	7618	4616	144
UL112	11542	8194	39	11710	8115	33
UL114	7675	5185	164	7273	5058	145
UL115	4529	3401	17	4786	3445	18
UL116	10100	7187	22	8177	5259	12
UL117	10630	7430	58	10281	7167	55
UL119	8607	6303	17	5331	4220	9
UL120	2575	2122	NQ	2093	1641	NQ
UL121	10952	8468	7	10504	7908	4
UL122	16449	10523	323	15810	10357	278
UL123	11408	7960	557	12326	8385	529
UL124	4697	2949	16	3812	2478	NQ
UL128	12009	8015	8	12216	7999	2
UL13	13992	10390	16	13301	10023	16
UL130	16184	11549	32	16112	11469	32
UL131A	15807	8756	17	14403	10280	7
UL132	19472	13201	387	17830	12292	317
UL133	1709	518	NQ	1618	500	NQ
UL133	12565	8786	NQ	9040	6920	NQ
UL135	20181	14404	21	19367	14126	19
UL138	6516	4639	NQ	8034	5742	NQ
UL139	11585	8498	29	4628	3589	28
UL14	17402	10990	33	15664	10578	33
UL140	17882	12656	145	17932	12646	119
UL141	11055	8196	65	10809	8117	76
UL142	5004	3888	NQ	3832	2987	NQ
UL144	10863	6850	2	9079	6439	0
UL145	8674	6049	10	5995	4434	6
UL146	5267	4136	NQ	3926	3174	NQ
UL147	17365	11437	9	11072	7483	7
UL147A	15189	11057	NQ	5044	4018	NQ
UL148	8536	6615	14	9068	6460	15
UL148A	12068	8628	1	13302	9287	NQ
UL148B	11894	8900	13	4785	3673	5
UL148C	16601	11523	NQ	16008	11898	NQ
UL148D	7349	5530	NQ	5019	4005	NQ
UL150	16730	11226	104	15420	10575	100
UL150A	17930	12701	NQ	17428	11893	NQ
UL15A	6517	4884	3	11248	7656	5
UL16	10431	7856	29	5879	4482	29
UL17	11488	8726	16	13012	9092	18
UL18	15266	10864	10	13809	10135	7
UL19	17219	11209	103	16327	10263	122
UL2	10240	8166	NQ	9755	7793	NQ
UL20	18863	13078	249	18027	12479	233
UL21A	11017	8768	NQ	12816	9381	2
UL22A	14677	11466	10	13922	10838	10
UL23	5138	3795	5	4675	3622	4
UL24	5409	4006	23	7411	5326	33
UL25	8448	6616	166	1677	1312	59
UL26	15948	11062	156	15439	10838	167
UL27	20578	13010	86	20980	14054	82
UL29	9681	6590	65	7152	5300	45
UL30	17507	13087	2	17635	12829	1
UL30A	12503	8963	11	11832	8472	11
UL31	9583	6359	177	6972	4985	125
UL32	15432	11187	292	16024	11063	307
UL33	16345	10825	2	14476	10702	2
UL34	4314	2908	69	4516	2902	83
UL35	6197	4283	181	5622	4034	167
UL36	10862	7568	117	7256	5091	114
UL37	18007	13209	14	17372	12574	13
UL38	12056	6965	90	8281	5490	60
UL4	8790	6985	2	9609	7446	4
UL40	12702	9383	7	13573	9552	22
UL41A	4018	3090	2	4206	3282	2
UL42	3249	2322	NQ	3458	2337	NQ
UL43	6571	3753	320	4013	2142	292
UL44	14361	10064	313	12905	9080	285
UL45	6972	5166	111	6968	5433	90
UL46	7767	5637	24	6940	5005	13
UL47	21069	14190	377	19554	12908	396
UL48	5617	4025	9	6549	4411	14
UL48A	5490	3803	NQ	5314	4085	NQ
UL49	6788	4676	6	6034	4224	7
UL5	4889	3708	9	5821	4378	8
UL50	15537	10490	50	14575	9730	52
UL51	16794	12167	11	16732	12012	12
UL52	13315	9177	242	9867	7567	126
UL53	8267	4848	175	4002	2456	55
UL54	7995	5267	306	8067	5501	312
UL55	16225	11052	415	16216	10425	464
UL56	17101	11745	133	16870	11026	170
UL57	9055	6121	923	8631	5657	879
UL6	3980	2684	NQ	4017	2792	NQ
UL69	6756	4757	75	5318	3872	59
UL7	5254	3682	5	4824	3062	6
UL70	11509	5998	185	11196	6094	181
UL71	11950	7057	935	8239	4671	986
UL72	14038	9460	45	13956	9999	46
UL73	10789	7576	NQ	9873	5648	NQ
UL74	13224	8805	139	11156	7698	181
UL74A	4825	3672	NQ	4760	3723	NQ
UL75	13101	8556	118	9680	7038	79
UL76	5254	3750	12	3809	2553	12
UL77	12428	9226	86	15281	11266	113
UL78	11035	8435	23	12013	9668	43
UL79	3481	2454	11	3461	2165	12
UL8	17319	12233	4	15537	12283	3
UL80	6887	5463	68	8084	6338	71
UL80.5	10615	7398	533	11108	7495	513
UL82	4676	2508	1057	3706	2004	821
UL83	8539	5757	500	9566	6230	592
UL84	18658	13102	139	18486	12905	139
UL85	7138	4905	105	4638	3359	76
UL86	19044	13487	485	18794	13193	486
UL87	5810	3515	39	5102	2822	53
UL88	5995	4511	23	5348	4087	21
UL89	3216	2100	21	2586	1640	20
UL9	20755	14688	NQ	20740	14020	NQ
UL91	10005	7692	NQ	7511	5754	NQ
UL92	10184	7824	3	5221	4127	3
UL93	3774	2583	25	3307	2148	17
UL94	8186	5985	84	8996	6226	137
UL95	15082	10181	103	15174	10261	105
UL96	5510	4250	23	3833	2888	19
UL97	5351	3787	0?	3430	2163	0?
UL98	9974	6280	803	8723	5860	628
UL99	17516	10685	111	16924	10586	97
US1	8836	6614	41	7163	5420	54
US10	15320	10767	77	14143	10639	18
US11	7861	5847	12	5496	4515	9
US12	19279	12208	45	20169	13973	34
US13	13569	9459	3	12869	9863	3
US14	19491	12777	15	19554	13738	16
US15	17435	11717	21	16211	11982	15
US16	17803	12096	NQ	18034	13026	NQ
US17	14964	9943	5	13183	9880	6
US18	14149	10188	NQ	15231	11463	1
US19	15373	10683	NQ	13946	10730	NQ
US2	6914	5365	15	8703	6585	14
US20	6128	4883	5	7232	6002	4
US21	8542	6681	NQ	10524	8407	NQ
US22	8543	4600	1429	8725	4707	1400
US23	11332	7278	88	8093	4875	45
US24	4827	3408	69	4366	3222	62
US26	11430	6703	734	11132	6658	643
US27	14714	10340	8	13238	10594	9
US28	10267	7538	2	11727	9132	0
US29	7929	5772	22	9403	7322	24
US3	5196	3991	7	6476	5138	12
US30	16003	11141	30	15370	10797	28
US31	11895	8308	2	9785	7285	2
US32	11209	7506	24	9231	5444	16
US33A	12329	9597	NQ	14489	10509	NQ
US34	6584	4444	7	4327	2680	2
US34A	19126	13594	NQ	19854	13772	NQ
US6	14223	9594	7	12740	8935	5
US7	24276	15793	10	22407	15450	9
US8	15616	11220	17	14707	10407	21
US9	21745	15396	32	21061	14408	41
