# Supplementary material for: Human cytomegalovirus interactome analysis identifies degradation hubs, domain associations and viral protein functions
Source: eLife. 2019 Dec 24;8:e49894. doi: 10.7554/eLife.49894 (PMC6959991; doi:10.7554/eLife.49894)
Supplement: Figure 1—figure supplement 1—source data 2. [file elife-49894-fig1-figsupp1-data2.xlsx]

## Sheet: Figure 1 – Figure Supplement 1D
RL1	Rep1 PSMs	Rep2 PSMs	Rep1 log10 PSMs	Rep2 log10 PSMs
CUL4A	39	33	1.59106	1.51851
DDA1	6	6	0.778151	0.778151
CUL4B	23	21	1.36173	1.32222
RL1	54	41	1.73239	1.61278
UL29	Rep1 PSMs	Rep2 PSMs	Rep1 log10 PSMs	Rep2 log10 PSMs
CDK2AP1	1	1	0	0
GPS2	3	4	0.477121	0.60206
HDAC3	5	9	0.69897	0.954243
TBL1X	7	10	0.845098	1
MBD3	16	16	1.20412	1.20412
TBL1XR1	16	16	1.20412	1.20412
HDAC1	21	24	1.32222	1.38021
MBD2	26	20	1.41497	1.30103
MTA3	28	34	1.44716	1.53148
UL29	37	37	1.5682	1.5682
MTA1	39	46	1.59106	1.66276
MTA1	39	46	1.59106	1.66276
NCOR2	41	57	1.61278	1.75587
CHD3	41	58	1.61278	1.76343
NCOR1	45	50	1.65321	1.69897
RBBP7	50	45	1.69897	1.65321
GATAD2A	69	73	1.83885	1.86332
GATAD2B	78	81	1.89209	1.90849
MTA2	83	67	1.91908	1.82607
CHD4	111	125	2.04532	2.09691
UL34	Rep1 PSMs	Rep2 PSMs	Rep1 log10 PSMs	Rep2 log10 PSMs
CDH13	1	1	0	0
PTPRK	1	1	0	0
PPP4C	2	2	0.30103	0.30103
PCDHGC3	5	6	0.69897	0.778151
DCHS1	6	3	0.778151	0.477121
FAT1	9	14	0.954243	1.14613
PPP4R3A	9	5	0.954243	0.69897
PPP4R2	16	5	1.20412	0.69897
UL34	70	62	1.8451	1.79239
UL38	Rep1 PSMs	Rep2 PSMs	Rep1 log10 PSMs	Rep2 log10 PSMs
RBBP7	4	2	0.60206	0.30103
ERBIN	5	2	0.69897	0.30103
TSC1	9	6	0.954243	0.778151
TSC2	103	81	2.01284	1.90849
UL38	120	94	2.07918	1.97313
USP24	257	159	2.40993	2.2014
UL43	Rep1 PSMs	Rep2 PSMs	Rep1 log10 PSMs	Rep2 log10 PSMs
YWHAG	140	116	2.14613	2.06446
YWHAQ	180	175	2.25527	2.24304
YWHAB	182	156	2.26007	2.19312
YWHAH	191	161	2.28103	2.20683
YWHAE	223	206	2.3483	2.31387
YWHAZ	247	228	2.3927	2.35793
UL43	366	464	2.56348	2.66652
UL72	Rep1 PSMs	Rep2 PSMs	Rep1 log10 PSMs	Rep2 log10 PSMs
RAVER1	2	2	0.30103	0.30103
BTG3	4	2	0.60206	0.30103
CNOT6	6	4	0.778151	0.60206
CNOT7	12	10	1.07918	1
CNOT11	12	9	1.07918	0.954243
CNOT8	12	12	1.07918	1.07918
RQCD1	14	16	1.14613	1.20412
CNOT6L	21	11	1.32222	1.04139
CAPZB	21	22	1.32222	1.34242
CAPZB	21	22	1.32222	1.34242
CNOT10	28	23	1.44716	1.36173
UL72	31	30	1.49136	1.47712
CNOT3	57	45	1.75587	1.65321
CNOT2	63	58	1.79934	1.76343
TNKS1BP1	142	118	2.15229	2.07188
CNOT1	205	181	2.31175	2.25768
