# Supplementary material for: Human cytomegalovirus interactome analysis identifies degradation hubs, domain associations and viral protein functions
Source: eLife. 2019 Dec 24;8:e49894. doi: 10.7554/eLife.49894 (PMC6959991; doi:10.7554/eLife.49894)
Supplement: Figure 6—source data 1. [file elife-49894-fig6-data1.xlsx]

## Sheet: Figure 6F - source data 1
		GFP-forming units		Average		Standard Dev
		Wt	∆ORFL147C	Wt	∆ORFL147C	Wt	∆ORFL147C	t-test p-value
	d0	1000000	1000000	1000000	1000000	-	-	-
	d2	375	360	307.5	352.5	58.0948	43.3013	0.264127	ns
		240	405
		285	300
		330	345
	d4	9360	525	10245	390	787.75	104.642	0.000112701	***
		10485	315
		11205	420
		9930	300
	d8	30150	900	31537.5	858.75	1612.65	192.63	3.23347e-05
		30150	1065						****
		32700	600
		33150	870
	d10	4230	375	3986.25	303.75	557.276	91.1386	0.000746008	***
		4545	390
		3240	225
		3930	225
	p<0.05 (*), p<0.01 (**), p<0.001 (***), p<0.0001 (****)
