# Supplementary material for: Human cytomegalovirus interactome analysis identifies degradation hubs, domain associations and viral protein functions
Source: eLife. 2019 Dec 24;8:e49894. doi: 10.7554/eLife.49894 (PMC6959991; doi:10.7554/eLife.49894)
Supplement: Figure 6—source data 2. [file elife-49894-fig6-data2.xlsx]

## Sheet: Figure 6G - source data 1
Protein Id	Gene Symbol	Description	Number of peptides	Mock Normalised S:N	Wt Normalised S:N	ΔORFL147C Normalised S:N	Mock Normalised to 1	Wt Normalised to 1	ΔORFL147C Normalised to 1
ORFL147C_HCMVM	ORFL147C	Uncharacterised ORFL147C	9	1242.48	16739.9	1446.83	0.0742227	1	0.08643
sp|F5HCM1|UL123_HCMVM	UL123	55 kDa immediate-early protein 1 (VIE1) OS=Human cytomegalovirus (strain Merlin) GN=UL123 PE=3 SV=1	24	5372.51	33604.4	31700.5	0.159875	1	0.943344
sp|Q6SW29|UL122_HCMVM	UL122	Viral transcription factor IE2 (VIE2) OS=Human cytomegalovirus (strain Merlin) GN=UL122 PE=3 SV=1	27	1915.04	31788.9	28706.9	0.0602424	1	0.903049
