# Supplementary material for: Human cytomegalovirus interactome analysis identifies degradation hubs, domain associations and viral protein functions
Source: eLife journal article supplement (doi:10.7554/elife.49894), 2019-12-24
Supplement: supp [file elife-49894-supp-v1.zip]

# A

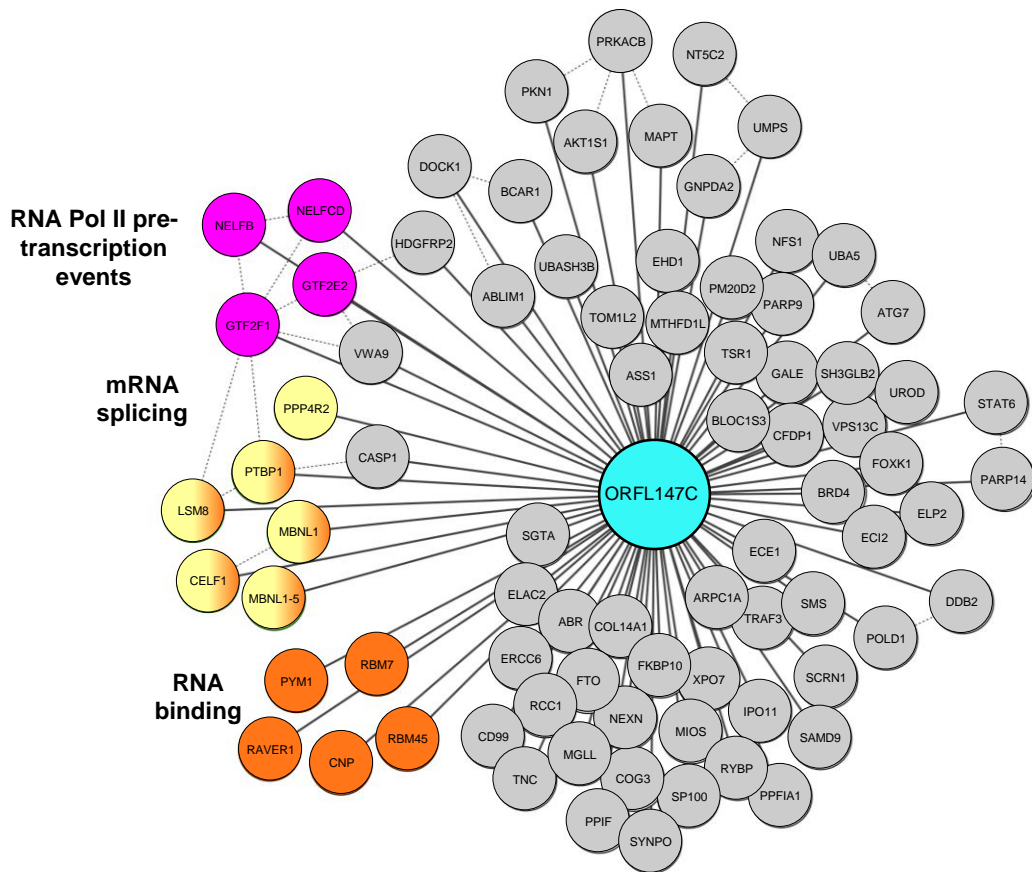

# B

### ORFL147C region

wt

32

FOR

**ORFL147C region, all Met mutated**

E M A Y E N C K S C V V C L K Q L L N M E M

TCCATGGCGTATTGTTGCACTTGAAACACACTAGACAGTTTCTGTAAACAAATTTCATCTCCATGACTCGACTCGGTCAAGTAAAGAGAGGTGTGTGTGGGTCTGGTGGGGCCAGAGACTA

G H R I R Q **V** E F V S R **V** T E T V F E D G H S S E S V Y S V S D D P R A G A L S -

[illegible]
