# Supplementary material for: Human cytomegalovirus interactome analysis identifies degradation hubs, domain associations and viral protein functions
Source: eLife. 2019 Dec 24;8:e49894. doi: 10.7554/eLife.49894 (PMC6959991; doi:10.7554/eLife.49894)
Supplement: Supplementary file 1. — (A) Relative abundance of all canonical and non-canonical viral proteins quantified in experiment whole cell lysate 3 (WCL3) from Weekes et al. (2014) and whole cell lysate series three from Fielding et al. (2017). Further details of the calculations employed are given in Figure 1—figure supplement 1A and the Materials and methods section. (B) Details of all 172 baits. Bait expression was verified by IB, MS or RT-qPCR (Figure 1—figure supplement 1B). (C) Relative abundance of all human proteins expressed in HFFFs, calculated as described in (A). The ‘rank’ column indicates the ranked average IBAQ abundance. The most abundant protein calculated by this method was ranked 1, and least abundant ranked 8129. (D) Coding sequences of all viral genes used in this study. A six base-pair linker region, a V5 tag then a stop codon directly followed each sequence (Key Resources Table). Codon usage was optimised for expression for US14, US17 and UL74. (E) Oligonucleotides and templates employed in the generation and RT-qPCR of each viral vector. (F) Oligonucleotides and templates employed in the generation and RT-qPCR of each human overexpression vector. [file elife-49894-supp1.xlsx]

## Sheet: Supplementary File 1A
Uniprot	Gene Symbol	IBAQ expt WCL3 (Weekes et al, Cell 2014)	IBAQ expt 3 (Fielding et al, eLife 2017)	Average IBAQ	Normalised IBAQ expt WCL3 (Weekes et al, Cell 2014)	Normalised IBAQ expt 3 (Fielding et al, eLife 2017)	Average normalised IBAQ	Range normalised IBAQ
Q6SW59	UL83	4.14714e+09	2.72186e+10	1.56829e+10	0.224309	0.192824	0.208566	0.0157424
F5HC97	UL44	3.44159e+09	2.27091e+10	1.30754e+10	0.186147	0.160878	0.173512	0.0126348
F5HGT1	UL86	4.59434e+08	1.24718e+10	6.4656e+09	0.0248497	0.0883534	0.0566015	0.0317518
F5HGJ4	UL25	6.70947e+08	5.40754e+09	3.03924e+09	0.0362899	0.0383084	0.0372992	0.00100927
Q6SW29	UL122	5.22266e+08	3.60838e+09	2.06532e+09	0.0282481	0.0255627	0.0269054	0.0013427
F5HAC7	UL94	7.82021e+08	1.51809e+09	1.15006e+09	0.0422976	0.0107546	0.0265261	0.0157715
Q6SW37	UL112	4.71264e+08	3.87749e+09	2.17438e+09	0.0254895	0.0274691	0.0264793	0.000989809
F5HDC7	US22	3.34583e+08	3.15515e+09	1.74487e+09	0.0180968	0.0223519	0.0202243	0.00212756
F5HDQ6	UL57	2.36892e+08	3.84394e+09	2.04042e+09	0.0128129	0.0272315	0.0200222	0.00720929
Q6SW04	IRS1	1.83289e+08	4.04487e+09	2.11408e+09	0.00991367	0.0286549	0.0192843	0.00937062
Q6SW81	UL50	2.85333e+08	3.14843e+09	1.71688e+09	0.015433	0.0223043	0.0188687	0.00343567
F5HI87	UL99	4.86035e+08	1.29899e+09	8.92511e+08	0.0262884	0.00920237	0.0177454	0.00854304
F5HAY6	UL36	2.98385e+08	2.32458e+09	1.31148e+09	0.0161389	0.016468	0.0163034	0.000164525
F5HB40	UL84	2.21071e+08	2.7734e+09	1.49724e+09	0.0119572	0.0196475	0.0158023	0.00384516
F5HIN9	UL85	2.86411e+08	2.10478e+09	1.1956e+09	0.0154913	0.0149108	0.015201	0.000290228
F5H8Q3	UL148	3.3512e+08	1.61873e+09	9.76924e+08	0.0181258	0.0114675	0.0147967	0.00332915
F5HCM1	UL123	1.83774e+08	2.4267e+09	1.30524e+09	0.00993988	0.0171914	0.0135656	0.00362575
Q6SW99	UL32	1.32007e+08	2.77257e+09	1.45229e+09	0.00713996	0.0196416	0.0133908	0.00625083
F5HC16	UL34	2.09741e+08	1.81223e+09	1.01098e+09	0.0113444	0.0128383	0.0120913	0.000746962
Q6SW62	UL80	2.57147e+08	1.33105e+09	7.94099e+08	0.0139084	0.00942952	0.011669	0.00223946
F5HEN7	UL48A	3.74084e+08	3.23365e+08	3.48725e+08	0.0202333	0.0022908	0.0112621	0.00897126
F5HF49	UL98	2.15809e+08	1.25303e+09	7.34422e+08	0.0116726	0.00887683	0.0102747	0.00139788
F5HBX1	UL146	2.80948e+08	6.92997e+08	4.86972e+08	0.0151958	0.00490937	0.0100526	0.0051432
Q6SW87	UL45	8.87189e+07	2.10758e+09	1.09815e+09	0.00479859	0.0149307	0.00986463	0.00506604
F5HB53	UL55	8.30125e+07	2.12693e+09	1.10497e+09	0.00448995	0.0150678	0.00977885	0.00528891
Q6SW73	UL69	1.13779e+08	1.77345e+09	9.43615e+08	0.00615401	0.0125636	0.0093588	0.00320479
Q6SW94-2	UL37	2.28021e+08	8.34351e+08	5.31186e+08	0.0123331	0.00591077	0.00912194	0.00321118
Q6RJQ3	UL141	9.22436e+07	1.75515e+09	9.23697e+08	0.00498923	0.012434	0.00871159	0.00372236
ORFL147C	ORFL147C	1.59451e+08	1.10183e+09	6.30639e+08	0.00862431	0.00780563	0.00821497	0.000409339
F5HEA3	UL71	2.09715e+08	6.34211e+08	4.21963e+08	0.011343	0.00449292	0.00791794	0.00342502
Q6SW77	UL54	6.04616e+07	1.51203e+09	7.86247e+08	0.00327022	0.0107116	0.00699093	0.00372071
F5HAQ7	UL135	9.89377e+07	1.20551e+09	6.52225e+08	0.0053513	0.00854017	0.00694573	0.00159443
F5HBC6	UL82	1.18096e+08	1.01648e+09	5.67288e+08	0.00638754	0.00720101	0.00679427	0.000406736
Q6SWD0	RL12	1.10845e+08	8.88886e+08	4.99865e+08	0.00599532	0.0062971	0.00614621	0.000150889
F5HE12	UL35	1.10857e+08	8.18663e+08	4.6476e+08	0.00599596	0.00579963	0.0058978	9.81676e-05
Q6SW46	UL97	5.38905e+07	1.19575e+09	6.2482e+08	0.00291481	0.008471	0.0056929	0.0027781
Q6SVX2	TRS1	7.20249e+07	8.45237e+08	4.58631e+08	0.00389565	0.00598788	0.00494176	0.00104611
Q6SW79	UL52	9.07392e+07	6.51441e+08	3.7109e+08	0.00490786	0.00461498	0.00476142	0.000146442
F5HC14	UL119	1.13928e+08	4.5071e+08	2.82319e+08	0.00616211	0.00319295	0.00467753	0.00148458
ORFL87W_(UL31)	ORFL87W_(UL31)	1.61204e+08	6.28363e+07	1.1202e+08	0.00871911	0.000445149	0.00458213	0.00413698
F5HF90	UL22A	1.3739e+08	9.51482e+07	1.16269e+08	0.00743111	0.000674055	0.00405258	0.00337853
F5HG68	UL16	1.24258e+08	1.81388e+08	1.52823e+08	0.00672082	0.001285	0.00400291	0.00271791
F5HGI9	UL51	1.08846e+08	2.81309e+08	1.95078e+08	0.00588724	0.00199287	0.00394005	0.00194719
F5HC79	UL56	4.52651e+07	7.48208e+08	3.96737e+08	0.00244828	0.00530051	0.00387439	0.00142611
Q6SW84	UL48	2.52896e+07	8.42242e+08	4.33766e+08	0.00136785	0.00596667	0.00366726	0.00229941
Q6SWD1	RL11	6.59361e+07	4.07981e+08	2.36958e+08	0.00356632	0.00289024	0.00322828	0.000338041
F5HGG3	UL26	5.52988e+07	4.49176e+08	2.52237e+08	0.00299098	0.00318208	0.00308653	9.55498e-05
Q6SW43	UL100	8.88909e+07	1.25969e+08	1.0743e+08	0.00480789	0.000892395	0.00285014	0.00195775
F5HA93	UL46	5.39443e+07	3.44182e+08	1.99063e+08	0.00291772	0.00243828	0.002678	0.000239721
F5HFZ4	UL53	4.8913e+07	3.2093e+08	1.84922e+08	0.00264558	0.00227356	0.00245957	0.000186013
F5HCU8	UL89	2.3135e+07	4.83586e+08	2.5336e+08	0.00125132	0.00342585	0.00233858	0.00108727
Q6SW00	US6	6.53524e+07	8.8835e+07	7.70937e+07	0.00353475	0.00062933	0.00208204	0.00145271
F5HEN8	UL105	1.53413e+07	4.16978e+08	2.1616e+08	0.000829775	0.00295398	0.00189188	0.0010621
Q6SW37-2	UL112-2	2.87342e+07	3.00028e+08	1.64381e+08	0.00155416	0.00212548	0.00183982	0.00028566
F5HGU6	UL132	4.2584e+07	1.521e+08	9.73419e+07	0.00230327	0.00107751	0.00169039	0.000612876
Q6SW85	UL47	8.72646e+06	3.94774e+08	2.0175e+08	0.000471993	0.00279668	0.00163434	0.00116234
F5HDK1	US27	3.67958e+07	1.71074e+08	1.03935e+08	0.00199019	0.00121193	0.00160106	0.00038913
F5HF44	UL145	4.5497e+07	7.24231e+07	5.89601e+07	0.00246082	0.000513065	0.00148694	0.000973879
F5HFA5	UL117	2.41427e+07	2.25409e+08	1.24776e+08	0.00130582	0.00159685	0.00145134	0.000145518
Q6SWA3	UL29	1.36505e+07	2.8773e+08	1.5069e+08	0.000738323	0.00203836	0.00138834	0.000650016
F7V998	UL150A	3.03059e+07	1.58202e+08	9.42541e+07	0.00163917	0.00112075	0.00137996	0.000259213
F5HC33	US9	3.38023e+07	1.22106e+08	7.79541e+07	0.00182829	0.00086503	0.00134666	0.000481628
Q6SW67	UL75	9.62257e+06	2.90179e+08	1.49901e+08	0.000520461	0.0020557	0.00128808	0.000767622
F5H9F9	UL88	8.66605e+06	2.78072e+08	1.43369e+08	0.000468726	0.00196994	0.00121933	0.000750606
F5H9N4	UL24	1.14264e+07	2.49751e+08	1.30589e+08	0.000618029	0.0017693	0.00119367	0.000575637
F5HGP1	UL74	1.73831e+07	1.71564e+08	9.44737e+07	0.000940211	0.00121541	0.00107781	0.000137598
F5HI32	RL10	2.68323e+07	7.43676e+07	5.06e+07	0.00145129	0.00052684	0.000989067	0.000462227
Q6SWC6	UL4	3.06326e+07	3.63332e+07	3.34829e+07	0.00165684	0.000257394	0.000957119	0.000699725
F5HBR4	UL104	1.54215e+07	1.51007e+08	8.32144e+07	0.00083411	0.00106978	0.000951943	0.000117833
F5HB52	US8	2.96465e+07	3.60924e+07	3.28694e+07	0.00160351	0.000255688	0.000929597	0.000673909
F5HC16	UL34	2.09741e+08	1.81223e+09	1.01098e+09	0.00148442	0.000158636	0.000821526	0.000662891
Q6SW05	UL150	6.90816e+06	1.79065e+08	9.29868e+07	0.000373646	0.00126855	0.000821096	0.00044745
F5HI85	UL114	7.87904e+06	1.65334e+08	8.66067e+07	0.000426158	0.00117127	0.000798715	0.000372557
F5HET1	UL78	1.08906e+07	1.31746e+08	7.13185e+07	0.000589049	0.000933326	0.000761187	0.000172139
F5H8S6	US24	9.75071e+06	1.24799e+08	6.72751e+07	0.000527392	0.000884112	0.000705752	0.00017836
Q6SWA0	UL31	1.85962e+07	4.67883e+07	3.26923e+07	0.00100582	0.000331461	0.000668643	0.000337182
F5HG98	UL38	1.28375e+07	8.14232e+07	4.71304e+07	0.000694349	0.000576824	0.000635586	5.87624e-05
F5HFG3	UL41A	1.95981e+07	1.54945e+07	1.75463e+07	0.00106002	0.000109767	0.000584891	0.000475124
F5HCP3	UL130	1.91738e+07	1.6917e+07	1.80454e+07	0.00103706	0.000119845	0.000578454	0.00045861
Q6SWB8	UL13	3.77496e+06	1.31725e+08	6.77499e+07	0.000204178	0.000933174	0.000568676	0.000364498
F5HCH8	UL115	6.38804e+06	9.27896e+07	4.95888e+07	0.000345514	0.000657346	0.00050143	0.000155916
Q6SW98	UL33	9.51934e+06	6.65267e+07	3.8023e+07	0.000514878	0.000471293	0.000493085	2.17925e-05
F5HB41	US30	8.39017e+06	6.34793e+07	3.59347e+07	0.000453804	0.000449704	0.000451754	2.05006e-06
F5HHT4	UL17	8.54411e+06	6.13595e+07	3.49518e+07	0.00046213	0.000434687	0.000448409	1.37214e-05
F5HFJ7	US10	1.50553e+07	7.99643e+06	1.15258e+07	0.000814303	5.66488e-05	0.000435476	0.000378827
Q6SW82	UL49	2.01058e+06	1.07444e+08	5.47271e+07	0.000108747	0.000761159	0.000434953	0.000326206
Q6SW89	UL43	2.91434e+06	9.71442e+07	5.00293e+07	0.000157629	0.000688195	0.000422912	0.000265283
Q6SW65	UL77	4.88601e+06	7.89853e+07	4.19357e+07	0.000264272	0.000559553	0.000411913	0.00014764
F5HA06	UL147	1.12117e+07	2.94996e+07	2.03557e+07	0.000606414	0.000208983	0.000407699	0.000198715
F5HF62	US28	1.37385e+07	5.11757e+06	9.42801e+06	0.00074308	3.62542e-05	0.000389667	0.000353413
Q6SW55	UL87	2.27472e+06	8.87916e+07	4.55331e+07	0.000123034	0.000629023	0.000376028	0.000252995
Q6SW48	UL95	5.96963e+06	5.5384e+07	3.06768e+07	0.000322883	0.000392355	0.000357619	3.47363e-05
Q6SW66	UL76	5.1962e+06	6.05838e+07	3.289e+07	0.00028105	0.000429192	0.000355121	7.4071e-05
F5H8R6	UL96	1.07489e+07	1.4954e+07	1.28515e+07	0.000581381	0.000105938	0.00034366	0.000237721
F5HAZ3	US23	2.4147e+06	7.48332e+07	3.86239e+07	0.000130605	0.000530138	0.000330372	0.000199766
F5HAE6	UL15A	6.73157e+06	3.84037e+07	2.25676e+07	0.000364094	0.000272062	0.000318078	4.60162e-05
F5HIG1	UL102	6.21409e+06	4.17744e+07	2.39942e+07	0.000336105	0.000295941	0.000316023	2.00823e-05
Q6SW70	UL72	5.38581e+06	4.64708e+07	2.59283e+07	0.000291305	0.000329211	0.000310258	1.89531e-05
F5HDM3	UL23	7.28679e+06	1.88895e+07	1.30881e+07	0.000394125	0.000133818	0.000263971	0.000130153
F5HE44	US12	327611	6.9765e+07	3.50463e+07	1.77197e-05	0.000494234	0.000255977	0.000238257
F5HF35	UL136	7.07466e+06	1.71813e+07	1.2128e+07	0.000382651	0.000121717	0.000252184	0.000130467
Q6SW50	UL93	1.9988e+06	4.66071e+07	2.43029e+07	0.00010811	0.000330177	0.000219143	0.000111033
Q6SWC9	RL13	3.99935e+06	2.86506e+07	1.6325e+07	0.000216315	0.000202969	0.000209642	6.67322e-06
F5H991	US26	3.96154e+06	2.3648e+07	1.38048e+07	0.00021427	0.000167529	0.0001909	2.33706e-05
F5HE05	US2	4.60538e+06	1.7302e+07	1.09537e+07	0.000249094	0.000122572	0.000185833	6.3261e-05
Q6SVZ5	US11	4.65401e+06	1.56693e+07	1.01616e+07	0.000251724	0.000111005	0.000181365	7.03593e-05
ORFL294W	ORFL294W	5.81786e+06	6.15264e+06	5.98525e+06	0.000314674	4.3587e-05	0.00017913	0.000135543
Q6SWB7	UL14	1.50201e+06	3.74147e+07	1.94583e+07	8.12402e-05	0.000265055	0.000173148	9.19076e-05
F5HG51	UL70	599126	3.97172e+07	2.01582e+07	3.24053e-05	0.000281367	0.000156886	0.000124481
F5H9T4	UL9	2.48047e+06	1.70109e+07	9.74569e+06	0.000134163	0.00012051	0.000127336	6.82637e-06
ORFL86W	ORFL86W	3.1529e+06	5.56867e+06	4.36078e+06	0.000170533	3.94499e-05	0.000104991	6.55414e-05
F5HA10	UL103	3.20576e+06	4.84384e+06	4.0248e+06	0.000173392	3.4315e-05	0.000103853	6.95383e-05
ORFL321W	ORFL321W	3.15893e+06	1.47654e+06	2.31774e+06	0.000170859	1.04602e-05	9.06596e-05	8.01994e-05
F5HD03	US32	2.83485e+06	2.99941e+06	2.91713e+06	0.00015333	2.12486e-05	8.72893e-05	6.60407e-05
ORFS343C.iORF1	ORFS343C.iORF1	1.77829e+06	9.33836e+06	5.55833e+06	9.61835e-05	6.61554e-05	8.11694e-05	1.5014e-05
Q6SWA4	UL27	106510	2.01367e+07	1.01216e+07	5.76085e-06	0.000142654	7.42075e-05	6.84466e-05
F5HGC2	UL30	2.36422e+06	1.25037e+06	1.8073e+06	0.000127875	8.85797e-06	6.83664e-05	5.95085e-05
ORFL185C	ORFL185C	1.96964e+06	2.47744e+06	2.22354e+06	0.000106533	1.75509e-05	6.20418e-05	4.4491e-05
F5HET4	UL131A	1.23331e+06	6.74074e+06	3.98703e+06	6.67069e-05	4.77532e-05	5.723e-05	9.47684e-06
Q6SW59	UL83	4.14714e+09	2.72186e+10	1.56829e+10	8.79965e-05	1.90344e-05	5.35154e-05	3.44811e-05
Q6SWC5	UL5	1.14115e+06	6.29176e+06	3.71645e+06	6.17221e-05	4.45725e-05	5.31473e-05	8.57479e-06
ORFL71C_(UL24)	ORFL71C_(UL24)	1.43354e+06	1.7021e+06	1.56782e+06	7.75367e-05	1.20581e-05	4.47974e-05	3.27393e-05
Q6SWB9	UL11	1.5753e+06	590516	1.08291e+06	8.52043e-05	4.18337e-06	4.46938e-05	4.05105e-05
Q6SWD5	RL1	1.28786e+06	1.5738e+06	1.43083e+06	6.9657e-05	1.11492e-05	4.04031e-05	2.92539e-05
F5HFH0	US15	634438	6.43901e+06	3.53673e+06	3.43152e-05	4.56157e-05	3.99654e-05	5.65023e-06
F5HC71	UL111A	856790	4.26065e+06	2.55872e+06	4.63417e-05	3.01836e-05	3.82626e-05	8.07904e-06
F5HE69	US18	979749	995898	987823	5.29922e-05	7.0552e-06	3.00237e-05	2.29685e-05
Q6SW92	UL40	3.96979e+07		3.96979e+07	0.00214716		0.00214716
Q6SW14	UL139	2.3572e+07		2.3572e+07	0.00127495		0.00127495
ORFL299W	ORFL299W	4.49548e+06		4.49548e+06	0.00024315		0.00024315
F5HD92	US14		2.72157e+07	2.72157e+07		0.000192803	0.000192803
Q6SW03	US1	2.23048e+06		2.23048e+06	0.000120641		0.000120641
F5HEU0	US3		1.65046e+07	1.65046e+07		0.000116923	0.000116923
Q6SWC4	UL6		1.54236e+07	1.54236e+07		0.000109265	0.000109265
ORFL101C_(UL36)	ORFL101C_(UL36)		1.4316e+07	7.158e+06		0.000101418	0.000101418
ORFL251W	ORFL251W	1.25295e+06		1.25295e+06	6.77689e-05		6.77689e-05
Q6SW63	UL79		8.50973e+06	8.50973e+06		6.02852e-05	6.02852e-05
F5HGQ8	UL138		7.83218e+06	7.83218e+06		5.54852e-05	5.54852e-05
F5HI68	UL19	807782		807782	4.3691e-05		4.3691e-05
Q6SW10	UL133	675655		675655	3.65445e-05		3.65445e-05
F5HDD3	US7	577113		577113	3.12146e-05		3.12146e-05
F5HHH2	UL142	554819		554819	3.00088e-05		3.00088e-05
F5HD27	UL121		3.29437e+06	3.29437e+06		2.33382e-05	2.33382e-05
F5HGH8	US20		2.02911e+06	2.02911e+06		1.43747e-05	1.43747e-05
ORFL119C	ORFL119C	263230		263230	1.42375e-05		1.42375e-05
F5HAS7	UL92		1.37687e+06	1.37687e+06		9.75408e-06	9.75408e-06
ORFL131W	ORFL131W		815271	815271		5.7756e-06	5.7756e-06

## Sheet: Supplementary File 1B
	Gene	Description	Transmembrane regions	Lysis	Validation of bait expression
US region	US1	Protein US1	0	NP40	WB
	US2	Unique short US2 glycoprotein (Protein HQLF2)	1	NP40	MS
	US3	Immediate-early glycoprotein	1	NP40	WB
	US6	Membrane glycoprotein US6	1	NP40	WB
	US7	Membrane glycoprotein US7	1	NP40	WB
	US8	Membrane glycoprotein US8	1	NP40	WB
	US9	Membrane glycoprotein US9	1	NP40	WB, MS
	US10	Membrane glycoprotein US10	1	NP40	WB
	US11	Membrane glycoprotein US11	1	NP40	WB
	US12	Membrane protein US12	7	Digitonin	MS
	US13	Membrane protein US13	7	Digitonin	MS
	US14	Membrane protein US14	7	Digitonin	MS
	US15	Membrane protein US15	7	Digitonin	MS
	US16	Membrane protein US16	7	Digitonin	MS
	US17	Membrane protein US17	7	Digitonin	MS
	US18	Membrane protein US18	7	Digitonin	PCR
	US19	Membrane protein US19	7	Digitonin	WB
	US20	Membrane protein US20	7	Digitonin	WB
	US21	Membrane protein US21	7	Digitonin	WB
	US22	Tegument protein US22	0	NP40	WB
	US23	Protein US23	0	NP40	WB
	US24	Tegument protein US24	0	NP40	WB
	US26	Protein US26	0	NP40	WB
	US27	Envelope glycoprotein US27	7	Digitonin	MS
	US28	Envelope protein US28	7	Digitonin	WB, MS
	US29	Protein US29	2	Digitonin	WB
	US30	Membrane protein US30	1	NP40	WB
	US31	Protein US31	0	NP40	WB
	US32	Protein US32	0	NP40	WB
	US33A	Protein US33A	0	NP40	PCR
	US34	Protein US34	0	NP40	WB
	US34A	Protein US34A	1	NP40	WB
UL region	UL1	Membrane protein UL1	1	NP40	MS
	UL2	Protein UL2	1	NP40	PCR
	UL4	Envelope glycoprotein UL4	1	NP40	WB
	UL5	Protein UL5	0	NP40	WB
	UL6	Membrane protein UL6	1	NP40	MS
	UL7	CEACAM1-like protein UL7	1	NP40	WB
	UL8	Protein UL8	2	Digitonin	WB, MS
	UL9	Membrane glycoprotein UL9	1	NP40	PCR
	UL10	Membrane protein UL10	1	NP40	MS
	UL11	Membrane glycoprotein UL11	1	NP40	MS
	UL13	Protein UL13	0	NP40	MS
	UL14	Membrane protein UL14	1	NP40	WB
	UL15A	Protein UL15A	1	NP40	WB
	UL16	Membrane glycoprotein UL16	1	NP40	WB
	UL17	Protein UL17	0	NP40	WB
	UL18	Gp024 (Membrane glycoprotein UL18), MHC class I homolog	1	NP40	WB
	UL19	Protein UL19 (UL19)	0	NP40	WB
	UL20	Membrane protein UL20	1	NP40	WB, MS
	UL21A	Protein UL21A	0	NP40	MS
	UL22A	Glycoprotein UL22A	0	NP40	MS
	UL23	Tegument protein UL23	0	NP40	WB
	UL24	Tegument protein UL24	0	NP40	WB
	UL25	Phosphoprotein 85 (pp85)	0	NP40	WB
	UL26	Tegument protein UL26	0	NP40	WB, MS
	UL27	Protein UL27	0	NP40	WB
	UL29	Protein UL29	0	NP40	WB
	UL30	Protein UL30	0	NP40	MS
	UL30A	putative UL30A initiated by ACG codon; UL30 family	0	NP40	MS
	UL31	Protein UL31	0	NP40	WB
	UL32	Tegument protein pp150	0	NP40	MS
	UL33	G-protein coupled receptor homolog UL33	7	Digitonin	PCR
	UL34	Transcriptional regulator UL34	0	NP40	WB
	UL35	Tegument protein UL35	0	NP40	WB
	UL36	Tegument protein, Viral inhibitor of caspase-8-induced apoptosis (vICA)	0	NP40	WB
	UL37	Envelope glycoprotein UL37	1	NP40	WB
	UL38	Apoptosis inhibitor UL38	0	NP40	WB
	UL40	Membrane glycoprotein UL40	0	NP40	WB
	UL41A	Protein UL41A	1	NP40	WB
	UL42	Protein UL42	1	NP40	WB
	UL43	Tegument protein UL43	0	NP40	WB
	UL44	DNA polymerase accessory protein (DNA polymerase processivity subunit)	0	NP40	WB
	UL45	Ribonucleotide reductase subunit 1	0	NP40	WB
	UL46	Capsid triplex subunit 1 (TRX1)	0	NP40	WB
	UL47	Inner Tegument protein, ITP	0	NP40	WB, MS
	UL48-H1	Large Tegument protein, LTP	0	NP40	WB, PCR
	UL48-H2	Large Tegument protein, LTP	0	NP40	MS, PCR
	UL48A	Small capsomere-interacting protein	0	NP40	PCR
	UL49	Protein UL49	0	NP40	WB
	UL50	Virion nuclear egress NEC2	1	NP40	WB
	UL51	DNA packaging protein, Tripartite terminase subunit 2	0	NP40	MS
	UL52	Packaging protein UL32 homolog	0	NP40	WB
	UL53	Virion nuclear egress NEC1	0	NP40	WB
	UL54	DNA polymerase	0	NP40	WB
	UL55	Envelope glycoprotein B (gB)	1	NP40	WB
	UL56	DNA packaging protein, Tripartite terminase subunit 1	0	NP40	WB
	UL57	Major DNA binding protein (Single-stranded DNA-binding protein)	0	NP40	WB, MS
	UL69	Multifunctional expression regulator, mRNA export factor ICP27 homolog	0	NP40	WB
	UL70	Helicase-primase primase subunit (Primase)	0	NP40	WB
	UL71	Tegument protein UL51	0	NP40	WB
	UL72	Deoxyuridine 5'-triphosphate nucleotidohydrolase (dUTPase)	0	NP40	WB
	UL73	Envelope glycoprotein N	1	NP40	WB
	UL74	Envelope glycoprotein O	1	NP40	WB
	UL74A	Protein UL74A	1	NP40	WB
	UL75	Envelope glycoprotein H (gH)	1	NP40	WB
	UL76	Nuclear protein UL24	0	NP40	WB
	UL77	DNA packaging tegument protein, CVC2	0	NP40	WB, MS
	UL78	Envelope protein UL78	7	Digitonin	WB
	UL79	Protein UL79	0	NP40	WB
	UL80	Capsid maturation protease	0	NP40	MS
	UL80.5	Capsid scaffold protein	0	NP40	WB
	UL82	Tegument protein pp71	0	NP40	WB
	UL83	Tegument protein pp65	0	NP40	WB
	UL84	Protein UL84	0	NP40	MS
	UL85	Capsid triplex subunit 2 (TRX2)	0	NP40	WB
	UL86	Major capsid protein (MCP)	0	NP40	MS
	UL87	Protein UL87	0	NP40	WB
	UL88	Tegument protein UL88	0	NP40	WB
	UL89	DNA packaging protein, Tripartite terminase subunit 3	0	NP40	WB
	UL91	Protein UL91	0	NP40	PCR
	UL92	Protein UL92	0	NP40	MS
	UL93	DNA packaging tegument protein, CVC1	0	NP40	WB
	UL94	Cytoplasmic envelopment protein 2	0	NP40	WB
	UL95	Protein UL95	0	NP40	WB
	UL96	Tegument protein UL14 homolog	0	NP40	MS
	UL97	Serine/threonine protein kinase UL97	0	NP40	WB
	UL98	Alkaline nuclease	0	NP40	WB
	UL99	Cytoplasmic envelopment protein 3	Lipid-anchor	NP40	WB
	UL100	Envelope glycoprotein M (gM)	8	Digitonin	WB
	UL102	Helicase-primase subunit (Primase-helicase associated protein)	0	NP40	WB
	UL103	Cytoplasmic envelopment protein 1	0	NP40	WB
	UL104	Capsid portal protein	0	NP40	WB
	UL105	Helicase (Helicase-primase helicase subunit)	0	NP40	WB, MS
	UL111A	Interleukin-10-like protein	0	NP40	WB
	UL112	Early phosphoprotein p84	0	NP40	WB
	UL114	UL114 (Uracil-DNA glycosylase)	0	NP40	WB
	UL115	Envelope glycoprotein L (gL)	1	NP40	WB
	UL116	Protein UL116	0	NP40	WB
	UL117	Protein UL117 (UL117)	0	NP40	WB
	UL119	Viral Fc-gamma receptor-like protein UL119 (gp68)	1	NP40	WB
	UL120	Membrane protein UL120	1	NP40	MS
	UL121	Membrane protein UL121	1	NP40	WB
	UL122	Viral transcription factor IE2	0	NP40	WB
	UL123	Regulatory protein IE1	0	NP40	WB
	UL124	Membrane protein UL124	1	NP40	WB
	UL128	Envelope protein UL128	0	NP40	WB
	UL130	Envelope glycoprotein UL130	1	NP40	WB
	UL131A	Envelope protein UL131A	1	NP40	WB
	UL132	Envelope glycoprotein UL132	1	NP40	WB
	UL133	Protein UL133	2	NP40	WB
	UL135	Protein UL135	1	NP40	MS
	UL136	Protein UL136	1	NP40	FAILED to validate
	UL138	Protein UL138	1	NP40	WB
	UL139	Membrane glycoprotein UL139	1	NP40	WB
	UL140	Protein UL140	1	NP40	WB
	UL141	Membrane glycoprotein UL141	1	NP40	WB
	UL142	Membrane glycoprotein UL142 (MHC class I like molecule)	1	NP40	WB
	UL144	Membrane glycoprotein UL144 (TNF alpha-like receptor)	1	NP40	WB
	UL145	Protein UL145	0	NP40	WB
	UL146	Alpha-chemokine UL146 (Chemokine vCXCL1)	0	NP40	MS
	UL147	Alpha-chemokine UL147 (Chemokine vCXCL2)	0	NP40	MS
	UL147A	Membrane protein UL147A	1	NP40	WB
	UL148	Membrane protein UL148	1	NP40	WB
	UL148A	Protein UL148A	1	NP40	WB
	UL148B	Protein UL148B	1	NP40	WB
	UL148C	Protein UL148C	2	Digitonin	WB
	UL148D	Protein UL148D	1	NP40	MS
	UL150	Protein UL150	0	NP40	WB
	UL150A	Protein UL150A	0	NP40	WB
	TRS1	Tegument protein TRS1	0	NP40	WB
	RL1	Uncharacterized protein (IRL1) (TRL1)	0	NP40	WB
	RL5A	Protein RL5A	0	NP40	MS
	RL6	Uncharacterized protein IRL6	0	NP40	MS
	RL8A	Protein RL8A	1	NP40	MS
	RL9A	Protein RL9A	1	NP40	PCR
	RL10	Envelope glycoprotein RL10	1	NP40	WB
	RL11	Membrane glycoprotein RL11	1	NP40	WB
	RL12	Membrane protein RL12	1	NP40	PCR
	RL13	Membrane protein RL13	1	NP40	WB
	IRS1	Tegument protein IRS1	0	NP40	WB
	ORFL147C	Novel ORF overlapping with UL56 canonical gene, in the same orientation	0	NP40	WB
	ORFS343C	Novel ORF overlapping with US16 canonical gene, in the same orientation	0	NP40	WB

## Sheet: Supplementary File 1C
Uniprot	Uniprot-s	Gene Symbol	Description	IBAQ expt WCL3 (Weekes et al, Cell 2014)	IBAQ expt 3 (Fielding et al, eLife 2017)	Average IBAQ	Normalised IBAQ expt WCL3 (Weekes et al, Cell 2014)	Normalised IBAQ expt 3 (Fielding et al, eLife 2017)	Average normalised IBAQ	Range normalised IBAQ	Rank
P09382	P09382	LGALS1	Galectin-1	1.08746e+10	2.33535e+09	6.60498e+09	0.0317225	0.0203186	0.0260205	0.00570198	1
P62805	P62805	HIST1H4A	Histone H4	6.04449e+09	2.98664e+09	4.51556e+09	0.0176325	0.0259851	0.0218088	0.00417629	2
P68032	P68032	ACTC1	Actin, alpha cardiac muscle 1	4.82275e+09	3.30043e+09	4.06159e+09	0.0140685	0.0287152	0.0213919	0.00732333	3
P68431	P68431	HIST1H3A	Histone H3.1	8.1824e+09	1.87416e+09	5.02828e+09	0.023869	0.016306	0.0200875	0.00378149	4
Q5QNW6-2	Q5QNW6	HIST2H2BF	Isoform 2 of Histone H2B type 2-F	5.91364e+09	1.76427e+09	3.83896e+09	0.0172508	0.0153499	0.0163004	0.000950435	5
P08670	P08670	VIM	Vimentin	5.64234e+09	1.77951e+09	3.71092e+09	0.0164594	0.0154825	0.015971	0.000488409	6
P07355-2	P07355	ANXA2	Isoform 2 of Annexin A2	4.54729e+09	1.91566e+09	3.23148e+09	0.013265	0.0166671	0.0149661	0.00170106	7
P16104	P16104	H2AFX	Histone H2AX	3.88543e+09	1.60625e+09	2.74584e+09	0.0113343	0.0139751	0.0126547	0.00132043	8
P11021	P11021	HSPA5	78 kDa glucose-regulated protein	3.06168e+09	7.43098e+08	1.90239e+09	0.00893129	0.00646528	0.00769829	0.00123301	9
P06748	P06748	NPM1	Nucleophosmin	3.47783e+09	4.57362e+08	1.9676e+09	0.0101453	0.00397925	0.00706225	0.003083	10
P23284	P23284	PPIB	Peptidyl-prolyl cis-trans isomerase B	2.44654e+09	7.17091e+08	1.58182e+09	0.00713685	0.00623901	0.00668793	0.000448919	11
P60903	P60903	S100A10	Protein S100-A10	2.00069e+09	8.6201e+08	1.43135e+09	0.00583626	0.00749987	0.00666807	0.000831806	12
P06703	P06703	S100A6	Protein S100-A6	1.6357e+09	9.4068e+08	1.28819e+09	0.00477154	0.00818434	0.00647794	0.0017064	13
P04083	P04083	ANXA1	Annexin A1	2.1102e+09	7.43797e+08	1.427e+09	0.00615571	0.00647137	0.00631354	0.000157828	14
P04406	P04406	GAPDH	Glyceraldehyde-3-phosphate dehydrogenase	2.27743e+09	6.4881e+08	1.46312e+09	0.00664353	0.00564494	0.00614423	0.000499297	15
P08758	P08758	ANXA5	Annexin A5	2.22986e+09	6.51285e+08	1.44057e+09	0.00650477	0.00566647	0.00608562	0.000419149	16
P61604	P61604	HSPE1	10 kDa heat shock protein, mitochondrial	2.22332e+09	5.93605e+08	1.40846e+09	0.00648567	0.00516462	0.00582515	0.000660525	17
P10809	P10809	HSPD1	60 kDa heat shock protein, mitochondrial	2.34055e+09	3.28805e+08	1.33468e+09	0.00682767	0.00286075	0.00484421	0.00198346	18
P02545	P02545	LMNA	Prelamin-A/C	1.51216e+09	5.57864e+08	1.03501e+09	0.00441114	0.00485366	0.0046324	0.000221259	19
P11142	P11142	HSPA8	Heat shock cognate 71 kDa protein	1.61198e+09	5.24166e+08	1.06807e+09	0.00470234	0.00456048	0.00463141	7.09295e-05	20
P27797	P27797	CALR	Calreticulin	1.64255e+09	4.67423e+08	1.05499e+09	0.00479151	0.00406679	0.00442915	0.000362359	21
P25398	P25398	RPS12	40S ribosomal protein S12	2.21057e+09	2.6566e+08	1.23812e+09	0.00644851	0.00231136	0.00437993	0.00206857	22
P14625	P14625	HSP90B1	Endoplasmin	1.61599e+09	4.43516e+08	1.02975e+09	0.00471402	0.00385879	0.00428641	0.000427615	23
P39019	P39019	RPS19	40S ribosomal protein S19	1.30827e+09	4.99446e+08	9.03858e+08	0.00381638	0.0043454	0.00408089	0.000264511	24
P61353	P61353	RPL27	60S ribosomal protein L27	1.34138e+09	4.84498e+08	9.12939e+08	0.00391297	0.00421535	0.00406416	0.000151193	25
P30101	P30101	PDIA3	Protein disulfide-isomerase A3	1.31267e+09	4.92626e+08	9.02648e+08	0.00382921	0.00428607	0.00405764	0.000228428	26
Q07020	Q07020	RPL18	60S ribosomal protein L18	1.65261e+09	3.74426e+08	1.01352e+09	0.00482087	0.00325767	0.00403927	0.000781598	27
P31949	P31949	S100A11	Protein S100-A11	1.29381e+09	4.59477e+08	8.76643e+08	0.00377419	0.00399765	0.00388592	0.000111729	28
P62851	P62851	RPS25	40S ribosomal protein S25	1.14853e+09	5.0074e+08	8.24637e+08	0.00335041	0.00435666	0.00385354	0.000503127	29
Q6NZI2	Q6NZI2	PTRF	Polymerase I and transcript release factor	1.73764e+09	2.88754e+08	1.01319e+09	0.00506889	0.00251228	0.00379059	0.0012783	30
P62277	P62277	RPS13	40S ribosomal protein S13	1.34954e+09	3.89221e+08	8.69378e+08	0.00393676	0.0033864	0.00366158	0.000275179	31
P07237	P07237	P4HB	Protein disulfide-isomerase	1.46161e+09	3.38431e+08	9.00018e+08	0.00426368	0.0029445	0.00360409	0.000659588	32
Q05639	Q05639	EEF1A2	Elongation factor 1-alpha 2	1.43786e+09	3.1946e+08	8.7866e+08	0.00419441	0.00277944	0.00348693	0.000707483	33
P46778	P46778	RPL21	60S ribosomal protein L21	1.05955e+09	4.3941e+08	7.49481e+08	0.00309084	0.00382306	0.00345695	0.000366112	34
P62937	P62937	PPIA	Peptidyl-prolyl cis-trans isomerase A	1.27559e+09	3.51683e+08	8.13637e+08	0.00372105	0.0030598	0.00339042	0.000330626	35
P49207	P49207	RPL34	60S ribosomal protein L34	9.76033e+08	4.33155e+08	7.04594e+08	0.0028472	0.00376864	0.00330792	0.000460721	36
P16401	P16401	HIST1H1B	Histone H1.5	9.16951e+08	4.50423e+08	6.83687e+08	0.00267485	0.00391888	0.00329687	0.000622014	37
P22626	P22626	HNRNPA2B1	Heterogeneous nuclear ribonucleoproteins A2/B1	8.99891e+08	4.21928e+08	6.60909e+08	0.00262509	0.00367096	0.00314802	0.000522937	38
P61254	P61254	RPL26	60S ribosomal protein L26	1.30931e+09	2.79441e+08	7.94378e+08	0.00381942	0.00243126	0.00312534	0.000694079	39
Q969H8	Q969H8	MYDGF	Myeloid-derived growth factor	1.1185e+09	3.4296e+08	7.30729e+08	0.00326279	0.00298391	0.00312335	0.000139443	40
P63173	P63173	RPL38	60S ribosomal protein L38	7.58934e+08	4.55627e+08	6.0728e+08	0.0022139	0.00396416	0.00308903	0.000875128	41
P62280	P62280	RPS11	40S ribosomal protein S11	8.97956e+08	4.03648e+08	6.50802e+08	0.00261944	0.00351192	0.00306568	0.000446236	42
P50454	P50454	SERPINH1	Serpin H1	8.88607e+08	4.00496e+08	6.44551e+08	0.00259217	0.00348449	0.00303833	0.000446158	43
P40429	P40429	RPL13A	60S ribosomal protein L13a	1.10672e+09	3.26747e+08	7.16734e+08	0.00322844	0.00284285	0.00303564	0.000192794	44
P05387	P05387	RPLP2	60S acidic ribosomal protein P2	1.36581e+09	2.39272e+08	8.02543e+08	0.00398424	0.00208177	0.00303301	0.000951236	45
P62424	P62424	RPL7A	60S ribosomal protein L7a	1.11814e+09	3.22036e+08	7.20088e+08	0.00326175	0.00280185	0.0030318	0.000229947	46
P23396	P23396	RPS3	40S ribosomal protein S3	1.25538e+09	2.4712e+08	7.51249e+08	0.00366209	0.00215005	0.00290607	0.000756018	47
P02751	P02751	FN1	Fibronectin	4.21296e+08	5.25729e+08	4.73512e+08	0.00122897	0.00457407	0.00290152	0.00167255	48
P46781	P46781	RPS9	40S ribosomal protein S9	8.46528e+08	3.75625e+08	6.11076e+08	0.00246942	0.0032681	0.00286876	0.000399341	49
P19338	P19338	NCL	Nucleolin	1.03185e+09	2.88159e+08	6.60006e+08	0.00301003	0.00250712	0.00275857	0.000251459	50
P18124	P18124	RPL7	60S ribosomal protein L7	8.59483e+08	3.41345e+08	6.00414e+08	0.00250721	0.00296986	0.00273853	0.000231322	51
P30050	P30050	RPL12	60S ribosomal protein L12	9.3721e+08	3.11045e+08	6.24127e+08	0.00273395	0.00270623	0.00272009	1.38626e-05	52
P08133	P08133	ANXA6	Annexin A6	7.87046e+08	3.6062e+08	5.73833e+08	0.00229591	0.00313755	0.00271673	0.000420824	53
P46779	P46779	RPL28	60S ribosomal protein L28	9.31751e+08	3.09196e+08	6.20474e+08	0.00271803	0.00269015	0.00270409	1.39405e-05	54
P62244	P62244	RPS15A	40S ribosomal protein S15a	9.98933e+08	2.83625e+08	6.41279e+08	0.00291401	0.00246766	0.00269083	0.000223173	55
P61247	P61247	RPS3A	40S ribosomal protein S3a	8.13391e+08	3.4329e+08	5.78341e+08	0.00237276	0.00298678	0.00267977	0.000307011	56
P62266	P62266	RPS23	40S ribosomal protein S23	7.83807e+08	3.49008e+08	5.66408e+08	0.00228646	0.00303653	0.00266149	0.000375034	57
P62917	P62917	RPL8	60S ribosomal protein L8	7.11077e+08	3.73284e+08	5.4218e+08	0.0020743	0.00324773	0.00266101	0.000586719	58
Q9Y3U8	Q9Y3U8	RPL36	60S ribosomal protein L36	1.13291e+09	2.25669e+08	6.79291e+08	0.00330484	0.00196342	0.00263413	0.000670707	59
P60709	P60709	ACTB	Actin, cytoplasmic 1	8.09329e+08	3.32502e+08	5.70916e+08	0.00236091	0.00289292	0.00262691	0.000266005	60
P62857	P62857	RPS28	40S ribosomal protein S28	1.13766e+09	2.21042e+08	6.79352e+08	0.0033187	0.00192316	0.00262093	0.000697767	61
P18077	P18077	RPL35A	60S ribosomal protein L35a	1.22963e+09	1.89877e+08	7.09755e+08	0.00358699	0.00165201	0.0026195	0.000967489	62
P40926	P40926	MDH2	Malate dehydrogenase, mitochondrial	9.93944e+08	2.49635e+08	6.21789e+08	0.00289945	0.00217193	0.00253569	0.000363759	63
P62750	P62750	RPL23A	60S ribosomal protein L23a	8.78423e+08	2.83748e+08	5.81086e+08	0.00256246	0.00246874	0.0025156	4.68641e-05	64
P62249	P62249	RPS16	40S ribosomal protein S16	8.40689e+08	2.79839e+08	5.60264e+08	0.00245239	0.00243473	0.00244356	8.83037e-06	65
P06753	P06753	TPM3	Tropomyosin alpha-3 chain	4.56651e+08	4.06556e+08	4.31603e+08	0.00133211	0.00353721	0.00243466	0.00110255	66
P35268	P35268	RPL22	60S ribosomal protein L22	1.00649e+09	2.09155e+08	6.07822e+08	0.00293605	0.00181974	0.00237789	0.000558155	67
P32969	P32969	RPL9	60S ribosomal protein L9	1.0017e+09	2.08678e+08	6.05191e+08	0.00292209	0.00181559	0.00236884	0.00055325	68
P62269	P62269	RPS18	40S ribosomal protein S18	9.14271e+08	2.36136e+08	5.75204e+08	0.00266704	0.00205449	0.00236076	0.000306274	69
P26373	P26373	RPL13	60S ribosomal protein L13	7.39224e+08	2.94027e+08	5.16625e+08	0.0021564	0.00255816	0.00235728	0.00020088	70
P51991	P51991	HNRNPA3	Heterogeneous nuclear ribonucleoprotein A3	6.49527e+08	3.23864e+08	4.86695e+08	0.00189475	0.00281776	0.00235625	0.000461508	71
P23528	P23528	CFL1	Cofilin-1	7.10528e+08	3.019e+08	5.06214e+08	0.00207269	0.00262666	0.00234968	0.000276983	72
P15880	P15880	RPS2	40S ribosomal protein S2	7.98739e+08	2.72018e+08	5.35379e+08	0.00233002	0.00236668	0.00234835	1.83313e-05	73
P62861	P62861	FAU	40S ribosomal protein S30	8.10336e+08	2.67985e+08	5.3916e+08	0.00236384	0.00233159	0.00234772	1.61261e-05	74
P83731	P83731	RPL24	60S ribosomal protein L24	7.59485e+08	2.78279e+08	5.18882e+08	0.00221551	0.00242115	0.00231833	0.00010282	75
P62241	P62241	RPS8	40S ribosomal protein S8	7.96341e+08	2.64425e+08	5.30383e+08	0.00232302	0.00230062	0.00231182	1.12029e-05	76
P17096	P17096	HMGA1	High mobility group protein HMG-I/HMG-Y	8.67659e+08	2.37804e+08	5.52731e+08	0.00253106	0.002069	0.00230003	0.00023103	77
P08708	P08708	RPS17	40S ribosomal protein S17	7.81665e+08	2.61901e+08	5.21783e+08	0.00228021	0.00227866	0.00227943	7.7481e-07	78
P25705	P25705	ATP5A1	ATP synthase subunit alpha, mitochondrial	6.72088e+08	2.96093e+08	4.8409e+08	0.00196056	0.00257614	0.00226835	0.00030779	79
Q6DN03	Q6DN03	HIST2H2BC	Putative histone H2B type 2-C	2.62386e+08	4.32357e+08	3.47372e+08	0.000765411	0.0037617	0.00226355	0.00149814	80
P07910-2	P07910	HNRNPC	Isoform C1 of Heterogeneous nuclear ribonucleoproteins C1/C2	8.42306e+08	2.3552e+08	5.38913e+08	0.00245711	0.00204913	0.00225312	0.000203989	81
P62888	P62888	RPL30	60S ribosomal protein L30	7.45551e+08	2.56245e+08	5.00898e+08	0.00217486	0.00222944	0.00220215	2.72925e-05	82
P63244	P63244	RACK1	Receptor of activated protein C kinase 1	8.52394e+08	2.18669e+08	5.35531e+08	0.00248653	0.00190252	0.00219452	0.000292009	83
P05388	P05388	RPLP0	60S acidic ribosomal protein P0	7.31967e+08	2.50984e+08	4.91476e+08	0.00213524	0.00218368	0.00215946	2.42197e-05	84
P04179	P04179	SOD2	Superoxide dismutase [Mn], mitochondrial	1.14221e+09	1.03917e+08	6.23061e+08	0.00333195	0.000904121	0.00211804	0.00121391	85
P39023	P39023	RPL3	60S ribosomal protein L3	8.5228e+08	2.01009e+08	5.26645e+08	0.0024862	0.00174886	0.00211753	0.000368669	86
P38646	P38646	HSPA9	Stress-70 protein, mitochondrial	7.86944e+08	2.19473e+08	5.03209e+08	0.00229561	0.00190951	0.00210256	0.000193047	87
P36578	P36578	RPL4	60S ribosomal protein L4	8.72111e+08	1.88426e+08	5.30268e+08	0.00254405	0.00163939	0.00209172	0.000452331	88
P27635	P27635	RPL10	60S ribosomal protein L10	5.67712e+08	2.8768e+08	4.27696e+08	0.00165608	0.00250294	0.00207951	0.000423429	89
P62753	P62753	RPS6	40S ribosomal protein S6	7.0323e+08	2.34178e+08	4.68704e+08	0.00205141	0.00203745	0.00204443	6.97822e-06	90
P62829	P62829	RPL23	60S ribosomal protein L23	8.57091e+08	1.77999e+08	5.17545e+08	0.00250023	0.00154867	0.00202445	0.00047578	91
P07737	P07737	PFN1	Profilin-1	7.32161e+08	2.15704e+08	4.73932e+08	0.0021358	0.00187672	0.00200626	0.000129541	92
P46777	P46777	RPL5	60S ribosomal protein L5	6.82437e+08	2.31606e+08	4.57022e+08	0.00199075	0.00201508	0.00200291	1.2165e-05	93
P63313	P63313	TMSB10	Thymosin beta-10	8.53876e+08	1.71149e+08	5.12512e+08	0.00249086	0.00148907	0.00198996	0.000500892	94
P42766	P42766	RPL35	60S ribosomal protein L35	8.26668e+08	1.79935e+08	5.03301e+08	0.00241149	0.00156551	0.0019885	0.000422989	95
Q5VTE0	Q5VTE0	EEF1A1P5	Putative elongation factor 1-alpha-like 3	5.83499e+08	2.47101e+08	4.153e+08	0.00170214	0.00214988	0.00192601	0.000223874	96
P63220	P63220	RPS21	40S ribosomal protein S21	7.36651e+08	1.94679e+08	4.65665e+08	0.0021489	0.0016938	0.00192135	0.000227551	97
P62906	P62906	RPL10A	60S ribosomal protein L10a	7.20814e+08	1.97499e+08	4.59157e+08	0.0021027	0.00171833	0.00191051	0.000192185	98
P62263	P62263	RPS14	40S ribosomal protein S14	5.23462e+08	2.59625e+08	3.91543e+08	0.001527	0.00225885	0.00189293	0.000365928	99
P27824-2	P27824	CANX	Isoform 2 of Calnexin	7.0134e+08	1.98251e+08	4.49796e+08	0.00204589	0.00172487	0.00188538	0.00016051	100
P18621-3	P18621	RPL17	Isoform 3 of 60S ribosomal protein L17	7.45209e+08	1.79118e+08	4.62163e+08	0.00217386	0.0015584	0.00186613	0.00030773	101
P42677	P42677	RPS27	40S ribosomal protein S27	7.78554e+08	1.66366e+08	4.7246e+08	0.00227113	0.00144746	0.0018593	0.000411837	102
P06733	P06733	ENO1	Alpha-enolase	9.26585e+08	1.16353e+08	5.21469e+08	0.00270296	0.00101232	0.00185764	0.000845316	103
P17661	P17661	DES	Desmin	6.93794e+08	1.93675e+08	4.43735e+08	0.00202388	0.00168506	0.00185447	0.000169409	104
Q15907	Q15907	RAB11B	Ras-related protein Rab-11B	4.74828e+08	2.65646e+08	3.70237e+08	0.00138513	0.00231124	0.00184818	0.000463054	105
P46783	P46783	RPS10	40S ribosomal protein S10	5.02872e+08	2.53944e+08	3.78408e+08	0.00146694	0.00220942	0.00183818	0.000371244	106
P45880-1	P45880	VDAC2	Isoform 1 of Voltage-dependent anion-selective channel protein 2	6.73295e+08	1.91778e+08	4.32537e+08	0.00196408	0.00166856	0.00181632	0.000147762	107
P10606	P10606	COX5B	Cytochrome c oxidase subunit 5B, mitochondrial	5.49169e+08	2.31793e+08	3.90481e+08	0.00160199	0.00201671	0.00180935	0.000207357	108
Q02878	Q02878	RPL6	60S ribosomal protein L6	7.12894e+08	1.76478e+08	4.44686e+08	0.0020796	0.00153544	0.00180752	0.000272081	109
Q96AG4	Q96AG4	LRRC59	Leucine-rich repeat-containing protein 59	5.99409e+08	2.12248e+08	4.05828e+08	0.00174855	0.00184665	0.0017976	4.9051e-05	110
P08865	P08865	RPSA	40S ribosomal protein SA	6.06822e+08	2.07217e+08	4.07019e+08	0.00177017	0.00180288	0.00178653	1.6355e-05	111
P62910	P62910	RPL32	60S ribosomal protein L32	6.48632e+08	1.91369e+08	4.2e+08	0.00189214	0.00166499	0.00177856	0.000113572	112
P14618	P14618	PKM	Pyruvate kinase PKM	5.95646e+08	2.07693e+08	4.0167e+08	0.00173757	0.00180702	0.0017723	3.47259e-05	113
P14314-2	P14314	PRKCSH	Isoform 2 of Glucosidase 2 subunit beta	6.02499e+08	1.99782e+08	4.01141e+08	0.00175756	0.00173819	0.00174788	9.68512e-06	114
P99999	P99999	CYCS	Cytochrome c	7.41357e+08	1.52328e+08	4.46842e+08	0.00216263	0.00132532	0.00174397	0.000418653	115
P46776	P46776	RPL27A	60S ribosomal protein L27a	6.32722e+08	1.83715e+08	4.08219e+08	0.00184573	0.0015984	0.00172206	0.000123662	116
P26447	P26447	S100A4	Protein S100-A4	3.5095e+08	2.77721e+08	3.14335e+08	0.00102376	0.00241629	0.00172003	0.000696265	117
P55072	P55072	VCP	Transitional endoplasmic reticulum ATPase	6.85655e+08	1.57952e+08	4.21804e+08	0.00200014	0.00137425	0.0016872	0.000312941	118
Q9BQE3	Q9BQE3	TUBA1C	Tubulin alpha-1C chain	5.23055e+08	2.11149e+08	3.67102e+08	0.00152581	0.00183709	0.00168145	0.000155638	119
Q13509	Q13509	TUBB3	Tubulin beta-3 chain	6.14094e+08	1.79761e+08	3.96928e+08	0.00179139	0.001564	0.00167769	0.000113694	120
Q00325-2	Q00325	SLC25A3	Isoform B of Phosphate carrier protein, mitochondrial	5.9448e+08	1.8491e+08	3.89695e+08	0.00173417	0.0016088	0.00167148	6.2684e-05	121
P07900-2	P07900	HSP90AA1	Isoform 2 of Heat shock protein HSP 90-alpha	8.06824e+08	1.1137e+08	4.59097e+08	0.0023536	0.00096897	0.00166129	0.000692316	122
Q02543	Q02543	RPL18A	60S ribosomal protein L18a	4.96642e+08	2.08551e+08	3.52596e+08	0.00144876	0.00181448	0.00163162	0.00018286	123
P67936-2	P67936	TPM4	Isoform 2 of Tropomyosin alpha-4 chain	2.31701e+08	2.9705e+08	2.64376e+08	0.000675899	0.00258447	0.00163018	0.000954285	124
Q01995	Q01995	TAGLN	Transgelin	1.03326e+08	3.39004e+08	2.21165e+08	0.000301413	0.00294949	0.00162545	0.00132404	125
O43852-4	O43852	CALU	Isoform 4 of Calumenin	5.79359e+08	1.77665e+08	3.78512e+08	0.00169006	0.00154577	0.00161791	7.2145e-05	126
Q00839	Q00839	HNRNPU	Heterogeneous nuclear ribonucleoprotein U	6.76567e+08	1.44684e+08	4.10625e+08	0.00197362	0.00125881	0.00161622	0.000357406	127
P84103	P84103	SRSF3	Serine/arginine-rich splicing factor 3	7.05714e+08	1.3108e+08	4.18397e+08	0.00205865	0.00114045	0.00159955	0.000459099	128
P05141	P05141	SLC25A5	ADP/ATP translocase 2	5.41165e+08	1.85408e+08	3.63286e+08	0.00157864	0.00161313	0.00159589	1.7244e-05	129
P09651	P09651	HNRNPA1	Heterogeneous nuclear ribonucleoprotein A1	7.43607e+08	1.15521e+08	4.29564e+08	0.00216919	0.00100508	0.00158714	0.000582055	130
P60866-2	P60866	RPS20	Isoform 2 of 40S ribosomal protein S20	6.15723e+08	1.57572e+08	3.86647e+08	0.00179614	0.00137094	0.00158354	0.000212596	131
P62913	P62913	RPL11	60S ribosomal protein L11	5.07319e+08	1.91593e+08	3.49456e+08	0.00147991	0.00166694	0.00157343	9.35166e-05	132
P55145	P55145	MANF	Mesencephalic astrocyte-derived neurotrophic factor	5.3749e+08	1.81104e+08	3.59297e+08	0.00156792	0.00157569	0.0015718	3.88248e-06	133
P09429	P09429	HMGB1	High mobility group protein B1	6.56643e+08	1.37447e+08	3.97045e+08	0.00191551	0.00119585	0.00155568	0.00035983	134
P12235	P12235	SLC25A4	ADP/ATP translocase 1	2.85392e+08	2.6191e+08	2.73651e+08	0.000832521	0.00227873	0.00155563	0.000723107	135
Q06830	Q06830	PRDX1	Peroxiredoxin-1	7.71436e+08	9.69561e+07	4.34196e+08	0.00225037	0.000843561	0.00154697	0.000703405	136
P52272	P52272	HNRNPM	Heterogeneous nuclear ribonucleoprotein M	4.88641e+08	1.90312e+08	3.39477e+08	0.00142542	0.0016558	0.00154061	0.000115189	137
P62258	P62258	YWHAE	14-3-3 protein epsilon	5.73249e+08	1.60173e+08	3.66711e+08	0.00167224	0.00139358	0.00153291	0.00013933	138
Q07065	Q07065	CKAP4	Cytoskeleton-associated protein 4	5.17229e+08	1.75305e+08	3.46267e+08	0.00150882	0.00152523	0.00151703	8.20705e-06	139
P06753-2	P06753	TPM3	Isoform 2 of Tropomyosin alpha-3 chain	4.00958e+08	2.1424e+08	3.07599e+08	0.00116964	0.00186398	0.00151681	0.000347169	140
P62081	P62081	RPS7	40S ribosomal protein S7	4.46753e+08	1.92102e+08	3.19427e+08	0.00130323	0.00167137	0.0014873	0.000184069	141
P61978-3	P61978	HNRNPK	Isoform 3 of Heterogeneous nuclear ribonucleoprotein K	5.56577e+08	1.53203e+08	3.5489e+08	0.0016236	0.00133293	0.00147827	0.000145333	142
P62701	P62701	RPS4X	40S ribosomal protein S4, X isoform	3.74642e+08	2.11014e+08	2.92828e+08	0.00109288	0.00183591	0.00146439	0.000371519	143
P60174	P60174	TPI1	Triosephosphate isomerase	6.01157e+08	1.34908e+08	3.68032e+08	0.00175365	0.00117376	0.0014637	0.000289945	144
O14950	O14950	MYL12B	Myosin regulatory light chain 12B	3.62939e+08	2.13683e+08	2.88311e+08	0.00105874	0.00185913	0.00145893	0.000400199	145
P61313	P61313	RPL15	60S ribosomal protein L15	4.75424e+08	1.72986e+08	3.24205e+08	0.00138687	0.00150505	0.00144596	5.90921e-05	146
P35232	P35232	PHB	Prohibitin	5.02123e+08	1.59406e+08	3.30764e+08	0.00146475	0.00138691	0.00142583	3.89222e-05	147
P13667	P13667	PDIA4	Protein disulfide-isomerase A4	5.66271e+08	1.31294e+08	3.48783e+08	0.00165188	0.00114232	0.0013971	0.000254782	148
P06576	P06576	ATP5B	ATP synthase subunit beta, mitochondrial	5.48813e+08	1.33642e+08	3.41227e+08	0.00160095	0.00116275	0.00138185	0.000219103	149
O00483	O00483	NDUFA4	Cytochrome c oxidase subunit NDUFA4	6.35768e+08	9.73257e+07	3.66547e+08	0.00185461	0.000846777	0.00135069	0.000503917	150
P50914	P50914	RPL14	60S ribosomal protein L14	3.77239e+08	1.83332e+08	2.80285e+08	0.00110045	0.00159507	0.00134776	0.000247311	151
P62854	P62854	RPS26	40S ribosomal protein S26	4.21712e+08	1.66058e+08	2.93885e+08	0.00123018	0.00144478	0.00133748	0.000107299	152
P21333	P21333	FLNA	Filamin-A	2.41925e+08	2.25845e+08	2.33885e+08	0.000705724	0.00196495	0.00133534	0.000629615	153
Q99584	Q99584	S100A13	Protein S100-A13	4.24474e+08	1.61452e+08	2.92963e+08	0.00123824	0.0014047	0.00132147	8.32313e-05	154
Q9UII2	Q9UII2	ATPIF1	ATPase inhibitor, mitochondrial	5.27114e+08	1.23434e+08	3.25274e+08	0.00153766	0.00107393	0.00130579	0.000231862	155
P09669	P09669	COX6C	Cytochrome c oxidase subunit 6C	2.7216e+08	2.07833e+08	2.39996e+08	0.000793923	0.00180824	0.00130108	0.000507157	156
P84098	P84098	RPL19	60S ribosomal protein L19	4.58046e+08	1.42055e+08	3.0005e+08	0.00133618	0.00123594	0.00128606	5.01186e-05	157
P07858	P07858	CTSB	Cathepsin B	5.28667e+08	1.16967e+08	3.22817e+08	0.00154218	0.00101766	0.00127992	0.000262261	158
Q13162	Q13162	PRDX4	Peroxiredoxin-4	5.20732e+08	1.19117e+08	3.19924e+08	0.00151904	0.00103637	0.0012777	0.000241336	159
Q969G5	Q969G5	PRKCDBP	Protein kinase C delta-binding protein	3.54383e+08	1.7408e+08	2.64232e+08	0.00103378	0.00151458	0.00127418	0.0002404	160
Q99623	Q99623	PHB2	Prohibitin-2	3.50475e+08	1.72805e+08	2.6164e+08	0.00102238	0.00150348	0.00126293	0.000240553	161
P09936	P09936	UCHL1	Ubiquitin carboxyl-terminal hydrolase isozyme L1	4.93745e+08	1.17235e+08	3.0549e+08	0.00144031	0.00102	0.00123015	0.000210158	162
P62273-2	P62273	RPS29	Isoform 2 of 40S ribosomal protein S29	4.62421e+08	1.26049e+08	2.94235e+08	0.00134894	0.00109668	0.00122281	0.000126127	163
P62899-2	P62899	RPL31	Isoform 2 of 60S ribosomal protein L31	2.49846e+08	1.97241e+08	2.23544e+08	0.000728831	0.00171609	0.00122246	0.000493628	164
P09496-2	P09496	CLTA	Isoform Non-brain of Clathrin light chain A	4.09516e+08	1.42542e+08	2.76029e+08	0.00119461	0.00124018	0.00121739	2.27854e-05	165
Q03135	Q03135	CAV1	Caveolin-1	2.50797e+08	1.94819e+08	2.22808e+08	0.000731606	0.00169501	0.00121331	0.000481702	166
P29401-2	P29401	TKT	Isoform 2 of Transketolase	4.9106e+08	1.13934e+08	3.02497e+08	0.00143248	0.00099128	0.00121188	0.0002206	167
P0DMV9	P0DMV9	HSPA1B	Heat shock 70 kDa protein 1B	5.22188e+08	9.83183e+07	3.10253e+08	0.00152328	0.000855413	0.00118935	0.000333935	168
P12814-3	P12814	ACTN1	Isoform 3 of Alpha-actinin-1	2.66988e+08	1.83552e+08	2.2527e+08	0.000778835	0.00159698	0.00118791	0.000409072	169
P00338-3	P00338	LDHA	Isoform 3 of L-lactate dehydrogenase A chain	4.21024e+08	1.30449e+08	2.75737e+08	0.00122818	0.00113497	0.00118157	4.66049e-05	170
P41219-2	P41219	PRPH	Isoform 2 of Peripherin	4.8622e+08	1.07549e+08	2.96884e+08	0.00141836	0.000935721	0.00117704	0.000241319	171
P62891	P62891	RPL39	60S ribosomal protein L39	6.32773e+08	5.77049e+07	3.45239e+08	0.00184587	0.000502059	0.00117397	0.000671908	172
Q6FI13	Q6FI13	HIST2H2AA3	Histone H2A type 2-A	3.96704e+08		3.96704e+08	0.00115723		0.00115723		173
P31943	P31943	HNRNPH1	Heterogeneous nuclear ribonucleoprotein H	4.71177e+08	1.05517e+08	2.88347e+08	0.00137448	0.000918049	0.00114626	0.000228215	174
P21796	P21796	VDAC1	Voltage-dependent anion-selective channel protein 1	4.19346e+08	1.21191e+08	2.70269e+08	0.00122328	0.00105442	0.00113885	8.44337e-05	175
P16402	P16402	HIST1H1D	Histone H1.3	3.92877e+08	1.28359e+08	2.60618e+08	0.00114607	0.00111678	0.00113143	1.46428e-05	176
P46782	P46782	RPS5	40S ribosomal protein S5	2.81888e+08	1.64588e+08	2.23238e+08	0.000822302	0.00143199	0.00112715	0.000304843	177
P37837	P37837	TALDO1	Transaldolase	4.39439e+08	1.0663e+08	2.73034e+08	0.00128189	0.000927726	0.00110481	0.000177084	178
P61513	P61513	RPL37A	60S ribosomal protein L37a	3.87807e+08	1.19326e+08	2.53566e+08	0.00113128	0.00103819	0.00108473	4.65461e-05	179
Q969Q0	Q969Q0	RPL36AL	60S ribosomal protein L36a-like	3.68452e+08	1.22902e+08	2.45677e+08	0.00107482	0.0010693	0.00107206	2.75903e-06	180
P51149	P51149	RAB7A	Ras-related protein Rab-7a	4.81143e+08	8.50752e+07	2.83109e+08	0.00140355	0.000740192	0.00107187	0.000331679	181
P35579	P35579	MYH9	Myosin-9	2.18185e+08	1.70645e+08	1.94415e+08	0.000636471	0.00148469	0.00106058	0.00042411	182
Q9H299	Q9H299	SH3BGRL3	SH3 domain-binding glutamic acid-rich-like protein 3	2.99724e+08	1.43146e+08	2.21435e+08	0.00087433	0.00124543	0.00105988	0.000185551	183
Q15084-2	Q15084	PDIA6	Isoform 2 of Protein disulfide-isomerase A6	3.3491e+08	1.28659e+08	2.31785e+08	0.000976973	0.00111939	0.00104818	7.12093e-05	184
Q9P0L0-2	Q9P0L0	VAPA	Isoform 2 of Vesicle-associated membrane protein-associated protein A	4.66008e+08	8.39022e+07	2.74955e+08	0.0013594	0.000729986	0.00104469	0.000314707	185
P62826	P62826	RAN	GTP-binding nuclear protein Ran	4.38531e+08	9.3106e+07	2.65819e+08	0.00127925	0.000810064	0.00104466	0.000234592	186
P04792	P04792	HSPB1	Heat shock protein beta-1	1.97182e+08	1.72954e+08	1.85068e+08	0.000575202	0.00150478	0.00103999	0.000464788	187
P26641-2	P26641	EEF1G	Isoform 2 of Elongation factor 1-gamma	3.0096e+08	1.38103e+08	2.19531e+08	0.000877935	0.00120156	0.00103975	0.000161811	188
P04075-2	P04075	ALDOA	Isoform 2 of Fructose-bisphosphate aldolase A	3.72556e+08	1.11302e+08	2.41929e+08	0.00108679	0.000968375	0.00102758	5.92077e-05	189
Q15233	Q15233	NONO	Non-POU domain-containing octamer-binding protein	3.18979e+08	1.28247e+08	2.23613e+08	0.0009305	0.0011158	0.00102315	9.26507e-05	190
P24534	P24534	EEF1B2	Elongation factor 1-beta	3.7495e+08	1.07111e+08	2.41031e+08	0.00109377	0.000931913	0.00101284	8.09303e-05	191
Q14240-2	Q14240	EIF4A2	Isoform 2 of Eukaryotic initiation factor 4A-II	3.97913e+08	9.55433e+07	2.46728e+08	0.00116076	0.000831269	0.000996014	0.000164745	192
P20674	P20674	COX5A	Cytochrome c oxidase subunit 5A, mitochondrial	3.63335e+08	1.05214e+08	2.34275e+08	0.00105989	0.000915411	0.000987651	7.22397e-05	193
Q07666	Q07666	KHDRBS1	KH domain-containing, RNA-binding, signal transduction-associated protein 1	3.30021e+08	1.13643e+08	2.21832e+08	0.000962711	0.000988747	0.000975729	1.30181e-05	194
P62158	P62158	CALM1	Calmodulin	2.99769e+08	1.23016e+08	2.11392e+08	0.000874462	0.00107029	0.000972377	9.79157e-05	195
Q13838-2	Q13838	DDX39B	Isoform 2 of Spliceosome RNA helicase DDX39B	3.23811e+08	1.12898e+08	2.18354e+08	0.000944594	0.000982263	0.000963428	1.88344e-05	196
O75947	O75947	ATP5H	ATP synthase subunit d, mitochondrial	3.90757e+08	8.9816e+07	2.40287e+08	0.00113988	0.000781439	0.000960662	0.000179223	197
P13639	P13639	EEF2	Elongation factor 2	3.3129e+08	1.03884e+08	2.17587e+08	0.000966412	0.00090384	0.000935126	3.1286e-05	198
P11940	P11940	PABPC1	Polyadenylate-binding protein 1	3.78313e+08	8.63867e+07	2.3235e+08	0.00110358	0.000751603	0.000927593	0.00017599	199
P00505	P00505	GOT2	Aspartate aminotransferase, mitochondrial	3.48994e+08	9.54165e+07	2.22205e+08	0.00101806	0.000830166	0.000924111	9.39458e-05	200
P60660-2	P60660	MYL6	Isoform Smooth muscle of Myosin light polypeptide 6	3.0358e+08	1.10489e+08	2.07035e+08	0.000885579	0.000961306	0.000923442	3.78635e-05	201
Q13263	Q13263	TRIM28	Transcription intermediary factor 1-beta	3.54849e+08	9.17142e+07	2.23281e+08	0.00103514	0.000797954	0.000916545	0.000118591	202
P04843	P04843	RPN1	Dolichyl-diphosphooligosaccharide--protein glycosyltransferase subunit 1	3.18467e+08	1.03005e+08	2.10736e+08	0.000929005	0.000896185	0.000912595	1.64097e-05	203
Q5VTU8	Q5VTU8	ATP5EP2	ATP synthase subunit epsilon-like protein, mitochondrial	2.93265e+08	1.1044e+08	2.01852e+08	0.000855487	0.000960873	0.00090818	5.26929e-05	204
Q07955	Q07955	SRSF1	Serine/arginine-rich splicing factor 1	3.38151e+08	9.32311e+07	2.15691e+08	0.000986427	0.000811152	0.000898789	8.76375e-05	205
P47914	P47914	RPL29	60S ribosomal protein L29	3.30765e+08	9.45706e+07	2.12668e+08	0.00096488	0.000822807	0.000893843	7.10366e-05	206
P09493-3	P09493	TPM1	Isoform 3 of Tropomyosin alpha-1 chain	6.03707e+07	1.83874e+08	1.22122e+08	0.000176108	0.00159979	0.000887948	0.00071184	207
Q01105	Q01105	SET	Protein SET	4.0527e+08	6.70837e+07	2.36177e+08	0.00118222	0.000583658	0.000882939	0.000299281	208
P07305	P07305	H1F0	Histone H1.0	1.89346e+08	1.39317e+08	1.64332e+08	0.000552344	0.00121212	0.000882233	0.000329889	209
P63241-2	P63241	EIF5A	Isoform 2 of Eukaryotic translation initiation factor 5A-1	2.71804e+08	1.09227e+08	1.90515e+08	0.000792883	0.00095032	0.000871601	7.87183e-05	210
P22392-2	P22392	NME2	Isoform 3 of Nucleoside diphosphate kinase B	3.60182e+08	7.66973e+07	2.1844e+08	0.00105069	0.0006673	0.000858997	0.000191697	211
Q14696	Q14696	MESDC2	LDLR chaperone MESD	2.52648e+08	1.12342e+08	1.82495e+08	0.000737005	0.000977425	0.000857215	0.00012021	212
Q15366-2	Q15366	PCBP2	Isoform 2 of Poly(rC)-binding protein 2	3.11416e+08	9.17974e+07	2.01607e+08	0.000908438	0.000798678	0.000853558	5.48799e-05	213
P38919	P38919	EIF4A3	Eukaryotic initiation factor 4A-III	2.37253e+08	1.1522e+08	1.76236e+08	0.000692094	0.00100246	0.000847279	0.000155185	214
P06396-3	P06396	GSN	Isoform 3 of Gelsolin	2.13454e+08	1.2221e+08	1.67832e+08	0.00062267	0.00106328	0.000842976	0.000220307	215
Q9UMS4	Q9UMS4	PRPF19	Pre-mRNA-processing factor 19	2.90441e+08	9.63173e+07	1.93379e+08	0.000847251	0.000838003	0.000842627	4.62405e-06	216
O75531	O75531	BANF1	Barrier-to-autointegration factor	2.26633e+08	1.16579e+08	1.71606e+08	0.000661115	0.00101429	0.000837702	0.000176588	217
Q00765	Q00765	REEP5	Receptor expression-enhancing protein 5	3.02906e+08	8.86796e+07	1.95793e+08	0.000883613	0.000771552	0.000827583	5.60309e-05	218
Q12906-7	Q12906	ILF3	Isoform 7 of Interleukin enhancer-binding factor 3	2.88952e+08	9.15477e+07	1.9025e+08	0.000842906	0.000796506	0.000819706	2.32e-05	219
P55084	P55084	HADHB	Trifunctional enzyme subunit beta, mitochondrial	2.97049e+08	8.8714e+07	1.92881e+08	0.000866526	0.000771852	0.000819189	4.73374e-05	220
P07602-3	P07602	PSAP	Isoform Sap-mu-9 of Prosaposin	2.85317e+08	9.16183e+07	1.88468e+08	0.000832303	0.00079712	0.000814711	1.75913e-05	221
O75915	O75915	ARL6IP5	PRA1 family protein 3	1.49206e+08	1.37191e+08	1.43198e+08	0.00043525	0.00119362	0.000814437	0.000379187	222
P12956	P12956	XRCC6	X-ray repair cross-complementing protein 6	3.0205e+08	8.48869e+07	1.93468e+08	0.000881115	0.000738554	0.000809834	7.12805e-05	223
P09211	P09211	GSTP1	Glutathione S-transferase P	2.79505e+08	9.03756e+07	1.8494e+08	0.000815349	0.000786308	0.000800828	1.45206e-05	224
Q9H0C2	Q9H0C2	SLC25A31	ADP/ATP translocase 4	2.04103e+08	1.15368e+08	1.59735e+08	0.000595392	0.00100375	0.000799573	0.00020418	225
Q05682	Q05682	CALD1	Caldesmon	1.49566e+08	1.33e+08	1.41283e+08	0.0004363	0.00115716	0.000796732	0.000360431	226
P23246	P23246	SFPQ	Splicing factor, proline- and glutamine-rich	2.46573e+08	9.96963e+07	1.73135e+08	0.000719282	0.000867402	0.000793342	7.40599e-05	227
Q15149	Q15149	PLEC	Plectin	2.50984e+08	9.78365e+07	1.7441e+08	0.00073215	0.000851221	0.000791685	5.95358e-05	228
P36542	P36542	ATP5C1	ATP synthase subunit gamma, mitochondrial	3.12608e+08	7.71174e+07	1.94863e+08	0.000911915	0.000670955	0.000791435	0.00012048	229
Q14847	Q14847	LASP1	LIM and SH3 domain protein 1	1.67345e+08	1.2572e+08	1.46533e+08	0.000488166	0.00109382	0.000790994	0.000302828	230
P37802-2	P37802	TAGLN2	Isoform 2 of Transgelin-2	9.2325e+07	1.50513e+08	1.21419e+08	0.000269323	0.00130953	0.000789426	0.000520104	231
P14174	P14174	MIF	Macrophage migration inhibitory factor	2.04715e+08	1.12391e+08	1.58553e+08	0.000597177	0.000977848	0.000787513	0.000190335	232
Q15293	Q15293	RCN1	Reticulocalbin-1	2.6833e+08	9.00145e+07	1.79172e+08	0.00078275	0.000783166	0.000782958	2.08097e-07	233
P62820	P62820	RAB1A	Ras-related protein Rab-1A	2.14546e+08	1.07536e+08	1.61041e+08	0.000625857	0.000935614	0.000780735	0.000154879	234
P13010	P13010	XRCC5	X-ray repair cross-complementing protein 5	2.51208e+08	9.49835e+07	1.73096e+08	0.000732803	0.000826398	0.000779601	4.67976e-05	235
Q8NBS9	Q8NBS9	TXNDC5	Thioredoxin domain-containing protein 5	2.74318e+08	8.69087e+07	1.80613e+08	0.000800218	0.000756144	0.000778181	2.2037e-05	236
P05114	P05114	HMGN1	Non-histone chromosomal protein HMG-14	1.70709e+08	1.19468e+08	1.45089e+08	0.000497979	0.00103943	0.000768703	0.000270724	237
P17931	P17931	LGALS3	Galectin-3	1.53819e+08	1.23938e+08	1.38879e+08	0.000448709	0.00107832	0.000763514	0.000314805	238
P30048	P30048	PRDX3	Thioredoxin-dependent peroxide reductase, mitochondrial	4.12355e+08	3.69443e+07	2.2465e+08	0.00120289	0.000321432	0.00076216	0.000440729	239
P12004	P12004	PCNA	Proliferating cell nuclear antigen	2.25061e+08	9.92236e+07	1.62142e+08	0.000656529	0.00086329	0.000759909	0.000103381	240
P52926	P52926	HMGA2	High mobility group protein HMGI-C	3.88196e+08	4.42172e+07	2.16207e+08	0.00113241	0.000384709	0.000758561	0.000373852	241
P13693	P13693	TPT1	Translationally-controlled tumor protein	3.58581e+08	5.34134e+07	2.05997e+08	0.00104602	0.00046472	0.000755372	0.000290652	242
P61224	P61224	RAP1B	Ras-related protein Rap-1b	3.17528e+08	6.71077e+07	1.92318e+08	0.000926266	0.000583867	0.000755067	0.0001712	243
P51572-2	P51572	BCAP31	Isoform 2 of B-cell receptor-associated protein 31	2.6035e+08	8.61006e+07	1.73225e+08	0.000759472	0.000749114	0.000754293	5.17934e-06	244
P39656	P39656	DDOST	Dolichyl-diphosphooligosaccharide--protein glycosyltransferase 48 kDa subunit	2.90364e+08	7.58941e+07	1.83129e+08	0.000847026	0.000660312	0.000753669	9.33567e-05	245
Q96AY3	Q96AY3	FKBP10	Peptidyl-prolyl cis-trans isomerase FKBP10	3.52705e+08	5.48267e+07	2.03766e+08	0.00102888	0.000477017	0.00075295	0.000275933	246
P48735	P48735	IDH2	Isocitrate dehydrogenase [NADP], mitochondrial	2.34384e+08	9.37454e+07	1.64065e+08	0.000683726	0.000815626	0.000749676	6.595e-05	247
Q14103	Q14103	HNRNPD	Heterogeneous nuclear ribonucleoprotein D0	2.90984e+08	7.40633e+07	1.82524e+08	0.000848834	0.000644383	0.000746609	0.000102225	248
P21926	P21926	CD9	CD9 antigen	2.08414e+08	1.00936e+08	1.54675e+08	0.000607969	0.000878188	0.000743078	0.00013511	249
P62316	P62316	SNRPD2	Small nuclear ribonucleoprotein Sm D2	2.71377e+08	7.98257e+07	1.75601e+08	0.000791638	0.000694519	0.000743078	4.85593e-05	250
Q09666	Q09666	AHNAK	Neuroblast differentiation-associated protein AHNAK	2.29545e+08	9.35462e+07	1.61545e+08	0.000669609	0.000813893	0.000741751	7.21421e-05	251
P53999	P53999	SUB1	Activated RNA polymerase II transcriptional coactivator p15	4.05393e+08	3.25414e+07	2.18967e+08	0.00118258	0.000283124	0.000732851	0.000449727	252
P00441	P00441	SOD1	Superoxide dismutase [Cu-Zn]	3.11672e+08	6.34363e+07	1.87554e+08	0.000909185	0.000551924	0.000730554	0.000178631	253
P02795	P02795	MT2A	Metallothionein-2	2.30221e+08	9.037e+07	1.60295e+08	0.000671581	0.000786259	0.00072892	5.73387e-05	254
P00558	P00558	PGK1	Phosphoglycerate kinase 1	2.93354e+08	6.89853e+07	1.8117e+08	0.000855749	0.000600202	0.000727976	0.000127773	255
O00571	O00571	DDX3X	ATP-dependent RNA helicase DDX3X	2.72771e+08	7.48017e+07	1.73787e+08	0.000795706	0.000650808	0.000723257	7.2449e-05	256
P09234	P09234	SNRPC	U1 small nuclear ribonucleoprotein C	4.07043e+08	2.90205e+07	2.18032e+08	0.00118739	0.000252491	0.000719942	0.000467451	257
P61006	P61006	RAB8A	Ras-related protein Rab-8A	2.36583e+08	8.49949e+07	1.60789e+08	0.000690142	0.000739493	0.000714817	2.46758e-05	258
P22090	P22090	RPS4Y1	40S ribosomal protein S4, Y isoform 1	2.24714e+08	8.80599e+07	1.56387e+08	0.000655517	0.00076616	0.000710838	5.53218e-05	259
P32119	P32119	PRDX2	Peroxiredoxin-2	2.24991e+08	8.63e+07	1.55646e+08	0.000656326	0.000750848	0.000703587	4.72612e-05	260
P05556	P05556	ITGB1	Integrin beta-1	2.20648e+08	8.66552e+07	1.53652e+08	0.000643656	0.000753938	0.000698797	5.51413e-05	261
O43390	O43390	HNRNPR	Heterogeneous nuclear ribonucleoprotein R	2.05773e+08	9.03135e+07	1.48043e+08	0.000600265	0.000785768	0.000693016	9.27516e-05	262
O14979	O14979	HNRNPDL	Heterogeneous nuclear ribonucleoprotein D-like	2.35028e+08	8.00134e+07	1.57521e+08	0.000685604	0.000696152	0.000690878	5.274e-06	263
P08238	P08238	HSP90AB1	Heat shock protein HSP 90-beta	3.19252e+08	5.08623e+07	1.85057e+08	0.000931294	0.000442524	0.000686909	0.000244385	264
Q14697-2	Q14697	GANAB	Isoform 2 of Neutral alpha-glucosidase AB	1.80663e+08	9.72157e+07	1.38939e+08	0.000527015	0.00084582	0.000686417	0.000159403	265
Q7KZF4	Q7KZF4	SND1	Staphylococcal nuclease domain-containing protein 1	2.39517e+08	7.71773e+07	1.58347e+08	0.000698699	0.000671476	0.000685088	1.36111e-05	266
P61927	P61927	RPL37	60S ribosomal protein L37	1.97256e+08	8.95634e+07	1.4341e+08	0.000575418	0.000779241	0.00067733	0.000101912	267
P61981	P61981	YWHAG	14-3-3 protein gamma	2.88238e+08	5.8454e+07	1.73346e+08	0.000840824	0.000508576	0.0006747	0.000166124	268
P26038	P26038	MSN	Moesin	2.13629e+08	8.31523e+07	1.48391e+08	0.000623182	0.000723462	0.000673322	5.014e-05	269
Q16629	Q16629	SRSF7	Serine/arginine-rich splicing factor 7	2.37444e+08	7.5057e+07	1.56251e+08	0.000692653	0.000653029	0.000672841	1.98121e-05	270
P60842	P60842	EIF4A1	Eukaryotic initiation factor 4A-I	2.47703e+08	7.1177e+07	1.5944e+08	0.000722579	0.000619272	0.000670925	5.16536e-05	271
P35241-5	P35241	RDX	Isoform 5 of Radixin	1.98335e+08	8.72735e+07	1.42804e+08	0.000578567	0.000759319	0.000668943	9.0376e-05	272
Q9Y281	Q9Y281	CFL2	Cofilin-2	1.83366e+08	9.13937e+07	1.3738e+08	0.0005349	0.000795166	0.000665033	0.000130133	273
P14866	P14866	HNRNPL	Heterogeneous nuclear ribonucleoprotein L	2.17277e+08	7.95582e+07	1.48418e+08	0.000633823	0.000692192	0.000663008	2.91842e-05	274
P68371	P68371	TUBB4B	Tubulin beta-4B chain	2.25991e+08	7.65255e+07	1.51258e+08	0.000659243	0.000665806	0.000662525	3.28117e-06	275
P62979	P62979	RPS27A	Ubiquitin-40S ribosomal protein S27a	2.59633e+08	6.43093e+07	1.61971e+08	0.00075738	0.00055952	0.00065845	9.89299e-05	276
Q9GZT3	Q9GZT3	SLIRP	SRA stem-loop-interacting RNA-binding protein, mitochondrial	2.88723e+08	5.39719e+07	1.71347e+08	0.000842238	0.00046958	0.000655909	0.000186329	277
O15173-2	O15173	PGRMC2	Isoform 2 of Membrane-associated progesterone receptor component 2	2.80773e+08	5.65633e+07	1.68668e+08	0.000819049	0.000492126	0.000655588	0.000163462	278
Q9BS26	Q9BS26	ERP44	Endoplasmic reticulum resident protein 44	2.10378e+08	7.96974e+07	1.45038e+08	0.000613699	0.000693402	0.000653551	3.98519e-05	279
P04216	P04216	THY1	Thy-1 membrane glycoprotein	2.16618e+08	7.74097e+07	1.47014e+08	0.000631901	0.000673499	0.0006527	2.07987e-05	280
O75396	O75396	SEC22B	Vesicle-trafficking protein SEC22b	2.6555e+08	6.08895e+07	1.6322e+08	0.00077464	0.000529766	0.000652203	0.000122437	281
P10599	P10599	TXN	Thioredoxin	2.82306e+08	5.39628e+07	1.68134e+08	0.000823519	0.000469501	0.00064651	0.000177009	282
P63000-2	P63000	RAC1	Isoform B of Ras-related C3 botulinum toxin substrate 1	2.08675e+08	7.84759e+07	1.43575e+08	0.000608729	0.000682775	0.000645752	3.70231e-05	283
P62306	P62306	SNRPF	Small nuclear ribonucleoprotein F	2.20398e+08	7.44554e+07	1.47427e+08	0.000642926	0.000647795	0.000645361	2.4346e-06	284
P83876	P83876	TXNL4A	Thioredoxin-like protein 4A	2.18559e+07	1.41019e+08	8.14373e+07	6.37562e-05	0.00122693	0.000645341	0.000581585	285
P00387-3	P00387	CYB5R3	Isoform 3 of NADH-cytochrome b5 reductase 3	1.94179e+08	8.29108e+07	1.38545e+08	0.000566443	0.000721361	0.000643902	7.74591e-05	286
P40939	P40939	HADHA	Trifunctional enzyme subunit alpha, mitochondrial	2.27511e+08	7.16319e+07	1.49571e+08	0.000663675	0.00062323	0.000643452	2.02228e-05	287
P30041	P30041	PRDX6	Peroxiredoxin-6	2.42948e+08	6.44024e+07	1.53675e+08	0.000708709	0.000560329	0.000634519	7.419e-05	288
P28066	P28066	PSMA5	Proteasome subunit alpha type-5	1.58664e+08	9.18989e+07	1.25281e+08	0.000462841	0.000799562	0.000631201	0.00016836	289
Q92945	Q92945	KHSRP	Far upstream element-binding protein 2	1.75116e+08	8.61039e+07	1.3061e+08	0.000510834	0.000749142	0.000629988	0.000119154	290
O75367	O75367	H2AFY	Core histone macro-H2A.1	2.21025e+08	7.04839e+07	1.45755e+08	0.000644757	0.000613241	0.000628999	1.5758e-05	291
Q15417	Q15417	CNN3	Calponin-3	1.149e+08	1.06038e+08	1.10469e+08	0.000335176	0.000922575	0.000628875	0.000293699	292
P17844	P17844	DDX5	Probable ATP-dependent RNA helicase DDX5	2.31307e+08	6.70079e+07	1.49158e+08	0.000674751	0.000582998	0.000628875	4.58764e-05	293
O14880	O14880	MGST3	Microsomal glutathione S-transferase 3	4.62316e+07	1.28777e+08	8.75042e+07	0.000134863	0.00112042	0.000627639	0.000492776	294
O75390	O75390	CS	Citrate synthase, mitochondrial	2.22782e+08	6.78257e+07	1.45304e+08	0.00064988	0.000590113	0.000619997	2.98834e-05	295
P30049	P30049	ATP5D	ATP synthase subunit delta, mitochondrial	2.21261e+08	6.8052e+07	1.44657e+08	0.000645446	0.000592083	0.000618764	2.66814e-05	296
P49411	P49411	TUFM	Elongation factor Tu, mitochondrial	1.94907e+08	7.60692e+07	1.35488e+08	0.000568566	0.000661836	0.000615201	4.66348e-05	297
P15144	P15144	ANPEP	Aminopeptidase N	2.21844e+08	6.63182e+07	1.44081e+08	0.000647144	0.000576998	0.000612071	3.50729e-05	298
P30040	P30040	ERP29	Endoplasmic reticulum resident protein 29	2.63457e+08	5.17705e+07	1.57614e+08	0.000768536	0.000450426	0.000609481	0.000159055	299
P13073	P13073	COX4I1	Cytochrome c oxidase subunit 4 isoform 1, mitochondrial	1.76539e+08	8.08383e+07	1.28689e+08	0.000514985	0.000703329	0.000609157	9.41724e-05	300
P09525	P09525	ANXA4	Annexin A4	2.27461e+08	6.31898e+07	1.45325e+08	0.000663529	0.000549779	0.000606654	5.68751e-05	301
P20290	P20290	BTF3	Transcription factor BTF3	2.39708e+08	5.86852e+07	1.49197e+08	0.000699257	0.000510587	0.000604922	9.4335e-05	302
P09012	P09012	SNRPA	U1 small nuclear ribonucleoprotein A	1.7855e+08	7.7865e+07	1.28207e+08	0.000520851	0.00067746	0.000599155	7.83048e-05	303
P25789	P25789	PSMA4	Proteasome subunit alpha type-4	1.47947e+08	8.77374e+07	1.17842e+08	0.00043158	0.000763354	0.000597467	0.000165887	304
Q9BVK6	Q9BVK6	TMED9	Transmembrane emp24 domain-containing protein 9	1.66685e+08	8.11308e+07	1.23908e+08	0.000486241	0.000705874	0.000596058	0.000109817	305
P16070	P16070	CD44	CD44 antigen	1.95119e+08	7.15615e+07	1.3334e+08	0.000569184	0.000622617	0.000595901	2.67162e-05	306
P14209	P14209	CD99	CD99 antigen	9.82908e+07	1.03955e+08	1.01123e+08	0.000286726	0.000904458	0.000595592	0.000308866	307
Q9Y3I0	Q9Y3I0	RTCB	tRNA-splicing ligase RtcB homolog	2.06591e+08	6.61918e+07	1.36392e+08	0.000602651	0.000575898	0.000589275	1.33764e-05	308
O95881	O95881	TXNDC12	Thioredoxin domain-containing protein 12	2.43775e+08	5.28812e+07	1.48328e+08	0.000711121	0.00046009	0.000585606	0.000125515	309
P49755	P49755	TMED10	Transmembrane emp24 domain-containing protein 10	1.94451e+08	6.91452e+07	1.31798e+08	0.000567237	0.000601594	0.000584416	1.71785e-05	310
O95758-4	O95758	PTBP3	Isoform 4 of Polypyrimidine tract-binding protein 3	1.99783e+08	6.4991e+07	1.32387e+08	0.000582789	0.00056545	0.00057412	8.6694e-06	311
P21291	P21291	CSRP1	Cysteine and glycine-rich protein 1	1.07142e+08	9.57296e+07	1.01436e+08	0.000312547	0.00083289	0.000572718	0.000260171	312
P48047	P48047	ATP5O	ATP synthase subunit O, mitochondrial	1.87555e+08	6.86328e+07	1.28094e+08	0.00054712	0.000597136	0.000572128	2.50077e-05	313
O95302	O95302	FKBP9	Peptidyl-prolyl cis-trans isomerase FKBP9	1.64421e+08	7.63674e+07	1.20394e+08	0.000479636	0.00066443	0.000572033	9.23971e-05	314
P29692-2	P29692	EEF1D	Isoform 2 of Elongation factor 1-delta	2.34638e+08	5.24786e+07	1.43558e+08	0.000684465	0.000456587	0.000570526	0.000113939	315
P63167	P63167	DYNLL1	Dynein light chain 1, cytoplasmic	9.35488e+07	9.97167e+07	9.66327e+07	0.000272893	0.000867579	0.000570236	0.000297343	316
O43707	O43707	ACTN4	Alpha-actinin-4	1.45124e+08	8.19626e+07	1.13544e+08	0.000423345	0.000713111	0.000568228	0.000144883	317
P30084	P30084	ECHS1	Enoyl-CoA hydratase, mitochondrial	2.08767e+08	5.99563e+07	1.34362e+08	0.000608998	0.000521647	0.000565322	4.36754e-05	318
P45877	P45877	PPIC	Peptidyl-prolyl cis-trans isomerase C	1.17413e+08	9.043e+07	1.03921e+08	0.000342507	0.000786781	0.000564644	0.000222137	319
P14854	P14854	COX6B1	Cytochrome c oxidase subunit 6B1	1.50408e+08	7.75996e+07	1.14004e+08	0.000438758	0.000675151	0.000556954	0.000118197	320
P62304	P62304	SNRPE	Small nuclear ribonucleoprotein E	2.06823e+08	5.86081e+07	1.32715e+08	0.000603327	0.000509917	0.000556622	4.67051e-05	321
Q969M3-3	Q969M3	YIPF5	Isoform 3 of Protein YIPF5	4.11431e+07	1.13508e+08	7.73257e+07	0.000120019	0.000987573	0.000553796	0.000433777	322
P13674	P13674	P4HA1	Prolyl 4-hydroxylase subunit alpha-1	1.57351e+08	7.42522e+07	1.15801e+08	0.00045901	0.000646027	0.000552519	9.35085e-05	323
Q9NR12	Q9NR12	PDLIM7	PDZ and LIM domain protein 7	7.87918e+07	1.00239e+08	8.95154e+07	0.000229845	0.000872123	0.000550984	0.000321139	324
P61916	P61916	NPC2	Epididymal secretory protein E1	1.90609e+08	6.26396e+07	1.26625e+08	0.00055603	0.000544992	0.000550511	5.51918e-06	325
Q92841	Q92841	DDX17	Probable ATP-dependent RNA helicase DDX17	2.02141e+08	5.85885e+07	1.30365e+08	0.00058967	0.000509746	0.000549708	3.99617e-05	326
Q9UBI6	Q9UBI6	GNG12	Guanine nucleotide-binding protein G(I)/G(S)/G(O) subunit gamma-12	1.18854e+08	8.64832e+07	1.02669e+08	0.000346713	0.000752442	0.000549577	0.000202865	327
P12111	P12111	COL6A3	Collagen alpha-3(VI) chain	1.93213e+08	6.10551e+07	1.27134e+08	0.000563626	0.000531206	0.000547416	1.62098e-05	328
Q9UKM9	Q9UKM9	RALY	RNA-binding protein Raly	1.52007e+08	7.4105e+07	1.13056e+08	0.000443423	0.000644747	0.000544085	0.000100662	329
P60981	P60981	DSTN	Destrin	1.87906e+08	6.11414e+07	1.24524e+08	0.000548144	0.000531958	0.000540051	8.09328e-06	330
O00264	O00264	PGRMC1	Membrane-associated progesterone receptor component 1	8.58137e+07	9.51803e+07	9.0497e+07	0.000250329	0.000828111	0.00053922	0.000288891	331
P13987	P13987	CD59	CD59 glycoprotein	1.69463e+08	6.67723e+07	1.18117e+08	0.000494343	0.000580948	0.000537645	4.33029e-05	332
P30533	P30533	LRPAP1	Alpha-2-macroglobulin receptor-associated protein	1.86702e+08	6.07245e+07	1.23713e+08	0.000544632	0.00052833	0.000536481	8.15103e-06	333
P55769	P55769	SNU13	NHP2-like protein 1	1.26542e+08	8.07289e+07	1.03635e+08	0.000369137	0.000702377	0.000535757	0.00016662	334
Q9Y4L1	Q9Y4L1	HYOU1	Hypoxia up-regulated protein 1	1.61083e+08	6.8757e+07	1.1492e+08	0.000469897	0.000598216	0.000534057	6.41594e-05	335
P63104	P63104	YWHAZ	14-3-3 protein zeta/delta	1.93861e+08	5.74359e+07	1.25648e+08	0.000565515	0.000499718	0.000532616	3.28984e-05	336
Q92499	Q92499	DDX1	ATP-dependent RNA helicase DDX1	1.97638e+08	5.56352e+07	1.26636e+08	0.000576532	0.000484051	0.000530292	4.62404e-05	337
O75964	O75964	ATP5L	ATP synthase subunit g, mitochondrial	2.33555e+08	4.34016e+07	1.38478e+08	0.000681308	0.000377613	0.000529461	0.000151847	338
Q00610	Q00610	CLTC	Clathrin heavy chain 1	2.07045e+08	5.20938e+07	1.29569e+08	0.000603975	0.000453239	0.000528607	7.53677e-05	339
Q9Y6A9	Q9Y6A9	SPCS1	Signal peptidase complex subunit 1	2.86472e+08	2.45042e+07	1.55488e+08	0.000835672	0.000213198	0.000524435	0.000311237	340
P62995	P62995	TRA2B	Transformer-2 protein homolog beta	1.18661e+08	7.98445e+07	9.92526e+07	0.000346147	0.000694683	0.000520415	0.000174268	341
P51571	P51571	SSR4	Translocon-associated protein subunit delta	2.08094e+08	4.92761e+07	1.28685e+08	0.000607035	0.000428724	0.000517879	8.91555e-05	342
P18206	P18206	VCL	Vinculin	1.11503e+08	8.13229e+07	9.64127e+07	0.000325266	0.000707546	0.000516406	0.00019114	343
P16615	P16615	ATP2A2	Sarcoplasmic/endoplasmic reticulum calcium ATPase 2	1.50284e+08	6.80549e+07	1.0917e+08	0.000438397	0.000592108	0.000515253	7.68554e-05	344
Q03252	Q03252	LMNB2	Lamin-B2	1.25566e+08	7.60942e+07	1.0083e+08	0.00036629	0.000662053	0.000514172	0.000147882	345
O60493	O60493	SNX3	Sorting nexin-3	7.24414e+07	9.37476e+07	8.30945e+07	0.00021132	0.000815646	0.000513483	0.000302163	346
P50990	P50990	CCT8	T-complex protein 1 subunit theta	2.04511e+08	4.91846e+07	1.26848e+08	0.000596583	0.000427928	0.000512256	8.43276e-05	347
P22695	P22695	UQCRC2	Cytochrome b-c1 complex subunit 2, mitochondrial	1.78296e+08	5.77743e+07	1.18035e+08	0.000520111	0.000502662	0.000511386	8.7243e-06	348
Q8NC51	Q8NC51	SERBP1	Plasminogen activator inhibitor 1 RNA-binding protein	2.01852e+08	4.90873e+07	1.2547e+08	0.000588826	0.000427082	0.000507954	8.08721e-05	349
Q13310-3	Q13310	PABPC4	Isoform 3 of Polyadenylate-binding protein 4	1.75783e+08	5.73844e+07	1.16584e+08	0.00051278	0.000499269	0.000506025	6.75515e-06	350
P18859-2	P18859	ATP5J	Isoform 2 of ATP synthase-coupling factor 6, mitochondrial	2.09123e+08	4.45852e+07	1.26854e+08	0.000610036	0.000387911	0.000498973	0.000111063	351
P26599-3	P26599	PTBP1	Isoform 3 of Polypyrimidine tract-binding protein 1	1.50247e+08	6.43254e+07	1.07286e+08	0.000438287	0.000559659	0.000498973	6.06862e-05	352
P51911	P51911	CNN1	Calponin-1	9.71425e+07	8.21217e+07	8.96321e+07	0.000283376	0.000714496	0.000498936	0.00021556	353
P20073	P20073	ANXA7	Annexin A7	1.55988e+08	6.22786e+07	1.09133e+08	0.000455035	0.000541851	0.000498443	4.3408e-05	354
P37108	P37108	SRP14	Signal recognition particle 14 kDa protein	1.83619e+08	5.29616e+07	1.1829e+08	0.000535638	0.000460789	0.000498213	3.74245e-05	355
Q15717-2	Q15717	ELAVL1	Isoform 2 of ELAV-like protein 1	1.46833e+08	6.48667e+07	1.0585e+08	0.000428328	0.000564369	0.000496349	6.80208e-05	356
Q9H1E3	Q9H1E3	NUCKS1	Nuclear ubiquitous casein and cyclin-dependent kinase substrate 1	1.14181e+08	7.55021e+07	9.48413e+07	0.000333078	0.000656901	0.00049499	0.000161912	357
Q96K17	Q96K17	BTF3L4	Transcription factor BTF3 homolog 4	1.36482e+08	6.77699e+07	1.02126e+08	0.000398133	0.000589628	0.00049388	9.57474e-05	358
P25786-2	P25786	PSMA1	Isoform Long of Proteasome subunit alpha type-1	1.80659e+08	5.27861e+07	1.16723e+08	0.000527004	0.000459263	0.000493134	3.38708e-05	359
Q9H0S4	Q9H0S4	DDX47	Probable ATP-dependent RNA helicase DDX47	7.11289e+06	1.10953e+08	5.90327e+07	2.07491e-05	0.000965337	0.000493043	0.000472294	360
P0DN76	P0DN76	U2AF1L5	Splicing factor U2AF 35 kDa subunit-like protein	1.81646e+08	5.14596e+07	1.16553e+08	0.000529883	0.000447721	0.000488802	4.10809e-05	361
P16989	P16989	YBX3	Y-box-binding protein 3	1.67767e+08	5.60645e+07	1.11916e+08	0.000489396	0.000487786	0.000488591	8.04787e-07	362
O14818	O14818	PSMA7	Proteasome subunit alpha type-7	1.56201e+08	5.96549e+07	1.07928e+08	0.000455658	0.000519024	0.000487341	3.1683e-05	363
Q16891-4	Q16891	IMMT	Isoform 4 of MICOS complex subunit MIC60	1.61904e+08	5.70053e+07	1.09454e+08	0.000472292	0.000495971	0.000484132	1.18395e-05	364
Q9NQC3-2	Q9NQC3	RTN4	Isoform 2 of Reticulon-4	1.64457e+08	5.61114e+07	1.10284e+08	0.000479741	0.000488194	0.000483968	4.22639e-06	365
Q15363	Q15363	TMED2	Transmembrane emp24 domain-containing protein 2	9.31591e+07	7.99286e+07	8.65439e+07	0.000271756	0.000695414	0.000483585	0.000211829	366
P08134	P08134	RHOC	Rho-related GTP-binding protein RhoC	1.63871e+08	5.5575e+07	1.09723e+08	0.000478032	0.000483527	0.00048078	2.74782e-06	367
Q13642-4	Q13642	FHL1	Isoform 4 of Four and a half LIM domains protein 1	9.6418e+07	7.7968e+07	8.7193e+07	0.000281263	0.000678356	0.00047981	0.000198547	368
P05455	P05455	SSB	Lupus La protein	1.98498e+08	4.359e+07	1.21044e+08	0.000579042	0.000379252	0.000479147	9.98947e-05	369
P00367	P00367	GLUD1	Glutamate dehydrogenase 1, mitochondrial	1.73745e+08	5.17526e+07	1.12749e+08	0.000506835	0.000450271	0.000478553	2.82821e-05	370
Q04837	Q04837	SSBP1	Single-stranded DNA-binding protein, mitochondrial	2.05587e+08	4.10624e+07	1.23325e+08	0.000599723	0.000357261	0.000478492	0.000121231	371
P38159	P38159	RBMX	RNA-binding motif protein, X chromosome	1.23636e+08	6.79433e+07	9.57898e+07	0.000360662	0.000591137	0.000475899	0.000115237	372
P0C0S5	P0C0S5	H2AFZ	Histone H2A.Z	2.08955e+08	3.89363e+07	1.23946e+08	0.000609547	0.000338763	0.000474155	0.000135392	373
Q9UQ80	Q9UQ80	PA2G4	Proliferation-associated protein 2G4	1.91605e+08	4.46035e+07	1.18104e+08	0.000558934	0.00038807	0.000473502	8.54317e-05	374
P49368	P49368	CCT3	T-complex protein 1 subunit gamma	1.99299e+08	4.18623e+07	1.20581e+08	0.00058138	0.000364221	0.0004728	0.00010858	375
P06454	P06454	PTMA	Prothymosin alpha	1.61921e+08		1.61921e+08	0.000472344		0.000472344		376
P04181	P04181	OAT	Ornithine aminotransferase, mitochondrial	1.34857e+08	6.33568e+07	9.91067e+07	0.000393393	0.000551232	0.000472312	7.89198e-05	377
Q9Y277-2	Q9Y277	VDAC3	Isoform 2 of Voltage-dependent anion-selective channel protein 3	1.73483e+08	5.01902e+07	1.11837e+08	0.000506071	0.000436677	0.000471374	3.46968e-05	378
Q92688	Q92688	ANP32B	Acidic leucine-rich nuclear phosphoprotein 32 family member B	2.44876e+08	2.60779e+07	1.35477e+08	0.000714333	0.000226889	0.000470611	0.000243722	379
Q08170	Q08170	SRSF4	Serine/arginine-rich splicing factor 4	1.46599e+08	5.88238e+07	1.02712e+08	0.000427647	0.000511793	0.00046972	4.20728e-05	380
P34897	P34897	SHMT2	Serine hydroxymethyltransferase, mitochondrial	1.45735e+08	5.85138e+07	1.02124e+08	0.000425127	0.000509096	0.000467111	4.19846e-05	381
P04844	P04844	RPN2	Dolichyl-diphosphooligosaccharide--protein glycosyltransferase subunit 2	1.58112e+08	5.39476e+07	1.0603e+08	0.000461232	0.000469368	0.0004653	4.06823e-06	382
P25788	P25788	PSMA3	Proteasome subunit alpha type-3	1.89603e+08	4.25785e+07	1.16091e+08	0.000553094	0.000370452	0.000461773	9.13212e-05	383
P54709	P54709	ATP1B3	Sodium/potassium-transporting ATPase subunit beta-3	1.31268e+08	6.19414e+07	9.66047e+07	0.000382924	0.000538918	0.000460921	7.79969e-05	384
Q53GQ0	Q53GQ0	HSD17B12	Very-long-chain 3-oxoacyl-CoA reductase	1.40927e+08	5.85391e+07	9.97329e+07	0.0004111	0.000509316	0.000460208	4.91079e-05	385
P07195	P07195	LDHB	L-lactate dehydrogenase B chain	1.50109e+08	5.53947e+07	1.02752e+08	0.000437887	0.000481959	0.000459923	2.2036e-05	386
Q9P035	Q9P035	HACD3	Very-long-chain (3R)-3-hydroxyacyl-CoA dehydratase 3	9.97234e+07	7.21778e+07	8.59506e+07	0.000290905	0.000627979	0.000459442	0.000168537	387
Q9HAV7	Q9HAV7	GRPEL1	GrpE protein homolog 1, mitochondrial	1.45851e+08	5.62622e+07	1.01056e+08	0.000425464	0.000489506	0.000457485	3.2021e-05	388
Q9ULV4-3	Q9ULV4	CORO1C	Isoform 3 of Coronin-1C	1.55422e+08	5.30388e+07	1.0423e+08	0.000453385	0.000461461	0.000457423	4.03836e-06	389
Q99497	Q99497	PARK7	Protein deglycase DJ-1	1.92485e+08	4.02485e+07	1.16367e+08	0.000561501	0.00035018	0.00045584	0.00010566	390
Q12907	Q12907	LMAN2	Vesicular integral-membrane protein VIP36	1.32869e+08	5.98348e+07	9.63519e+07	0.000387595	0.00052059	0.000454092	6.64974e-05	391
Q13151	Q13151	HNRNPA0	Heterogeneous nuclear ribonucleoprotein A0	8.80086e+07	7.43965e+07	8.12026e+07	0.000256732	0.000647283	0.000452007	0.000195276	392
P30044	P30044	PRDX5	Peroxiredoxin-5, mitochondrial	1.50401e+08	5.33996e+07	1.019e+08	0.000438738	0.0004646	0.000451669	1.2931e-05	393
P20962	P20962	PTMS	Parathymosin	5.78995e+07	8.43628e+07	7.11311e+07	0.0001689	0.000733994	0.000451447	0.000282547	394
Q13185	Q13185	CBX3	Chromobox protein homolog 3	1.61553e+08	4.92271e+07	1.0539e+08	0.000471268	0.000428298	0.000449783	2.14853e-05	395
P43307	P43307	SSR1	Translocon-associated protein subunit alpha	9.86804e+07	6.98813e+07	8.42808e+07	0.000287862	0.000607998	0.00044793	0.000160068	396
P35637	P35637	FUS	RNA-binding protein FUS	1.55719e+08	5.06373e+07	1.03178e+08	0.000454251	0.000440567	0.000447409	6.84222e-06	397
P35580-2	P35580	MYH10	Isoform 2 of Myosin-10	8.40657e+07	7.41024e+07	7.90841e+07	0.00024523	0.000644724	0.000444977	0.000199747	398
Q86V81	Q86V81	ALYREF	THO complex subunit 4	1.54913e+08	5.01017e+07	1.02507e+08	0.000451899	0.000435907	0.000443903	7.99613e-06	399
Q9P2E9	Q9P2E9	RRBP1	Ribosome-binding protein 1	1.59572e+08	4.82945e+07	1.03933e+08	0.00046549	0.000420184	0.000442837	2.2653e-05	400
Q08211	Q08211	DHX9	ATP-dependent RNA helicase A	1.55461e+08	4.94711e+07	1.02466e+08	0.000453498	0.00043042	0.000441959	1.15387e-05	401
P48643	P48643	CCT5	T-complex protein 1 subunit epsilon	1.61029e+08	4.74701e+07	1.0425e+08	0.00046974	0.000413011	0.000441376	2.83649e-05	402
P05198	P05198	EIF2S1	Eukaryotic translation initiation factor 2 subunit 1	1.40916e+08	5.41231e+07	9.75193e+07	0.000411067	0.000470895	0.000440981	2.99139e-05	403
Q99714	Q99714	HSD17B10	3-hydroxyacyl-CoA dehydrogenase type-2	1.26038e+08	5.8835e+07	9.24364e+07	0.000367667	0.000511891	0.000439779	7.21118e-05	404
P62841	P62841	RPS15	40S ribosomal protein S15	1.0658e+08	6.52734e+07	8.59267e+07	0.000310907	0.000567907	0.000439407	0.0001285	405
Q9UM00	Q9UM00	TMCO1	Calcium load-activated calcium channel	1.30862e+08	5.70059e+07	9.39338e+07	0.000381739	0.000495977	0.000438858	5.71188e-05	406
Q15651	Q15651	HMGN3	High mobility group nucleosome-binding domain-containing protein 3	1.50164e+08		1.50164e+08	0.000438047		0.000438047		407
P14927	P14927	UQCRB	Cytochrome b-c1 complex subunit 7	1.2335e+08	5.91677e+07	9.1259e+07	0.000359827	0.000514785	0.000437306	7.74791e-05	408
P36957	P36957	DLST	Dihydrolipoyllysine-residue succinyltransferase component of 2-oxoglutarate dehydrogenase complex, mitochondrial	1.60321e+08	4.63915e+07	1.03356e+08	0.000467676	0.000403627	0.000435651	3.20246e-05	409
P20042	P20042	EIF2S2	Eukaryotic translation initiation factor 2 subunit 2	1.44638e+08	5.16091e+07	9.81234e+07	0.000421925	0.000449022	0.000435474	1.35482e-05	410
O43852-3	O43852	CALU	Isoform 3 of Calumenin	1.40602e+08	5.25959e+07	9.65988e+07	0.000410152	0.000457608	0.00043388	2.3728e-05	411
P52565	P52565	ARHGDIA	Rho GDP-dissociation inhibitor 1	1.29604e+08	5.6077e+07	9.28406e+07	0.000378071	0.000487894	0.000432983	5.49118e-05	412
P63165	P63165	SUMO1	Small ubiquitin-related modifier 1	1.54069e+08	4.7815e+07	1.00942e+08	0.000449437	0.000416011	0.000432724	1.67126e-05	413
P08574	P08574	CYC1	Cytochrome c1, heme protein, mitochondrial	2.69634e+08	9.02948e+06	1.39332e+08	0.000786554	7.85605e-05	0.000432557	0.000353997	414
Q14315	Q14315	FLNC	Filamin-C	1.11426e+08	6.2068e+07	8.67469e+07	0.000325042	0.000540019	0.000432531	0.000107488	415
P62136-2	P62136	PPP1CA	Isoform 2 of Serine/threonine-protein phosphatase PP1-alpha catalytic subunit	1.09385e+08	6.26732e+07	8.60289e+07	0.000319088	0.000545285	0.000432186	0.000113098	416
Q9Y2Q3	Q9Y2Q3	GSTK1	Glutathione S-transferase kappa 1	1.13556e+08	6.11517e+07	8.73537e+07	0.000331255	0.000532047	0.000431651	0.000100396	417
P51148-2	P51148	RAB5C	Isoform 2 of Ras-related protein Rab-5C	1.36341e+08	5.3287e+07	9.4814e+07	0.000397722	0.000463621	0.000430672	3.29492e-05	418
P62987	P62987	UBA52	Ubiquitin-60S ribosomal protein L40	7.3474e+07	7.41694e+07	7.38217e+07	0.000214332	0.000645307	0.00042982	0.000215487	419
Q8N4H5-2	Q8N4H5	TOMM5	Isoform 2 of Mitochondrial import receptor subunit TOM5 homolog	1.76209e+08	3.92576e+07	1.07733e+08	0.000514022	0.000341558	0.00042779	8.6232e-05	420
P62847-4	P62847	RPS24	Isoform 4 of 40S ribosomal protein S24	9.86624e+07	6.52159e+07	8.19391e+07	0.00028781	0.000567407	0.000427608	0.000139799	421
P23588	P23588	EIF4B	Eukaryotic translation initiation factor 4B	1.53397e+08	4.66652e+07	1.00031e+08	0.000447478	0.000406008	0.000426743	2.07347e-05	422
P07686	P07686	HEXB	Beta-hexosaminidase subunit beta	1.09748e+08	6.07171e+07	8.52323e+07	0.000320147	0.000528266	0.000424206	0.000104059	423
P40227	P40227	CCT6A	T-complex protein 1 subunit zeta	1.43352e+08	4.91877e+07	9.62698e+07	0.000418174	0.000427955	0.000423065	4.89043e-06	424
O95292	O95292	VAPB	Vesicle-associated membrane protein-associated protein B/C	1.5607e+08	4.42795e+07	1.00175e+08	0.000455274	0.000385251	0.000420262	3.50114e-05	425
P23219-6	P23219	PTGS1	Isoform 6 of Prostaglandin G/H synthase 1	1.80421e+08	3.60552e+07	1.08238e+08	0.000526308	0.000313696	0.000420002	0.000106306	426
P22307	P22307	SCP2	Non-specific lipid-transfer protein	1.55178e+08	4.44911e+07	9.98347e+07	0.000452673	0.000387093	0.000419883	3.27903e-05	427
P0CG48	P0CG48	UBC	Polyubiquitin-C	1.6679e+08	4.04992e+07	1.03644e+08	0.000486546	0.000352361	0.000419453	6.70925e-05	428
P14678-3	P14678	SNRPB	Isoform SM-B1 of Small nuclear ribonucleoprotein-associated proteins B and B'	1.52016e+08	4.54285e+07	9.87224e+07	0.000443449	0.000395248	0.000419349	2.41004e-05	429
P62312	P62312	LSM6	U6 snRNA-associated Sm-like protein LSm6	5.81027e+07	7.66886e+07	6.73957e+07	0.000169492	0.000667225	0.000418359	0.000248866	430
P12109	P12109	COL6A1	Collagen alpha-1(VI) chain	1.52847e+08	4.48407e+07	9.8844e+07	0.000445874	0.000390134	0.000418004	2.787e-05	431
P62879	P62879	GNB2	Guanine nucleotide-binding protein G(I)/G(S)/G(T) subunit beta-2	1.36814e+08	5.00779e+07	9.34461e+07	0.000399103	0.0004357	0.000417402	1.82983e-05	432
Q6DD88	Q6DD88	ATL3	Atlastin-3	1.34031e+08	5.0939e+07	9.24849e+07	0.000390984	0.000443192	0.000417088	2.61043e-05	433
Q9NZN4	Q9NZN4	EHD2	EH domain-containing protein 2	8.04265e+07	6.8791e+07	7.46087e+07	0.000234614	0.000598512	0.000416563	0.000181949	434
P30626	P30626	SRI	Sorcin	1.28425e+08	5.25881e+07	9.05065e+07	0.00037463	0.00045754	0.000416085	4.14549e-05	435
P20700	P20700	LMNB1	Lamin-B1	1.43573e+08	4.73801e+07	9.54763e+07	0.000418818	0.000412228	0.000415523	3.29516e-06	436
Q96AE4-2	Q96AE4	FUBP1	Isoform 2 of Far upstream element-binding protein 1	8.84683e+07	6.37648e+07	7.61166e+07	0.000258073	0.000554782	0.000406427	0.000148355	437
A8MWD9	A8MWD9	SNRPGP15	Putative small nuclear ribonucleoprotein G-like protein 15	1.0255e+08	5.89808e+07	8.07652e+07	0.000299149	0.000513159	0.000406154	0.000107005	438
Q9H4A6	Q9H4A6	GOLPH3	Golgi phosphoprotein 3	2.67048e+07	8.42904e+07	5.54976e+07	7.7901e-05	0.000733364	0.000405633	0.000327732	439
Q15005	Q15005	SPCS2	Signal peptidase complex subunit 2	1.09294e+08	5.60098e+07	8.26519e+07	0.000318823	0.000487311	0.000403067	8.42436e-05	440
P62318	P62318	SNRPD3	Small nuclear ribonucleoprotein Sm D3	1.61295e+08	3.82229e+07	9.97591e+07	0.000470517	0.000332556	0.000401537	6.89807e-05	441
P62191	P62191	PSMC1	26S protease regulatory subunit 4	1.45895e+08	4.31685e+07	9.45319e+07	0.000425594	0.000375585	0.00040059	2.50043e-05	442
O43809	O43809	NUDT21	Cleavage and polyadenylation specificity factor subunit 5	1.64426e+08	3.68679e+07	1.00647e+08	0.000479649	0.000320767	0.000400208	7.94413e-05	443
Q15388	Q15388	TOMM20	Mitochondrial import receptor subunit TOM20 homolog	1.39124e+08	4.51932e+07	9.21585e+07	0.000405841	0.000393201	0.000399521	6.32002e-06	444
Q5SSJ5	Q5SSJ5	HP1BP3	Heterochromatin protein 1-binding protein 3	1.05295e+08	5.65079e+07	8.09014e+07	0.000307157	0.000491644	0.000399401	9.22432e-05	445
P50995	P50995	ANXA11	Annexin A11	1.38979e+08	4.4969e+07	9.19738e+07	0.000405417	0.000391251	0.000398334	7.0831e-06	446
Q9GZQ8	Q9GZQ8	MAP1LC3B	Microtubule-associated proteins 1A/1B light chain 3B	8.31909e+07	6.33749e+07	7.32829e+07	0.000242678	0.000551389	0.000397034	0.000154356	447
P60900	P60900	PSMA6	Proteasome subunit alpha type-6	1.47828e+08	4.16633e+07	9.47455e+07	0.000431231	0.00036249	0.00039686	3.43705e-05	448
P14649	P14649	MYL6B	Myosin light chain 6B	1.67606e+08	3.46393e+07	1.01123e+08	0.000488927	0.000301377	0.000395152	9.37747e-05	449
P17987	P17987	TCP1	T-complex protein 1 subunit alpha	1.35047e+08	4.51034e+07	9.0075e+07	0.000393947	0.00039242	0.000393183	7.63476e-07	450
O00422	O00422	SAP18	Histone deacetylase complex subunit SAP18	1.10903e+08	5.30786e+07	8.19908e+07	0.000323517	0.000461808	0.000392662	6.91454e-05	451
P00167	P00167	CYB5A	Cytochrome b5	8.65493e+07	6.09839e+07	7.37666e+07	0.000252475	0.000530587	0.000391531	0.000139056	452
P42765	P42765	ACAA2	3-ketoacyl-CoA thiolase, mitochondrial	1.18623e+08	4.9763e+07	8.41929e+07	0.000346037	0.00043296	0.000389498	4.34613e-05	453
Q99832	Q99832	CCT7	T-complex protein 1 subunit eta	1.60504e+08	3.57207e+07	9.81124e+07	0.00046821	0.000310786	0.000389498	7.87116e-05	454
P49257	P49257	LMAN1	Protein ERGIC-53	1.48972e+08	3.94246e+07	9.41984e+07	0.00043457	0.000343011	0.00038879	4.57793e-05	455
Q9NVJ2	Q9NVJ2	ARL8B	ADP-ribosylation factor-like protein 8B	1.08838e+08	5.22988e+07	8.05687e+07	0.000317495	0.000455023	0.000386259	6.87642e-05	456
Q16576	Q16576	RBBP7	Histone-binding protein RBBP7	1.69662e+08	3.13099e+07	1.00486e+08	0.000494924	0.00027241	0.000383667	0.000111257	457
P10620	P10620	MGST1	Microsomal glutathione S-transferase 1	1.86353e+08	2.55911e+07	1.05972e+08	0.000543615	0.000222654	0.000383134	0.00016048	458
P07996	P07996	THBS1	Thrombospondin-1	6.97313e+07	6.36846e+07	6.67079e+07	0.000203414	0.000554084	0.000378749	0.000175335	459
P41091	P41091	EIF2S3	Eukaryotic translation initiation factor 2 subunit 3	9.52732e+07	5.48984e+07	7.50858e+07	0.000277923	0.000477641	0.000377782	9.98589e-05	460
P07954	P07954	FH	Fumarate hydratase, mitochondrial	1.3597e+08	4.11927e+07	8.85813e+07	0.00039664	0.000358395	0.000377518	1.91227e-05	461
P42704	P42704	LRPPRC	Leucine-rich PPR motif-containing protein, mitochondrial	1.2725e+08	4.39751e+07	8.56124e+07	0.000371202	0.000382603	0.000376903	5.70038e-06	462
P55036	P55036	PSMD4	26S proteasome non-ATPase regulatory subunit 4	1.36193e+08	4.09543e+07	8.85736e+07	0.000397291	0.000356321	0.000376806	2.0485e-05	463
O75821	O75821	EIF3G	Eukaryotic translation initiation factor 3 subunit G	1.60631e+08	3.2268e+07	9.64493e+07	0.000468579	0.000280746	0.000374662	9.39163e-05	464
P48681	P48681	NES	Nestin	1.25225e+08	4.39231e+07	8.45738e+07	0.000365295	0.00038215	0.000373723	8.42776e-06	465
P07951-2	P07951	TPM2	Isoform 2 of Tropomyosin beta chain	2.94546e+07	7.59985e+07	5.27265e+07	8.59224e-05	0.000661221	0.000373572	0.000287649	466
P08123	P08123	COL1A2	Collagen alpha-2(I) chain	1.12389e+07	8.19778e+07	4.66083e+07	3.27851e-05	0.000713243	0.000373014	0.000340229	467
P51659	P51659	HSD17B4	Peroxisomal multifunctional enzyme type 2	1.24341e+08	4.39619e+07	8.41513e+07	0.000362716	0.000382488	0.000372602	9.88591e-06	468
P59998-3	P59998	ARPC4	Isoform 3 of Actin-related protein 2/3 complex subunit 4	9.82438e+07	5.26895e+07	7.54666e+07	0.000286589	0.000458422	0.000372505	8.59167e-05	469
Q16186	Q16186	ADRM1	Proteasomal ubiquitin receptor ADRM1	7.81159e+07	5.93908e+07	6.87534e+07	0.000227873	0.000516726	0.0003723	0.000144426	470
P12236	P12236	SLC25A6	ADP/ATP translocase 3	1.54738e+08	3.31459e+07	9.3942e+07	0.000451389	0.000288384	0.000369887	8.15026e-05	471
P09622	P09622	DLD	Dihydrolipoyl dehydrogenase, mitochondrial	1.13668e+08	4.67931e+07	8.02308e+07	0.000331584	0.000407121	0.000369353	3.77682e-05	472
P61106	P61106	RAB14	Ras-related protein Rab-14	1.27538e+08	4.20668e+07	8.48022e+07	0.000372042	0.000366	0.000369021	3.02131e-06	473
P17980	P17980	PSMC3	26S protease regulatory subunit 6A	9.87729e+07	5.15929e+07	7.51829e+07	0.000288132	0.000448881	0.000368507	8.03742e-05	474
P61009	P61009	SPCS3	Signal peptidase complex subunit 3	1.55209e+08	3.26016e+07	9.39055e+07	0.000452764	0.000283649	0.000368206	8.45579e-05	475
P39687	P39687	ANP32A	Acidic leucine-rich nuclear phosphoprotein 32 family member A	1.66131e+08	2.89348e+07	9.75327e+07	0.000484622	0.000251746	0.000368184	0.000116438	476
P31948-2	P31948	STIP1	Isoform 2 of Stress-induced-phosphoprotein 1	1.54089e+08	3.26781e+07	9.33834e+07	0.000449495	0.000284314	0.000366904	8.25908e-05	477
P22087	P22087	FBL	rRNA 2'-O-methyltransferase fibrillarin	1.51651e+08	3.31148e+07	9.23828e+07	0.000442383	0.000288113	0.000365248	7.71351e-05	478
P02452	P02452	COL1A1	Collagen alpha-1(I) chain	2.07826e+07	7.68467e+07	4.88146e+07	6.06252e-05	0.0006686	0.000364613	0.000303988	479
O15460-2	O15460	P4HA2	Isoform IIa of Prolyl 4-hydroxylase subunit alpha-2	8.22661e+07	5.61011e+07	6.91836e+07	0.00023998	0.000488104	0.000364042	0.000124062	480
P78371	P78371	CCT2	T-complex protein 1 subunit beta	1.30261e+08	3.97876e+07	8.50241e+07	0.000379986	0.00034617	0.000363078	1.69078e-05	481
O00299	O00299	CLIC1	Chloride intracellular channel protein 1	1.37688e+08	3.69922e+07	8.73401e+07	0.000401652	0.000321848	0.00036175	3.99021e-05	482
P61026	P61026	RAB10	Ras-related protein Rab-10	1.30568e+08	3.91449e+07	8.48566e+07	0.000380883	0.000340578	0.000360731	2.01525e-05	483
P98179	P98179	RBM3	RNA-binding protein 3	1.45696e+08	3.3659e+07	8.96773e+07	0.000425011	0.000292848	0.00035893	6.60817e-05	484
P28072	P28072	PSMB6	Proteasome subunit beta type-6	1.34846e+08	3.70717e+07	8.5959e+07	0.000393362	0.00032254	0.000357951	3.5411e-05	485
O76021	O76021	RSL1D1	Ribosomal L1 domain-containing protein 1	1.29758e+08	3.87111e+07	8.42346e+07	0.00037852	0.000336804	0.000357662	2.0858e-05	486
Q8WUD1	Q8WUD1	RAB2B	Ras-related protein Rab-2B	8.17077e+07	5.48139e+07	6.82608e+07	0.000238351	0.000476906	0.000357628	0.000119277	487
P15954	P15954	COX7C	Cytochrome c oxidase subunit 7C, mitochondrial	7.783e+07	5.60789e+07	6.69544e+07	0.000227039	0.000487911	0.000357475	0.000130436	488
P61204	P61204	ARF3	ADP-ribosylation factor 3	7.82581e+07	5.59334e+07	6.70958e+07	0.000228288	0.000486646	0.000357467	0.000129179	489
P09497-2	P09497	CLTB	Isoform Non-brain of Clathrin light chain B	1.23902e+08	4.05879e+07	8.22452e+07	0.000361438	0.000353133	0.000357286	4.15239e-06	490
Q9NZM1	Q9NZM1	MYOF	Myoferlin	9.62366e+07	4.98014e+07	7.3019e+07	0.000280733	0.000433295	0.000357014	7.62806e-05	491
P56385	P56385	ATP5I	ATP synthase subunit e, mitochondrial	1.27905e+08	3.90761e+07	8.34904e+07	0.000373113	0.000339979	0.000356546	1.65672e-05	492
P82979	P82979	SARNP	SAP domain-containing ribonucleoprotein	1.36792e+08	3.53762e+07	8.60842e+07	0.000399039	0.000307789	0.000353414	4.5625e-05	493
P19367-3	P19367	HK1	Isoform 3 of Hexokinase-1	1.21829e+08	4.03751e+07	8.11023e+07	0.000355391	0.000351281	0.000353336	2.05474e-06	494
Q00341	Q00341	HDLBP	Vigilin	1.15596e+08	4.24527e+07	7.90244e+07	0.000337207	0.000369357	0.000353282	1.60748e-05	495
P30405	P30405	PPIF	Peptidyl-prolyl cis-trans isomerase F, mitochondrial	1.35575e+08	3.55394e+07	8.55573e+07	0.000395489	0.000309209	0.000352349	4.314e-05	496
O15372	O15372	EIF3H	Eukaryotic translation initiation factor 3 subunit H	1.14464e+08	4.24666e+07	7.84655e+07	0.000333906	0.000369478	0.000351692	1.77859e-05	497
P07197	P07197	NEFM	Neurofilament medium polypeptide	2.11059e+08	9.79998e+06	1.1043e+08	0.000615685	8.52641e-05	0.000350474	0.00026521	498
P10619	P10619	CTSA	Lysosomal protective protein	9.87275e+07	4.73639e+07	7.30457e+07	0.000288	0.000412087	0.000350043	6.20434e-05	499
Q9Y490	Q9Y490	TLN1	Talin-1	6.47849e+07	5.86067e+07	6.16958e+07	0.000188985	0.000509904	0.000349445	0.00016046	500
O75718	O75718	CRTAP	Cartilage-associated protein	8.93546e+07	5.01495e+07	6.9752e+07	0.000260658	0.000436323	0.00034849	8.78325e-05	501
Q9UHD8	Q9UHD8	40057	Septin-9	7.82263e+07	5.36277e+07	6.5927e+07	0.000228195	0.000466585	0.00034739	0.000119195	502
P47755	P47755	CAPZA2	F-actin-capping protein subunit alpha-2	1.54848e+08	2.79214e+07	9.13848e+07	0.000451711	0.000242929	0.00034732	0.000104391	503
Q6NUK1	Q6NUK1	SLC25A24	Calcium-binding mitochondrial carrier protein SCaMC-1	1.05541e+08	4.42544e+07	7.48976e+07	0.000307875	0.000385033	0.000346454	3.85789e-05	504
Q9NX63	Q9NX63	CHCHD3	MICOS complex subunit MIC19	1.54847e+08	2.7554e+07	9.12004e+07	0.000451706	0.000239732	0.000345719	0.000105987	505
Q15185	Q15185	PTGES3	Prostaglandin E synthase 3	1.14214e+08	4.1121e+07	7.76674e+07	0.000333175	0.000357771	0.000345473	1.22978e-05	506
P25787	P25787	PSMA2	Proteasome subunit alpha type-2	1.38121e+08	3.30058e+07	8.55636e+07	0.000402917	0.000287165	0.000345041	5.78758e-05	507
Q14152	Q14152	EIF3A	Eukaryotic translation initiation factor 3 subunit A	1.25469e+08	3.70492e+07	8.12591e+07	0.000366008	0.000322345	0.000344176	2.18315e-05	508
P24752	P24752	ACAT1	Acetyl-CoA acetyltransferase, mitochondrial	1.36298e+08	3.32821e+07	8.47898e+07	0.000397596	0.000289569	0.000343582	5.40135e-05	509
Q9Y3F4-2	Q9Y3F4	STRAP	Isoform 2 of Serine-threonine kinase receptor-associated protein	1.62461e+08	2.43129e+07	9.33867e+07	0.000473917	0.000211533	0.000342725	0.000131192	510
Q70UQ0-4	Q70UQ0	IKBIP	Isoform 4 of Inhibitor of nuclear factor kappa-B kinase-interacting protein	1.4568e+08	2.94534e+07	8.75666e+07	0.000424965	0.000256258	0.000340611	8.43535e-05	511
P53801	P53801	PTTG1IP	Pituitary tumor-transforming gene 1 protein-interacting protein	1.46454e+08	2.91598e+07	8.78071e+07	0.000427225	0.000253703	0.000340464	8.67606e-05	512
O43670-4	O43670	ZNF207	Isoform 4 of BUB3-interacting and GLEBS motif-containing protein ZNF207	9.52051e+07	4.58582e+07	7.05316e+07	0.000277725	0.000398986	0.000338355	6.06308e-05	513
Q99873	Q99873	PRMT1	Protein arginine N-methyltransferase 1	1.05703e+08	4.23374e+07	7.40204e+07	0.00030835	0.000368354	0.000338352	3.00021e-05	514
P78417	P78417	GSTO1	Glutathione S-transferase omega-1	1.45329e+08	2.89658e+07	8.71472e+07	0.000423941	0.000252016	0.000337978	8.59627e-05	515
P62195	P62195	PSMC5	26S protease regulatory subunit 8	1.16065e+08	3.86637e+07	7.73642e+07	0.000338574	0.000336391	0.000337483	1.0916e-06	516
O60506	O60506	SYNCRIP	Heterogeneous nuclear ribonucleoprotein Q	1.2998e+08	3.38268e+07	8.19035e+07	0.000379168	0.000294308	0.000336738	4.24297e-05	517
P61160	P61160	ACTR2	Actin-related protein 2	9.55877e+07	4.51629e+07	7.03753e+07	0.000278841	0.000392937	0.000335889	5.70482e-05	518
P69905	P69905	HBA1	Hemoglobin subunit alpha	1.08237e+08	4.08549e+07	7.45458e+07	0.000315739	0.000355456	0.000335598	1.98583e-05	519
P09661	P09661	SNRPA1	U2 small nuclear ribonucleoprotein A'	8.61533e+07	4.81736e+07	6.71634e+07	0.000251319	0.000419132	0.000335226	8.39062e-05	520
Q1KMD3	Q1KMD3	HNRNPUL2	Heterogeneous nuclear ribonucleoprotein U-like protein 2	1.05437e+08	4.15728e+07	7.35049e+07	0.000307572	0.000361702	0.000334637	2.70646e-05	521
P11766	P11766	ADH5	Alcohol dehydrogenase class-3	1.01954e+08	4.24062e+07	7.21803e+07	0.000297413	0.000368952	0.000333183	3.57697e-05	522
O60869	O60869	EDF1	Endothelial differentiation-related factor 1	8.41207e+07	4.82273e+07	6.6174e+07	0.00024539	0.000419599	0.000332494	8.71042e-05	523
P22314	P22314	UBA1	Ubiquitin-like modifier-activating enzyme 1	1.15046e+08	3.73893e+07	7.62177e+07	0.000335603	0.000325304	0.000330453	5.14945e-06	524
Q00577	Q00577	PURA	Transcriptional activator protein Pur-alpha	1.13174e+08		1.13174e+08	0.000330141		0.000330141		525
P67936	P67936	TPM4	Tropomyosin alpha-4 chain	5.29914e+07	5.74286e+07	5.521e+07	0.000154582	0.000499655	0.000327118	0.000172536	526
Q99613	Q99613	EIF3C	Eukaryotic translation initiation factor 3 subunit C	1.12873e+08	3.73344e+07	7.51035e+07	0.000329263	0.000324826	0.000327044	2.21824e-06	527
P50991	P50991	CCT4	T-complex protein 1 subunit delta	1.08552e+08	3.87587e+07	7.36552e+07	0.000316658	0.000337218	0.000326938	1.02799e-05	528
Q99439	Q99439	CNN2	Calponin-2	5.18609e+07	5.77305e+07	5.47957e+07	0.000151285	0.000502281	0.000326783	0.000175498	529
O00303	O00303	EIF3F	Eukaryotic translation initiation factor 3 subunit F	9.29944e+07	4.36686e+07	6.83315e+07	0.000271276	0.000379936	0.000325606	5.43302e-05	530
Q99829	Q99829	CPNE1	Copine-1	5.73275e+07	5.55082e+07	5.64179e+07	0.000167231	0.000482946	0.000325089	0.000157858	531
P12110	P12110	COL6A2	Collagen alpha-2(VI) chain	1.06473e+08	3.87508e+07	7.26121e+07	0.000310595	0.000337149	0.000323872	1.32767e-05	532
Q9HDC9	Q9HDC9	APMAP	Adipocyte plasma membrane-associated protein	1.07843e+08	3.82364e+07	7.30397e+07	0.000314591	0.000332674	0.000323632	9.04145e-06	533
O00231	O00231	PSMD11	26S proteasome non-ATPase regulatory subunit 11	1.17318e+08	3.49523e+07	7.61352e+07	0.000342231	0.0003041	0.000323166	1.90654e-05	534
P84090	P84090	ERH	Enhancer of rudimentary homolog	8.44207e+07	4.56604e+07	6.50406e+07	0.000246265	0.000397265	0.000321765	7.55001e-05	535
Q9H3N1	Q9H3N1	TMX1	Thioredoxin-related transmembrane protein 1	1.15816e+08	3.5133e+07	7.54745e+07	0.000337849	0.000305673	0.000321761	1.60881e-05	536
P46063	P46063	RECQL	ATP-dependent DNA helicase Q1	1.24674e+08	3.21595e+07	7.84168e+07	0.000363689	0.000279802	0.000321746	4.19435e-05	537
P31930	P31930	UQCRC1	Cytochrome b-c1 complex subunit 1, mitochondrial	1.15792e+08	3.49383e+07	7.53649e+07	0.000337778	0.000303978	0.000320878	1.68996e-05	538
P09493-6	P09493	TPM1	Isoform 6 of Tropomyosin alpha-1 chain	7.50542e+06	7.09445e+07	3.9225e+07	2.18942e-05	0.000617249	0.000319571	0.000297677	539
P05386	P05386	RPLP1	60S acidic ribosomal protein P1	1.17167e+08	3.41088e+07	7.5638e+07	0.000341791	0.000296762	0.000319276	2.25147e-05	540
P11177	P11177	PDHB	Pyruvate dehydrogenase E1 component subunit beta, mitochondrial	1.39666e+08	2.61944e+07	8.293e+07	0.000407421	0.000227902	0.000317662	8.97594e-05	541
Q9Y5L4	Q9Y5L4	TIMM13	Mitochondrial import inner membrane translocase subunit Tim13	1.2558e+08	3.04896e+07	7.8035e+07	0.000366333	0.000265273	0.000315803	5.053e-05	542
Q01518	Q01518	CAP1	Adenylyl cyclase-associated protein 1	1.01149e+08	3.85721e+07	6.98606e+07	0.000295064	0.000335594	0.000315329	2.02649e-05	543
P24539	P24539	ATP5F1	ATP synthase F(0) complex subunit B1, mitochondrial	1.05903e+08	3.69022e+07	7.14026e+07	0.000308932	0.000321066	0.000314999	6.06689e-06	544
Q7RTV0	Q7RTV0	PHF5A	PHD finger-like domain-containing protein 5A	1.32825e+08	2.77664e+07	8.02955e+07	0.000387465	0.00024158	0.000314522	7.29425e-05	545
Q99729-3	Q99729	HNRNPAB	Isoform 3 of Heterogeneous nuclear ribonucleoprotein A/B	9.95872e+07	3.88362e+07	6.92117e+07	0.000290508	0.000337892	0.0003142	2.36922e-05	546
Q9UBS4	Q9UBS4	DNAJB11	DnaJ homolog subfamily B member 11	9.9304e+07	3.88785e+07	6.90913e+07	0.000289682	0.00033826	0.000313971	2.42894e-05	547
P38117-2	P38117	ETFB	Isoform 2 of Electron transfer flavoprotein subunit beta	1.03731e+08	3.72768e+07	7.05038e+07	0.000302595	0.000324325	0.00031346	1.0865e-05	548
P09543	P09543	CNP	2',3'-cyclic-nucleotide 3'-phosphodiesterase	8.44516e+07	4.35529e+07	6.40022e+07	0.000246355	0.000378929	0.000312642	6.62871e-05	549
P21964	P21964	COMT	Catechol O-methyltransferase	7.73139e+07	4.58945e+07	6.16042e+07	0.000225534	0.000399302	0.000312418	8.68843e-05	550
P05204	P05204	HMGN2	Non-histone chromosomal protein HMG-17	1.70556e+08	1.45521e+07	9.25542e+07	0.000497533	0.00012661	0.000312071	0.000185462	551
Q99798	Q99798	ACO2	Aconitate hydratase, mitochondrial	9.72239e+07	3.9091e+07	6.81575e+07	0.000283613	0.000340109	0.000311861	2.8248e-05	552
P60953	P60953	CDC42	Cell division control protein 42 homolog	7.94024e+07	4.50357e+07	6.22191e+07	0.000231626	0.00039183	0.000311728	8.0102e-05	553
Q15019-2	Q15019	37500	Isoform 2 of Septin-2	6.72171e+07	4.90309e+07	5.8124e+07	0.00019608	0.000426591	0.000311336	0.000115255	554
P63010-2	P63010	AP2B1	Isoform 2 of AP-2 complex subunit beta	1.15663e+08	3.27265e+07	7.41946e+07	0.000337401	0.000284735	0.000311068	2.63331e-05	555
Q9Y6N5	Q9Y6N5	SQRDL	Sulfide:quinone oxidoreductase, mitochondrial	1.11855e+08	3.38184e+07	7.28369e+07	0.000326295	0.000294235	0.000310265	1.603e-05	556
Q9Y6H1	Q9Y6H1	CHCHD2	Coiled-coil-helix-coiled-coil-helix domain-containing protein 2	1.41275e+08	2.37768e+07	8.25261e+07	0.000412117	0.000206869	0.000309493	0.000102624	557
Q12797	Q12797	ASPH	Aspartyl/asparaginyl beta-hydroxylase	1.29661e+08	2.76467e+07	7.86541e+07	0.000378238	0.000240539	0.000309388	6.88495e-05	558
P47756-2	P47756	CAPZB	Isoform 2 of F-actin-capping protein subunit beta	1.15408e+08	3.21969e+07	7.38024e+07	0.000336658	0.000280127	0.000308393	2.82654e-05	559
Q01130	Q01130	SRSF2	Serine/arginine-rich splicing factor 2	1.4061e+08	2.3662e+07	8.21362e+07	0.000410177	0.00020587	0.000308023	0.000102154	560
P23142	P23142	FBLN1	Fibulin-1	3.36914e+07	5.93344e+07	4.65129e+07	9.82818e-05	0.000516236	0.000307259	0.000208977	561
P21980	P21980	TGM2	Protein-glutamine gamma-glutamyltransferase 2	5.08462e+07	5.35658e+07	5.2206e+07	0.000148324	0.000466046	0.000307185	0.000158861	562
P51397	P51397	DAP	Death-associated protein 1	8.27821e+07	4.2823e+07	6.28025e+07	0.000241485	0.000372579	0.000307032	6.55469e-05	563
Q16531	Q16531	DDB1	DNA damage-binding protein 1	1.11191e+08	3.32776e+07	7.22342e+07	0.000324357	0.00028953	0.000306943	1.74135e-05	564
P51858	P51858	HDGF	Hepatoma-derived growth factor	1.23164e+08	2.92535e+07	7.62089e+07	0.000359285	0.000254519	0.000306902	5.23829e-05	565
Q13283	Q13283	G3BP1	Ras GTPase-activating protein-binding protein 1	9.81031e+07	3.74432e+07	6.77732e+07	0.000286178	0.000325773	0.000305975	1.9797e-05	566
P62333	P62333	PSMC6	26S protease regulatory subunit 10B	1.14554e+08	3.17857e+07	7.31696e+07	0.000334166	0.00027655	0.000305358	2.88081e-05	567
Q04637-9	Q04637	EIF4G1	Isoform 9 of Eukaryotic translation initiation factor 4 gamma 1	8.84203e+07	4.05228e+07	6.44716e+07	0.000257932	0.000352567	0.00030525	4.73172e-05	568
P31942	P31942	HNRNPH3	Heterogeneous nuclear ribonucleoprotein H3	8.1903e+07	4.24651e+07	6.21841e+07	0.000238921	0.000369466	0.000304193	6.52724e-05	569
P34932	P34932	HSPA4	Heat shock 70 kDa protein 4	1.23464e+08	2.81714e+07	7.58176e+07	0.000360158	0.000245104	0.000302631	5.75271e-05	570
O75083	O75083	WDR1	WD repeat-containing protein 1	7.68905e+07	4.37602e+07	6.03254e+07	0.000224299	0.000380733	0.000302516	7.82174e-05	571
O75348	O75348	ATP6V1G1	V-type proton ATPase subunit G 1	9.15422e+07	3.88275e+07	6.51848e+07	0.000267039	0.000337816	0.000302428	3.53884e-05	572
Q5TGZ0	Q5TGZ0	MINOS1	MICOS complex subunit MIC10	1.6416e+08	1.43669e+07	8.92635e+07	0.000478875	0.000124998	0.000301937	0.000176938	573
O96008	O96008	TOMM40	Mitochondrial import receptor subunit TOM40 homolog	9.90445e+07	3.61607e+07	6.76026e+07	0.000288925	0.000314614	0.000301769	1.28448e-05	574
P67809	P67809	YBX1	Nuclease-sensitive element-binding protein 1	1.57447e+08	1.64957e+07	8.69711e+07	0.00045929	0.00014352	0.000301405	0.000157885	575
P30536	P30536	TSPO	Translocator protein	5.22327e+07	5.14078e+07	5.18203e+07	0.000152369	0.000447271	0.00029982	0.000147451	576
P57723	P57723	PCBP4	Poly(rC)-binding protein 4	6.86111e+07	4.5628e+07	5.71196e+07	0.000200147	0.000396984	0.000298565	9.84187e-05	577
P20340-2	P20340	RAB6A	Isoform 2 of Ras-related protein Rab-6A	7.1814e+07	4.44852e+07	5.81496e+07	0.00020949	0.000387041	0.000298266	8.87757e-05	578
P08621	P08621	SNRNP70	U1 small nuclear ribonucleoprotein 70 kDa	1.14909e+08	2.97944e+07	7.23518e+07	0.000335204	0.000259225	0.000297214	3.79896e-05	579
Q9BRL6	Q9BRL6	SRSF8	Serine/arginine-rich splicing factor 8	1.17617e+08	2.87497e+07	7.31833e+07	0.000343102	0.000250135	0.000296619	4.64838e-05	580
O15371	O15371	EIF3D	Eukaryotic translation initiation factor 3 subunit D	1.13561e+08	2.97037e+07	7.16323e+07	0.000331271	0.000258435	0.000294853	3.64178e-05	581
Q14165	Q14165	MLEC	Malectin	1.10961e+08	3.05088e+07	7.07347e+07	0.000323685	0.00026544	0.000294563	2.91224e-05	582
Q5T9A4	Q5T9A4	ATAD3B	ATPase family AAA domain-containing protein 3B	1.11878e+08	3.01375e+07	7.1008e+07	0.000326363	0.000262209	0.000294286	3.20766e-05	583
P62314	P62314	SNRPD1	Small nuclear ribonucleoprotein Sm D1	6.04595e+07	4.70604e+07	5.376e+07	0.000176368	0.000409446	0.000292907	0.000116539	584
P54819	P54819	AK2	Adenylate kinase 2, mitochondrial	8.48124e+07	3.85157e+07	6.1664e+07	0.000247408	0.000335103	0.000291256	4.38477e-05	585
P50502	P50502	ST13	Hsc70-interacting protein	1.11538e+08	2.93185e+07	7.04283e+07	0.00032537	0.000255084	0.000290227	3.51427e-05	586
P43487	P43487	RANBP1	Ran-specific GTPase-activating protein	1.35948e+08	2.10771e+07	7.85126e+07	0.000396577	0.00018338	0.000289978	0.000106598	587
Q15843	Q15843	NEDD8	NEDD8	1.60979e+08	1.26118e+07	8.67954e+07	0.000469595	0.000109728	0.000289661	0.000179934	588
Q9NP72	Q9NP72	RAB18	Ras-related protein Rab-18	9.65371e+07	3.39422e+07	6.52397e+07	0.00028161	0.000295312	0.000288461	6.85097e-06	589
P11387	P11387	TOP1	DNA topoisomerase 1	1.16564e+08	2.7039e+07	7.18013e+07	0.00034003	0.000235251	0.00028764	5.23894e-05	590
P48444	P48444	ARCN1	Coatomer subunit delta	7.27249e+07	4.15126e+07	5.71187e+07	0.000212147	0.000361178	0.000286662	7.45153e-05	591
P26368	P26368	U2AF2	Splicing factor U2AF 65 kDa subunit	6.95394e+07	4.25067e+07	5.6023e+07	0.000202855	0.000369827	0.000286341	8.34862e-05	592
Q9UNM6	Q9UNM6	PSMD13	26S proteasome non-ATPase regulatory subunit 13	9.58288e+07	3.36798e+07	6.47543e+07	0.000279544	0.000293029	0.000286287	6.74261e-06	593
P54886	P54886	ALDH18A1	Delta-1-pyrroline-5-carboxylate synthase	9.78494e+07	3.28591e+07	6.53542e+07	0.000285438	0.000285889	0.000285663	2.25186e-07	594
Q9Y5S9	Q9Y5S9	RBM8A	RNA-binding protein 8A	1.22634e+08	2.44489e+07	7.35415e+07	0.000357738	0.000212716	0.000285227	7.25109e-05	595
P53396	P53396	ACLY	ATP-citrate synthase	1.10904e+08	2.82803e+07	6.95919e+07	0.000323519	0.000246051	0.000284785	3.87339e-05	596
P35998	P35998	PSMC2	26S protease regulatory subunit 7	1.34115e+08	2.02446e+07	7.718e+07	0.000391231	0.000176137	0.000283684	0.000107547	597
Q9Y224	Q9Y224	C14orf166	UPF0568 protein C14orf166	1.11697e+08	2.76874e+07	6.96921e+07	0.000325833	0.000240893	0.000283363	4.247e-05	598
Q13347	Q13347	EIF3I	Eukaryotic translation initiation factor 3 subunit I	1.10832e+08	2.79205e+07	6.93764e+07	0.000323311	0.000242921	0.000283116	4.01948e-05	599
Q8N5K1	Q8N5K1	CISD2	CDGSH iron-sulfur domain-containing protein 2	1.02928e+08	3.01827e+07	6.65554e+07	0.000300254	0.000262602	0.000281428	1.88257e-05	600
P15586	P15586	GNS	N-acetylglucosamine-6-sulfatase	9.40829e+07	3.3014e+07	6.35485e+07	0.000274451	0.000287236	0.000280844	6.39271e-06	601
P11234-2	P11234	RALB	Isoform 2 of Ras-related protein Ral-B	1.11686e+08	2.6948e+07	6.93171e+07	0.000325802	0.00023446	0.000280131	4.56709e-05	602
Q16698	Q16698	DECR1	2,4-dienoyl-CoA reductase, mitochondrial	9.54068e+07	3.22233e+07	6.38151e+07	0.000278313	0.000280357	0.000279335	1.02183e-06	603
P49720	P49720	PSMB3	Proteasome subunit beta type-3	1.05432e+08	2.87509e+07	6.70913e+07	0.000307557	0.000250145	0.000278851	2.87057e-05	604
Q0ZGT2	Q0ZGT2	NEXN	Nexilin	4.49782e+07	4.89975e+07	4.69879e+07	0.000131207	0.0004263	0.000278753	0.000147547	605
Q9H8Y8-3	Q9H8Y8	GORASP2	Isoform 3 of Golgi reassembly-stacking protein 2	4.50898e+07	4.87012e+07	4.68955e+07	0.000131532	0.000423722	0.000277627	0.000146095	606
Q9BWF3	Q9BWF3	RBM4	RNA-binding protein 4	1.22989e+08	2.25278e+07	7.27583e+07	0.000358773	0.000196002	0.000277387	8.13854e-05	607
O15144	O15144	ARPC2	Actin-related protein 2/3 complex subunit 2	9.1738e+07	3.29227e+07	6.23303e+07	0.000267611	0.000286442	0.000277026	9.41578e-06	608
P80723	P80723	BASP1	Brain acid soluble protein 1	1.12453e+08	2.58943e+07	6.91739e+07	0.00032804	0.000225292	0.000276666	5.13738e-05	609
P55854-2	P55854	SUMO3	Isoform 2 of Small ubiquitin-related modifier 3	7.3314e+07	3.90071e+07	5.61606e+07	0.000213866	0.000339379	0.000276622	6.2757e-05	610
Q9Y3E5	Q9Y3E5	PTRH2	Peptidyl-tRNA hydrolase 2, mitochondrial	9.5938e+07	3.13959e+07	6.3667e+07	0.000279863	0.000273158	0.00027651	3.35214e-06	611
P52907	P52907	CAPZA1	F-actin-capping protein subunit alpha-1	1.3863e+08	1.69305e+07	7.77801e+07	0.000404399	0.000147303	0.000275851	0.000128548	612
P63208	P63208	SKP1	S-phase kinase-associated protein 1	1.30969e+08	1.93577e+07	7.51632e+07	0.000382051	0.00016842	0.000275236	0.000106816	613
O15145	O15145	ARPC3	Actin-related protein 2/3 complex subunit 3	8.28396e+07	3.54208e+07	5.91302e+07	0.000241653	0.000308177	0.000274915	3.3262e-05	614
P50213	P50213	IDH3A	Isocitrate dehydrogenase [NAD] subunit alpha, mitochondrial	9.59396e+07	3.09513e+07	6.34454e+07	0.000279867	0.00026929	0.000274578	5.28869e-06	615
P35606	P35606	COPB2	Coatomer subunit beta'	6.83363e+07	4.01396e+07	5.42379e+07	0.000199345	0.000349232	0.000274289	7.49436e-05	616
Q9NR30	Q9NR30	DDX21	Nucleolar RNA helicase 2	1.1439e+08	2.44642e+07	6.94273e+07	0.00033369	0.000212849	0.00027327	6.04205e-05	617
P53597	P53597	SUCLG1	Succinate--CoA ligase [ADP/GDP-forming] subunit alpha, mitochondrial	9.04378e+07	3.22862e+07	6.1362e+07	0.000263818	0.000280904	0.000272361	8.54304e-06	618
P26885	P26885	FKBP2	Peptidyl-prolyl cis-trans isomerase FKBP2	7.12039e+07	3.86562e+07	5.493e+07	0.00020771	0.000336326	0.000272018	6.43078e-05	619
Q9Y696	Q9Y696	CLIC4	Chloride intracellular channel protein 4	7.0856e+07	3.86177e+07	5.47369e+07	0.000206695	0.000335992	0.000271343	6.4648e-05	620
P16435	P16435	POR	NADPH--cytochrome P450 reductase	7.93504e+07	3.54905e+07	5.74205e+07	0.000231475	0.000308783	0.000270129	3.86543e-05	621
P53621	P53621	COPA	Coatomer subunit alpha	7.31225e+07	3.75585e+07	5.53405e+07	0.000213307	0.000326776	0.000270041	5.67343e-05	622
P49721	P49721	PSMB2	Proteasome subunit beta type-2	8.41233e+07	3.38537e+07	5.89885e+07	0.000245398	0.000294543	0.00026997	2.45726e-05	623
P52597	P52597	HNRNPF	Heterogeneous nuclear ribonucleoprotein F	9.44539e+07	3.0342e+07	6.2398e+07	0.000275533	0.000263989	0.000269761	5.77199e-06	624
P43243	P43243	MATR3	Matrin-3	9.34367e+07	3.06376e+07	6.20371e+07	0.000272566	0.00026656	0.000269563	3.00281e-06	625
P11279	P11279	LAMP1	Lysosome-associated membrane glycoprotein 1	9.10532e+07	3.11482e+07	6.11007e+07	0.000265613	0.000271003	0.000268308	2.69514e-06	626
P50395	P50395	GDI2	Rab GDP dissociation inhibitor beta	9.99283e+07	2.79723e+07	6.39503e+07	0.000291503	0.000243371	0.000267437	2.40657e-05	627
Q13423	Q13423	NNT	NAD(P) transhydrogenase, mitochondrial	7.86492e+07	3.49273e+07	5.67882e+07	0.000229429	0.000303883	0.000266656	3.72268e-05	628
P40261	P40261	NNMT	Nicotinamide N-methyltransferase	6.02436e+07	4.10026e+07	5.06231e+07	0.000175738	0.00035674	0.000266239	9.05014e-05	629
Q12905	Q12905	ILF2	Interleukin enhancer-binding factor 2	6.98648e+07	3.77554e+07	5.38101e+07	0.000203804	0.000328489	0.000266146	6.23424e-05	630
O95573	O95573	ACSL3	Long-chain-fatty-acid--CoA ligase 3	7.04216e+07	3.74364e+07	5.3929e+07	0.000205428	0.000325713	0.000265571	6.01426e-05	631
P51153	P51153	RAB13	Ras-related protein Rab-13	1.04388e+08	2.59799e+07	6.5184e+07	0.000304512	0.000226037	0.000265275	3.92379e-05	632
Q02818	Q02818	NUCB1	Nucleobindin-1	7.62559e+07	3.53247e+07	5.57903e+07	0.000222447	0.000307341	0.000264894	4.24467e-05	633
Q8WXF1	Q8WXF1	PSPC1	Paraspeckle component 1	9.29021e+07	2.97365e+07	6.13193e+07	0.000271006	0.000258721	0.000264864	6.14277e-06	634
Q9UI10-2	Q9UI10	EIF2B4	Isoform 2 of Translation initiation factor eIF-2B subunit delta	9.58847e+07	2.87199e+07	6.23023e+07	0.000279707	0.000249876	0.000264792	1.49154e-05	635
P61018-2	P61018	RAB4B	Isoform 2 of Ras-related protein Rab-4B	7.43376e+07	3.58801e+07	5.51089e+07	0.000216852	0.000312173	0.000264512	4.76604e-05	636
Q14019	Q14019	COTL1	Coactosin-like protein	8.26549e+07	3.30716e+07	5.78633e+07	0.000241114	0.000287737	0.000264426	2.33115e-05	637
Q99436	Q99436	PSMB7	Proteasome subunit beta type-7	1.1079e+08	2.36306e+07	6.72105e+07	0.000323189	0.000205597	0.000264393	5.87959e-05	638
Q92820	Q92820	GGH	Gamma-glutamyl hydrolase	6.7452e+07	3.79756e+07	5.27138e+07	0.000196765	0.000330405	0.000263585	6.68196e-05	639
O94826	O94826	TOMM70	Mitochondrial import receptor subunit TOM70	1.03026e+08	2.58584e+07	6.4442e+07	0.000300538	0.000224979	0.000262759	3.77792e-05	640
Q02790	Q02790	FKBP4	Peptidyl-prolyl cis-trans isomerase FKBP4	1.022e+08	2.6095e+07	6.41476e+07	0.00029813	0.000227038	0.000262584	3.5546e-05	641
P04632	P04632	CAPNS1	Calpain small subunit 1	9.48409e+07	2.84431e+07	6.1642e+07	0.000276662	0.000247468	0.000262065	1.45971e-05	642
P40925-3	P40925	MDH1	Isoform 3 of Malate dehydrogenase, cytoplasmic	1.05809e+08	2.46892e+07	6.52493e+07	0.000308658	0.000214807	0.000261733	4.69254e-05	643
P49773	P49773	HINT1	Histidine triad nucleotide-binding protein 1	8.97322e+07	3.0073e+07	5.99026e+07	0.00026176	0.000261648	0.000261704	5.55318e-08	644
O00151	O00151	PDLIM1	PDZ and LIM domain protein 1	4.52127e+07	4.46096e+07	4.49111e+07	0.000131891	0.000388124	0.000260007	0.000128116	645
P04899-4	P04899	GNAI2	Isoform sGi2 of Guanine nucleotide-binding protein G(i) subunit alpha-2	8.42749e+07	3.1349e+07	5.78119e+07	0.00024584	0.00027275	0.000259295	1.34552e-05	646
P47813	P47813	EIF1AX	Eukaryotic translation initiation factor 1A, X-chromosomal	7.63672e+07	3.39336e+07	5.51504e+07	0.000222772	0.000295238	0.000259005	3.62328e-05	647
P05091	P05091	ALDH2	Aldehyde dehydrogenase, mitochondrial	1.00267e+08	2.58067e+07	6.30369e+07	0.000292491	0.00022453	0.00025851	3.39806e-05	648
Q96CW1	Q96CW1	AP2M1	AP-2 complex subunit mu	5.26122e+07	4.17039e+07	4.7158e+07	0.000153476	0.000362842	0.000258159	0.000104683	649
P36543	P36543	ATP6V1E1	V-type proton ATPase subunit E 1	8.73656e+07	3.00094e+07	5.86875e+07	0.000254856	0.000261095	0.000257975	3.11962e-06	650
P08559-4	P08559	PDHA1	Isoform 4 of Pyruvate dehydrogenase E1 component subunit alpha, somatic form, mitochondrial	7.79529e+07	3.3088e+07	5.55204e+07	0.000227398	0.00028788	0.000257639	3.02411e-05	651
P49748-3	P49748	ACADVL	Isoform 3 of Very long-chain specific acyl-CoA dehydrogenase, mitochondrial	9.32821e+07	2.78232e+07	6.05527e+07	0.000272115	0.000242074	0.000257095	1.50204e-05	652
Q70UQ0	Q70UQ0	IKBIP	Inhibitor of nuclear factor kappa-B kinase-interacting protein	1.02713e+08	2.45625e+07	6.36379e+07	0.000299627	0.000213704	0.000256666	4.29614e-05	653
P21912	P21912	SDHB	Succinate dehydrogenase [ubiquinone] iron-sulfur subunit, mitochondrial	1.18118e+08	1.93059e+07	6.87121e+07	0.000344565	0.00016797	0.000256267	8.82972e-05	654
Q15365	Q15365	PCBP1	Poly(rC)-binding protein 1	8.28502e+07	3.10547e+07	5.69524e+07	0.000241684	0.00027019	0.000255937	1.4253e-05	655
P47985	P47985	UQCRFS1	Cytochrome b-c1 complex subunit Rieske, mitochondrial	9.5053e+07	2.68333e+07	6.09431e+07	0.000277281	0.000233462	0.000255371	2.19096e-05	656
Q9NZ45	Q9NZ45	CISD1	CDGSH iron-sulfur domain-containing protein 1	8.21523e+07	3.08372e+07	5.64948e+07	0.000239648	0.000268297	0.000253973	1.43246e-05	657
Q15370-2	Q15370	TCEB2	Isoform 2 of Transcription elongation factor B polypeptide 2	8.15929e+07	3.09321e+07	5.62625e+07	0.000238016	0.000269123	0.00025357	1.55535e-05	658
O75534-3	O75534	CSDE1	Isoform 3 of Cold shock domain-containing protein E1	1.00782e+08	2.44801e+07	6.26313e+07	0.000293994	0.000212988	0.000253491	4.05031e-05	659
P00403	P00403	MT-CO2	Cytochrome c oxidase subunit 2	3.36685e+07	4.66444e+07	4.01564e+07	9.82149e-05	0.000405827	0.000252021	0.000153806	660
Q9BZL1	Q9BZL1	UBL5	Ubiquitin-like protein 5	8.41003e+07	2.96777e+07	5.6889e+07	0.000245331	0.000258209	0.00025177	6.43915e-06	661
O15511	O15511	ARPC5	Actin-related protein 2/3 complex subunit 5	9.73329e+07	2.51014e+07	6.12172e+07	0.000283932	0.000218393	0.000251163	3.27691e-05	662
P84157	P84157	MXRA7	Matrix-remodeling-associated protein 7	6.12392e+07	3.70611e+07	4.91501e+07	0.000178642	0.000322448	0.000250545	7.19029e-05	663
O60701	O60701	UGDH	UDP-glucose 6-dehydrogenase	1.12451e+08	1.98615e+07	6.61563e+07	0.000328033	0.000172804	0.000250418	7.76149e-05	664
Q92598	Q92598	HSPH1	Heat shock protein 105 kDa	1.16741e+08	1.8076e+07	6.74084e+07	0.000340546	0.00015727	0.000248908	9.16385e-05	665
P55884-2	P55884	EIF3B	Isoform 2 of Eukaryotic translation initiation factor 3 subunit B	1.01751e+08	2.30713e+07	6.24109e+07	0.000296818	0.00020073	0.000248774	4.8044e-05	666
P63027	P63027	VAMP2	Vesicle-associated membrane protein 2	6.80332e+07	3.42804e+07	5.11568e+07	0.000198461	0.000298254	0.000248358	4.98967e-05	667
O00487	O00487	PSMD14	26S proteasome non-ATPase regulatory subunit 14	1.08301e+08	2.06263e+07	6.44639e+07	0.000315928	0.000179458	0.000247693	6.82353e-05	668
P13804	P13804	ETFA	Electron transfer flavoprotein subunit alpha, mitochondrial	1.05759e+08	2.14169e+07	6.3588e+07	0.000308512	0.000186337	0.000247424	6.10875e-05	669
P22061-2	P22061	PCMT1	Isoform 2 of Protein-L-isoaspartate(D-aspartate) O-methyltransferase	5.49618e+07	3.84051e+07	4.66835e+07	0.00016033	0.000334142	0.000247236	8.69057e-05	670
Q9Y6M1	Q9Y6M1	IGF2BP2	Insulin-like growth factor 2 mRNA-binding protein 2	7.59395e+07	3.12831e+07	5.36113e+07	0.000221525	0.000272177	0.000246851	2.5326e-05	671
P51970	P51970	NDUFA8	NADH dehydrogenase [ubiquinone] 1 alpha subcomplex subunit 8	8.68619e+07	2.75643e+07	5.72131e+07	0.000253387	0.000239822	0.000246604	6.78232e-06	672
Q9P2R7	Q9P2R7	SUCLA2	Succinate--CoA ligase [ADP-forming] subunit beta, mitochondrial	9.19749e+07	2.58284e+07	5.89017e+07	0.000268302	0.000224719	0.00024651	2.17916e-05	673
P10301	P10301	RRAS	Ras-related protein R-Ras	5.14621e+07	3.94015e+07	4.54318e+07	0.000150121	0.000342811	0.000246466	9.63448e-05	674
Q96A33	Q96A33	CCDC47	Coiled-coil domain-containing protein 47	7.81114e+07	3.03839e+07	5.42477e+07	0.00022786	0.000264353	0.000246107	1.82466e-05	675
Q5XKP0	Q5XKP0	MIC13	MICOS complex subunit MIC13	7.47209e+07	3.1421e+07	5.3071e+07	0.00021797	0.000273376	0.000245673	2.77033e-05	676
Q14444	Q14444	CAPRIN1	Caprin-1	7.51971e+07	3.1146e+07	5.31715e+07	0.000219359	0.000270984	0.000245171	2.58124e-05	677
Q9UIJ7	Q9UIJ7	AK3	GTP:AMP phosphotransferase AK3, mitochondrial	1.11161e+08	1.89216e+07	6.50412e+07	0.000324269	0.000164627	0.000244448	7.98211e-05	678
P14406	P14406	COX7A2	Cytochrome c oxidase subunit 7A2, mitochondrial	7.63847e+07	3.05138e+07	5.34493e+07	0.000222823	0.000265483	0.000244153	2.133e-05	679
Q9BTV4	Q9BTV4	TMEM43	Transmembrane protein 43	7.96399e+07	2.9197e+07	5.44185e+07	0.000232319	0.000254027	0.000243173	1.0854e-05	680
Q9UHX1	Q9UHX1	PUF60	Poly(U)-binding-splicing factor PUF60	8.34058e+07	2.79203e+07	5.56631e+07	0.000243305	0.000242919	0.000243112	1.92627e-07	681
O75477	O75477	ERLIN1	Erlin-1	9.25997e+07	2.47214e+07	5.86605e+07	0.000270124	0.000215087	0.000242606	2.75186e-05	682
Q9UBE0	Q9UBE0	SAE1	SUMO-activating enzyme subunit 1	9.56529e+07	2.34354e+07	5.95441e+07	0.000279031	0.000203898	0.000241464	3.75663e-05	683
Q14974	Q14974	KPNB1	Importin subunit beta-1	7.36978e+07	3.07508e+07	5.22243e+07	0.000214985	0.000267546	0.000241265	2.62802e-05	684
Q96HE7	Q96HE7	ERO1A	ERO1-like protein alpha	7.82676e+07	2.89307e+07	5.35991e+07	0.000228316	0.00025171	0.000240013	1.16968e-05	685
P11310-2	P11310	ACADM	Isoform 2 of Medium-chain specific acyl-CoA dehydrogenase, mitochondrial	8.40192e+07	2.69628e+07	5.5491e+07	0.000245094	0.000234588	0.000239841	5.25284e-06	686
Q04760	Q04760	GLO1	Lactoylglutathione lyase	8.64333e+07	2.61275e+07	5.62804e+07	0.000252136	0.000227321	0.000239728	1.24079e-05	687
P05161	P05161	ISG15	Ubiquitin-like protein ISG15	8.85263e+07	2.53536e+07	5.694e+07	0.000258242	0.000220587	0.000239415	1.88272e-05	688
O43143	O43143	DHX15	Pre-mRNA-splicing factor ATP-dependent RNA helicase DHX15	9.60572e+07	2.26903e+07	5.93737e+07	0.00028021	0.000197416	0.000238813	4.13973e-05	689
P18669	P18669	PGAM1	Phosphoglycerate mutase 1	1.22768e+08	1.36124e+07	6.81902e+07	0.000358129	0.000118434	0.000238281	0.000119848	690
Q9BXP5	Q9BXP5	SRRT	Serrate RNA effector molecule homolog	9.29158e+07	2.35471e+07	5.82314e+07	0.000271046	0.00020487	0.000237958	3.30882e-05	691
A8MTT3	A8MTT3	CEBPZOS	Protein CEBPZOS	1.54386e+08	2.85025e+06	7.86182e+07	0.000450363	2.47984e-05	0.000237581	0.000212782	692
P27695	P27695	APEX1	DNA-(apurinic or apyrimidinic site) lyase	1.02523e+08	2.02177e+07	6.13704e+07	0.000299072	0.000175903	0.000237488	6.15843e-05	693
Q96C36	Q96C36	PYCR2	Pyrroline-5-carboxylate reductase 2	1.0477e+08	1.94037e+07	6.20868e+07	0.000305626	0.000168821	0.000237223	6.84027e-05	694
P05362	P05362	ICAM1	Intercellular adhesion molecule 1	7.64257e+07	2.8726e+07	5.25759e+07	0.000222943	0.000249929	0.000236436	1.3493e-05	695
O15143	O15143	ARPC1B	Actin-related protein 2/3 complex subunit 1B	5.19826e+07	3.69036e+07	4.44431e+07	0.00015164	0.000321078	0.000236359	8.47191e-05	696
Q96FJ2	Q96FJ2	DYNLL2	Dynein light chain 2, cytoplasmic	7.22065e+07	3.00902e+07	5.11483e+07	0.000210635	0.000261798	0.000236216	2.55814e-05	697
P63279	P63279	UBE2I	SUMO-conjugating enzyme UBC9	1.10489e+08	1.72448e+07	6.38672e+07	0.000322311	0.000150038	0.000236174	8.61365e-05	698
P29966	P29966	MARCKS	Myristoylated alanine-rich C-kinase substrate	4.15703e+07	4.03133e+07	4.09418e+07	0.000121266	0.000350744	0.000236005	0.000114739	699
P43686	P43686	PSMC4	26S protease regulatory subunit 6B	9.27022e+07	2.31283e+07	5.79153e+07	0.000270423	0.000201226	0.000235825	3.45985e-05	700
Q15942	Q15942	ZYX	Zyxin	3.38001e+07	4.27834e+07	3.82918e+07	9.8599e-05	0.000372235	0.000235417	0.000136818	701
Q9Y383	Q9Y383	LUC7L2	Putative RNA-binding protein Luc7-like 2	7.99369e+07	2.72306e+07	5.35838e+07	0.000233185	0.000236918	0.000235052	1.86646e-06	702
Q13243	Q13243	SRSF5	Serine/arginine-rich splicing factor 5	1.03683e+08	1.92534e+07	6.14684e+07	0.000302457	0.000167513	0.000234985	6.74717e-05	703
P30837	P30837	ALDH1B1	Aldehyde dehydrogenase X, mitochondrial	7.02994e+07	3.03149e+07	5.03071e+07	0.000205072	0.000263753	0.000234412	2.93405e-05	704
O00193	O00193	SMAP	Small acidic protein	8.04235e+07	2.68125e+07	5.3618e+07	0.000234605	0.000233281	0.000233943	6.62089e-07	705
P23526	P23526	AHCY	Adenosylhomocysteinase	9.12095e+07	2.31548e+07	5.71821e+07	0.000266069	0.000201457	0.000233763	3.2306e-05	706
O95831	O95831	AIFM1	Apoptosis-inducing factor 1, mitochondrial	7.37449e+07	2.89379e+07	5.13414e+07	0.000215123	0.000251772	0.000233448	1.83248e-05	707
Q9Y5M8	Q9Y5M8	SRPRB	Signal recognition particle receptor subunit beta	8.31482e+07	2.55209e+07	5.43345e+07	0.000242553	0.000222043	0.000232298	1.02549e-05	708
Q9NPJ3	Q9NPJ3	ACOT13	Acyl-coenzyme A thioesterase 13	5.72267e+07	3.41587e+07	4.56927e+07	0.000166937	0.000297196	0.000232066	6.51293e-05	709
Q07021	Q07021	C1QBP	Complement component 1 Q subcomponent-binding protein, mitochondrial	3.98217e+07	3.98695e+07	3.98456e+07	0.000116165	0.000346883	0.000231524	0.000115359	710
Q8TCT9	Q8TCT9	HM13	Minor histocompatibility antigen H13	6.77457e+07	3.0398e+07	4.90719e+07	0.000197622	0.000264476	0.000231049	3.34269e-05	711
P54727	P54727	RAD23B	UV excision repair protein RAD23 homolog B	7.73001e+07	2.70932e+07	5.21966e+07	0.000225493	0.000235723	0.000230608	5.11458e-06	712
P07919	P07919	UQCRH	Cytochrome b-c1 complex subunit 6, mitochondrial	7.60704e+07	2.74836e+07	5.1777e+07	0.000221906	0.000239119	0.000230513	8.6064e-06	713
Q9Y2B0	Q9Y2B0	CNPY2	Protein canopy homolog 2	1.00089e+08	1.92839e+07	5.96865e+07	0.000291972	0.000167778	0.000229875	6.20969e-05	714
Q96A72	Q96A72	MAGOHB	Protein mago nashi homolog 2	8.63586e+07	2.38833e+07	5.5121e+07	0.000251918	0.000207796	0.000229857	2.20613e-05	715
Q16643-3	Q16643	DBN1	Isoform 3 of Drebrin	7.89831e+07	2.57464e+07	5.23648e+07	0.000230403	0.000224005	0.000227204	3.19918e-06	716
Q15738	Q15738	NSDHL	Sterol-4-alpha-carboxylate 3-dehydrogenase, decarboxylating	8.24373e+07	2.4463e+07	5.34502e+07	0.000240479	0.000212839	0.000226659	1.38202e-05	717
P08648	P08648	ITGA5	Integrin alpha-5	5.06436e+07	3.50096e+07	4.28266e+07	0.000147733	0.000304599	0.000226166	7.84328e-05	718
P61923-4	P61923	COPZ1	Isoform 4 of Coatomer subunit zeta-1	8.12755e+07	2.47363e+07	5.30059e+07	0.00023709	0.000215217	0.000226154	1.09367e-05	719
P50479	P50479	PDLIM4	PDZ and LIM domain protein 4	4.02694e+07	3.83271e+07	3.92983e+07	0.000117471	0.000333463	0.000225467	0.000107996	720
P02786	P02786	TFRC	Transferrin receptor protein 1	8.67615e+07	2.2685e+07	5.47233e+07	0.000253094	0.00019737	0.000225232	2.78621e-05	721
Q9BZZ5-2	Q9BZZ5	API5	Isoform 2 of Apoptosis inhibitor 5	9.04431e+07	2.14367e+07	5.59399e+07	0.000263833	0.000186509	0.000225171	3.86621e-05	722
P46940	P46940	IQGAP1	Ras GTPase-activating-like protein IQGAP1	7.21219e+07	2.75404e+07	4.98312e+07	0.000210388	0.000239614	0.000225001	1.4613e-05	723
P48556	P48556	PSMD8	26S proteasome non-ATPase regulatory subunit 8	1.05439e+08	1.63027e+07	6.08711e+07	0.000307579	0.000141841	0.00022471	8.28691e-05	724
O00505	O00505	KPNA3	Importin subunit alpha-4	7.63499e+07	2.58277e+07	5.10888e+07	0.000222722	0.000224713	0.000223717	9.95443e-07	725
Q86UP2	Q86UP2	KTN1	Kinectin	7.30179e+07	2.67958e+07	4.99068e+07	0.000213002	0.000233135	0.000223069	1.00668e-05	726
Q9HB71	Q9HB71	CACYBP	Calcyclin-binding protein	1.00445e+08	1.75757e+07	5.90105e+07	0.000293011	0.000152916	0.000222963	7.00473e-05	727
P55735-3	P55735	SEC13	Isoform 3 of Protein SEC13 homolog	9.21857e+07	2.02063e+07	5.6196e+07	0.000268916	0.000175804	0.00022236	4.65564e-05	728
Q9UMY4	Q9UMY4	SNX12	Sorting nexin-12	4.91877e+07	3.44817e+07	4.18347e+07	0.000143486	0.000300006	0.000221746	7.826e-05	729
Q15691	Q15691	MAPRE1	Microtubule-associated protein RP/EB family member 1	8.69268e+07	2.17524e+07	5.43396e+07	0.000253576	0.000189256	0.000221416	3.21599e-05	730
Q13217	Q13217	DNAJC3	DnaJ homolog subfamily C member 3	7.87209e+07	2.44363e+07	5.15786e+07	0.000229638	0.000212607	0.000221122	8.51566e-06	731
Q9H9B4	Q9H9B4	SFXN1	Sideroflexin-1	6.96596e+07	2.7394e+07	4.85268e+07	0.000203205	0.00023834	0.000220773	1.75673e-05	732
P53007	P53007	SLC25A1	Tricarboxylate transport protein, mitochondrial	9.17463e+07	1.99873e+07	5.58668e+07	0.000267635	0.000173899	0.000220767	4.6868e-05	733
Q16181	Q16181	39326	Septin-7	5.67943e+07	3.16086e+07	4.42015e+07	0.000165676	0.000275009	0.000220342	5.46668e-05	734
Q96I99	Q96I99	SUCLG2	Succinate--CoA ligase [GDP-forming] subunit beta, mitochondrial	8.08727e+07	2.35121e+07	5.21924e+07	0.000235915	0.000204565	0.00022024	1.5675e-05	735
Q15056	Q15056	EIF4H	Eukaryotic translation initiation factor 4H	6.79782e+07	2.77802e+07	4.78792e+07	0.0001983	0.0002417	0.00022	2.16998e-05	736
O00232	O00232	PSMD12	26S proteasome non-ATPase regulatory subunit 12	8.40913e+07	2.23441e+07	5.32177e+07	0.000245304	0.000194403	0.000219854	2.54505e-05	737
P06744-2	P06744	GPI	Isoform 2 of Glucose-6-phosphate isomerase	8.78588e+07	2.10283e+07	5.44436e+07	0.000256295	0.000182955	0.000219625	3.66696e-05	738
P35659	P35659	DEK	Protein DEK	6.72376e+07	2.79372e+07	4.75874e+07	0.00019614	0.000243066	0.000219603	2.34631e-05	739
O43399-7	O43399	TPD52L2	Isoform 7 of Tumor protein D54	8.50258e+07	2.19028e+07	5.34643e+07	0.00024803	0.000190564	0.000219297	2.8733e-05	740
P30086	P30086	PEBP1	Phosphatidylethanolamine-binding protein 1	7.57613e+07	2.49895e+07	5.03754e+07	0.000221005	0.00021742	0.000219212	1.79219e-06	741
P21589	P21589	NT5E	5'-nucleotidase	8.63863e+07	2.13067e+07	5.38465e+07	0.000251999	0.000185378	0.000218688	3.33105e-05	742
Q9BUF5	Q9BUF5	TUBB6	Tubulin beta-6 chain	6.49009e+07	2.85089e+07	4.67049e+07	0.000189324	0.00024804	0.000218682	2.93584e-05	743
Q9H773	Q9H773	DCTPP1	dCTP pyrophosphatase 1	7.49463e+07		7.49463e+07	0.000218627		0.000218627		744
Q9NR45	Q9NR45	NANS	Sialic acid synthase	6.95621e+07	2.68718e+07	4.8217e+07	0.000202921	0.000233797	0.000218359	1.54378e-05	745
Q96PK6	Q96PK6	RBM14	RNA-binding protein 14	7.75303e+07	2.41493e+07	5.08398e+07	0.000226165	0.00021011	0.000218138	8.02761e-06	746
Q8NBJ5	Q8NBJ5	COLGALT1	Procollagen galactosyltransferase 1	7.25682e+07	2.57293e+07	4.91487e+07	0.00021169	0.000223856	0.000217773	6.08306e-06	747
Q9Y5K8	Q9Y5K8	ATP6V1D	V-type proton ATPase subunit D	3.05692e+07	3.9754e+07	3.51616e+07	8.91739e-05	0.000345878	0.000217526	0.000128352	748
P67870	P67870	CSNK2B	Casein kinase II subunit beta	9.21342e+07	1.88891e+07	5.55117e+07	0.000268766	0.000164344	0.000216555	5.22113e-05	749
P15121	P15121	AKR1B1	Aldose reductase	1.01184e+08	1.58245e+07	5.8504e+07	0.000295165	0.00013768	0.000216422	7.87422e-05	750
O43678	O43678	NDUFA2	NADH dehydrogenase [ubiquinone] 1 alpha subcomplex subunit 2	4.54e+07	3.4314e+07	3.9857e+07	0.000132437	0.000298547	0.000215492	8.30551e-05	751
P31946	P31946	YWHAB	14-3-3 protein beta/alpha	9.8122e+07	1.65431e+07	5.73326e+07	0.000286234	0.000143932	0.000215083	7.11506e-05	752
Q9UBQ0-2	Q9UBQ0	VPS29	Isoform 2 of Vacuolar protein sorting-associated protein 29	6.93097e+07	2.58491e+07	4.75794e+07	0.000202184	0.000224899	0.000213542	1.13573e-05	753
Q96JJ7	Q96JJ7	TMX3	Protein disulfide-isomerase TMX3	7.75516e+07	2.2807e+07	5.01793e+07	0.000226227	0.000198431	0.000212329	1.3898e-05	754
Q92879-4	Q92879	CELF1	Isoform 4 of CUGBP Elav-like family member 1	8.52326e+07	2.02147e+07	5.27237e+07	0.000248633	0.000175877	0.000212255	3.63782e-05	755
Q14192	Q14192	FHL2	Four and a half LIM domains protein 2	3.80352e+07	3.5888e+07	3.69616e+07	0.000110953	0.000312242	0.000211597	0.000100644	756
Q9Y3A5	Q9Y3A5	SBDS	Ribosome maturation protein SBDS	6.70551e+07	2.60863e+07	4.65707e+07	0.000195608	0.000226962	0.000211285	1.56774e-05	757
O43676	O43676	NDUFB3	NADH dehydrogenase [ubiquinone] 1 beta subcomplex subunit 3	9.07195e+07	1.81202e+07	5.44198e+07	0.000264639	0.000157653	0.000211146	5.3493e-05	758
Q32P28-3	Q32P28	P3H1	Isoform 3 of Prolyl 3-hydroxylase 1	5.95394e+07	2.85331e+07	4.40362e+07	0.000173683	0.000248251	0.000210967	3.72836e-05	759
P28074	P28074	PSMB5	Proteasome subunit beta type-5	8.12561e+07	2.12167e+07	5.12364e+07	0.000237034	0.000184595	0.000210814	2.62194e-05	760
Q92890-1	Q92890	UFD1L	Isoform Long of Ubiquitin fusion degradation protein 1 homolog	6.43969e+07	2.67988e+07	4.55978e+07	0.000187853	0.000233161	0.000210507	2.26541e-05	761
Q9HB40	Q9HB40	SCPEP1	Retinoid-inducible serine carboxypeptidase	4.88802e+07	3.19494e+07	4.04148e+07	0.000142589	0.000277974	0.000210282	6.76923e-05	762
Q9Y262	Q9Y262	EIF3L	Eukaryotic translation initiation factor 3 subunit L	6.3536e+07	2.69265e+07	4.52312e+07	0.000185342	0.000234273	0.000209807	2.44655e-05	763
Q9Y5J9	Q9Y5J9	TIMM8B	Mitochondrial import inner membrane translocase subunit Tim8 B	7.57332e+07	2.28258e+07	4.92795e+07	0.000220923	0.000198595	0.000209759	1.11641e-05	764
P27816	P27816	MAP4	Microtubule-associated protein 4	6.15097e+07	2.75816e+07	4.45456e+07	0.000179431	0.000239972	0.000209702	3.02706e-05	765
Q86TL0	Q86TL0	ATG4D	Cysteine protease ATG4D		2.40668e+07	2.40668e+07		0.000209392	0.000209392	0.000209392	766
Q02218	Q02218	OGDH	2-oxoglutarate dehydrogenase, mitochondrial	5.92053e+07	2.82383e+07	4.37218e+07	0.000172709	0.000245686	0.000209197	3.64885e-05	767
P08195-4	P08195	SLC3A2	Isoform 4 of 4F2 cell-surface antigen heavy chain	8.74954e+07	1.86788e+07	5.30871e+07	0.000255235	0.000162514	0.000208874	4.63602e-05	768
P62993	P62993	GRB2	Growth factor receptor-bound protein 2	8.31014e+07	2.00462e+07	5.15738e+07	0.000242417	0.000174411	0.000208414	3.40028e-05	769
Q13148	Q13148	TARDBP	TAR DNA-binding protein 43	9.06582e+07	1.74587e+07	5.40585e+07	0.000264461	0.000151899	0.00020818	5.6281e-05	770
Q9P0U1	Q9P0U1	TOMM7	Mitochondrial import receptor subunit TOM7 homolog	8.1373e+07	2.0507e+07	5.094e+07	0.000237375	0.00017842	0.000207897	2.94774e-05	771
Q9UBR2	Q9UBR2	CTSZ	Cathepsin Z	4.97114e+07	3.10411e+07	4.03762e+07	0.000145014	0.000270071	0.000207543	6.25285e-05	772
Q99536	Q99536	VAT1	Synaptic vesicle membrane protein VAT-1 homolog	5.41063e+07	2.90822e+07	4.15943e+07	0.000157835	0.000253028	0.000205431	4.75967e-05	773
P18085	P18085	ARF4	ADP-ribosylation factor 4	3.94617e+07	3.39372e+07	3.66995e+07	0.000115114	0.000295269	0.000205192	9.00773e-05	774
P17900	P17900	GM2A	Ganglioside GM2 activator	6.9398e+07	2.38341e+07	4.66161e+07	0.000202442	0.000207367	0.000204905	2.46239e-06	775
O95168	O95168	NDUFB4	NADH dehydrogenase [ubiquinone] 1 beta subcomplex subunit 4	1.01012e+08	1.32329e+07	5.71227e+07	0.000294665	0.000115132	0.000204899	8.97666e-05	776
P15311	P15311	EZR	Ezrin	9.28012e+07	1.59845e+07	5.43928e+07	0.000270712	0.000139072	0.000204892	6.58199e-05	777
P32322-3	P32322	PYCR1	Isoform 3 of Pyrroline-5-carboxylate reductase 1, mitochondrial	7.55332e+07	2.17406e+07	4.86369e+07	0.000220339	0.000189153	0.000204746	1.55932e-05	778
O96000	O96000	NDUFB10	NADH dehydrogenase [ubiquinone] 1 beta subcomplex subunit 10	5.7119e+07	2.78789e+07	4.2499e+07	0.000166623	0.000242559	0.000204591	3.79681e-05	779
O75494	O75494	SRSF10	Serine/arginine-rich splicing factor 10	7.13106e+07	2.3095e+07	4.72028e+07	0.000208021	0.000200936	0.000204479	3.54247e-06	780
Q9C005	Q9C005	DPY30	Protein dpy-30 homolog	7.95543e+07	2.03269e+07	4.99406e+07	0.000232069	0.000176853	0.000204461	2.76083e-05	781
P43034	P43034	PAFAH1B1	Platelet-activating factor acetylhydrolase IB subunit alpha	3.89184e+07	3.38568e+07	3.63876e+07	0.00011353	0.000294569	0.000204049	9.05197e-05	782
Q09028	Q09028	RBBP4	Histone-binding protein RBBP4	1.05979e+08	1.13011e+07	5.86399e+07	0.000309152	9.83249e-05	0.000203739	0.000105414	783
O95782	O95782	AP2A1	AP-2 complex subunit alpha-1	4.96148e+07	3.01659e+07	3.98903e+07	0.000144732	0.000262457	0.000203594	5.88623e-05	784
P56378-2	P56378	MP68	Isoform 2 of 6.8 kDa mitochondrial proteolipid	6.83227e+07	2.37855e+07	4.60541e+07	0.000199305	0.000206944	0.000203125	3.81946e-06	785
P07437	P07437	TUBB	Tubulin beta chain	4.01387e+07	3.32113e+07	3.6675e+07	0.000117089	0.000288953	0.000203021	8.59318e-05	786
Q969X5	Q969X5	ERGIC1	Endoplasmic reticulum-Golgi intermediate compartment protein 1	5.1179e+07	2.95083e+07	4.03436e+07	0.000149295	0.000256735	0.000203015	5.37198e-05	787
O75822	O75822	EIF3J	Eukaryotic translation initiation factor 3 subunit J	4.71028e+07	3.07495e+07	3.89261e+07	0.000137404	0.000267534	0.000202469	6.5065e-05	788
Q08431	Q08431	MFGE8	Lactadherin	2.20205e+07	3.90101e+07	3.05153e+07	6.42364e-05	0.000339405	0.000201821	0.000137585	789
Q13868	Q13868	EXOSC2	Exosome complex component RRP4	1.20962e+08	5.79806e+06	6.338e+07	0.00035286	5.04457e-05	0.000201653	0.000151207	790
P08174-7	P08174	CD55	Isoform 7 of Complement decay-accelerating factor	4.37808e+07	3.15854e+07	3.76831e+07	0.000127714	0.000274807	0.00020126	7.35465e-05	791
O95816	O95816	BAG2	BAG family molecular chaperone regulator 2	7.67517e+07	2.04981e+07	4.86249e+07	0.000223894	0.000178342	0.000201118	2.27758e-05	792
P61769	P61769	B2M	Beta-2-microglobulin	7.42878e+07	2.1107e+07	4.76974e+07	0.000216706	0.00018364	0.000200173	1.6533e-05	793
P18031	P18031	PTPN1	Tyrosine-protein phosphatase non-receptor type 1	8.25585e+07	1.83202e+07	5.04393e+07	0.000240833	0.000159394	0.000200113	4.07195e-05	794
P84243	P84243	H3F3A	Histone H3.3	9.23237e+07	1.48463e+07	5.3585e+07	0.000269319	0.00012917	0.000199244	7.00748e-05	795
Q99460	Q99460	PSMD1	26S proteasome non-ATPase regulatory subunit 1	7.24388e+07	2.12825e+07	4.68606e+07	0.000211312	0.000185167	0.00019824	1.30725e-05	796
Q13242	Q13242	SRSF9	Serine/arginine-rich splicing factor 9	8.23148e+07	1.76625e+07	4.99887e+07	0.000240122	0.000153672	0.000196897	4.32251e-05	797
Q92804	Q92804	TAF15	TATA-binding protein-associated factor 2N	6.16547e+07	2.45704e+07	4.31125e+07	0.000179854	0.000213773	0.000196814	1.69597e-05	798
Q13011	Q13011	ECH1	Delta(3,5)-Delta(2,4)-dienoyl-CoA isomerase, mitochondrial	8.70344e+07	1.58797e+07	5.1457e+07	0.00025389	0.00013816	0.000196025	5.78648e-05	799
Q14764	Q14764	MVP	Major vault protein	5.38662e+07	2.69004e+07	4.03833e+07	0.000157134	0.000234046	0.00019559	3.84558e-05	800
O94979-8	O94979	SEC31A	Isoform 8 of Protein transport protein Sec31A	7.27481e+07	2.05134e+07	4.66308e+07	0.000212215	0.000178476	0.000195345	1.68695e-05	801
Q15029	Q15029	EFTUD2	116 kDa U5 small nuclear ribonucleoprotein component	5.82551e+07	2.53726e+07	4.18138e+07	0.000169937	0.000220753	0.000195345	2.5408e-05	802
O00567	O00567	NOP56	Nucleolar protein 56	6.80451e+07	2.197e+07	4.50076e+07	0.000198496	0.000191149	0.000194822	3.67335e-06	803
P09038	P09038	FGF2	Fibroblast growth factor 2	1.07065e+08	8.8308e+06	5.79479e+07	0.000312321	7.68319e-05	0.000194577	0.000117745	804
P31689	P31689	DNAJA1	DnaJ homolog subfamily A member 1	8.61563e+07	1.5655e+07	5.09057e+07	0.000251328	0.000136205	0.000193767	5.75615e-05	805
Q9UHG3	Q9UHG3	PCYOX1	Prenylcysteine oxidase 1	5.19067e+07	2.70545e+07	3.94806e+07	0.000151418	0.000235386	0.000193402	4.19841e-05	806
Q00688	Q00688	FKBP3	Peptidyl-prolyl cis-trans isomerase FKBP3	7.29761e+07	1.99669e+07	4.64715e+07	0.00021288	0.000173721	0.0001933	1.95797e-05	807
Q9Y678	Q9Y678	COPG1	Coatomer subunit gamma-1	5.92478e+07	2.45251e+07	4.18864e+07	0.000172833	0.000213379	0.000193106	2.0273e-05	808
Q99805	Q99805	TM9SF2	Transmembrane 9 superfamily member 2	6.07347e+07	2.39305e+07	4.23326e+07	0.00017717	0.000208206	0.000192688	1.55178e-05	809
P49458	P49458	SRP9	Signal recognition particle 9 kDa protein	7.96336e+07	1.75542e+07	4.85939e+07	0.000232301	0.00015273	0.000192515	3.97855e-05	810
P20618	P20618	PSMB1	Proteasome subunit beta type-1	3.0148e+07	3.41132e+07	3.21306e+07	8.79453e-05	0.0002968	0.000192373	0.000104427	811
Q96SL4	Q96SL4	GPX7	Glutathione peroxidase 7	4.1877e+07	3.01442e+07	3.60106e+07	0.00012216	0.000262268	0.000192214	7.0054e-05	812
O00425	O00425	IGF2BP3	Insulin-like growth factor 2 mRNA-binding protein 3	4.98034e+07	2.73996e+07	3.86015e+07	0.000145282	0.000238388	0.000191835	4.65529e-05	813
P62877	P62877	RBX1	E3 ubiquitin-protein ligase RBX1	5.18757e+07	2.65698e+07	3.92228e+07	0.000151328	0.000231169	0.000191248	3.99209e-05	814
P46459	P46459	NSF	Vesicle-fusing ATPase	5.46651e+07	2.56003e+07	4.01327e+07	0.000159464	0.000222734	0.000191099	3.16347e-05	815
P78527	P78527	PRKDC	DNA-dependent protein kinase catalytic subunit	5.29051e+07	2.61896e+07	3.95473e+07	0.00015433	0.000227861	0.000191096	3.67654e-05	816
O15347	O15347	HMGB3	High mobility group protein B3	8.75307e+07	1.45616e+07	5.10462e+07	0.000255337	0.000126692	0.000191015	6.43226e-05	817
Q13813	Q13813	SPTAN1	Spectrin alpha chain, non-erythrocytic 1	6.20194e+07	2.28843e+07	4.24519e+07	0.000180918	0.000199104	0.000190011	9.09288e-06	818
Q9UN86	Q9UN86	G3BP2	Ras GTPase-activating protein-binding protein 2	5.36748e+07	2.56521e+07	3.96634e+07	0.000156576	0.000223185	0.00018988	3.33046e-05	819
Q13442	Q13442	PDAP1	28 kDa heat- and acid-stable phosphoprotein	8.15897e+07	1.62902e+07	4.89399e+07	0.000238007	0.000141732	0.000189869	4.81376e-05	820
P35613	P35613	BSG	Basigin	3.48457e+07	3.16195e+07	3.32326e+07	0.000101649	0.000275104	0.000188377	8.67276e-05	821
P26196	P26196	DDX6	Probable ATP-dependent RNA helicase DDX6	6.30496e+07	2.21164e+07	4.2583e+07	0.000183923	0.000192422	0.000188173	4.24963e-06	822
Q16851	Q16851	UGP2	UTP--glucose-1-phosphate uridylyltransferase	5.60542e+07	2.4424e+07	4.02391e+07	0.000163517	0.0002125	0.000188008	2.44916e-05	823
P06730-2	P06730	EIF4E	Isoform 2 of Eukaryotic translation initiation factor 4E	6.98408e+07	1.9799e+07	4.48199e+07	0.000203734	0.000172261	0.000187997	1.57367e-05	824
O00159-3	O00159	MYO1C	Isoform 3 of Unconventional myosin-Ic	4.53291e+07	2.78829e+07	3.6606e+07	0.00013223	0.000242594	0.000187412	5.51817e-05	825
Q9NZI8	Q9NZI8	IGF2BP1	Insulin-like growth factor 2 mRNA-binding protein 1	7.3846e+07	1.82679e+07	4.60569e+07	0.000215418	0.000158938	0.000187178	2.82395e-05	826
Q7L2H7	Q7L2H7	EIF3M	Eukaryotic translation initiation factor 3 subunit M	4.8959e+07	2.6604e+07	3.77815e+07	0.000142819	0.000231467	0.000187143	4.43236e-05	827
P28331-2	P28331	NDUFS1	Isoform 2 of NADH-ubiquinone oxidoreductase 75 kDa subunit, mitochondrial	6.68148e+07	2.0531e+07	4.36729e+07	0.000194907	0.000178629	0.000186768	8.13909e-06	828
P09874	P09874	PARP1	Poly [ADP-ribose] polymerase 1	7.42857e+07	1.80102e+07	4.61479e+07	0.0002167	0.000156696	0.000186698	3.00018e-05	829
O43684	O43684	BUB3	Mitotic checkpoint protein BUB3	8.64068e+07	1.39203e+07	5.01635e+07	0.000252059	0.000121112	0.000186586	6.54732e-05	830
P61960	P61960	UFM1	Ubiquitin-fold modifier 1	5.66548e+07	2.3892e+07	4.02734e+07	0.000165269	0.000207871	0.00018657	2.13014e-05	831
P49840	P49840	GSK3A	Glycogen synthase kinase-3 alpha	1.11152e+07	3.91286e+07	2.51219e+07	3.24242e-05	0.000340436	0.00018643	0.000154006	832
P05023-4	P05023	ATP1A1	Isoform 4 of Sodium/potassium-transporting ATPase subunit alpha-1	6.56664e+07	2.07925e+07	4.32295e+07	0.000191557	0.000180904	0.00018623	5.32624e-06	833
Q16658	Q16658	FSCN1	Fascin	5.13634e+07	2.55444e+07	3.84539e+07	0.000149833	0.000222247	0.00018604	3.62071e-05	834
Q99459	Q99459	CDC5L	Cell division cycle 5-like protein	4.92309e+07	2.61552e+07	3.7693e+07	0.000143612	0.000227562	0.000185587	4.19746e-05	835
Q02978	Q02978	SLC25A11	Mitochondrial 2-oxoglutarate/malate carrier protein	5.25738e+07	2.50307e+07	3.88023e+07	0.000153364	0.000217778	0.000185571	3.22072e-05	836
P60228	P60228	EIF3E	Eukaryotic translation initiation factor 3 subunit E	4.40227e+07	2.77701e+07	3.58964e+07	0.00012842	0.000241612	0.000185016	5.65962e-05	837
O43169	O43169	CYB5B	Cytochrome b5 type B	5.43855e+07	2.40855e+07	3.92355e+07	0.000158649	0.000209554	0.000184102	2.54526e-05	838
P50402	P50402	EMD	Emerin	5.74624e+07	2.2936e+07	4.01992e+07	0.000167625	0.000199553	0.000183589	1.59643e-05	839
O43837	O43837	IDH3B	Isocitrate dehydrogenase [NAD] subunit beta, mitochondrial	7.40968e+07	1.73565e+07	4.57266e+07	0.000216149	0.000151009	0.000183579	3.25699e-05	840
P61019	P61019	RAB2A	Ras-related protein Rab-2A	4.6312e+07	2.65773e+07	3.64446e+07	0.000135098	0.000231234	0.000183166	4.80682e-05	841
O14548	O14548	COX7A2L	Cytochrome c oxidase subunit 7A-related protein, mitochondrial	6.87851e+07	1.89606e+07	4.38728e+07	0.000200654	0.000164965	0.00018281	1.78444e-05	842
P31040	P31040	SDHA	Succinate dehydrogenase [ubiquinone] flavoprotein subunit, mitochondrial	7.48213e+07	1.69178e+07	4.58696e+07	0.000218263	0.000147193	0.000182728	3.5535e-05	843
P21281	P21281	ATP6V1B2	V-type proton ATPase subunit B, brain isoform	6.53229e+07	2.00546e+07	4.26888e+07	0.000190555	0.000174484	0.000182519	8.03519e-06	844
O75347	O75347	TBCA	Tubulin-specific chaperone A	9.90958e+07	8.7228e+06	5.39093e+07	0.000289074	7.58923e-05	0.000182483	0.000106591	845
O60568	O60568	PLOD3	Procollagen-lysine,2-oxoglutarate 5-dioxygenase 3	5.66387e+07	2.27998e+07	3.97193e+07	0.000165222	0.000198369	0.000181795	1.65733e-05	846
P08473	P08473	MME	Neprilysin	4.8734e+07	2.54086e+07	3.70713e+07	0.000142163	0.000221066	0.000181615	3.94518e-05	847
O95571	O95571	ETHE1	Persulfide dioxygenase ETHE1, mitochondrial	4.79583e+07	2.55727e+07	3.67655e+07	0.0001399	0.000222494	0.000181197	4.1297e-05	848
O60664	O60664	PLIN3	Perilipin-3	5.84889e+07	2.19254e+07	4.02072e+07	0.000170619	0.000190761	0.00018069	1.00708e-05	849
P61088	P61088	UBE2N	Ubiquitin-conjugating enzyme E2 N	8.10548e+07	1.43188e+07	4.76868e+07	0.000236446	0.00012458	0.000180513	5.59331e-05	850
P31150	P31150	GDI1	Rab GDP dissociation inhibitor alpha	6.9564e+07	1.80357e+07	4.37998e+07	0.000202926	0.000156918	0.000179922	2.30041e-05	851
P54652	P54652	HSPA2	Heat shock-related 70 kDa protein 2	5.27173e+07	2.36209e+07	3.81691e+07	0.000153783	0.000205513	0.000179648	2.58649e-05	852
P68366	P68366	TUBA4A	Tubulin alpha-4A chain	3.31602e+07	3.01758e+07	3.1668e+07	9.67323e-05	0.000262543	0.000179638	8.29054e-05	853
Q13557-11	Q13557	CAMK2D	Isoform Delta 11 of Calcium/calmodulin-dependent protein kinase type II subunit delta	5.02846e+07	2.44203e+07	3.73524e+07	0.000146686	0.000212467	0.000179577	3.28904e-05	854
P27105	P27105	STOM	Erythrocyte band 7 integral membrane protein	4.71589e+07	2.53889e+07	3.62739e+07	0.000137568	0.000220894	0.000179231	4.16632e-05	855
Q9Y6C2	Q9Y6C2	EMILIN1	EMILIN-1	2.86245e+07	3.15868e+07	3.01057e+07	8.35011e-05	0.000274819	0.00017916	9.56591e-05	856
Q9Y221	Q9Y221	NIP7	60S ribosome subunit biogenesis protein NIP7 homolog	6.71682e+07	1.85935e+07	4.28808e+07	0.000195938	0.000161772	0.000178855	1.70829e-05	857
O75844	O75844	ZMPSTE24	CAAX prenyl protease 1 homolog	7.01341e+07	1.74759e+07	4.3805e+07	0.000204589	0.000152048	0.000178319	2.62706e-05	858
Q13200	Q13200	PSMD2	26S proteasome non-ATPase regulatory subunit 2	6.23329e+07	2.00867e+07	4.12098e+07	0.000181832	0.000174763	0.000178298	3.53464e-06	859
Q56VL3	Q56VL3	OCIAD2	OCIA domain-containing protein 2	2.63943e+07	3.21029e+07	2.92486e+07	7.69953e-05	0.00027931	0.000178152	0.000101157	860
Q92504	Q92504	SLC39A7	Zinc transporter SLC39A7	8.00017e+07	1.41014e+07	4.70516e+07	0.000233375	0.000122689	0.000178032	5.53429e-05	861
Q7L1Q6-3	Q7L1Q6	BZW1	Isoform 3 of Basic leucine zipper and W2 domain-containing protein 1	5.90308e+07	2.10566e+07	4.00437e+07	0.0001722	0.000183202	0.000177701	5.50102e-06	862
P36776	P36776	LONP1	Lon protease homolog, mitochondrial	5.0343e+07	2.3917e+07	3.713e+07	0.000146857	0.000208089	0.000177473	3.06161e-05	863
Q9Y265	Q9Y265	RUVBL1	RuvB-like 1	5.38605e+07	2.2731e+07	3.82957e+07	0.000157117	0.000197769	0.000177443	2.0326e-05	864
P98095-2	P98095	FBLN2	Isoform 2 of Fibulin-2	1.67887e+07	3.51429e+07	2.59658e+07	4.89745e-05	0.000305758	0.000177367	0.000128392	865
Q9Y2R0	Q9Y2R0	COA3	Cytochrome c oxidase assembly factor 3 homolog, mitochondrial	7.21727e+07	1.65034e+07	4.4338e+07	0.000210536	0.000143587	0.000177061	3.34747e-05	866
Q16836-2	Q16836	HADH	Isoform 2 of Hydroxyacyl-coenzyme A dehydrogenase, mitochondrial	5.49245e+07	2.22722e+07	3.85984e+07	0.000160221	0.000193778	0.000177	1.67786e-05	867
Q14247	Q14247	CTTN	Src substrate cortactin	5.16043e+07	2.32801e+07	3.74422e+07	0.000150536	0.000202547	0.000176542	2.60058e-05	868
Q13435	Q13435	SF3B2	Splicing factor 3B subunit 2	5.6138e+07	2.16937e+07	3.89158e+07	0.000163761	0.000188745	0.000176253	1.24916e-05	869
Q96EP5	Q96EP5	DAZAP1	DAZ-associated protein 1	6.42222e+07	1.88571e+07	4.15396e+07	0.000187344	0.000164065	0.000175704	1.16395e-05	870
Q9Y394	Q9Y394	DHRS7	Dehydrogenase/reductase SDR family member 7	4.75221e+07	2.43558e+07	3.59389e+07	0.000138628	0.000211906	0.000175267	3.66391e-05	871
P80303-2	P80303	NUCB2	Isoform 2 of Nucleobindin-2	5.11622e+07	2.30904e+07	3.71263e+07	0.000149246	0.000200897	0.000175071	2.58253e-05	872
Q9UK45	Q9UK45	LSM7	U6 snRNA-associated Sm-like protein LSm7	4.70086e+07	2.43631e+07	3.56859e+07	0.00013713	0.00021197	0.00017455	3.74202e-05	873
Q14011	Q14011	CIRBP	Cold-inducible RNA-binding protein	4.52892e+07	2.48063e+07	3.50478e+07	0.000132114	0.000215826	0.00017397	4.18561e-05	874
O76003	O76003	GLRX3	Glutaredoxin-3	5.24736e+07	2.22739e+07	3.73737e+07	0.000153072	0.000193793	0.000173432	2.03605e-05	875
Q9BPX5	Q9BPX5	ARPC5L	Actin-related protein 2/3 complex subunit 5-like protein	3.66613e+07	2.75323e+07	3.20968e+07	0.000106945	0.000239543	0.000173244	6.62991e-05	876
Q15393	Q15393	SF3B3	Splicing factor 3B subunit 3	4.38088e+07	2.50084e+07	3.44086e+07	0.000127795	0.000217584	0.00017269	4.48942e-05	877
O15400	O15400	STX7	Syntaxin-7	3.94293e+07	2.64723e+07	3.29508e+07	0.00011502	0.000230321	0.00017267	5.76504e-05	878
O43242	O43242	PSMD3	26S proteasome non-ATPase regulatory subunit 3	5.79032e+07	2.02737e+07	3.90885e+07	0.000168911	0.00017639	0.00017265	3.73987e-06	879
P45973	P45973	CBX5	Chromobox protein homolog 5	4.54335e+07	2.43453e+07	3.48894e+07	0.000132535	0.000211815	0.000172175	3.96401e-05	880
Q9Y3B4	Q9Y3B4	SF3B6	Splicing factor 3B subunit 6	3.82853e+07	2.67346e+07	3.25099e+07	0.000111683	0.000232603	0.000172143	6.04602e-05	881
O95182	O95182	NDUFA7	NADH dehydrogenase [ubiquinone] 1 alpha subcomplex subunit 7	6.53072e+07	1.75695e+07	4.14383e+07	0.000190509	0.000152862	0.000171685	1.88233e-05	882
P61619	P61619	SEC61A1	Protein transport protein Sec61 subunit alpha isoform 1	2.65219e+07	3.05632e+07	2.85426e+07	7.73675e-05	0.000265914	0.000171641	9.42731e-05	883
Q9NX40	Q9NX40	OCIAD1	OCIA domain-containing protein 1	5.99574e+07	1.91902e+07	3.95738e+07	0.000174903	0.000166963	0.000170933	3.96984e-06	884
Q10471	Q10471	GALNT2	Polypeptide N-acetylgalactosaminyltransferase 2	4.8253e+07	2.30946e+07	3.56738e+07	0.00014076	0.000200933	0.000170846	3.00867e-05	885
Q6UVK1	Q6UVK1	CSPG4	Chondroitin sulfate proteoglycan 4	4.10976e+07	2.54327e+07	3.32651e+07	0.000119886	0.000221275	0.000170581	5.06945e-05	886
Q13505	Q13505	MTX1	Metaxin-1	1.02652e+08	4.79345e+06	5.37226e+07	0.000299447	4.17051e-05	0.000170576	0.000128871	887
Q9Y3Y2-3	Q9Y3Y2	CHTOP	Isoform 2 of Chromatin target of PRMT1 protein	5.01535e+07	2.23224e+07	3.6238e+07	0.000146304	0.000194215	0.000170259	2.39554e-05	888
P14868	P14868	DARS	Aspartate--tRNA ligase, cytoplasmic	6.15642e+07	1.84601e+07	4.00121e+07	0.00017959	0.000160611	0.0001701	9.48962e-06	889
Q8TDN6	Q8TDN6	BRIX1	Ribosome biogenesis protein BRX1 homolog	4.48836e+07	2.40268e+07	3.44552e+07	0.000130931	0.000209044	0.000169987	3.90565e-05	890
Q9NYU2	Q9NYU2	UGGT1	UDP-glucose:glycoprotein glucosyltransferase 1	6.30692e+07	1.78944e+07	4.04818e+07	0.00018398	0.000155689	0.000169835	1.41455e-05	891
O95793	O95793	STAU1	Double-stranded RNA-binding protein Staufen homolog 1	4.66361e+07	2.32255e+07	3.49308e+07	0.000136043	0.000202072	0.000169058	3.30146e-05	892
P04062	P04062	GBA	Glucosylceramidase	5.43427e+07	2.06405e+07	3.74916e+07	0.000158524	0.000179582	0.000169053	1.05289e-05	893
P63272	P63272	SUPT4H1	Transcription elongation factor SPT4	6.13213e+07	1.82881e+07	3.98047e+07	0.000178881	0.000159115	0.000168998	9.88319e-06	894
O60831	O60831	PRAF2	PRA1 family protein 2	3.74562e+07	2.62571e+07	3.18566e+07	0.000109264	0.000228448	0.000168856	5.9592e-05	895
Q14318-2	Q14318	FKBP8	Isoform 2 of Peptidyl-prolyl cis-trans isomerase FKBP8	5.46423e+07	2.04633e+07	3.75528e+07	0.000159398	0.00017804	0.000168719	9.3208e-06	896
P84095	P84095	RHOG	Rho-related GTP-binding protein RhoG	6.42034e+07	1.72471e+07	4.07252e+07	0.000187289	0.000150057	0.000168673	1.86157e-05	897
Q9Y5J7	Q9Y5J7	TIMM9	Mitochondrial import inner membrane translocase subunit Tim9	3.50786e+07	2.69204e+07	3.09995e+07	0.000102328	0.000234219	0.000168274	6.59455e-05	898
Q92520	Q92520	FAM3C	Protein FAM3C	6.23412e+07	1.76421e+07	3.99916e+07	0.000181857	0.000153494	0.000167675	1.41814e-05	899
P61289-2	P61289	PSME3	Isoform 2 of Proteasome activator complex subunit 3	7.97619e+07	1.1746e+07	4.57539e+07	0.000232675	0.000102195	0.000167435	6.52397e-05	900
Q01085-2	Q01085	TIAL1	Isoform 2 of Nucleolysin TIAR	6.73295e+07	1.58641e+07	4.15968e+07	0.000196408	0.000138025	0.000167216	2.91917e-05	901
Q9Y3C6	Q9Y3C6	PPIL1	Peptidyl-prolyl cis-trans isomerase-like 1	6.63884e+07	1.61599e+07	4.12741e+07	0.000193663	0.000140598	0.000167131	2.65322e-05	902
O43615	O43615	TIMM44	Mitochondrial import inner membrane translocase subunit TIM44	5.29853e+07	2.06243e+07	3.68048e+07	0.000154564	0.00017944	0.000167002	1.24379e-05	903
Q9UKY7	Q9UKY7	CDV3	Protein CDV3 homolog	7.20095e+07	1.42286e+07	4.31191e+07	0.00021006	0.000123795	0.000166928	4.31324e-05	904
P30153	P30153	PPP2R1A	Serine/threonine-protein phosphatase 2A 65 kDa regulatory subunit A alpha isoform	5.84565e+07	1.87375e+07	3.8597e+07	0.000170524	0.000163024	0.000166774	3.75013e-06	905
P49419-2	P49419	ALDH7A1	Isoform 2 of Alpha-aminoadipic semialdehyde dehydrogenase	4.13907e+07	2.43147e+07	3.28527e+07	0.000120742	0.000211548	0.000166145	4.54033e-05	906
Q6UXN9	Q6UXN9	WDR82	WD repeat-containing protein 82	4.568e+07	2.28328e+07	3.42564e+07	0.000133254	0.000198655	0.000165954	3.27007e-05	907
P61158	P61158	ACTR3	Actin-related protein 3	4.10637e+07	2.4379e+07	3.27213e+07	0.000119788	0.000212108	0.000165948	4.61602e-05	908
Q01082	Q01082	SPTBN1	Spectrin beta chain, non-erythrocytic 1	5.90889e+07	1.83262e+07	3.87075e+07	0.000172369	0.000159446	0.000165907	6.46176e-06	909
P52815	P52815	MRPL12	39S ribosomal protein L12, mitochondrial	3.95307e+07	2.48347e+07	3.21827e+07	0.000115316	0.000216073	0.000165694	5.03787e-05	910
P62310	P62310	LSM3	U6 snRNA-associated Sm-like protein LSm3	6.77393e+07	1.53575e+07	4.15484e+07	0.000197604	0.000133617	0.00016561	3.19934e-05	911
P62745	P62745	RHOB	Rho-related GTP-binding protein RhoB	5.50475e+07	1.95312e+07	3.72894e+07	0.00016058	0.00016993	0.000165255	4.67488e-06	912
Q8N183	Q8N183	NDUFAF2	Mimitin, mitochondrial	7.07412e+07	1.41902e+07	4.24657e+07	0.00020636	0.000123461	0.000164911	4.14495e-05	913
P51114	P51114	FXR1	Fragile X mental retardation syndrome-related protein 1	6.15257e+07	1.72585e+07	3.93921e+07	0.000179478	0.000150157	0.000164817	1.46606e-05	914
P16152	P16152	CBR1	Carbonyl reductase [NADPH] 1	6.88603e+07	1.47917e+07	4.1826e+07	0.000200874	0.000128694	0.000164784	3.60895e-05	915
O75251	O75251	NDUFS7	NADH dehydrogenase [ubiquinone] iron-sulfur protein 7, mitochondrial	4.38514e+07	2.31222e+07	3.34868e+07	0.00012792	0.000201173	0.000164546	3.66266e-05	916
P10515	P10515	DLAT	Dihydrolipoyllysine-residue acetyltransferase component of pyruvate dehydrogenase complex, mitochondrial	5.29153e+07	1.99055e+07	3.64104e+07	0.00015436	0.000173187	0.000163773	9.41317e-06	917
P06865	P06865	HEXA	Beta-hexosaminidase subunit alpha	5.03149e+07	2.06994e+07	3.55071e+07	0.000146774	0.000180094	0.000163434	1.66599e-05	918
Q12904-2	Q12904	AIMP1	Isoform 2 of Aminoacyl tRNA synthase complex-interacting multifunctional protein 1	6.94912e+07	1.40937e+07	4.17925e+07	0.000202714	0.000122622	0.000162668	4.00461e-05	919
P49756	P49756	RBM25	RNA-binding protein 25	7.114e+07	1.35057e+07	4.23229e+07	0.000207524	0.000117506	0.000162515	4.50091e-05	920
P49189	P49189	ALDH9A1	4-trimethylaminobutyraldehyde dehydrogenase	7.41166e+07	1.24819e+07	4.32993e+07	0.000216207	0.000108598	0.000162403	5.38045e-05	921
O60220	O60220	TIMM8A	Mitochondrial import inner membrane translocase subunit Tim8 A	6.07213e+07	1.6712e+07	3.87167e+07	0.000177131	0.000145402	0.000161267	1.58646e-05	922
P27694	P27694	RPA1	Replication protein A 70 kDa DNA-binding subunit	4.48093e+07	2.19314e+07	3.33704e+07	0.000130714	0.000190813	0.000160763	3.00493e-05	923
Q92896-2	Q92896	GLG1	Isoform 2 of Golgi apparatus protein 1	5.01993e+07	2.00223e+07	3.51108e+07	0.000146437	0.000174203	0.00016032	1.38828e-05	924
Q9UBQ5	Q9UBQ5	EIF3K	Eukaryotic translation initiation factor 3 subunit K	5.65972e+07	1.78107e+07	3.72039e+07	0.000165101	0.000154961	0.000160031	5.06975e-06	925
Q6P5R6	Q6P5R6	RPL22L1	60S ribosomal protein L22-like 1	5.94024e+07	1.68117e+07	3.81071e+07	0.000173284	0.000146269	0.000159777	1.35073e-05	926
Q16822	Q16822	PCK2	Phosphoenolpyruvate carboxykinase [GTP], mitochondrial	3.94427e+07	2.34347e+07	3.14387e+07	0.000115059	0.000203892	0.000159476	4.44166e-05	927
P28070	P28070	PSMB4	Proteasome subunit beta type-4	6.4345e+07	1.50205e+07	3.96828e+07	0.000187702	0.000130685	0.000159193	2.85086e-05	928
P54920	P54920	NAPA	Alpha-soluble NSF attachment protein	5.64735e+07	1.76563e+07	3.70649e+07	0.00016474	0.000153618	0.000159179	5.56106e-06	929
Q9Y6C9	Q9Y6C9	MTCH2	Mitochondrial carrier homolog 2	5.12268e+07	1.93365e+07	3.52816e+07	0.000149435	0.000168236	0.000158835	9.40058e-06	930
Q16850	Q16850	CYP51A1	Lanosterol 14-alpha demethylase	4.28473e+07	2.20449e+07	3.24461e+07	0.000124991	0.000191801	0.000158396	3.34049e-05	931
Q9Y5B9	Q9Y5B9	SUPT16H	FACT complex subunit SPT16	5.01784e+07	1.95659e+07	3.48722e+07	0.000146376	0.000170232	0.000158304	1.1928e-05	932
Q9HD34	Q9HD34	LYRM4	LYR motif-containing protein 4	4.10874e+07	2.25997e+07	3.18435e+07	0.000119857	0.000196628	0.000158242	3.83854e-05	933
O75934	O75934	BCAS2	Pre-mRNA-splicing factor SPF27	3.98993e+07	2.29783e+07	3.14388e+07	0.000116391	0.000199922	0.000158156	4.17653e-05	934
P60059	P60059	SEC61G	Protein transport protein Sec61 subunit gamma		1.81056e+07	1.81056e+07		0.000157527	0.000157527	0.000157527	935
P55795	P55795	HNRNPH2	Heterogeneous nuclear ribonucleoprotein H2	5.75266e+07	1.69157e+07	3.72212e+07	0.000167812	0.000147174	0.000157493	1.0319e-05	936
Q14978-2	Q14978	NOLC1	Isoform Beta of Nucleolar and coiled-body phosphoprotein 1	5.46813e+07	1.77334e+07	3.62074e+07	0.000159512	0.000154289	0.0001569	2.61152e-06	937
Q13404-1	Q13404	UBE2V1	Isoform 1 of Ubiquitin-conjugating enzyme E2 variant 1	6.34108e+07	1.47363e+07	3.90735e+07	0.000184977	0.000128212	0.000156594	2.83823e-05	938
P08962	P08962	CD63	CD63 antigen	5.8321e+07	1.64115e+07	3.73662e+07	0.000170129	0.000142787	0.000156458	1.36711e-05	939
P61970	P61970	NUTF2	Nuclear transport factor 2	3.88871e+07	2.29206e+07	3.09038e+07	0.000113438	0.00019942	0.000156429	4.29907e-05	940
P30042	P30042	C21orf33	ES1 protein homolog, mitochondrial	6.84999e+07	1.29003e+07	4.07001e+07	0.000199822	0.000112238	0.00015603	4.37923e-05	941
P26440	P26440	IVD	Isovaleryl-CoA dehydrogenase, mitochondrial	6.15989e+07	1.51906e+07	3.83948e+07	0.000179691	0.000132165	0.000155928	2.3763e-05	942
P52209	P52209	PGD	6-phosphogluconate dehydrogenase, decarboxylating	6.1502e+07	1.51882e+07	3.83451e+07	0.000179409	0.000132144	0.000155776	2.36324e-05	943
Q7Z739	Q7Z739	YTHDF3	YTH domain-containing family protein 3	4.99147e+07	1.90635e+07	3.44891e+07	0.000145607	0.000165861	0.000155734	1.01271e-05	944
P48509	P48509	CD151	CD151 antigen	5.51884e+07	1.72502e+07	3.62193e+07	0.000160991	0.000150085	0.000155538	5.45326e-06	945
P16403	P16403	HIST1H1C	Histone H1.2	1.95752e+07	2.91763e+07	2.43758e+07	5.71033e-05	0.000253847	0.000155475	9.83719e-05	946
P53680	P53680	AP2S1	AP-2 complex subunit sigma	4.10468e+07	2.19221e+07	3.14844e+07	0.000119738	0.000190732	0.000155235	3.54968e-05	947
Q9HAN9	Q9HAN9	NMNAT1	Nicotinamide/nicotinic acid mononucleotide adenylyltransferase 1	6.72681e+07	1.31068e+07	4.01874e+07	0.000196229	0.000114035	0.000155132	4.10969e-05	948
P56134	P56134	ATP5J2	ATP synthase subunit f, mitochondrial	3.08656e+07	2.53019e+07	2.80837e+07	9.00386e-05	0.000220138	0.000155088	6.50496e-05	949
Q9UI09	Q9UI09	NDUFA12	NADH dehydrogenase [ubiquinone] 1 alpha subcomplex subunit 12	5.19191e+07	1.80946e+07	3.50069e+07	0.000151454	0.000157431	0.000154443	2.98832e-06	950
P08240	P08240	SRPRA	Signal recognition particle receptor subunit alpha	4.31598e+07	2.07729e+07	3.19663e+07	0.000125902	0.000180733	0.000153318	2.74156e-05	951
Q9Y2X3	Q9Y2X3	NOP58	Nucleolar protein 58	6.18376e+07	1.44339e+07	3.81357e+07	0.000180387	0.000125581	0.000152984	2.7403e-05	952
Q9Y3A6	Q9Y3A6	TMED5	Transmembrane emp24 domain-containing protein 5	5.63846e+07	1.62366e+07	3.63106e+07	0.000164481	0.000141266	0.000152873	1.16073e-05	953
Q9UH65	Q9UH65	SWAP70	Switch-associated protein 70	1.24106e+07	3.09473e+07	2.16789e+07	3.62031e-05	0.000269256	0.000152729	0.000116526	954
Q6P587	Q6P587	FAHD1	Acylpyruvase FAHD1, mitochondrial	6.16493e+07	1.44186e+07	3.80339e+07	0.000179838	0.000125448	0.000152643	2.71951e-05	955
P49915	P49915	GMPS	GMP synthase [glutamine-hydrolyzing]	7.64851e+07	9.4423e+06	4.29637e+07	0.000223116	8.21522e-05	0.000152634	7.04819e-05	956
P04080	P04080	CSTB	Cystatin-B	5.28406e+07	1.73613e+07	3.51009e+07	0.000154142	0.000151051	0.000152597	1.54576e-06	957
P13473-3	P13473	LAMP2	Isoform LAMP-2C of Lysosome-associated membrane glycoprotein 2	5.99084e+07	1.49208e+07	3.74146e+07	0.00017476	0.000129818	0.000152289	2.24709e-05	958
P38606	P38606	ATP6V1A	V-type proton ATPase catalytic subunit A	5.37767e+07	1.69723e+07	3.53745e+07	0.000156873	0.000147667	0.00015227	4.60298e-06	959
Q86XR7-2	Q86XR7	TICAM2	Isoform 2 of TIR domain-containing adapter molecule 2	4.57743e+07	1.9652e+07	3.27132e+07	0.000133529	0.000170981	0.000152255	1.87262e-05	960
Q14197	Q14197	MRPL58	Peptidyl-tRNA hydrolase ICT1, mitochondrial	6.11363e+07	1.44837e+07	3.781e+07	0.000178342	0.000126014	0.000152178	2.61638e-05	961
P31153	P31153	MAT2A	S-adenosylmethionine synthase isoform type-2	6.88158e+07	1.19089e+07	4.03623e+07	0.000200744	0.000103612	0.000152178	4.85657e-05	962
Q14108	Q14108	SCARB2	Lysosome membrane protein 2	3.35733e+07	2.37119e+07	2.86426e+07	9.79374e-05	0.000206304	0.000152121	5.41834e-05	963
Q9BXS5-2	Q9BXS5	AP1M1	Isoform 2 of AP-1 complex subunit mu-1	4.25669e+07	2.06695e+07	3.16182e+07	0.000124173	0.000179834	0.000152003	2.78306e-05	964
Q8NHP8	Q8NHP8	PLBD2	Putative phospholipase B-like 2	3.95171e+07	2.16355e+07	3.05763e+07	0.000115276	0.000188238	0.000151757	3.64811e-05	965
Q9H488	Q9H488	POFUT1	GDP-fucose protein O-fucosyltransferase 1	4.21518e+07	2.0719e+07	3.14354e+07	0.000122962	0.000180265	0.000151613	2.86514e-05	966
O75369-8	O75369	FLNB	Isoform 8 of Filamin-B	4.19086e+07	2.0742e+07	3.13253e+07	0.000122252	0.000180465	0.000151358	2.91062e-05	967
O60925	O60925	PFDN1	Prefoldin subunit 1	6.45723e+07	1.30526e+07	3.88125e+07	0.000188365	0.000113564	0.000150964	3.74007e-05	968
P78406	P78406	RAE1	mRNA export factor	4.6956e+07	1.89169e+07	3.29365e+07	0.000136976	0.000164586	0.000150781	1.38047e-05	969
P68400	P68400	CSNK2A1	Casein kinase II subunit alpha	5.15182e+07	1.73256e+07	3.44219e+07	0.000150285	0.00015074	0.000150512	2.27816e-07	970
Q86VP6	Q86VP6	CAND1	Cullin-associated NEDD8-dissociated protein 1	5.62549e+07	1.55835e+07	3.59192e+07	0.000164102	0.000135584	0.000149843	1.42593e-05	971
Q16563	Q16563	SYPL1	Synaptophysin-like protein 1	3.54325e+07	2.25574e+07	2.8995e+07	0.000103361	0.00019626	0.00014981	4.64493e-05	972
Q8NCA5	Q8NCA5	FAM98A	Protein FAM98A	3.46507e+07	2.27208e+07	2.86857e+07	0.00010108	0.000197681	0.00014938	4.83002e-05	973
Q9NYL4	Q9NYL4	FKBP11	Peptidyl-prolyl cis-trans isomerase FKBP11	2.4329e+07	2.61793e+07	2.52542e+07	7.09706e-05	0.000227772	0.000149371	7.84006e-05	974
P13746-2	P13746	HLA-A	Isoform 2 of HLA class I histocompatibility antigen, A-11 alpha chain	2.13224e+07	2.7089e+07	2.42057e+07	6.21999e-05	0.000235686	0.000148943	8.67431e-05	975
Q9NPA0	Q9NPA0	EMC7	ER membrane protein complex subunit 7	4.64593e+07	1.86465e+07	3.25529e+07	0.000135527	0.000162233	0.00014888	1.33528e-05	976
O95202	O95202	LETM1	LETM1 and EF-hand domain-containing protein 1, mitochondrial	5.58853e+07	1.54433e+07	3.56643e+07	0.000163024	0.000134364	0.000148694	1.43302e-05	977
Q14498	Q14498	RBM39	RNA-binding protein 39	4.65329e+07	1.855e+07	3.25415e+07	0.000135742	0.000161394	0.000148568	1.28259e-05	978
Q9BQ61	Q9BQ61	C19orf43	Uncharacterized protein C19orf43	7.61227e+07	8.59651e+06	4.23596e+07	0.000222059	7.47934e-05	0.000148426	7.36328e-05	979
Q14257-2	Q14257	RCN2	Isoform 2 of Reticulocalbin-2	3.64386e+07	2.18895e+07	2.91641e+07	0.000106296	0.000190449	0.000148372	4.20766e-05	980
P40121	P40121	CAPG	Macrophage-capping protein	4.28416e+07	1.9731e+07	3.12863e+07	0.000124974	0.000171669	0.000148321	2.33473e-05	981
O43396	O43396	TXNL1	Thioredoxin-like protein 1	6.2835e+07	1.28956e+07	3.78653e+07	0.000183297	0.000112197	0.000147747	3.555e-05	982
P07814	P07814	EPRS	Bifunctional glutamate/proline--tRNA ligase	5.72229e+07	1.47762e+07	3.59995e+07	0.000166926	0.00012856	0.000147743	1.91831e-05	983
Q9Y282-3	Q9Y282	ERGIC3	Isoform 3 of Endoplasmic reticulum-Golgi intermediate compartment protein 3	7.23838e+07	9.68166e+06	4.10327e+07	0.000211152	8.42347e-05	0.000147693	6.34587e-05	984
Q9NX24	Q9NX24	NHP2	H/ACA ribonucleoprotein complex subunit 2	5.03191e+07	1.70515e+07	3.36853e+07	0.000146787	0.000148356	0.000147571	7.84647e-07	985
Q12931	Q12931	TRAP1	Heat shock protein 75 kDa, mitochondrial	4.29494e+07	1.93574e+07	3.11534e+07	0.000125288	0.000168418	0.000146853	2.15645e-05	986
Q9Y2S6	Q9Y2S6	TMA7	Translation machinery-associated protein 7	2.94803e+07	2.38383e+07	2.66593e+07	8.59976e-05	0.000207404	0.000146701	6.07031e-05	987
P51665	P51665	PSMD7	26S proteasome non-ATPase regulatory subunit 7	3.41815e+07	2.22148e+07	2.81982e+07	9.97115e-05	0.000193279	0.000146495	4.67837e-05	988
P43897	P43897	TSFM	Elongation factor Ts, mitochondrial	3.97827e+07	2.03167e+07	3.00497e+07	0.000116051	0.000176764	0.000146408	3.03566e-05	989
O60884	O60884	DNAJA2	DnaJ homolog subfamily A member 2	5.16366e+07	1.62696e+07	3.39531e+07	0.00015063	0.000141553	0.000146091	4.53857e-06	990
O15355	O15355	PPM1G	Protein phosphatase 1G	6.40037e+07	1.20617e+07	3.80327e+07	0.000186706	0.000104942	0.000145824	4.08821e-05	991
P09486	P09486	SPARC	SPARC	1.3763e+07	2.88981e+07	2.13306e+07	4.01482e-05	0.000251427	0.000145787	0.000105639	992
O43175	O43175	PHGDH	D-3-phosphoglycerate dehydrogenase	3.40482e+07	2.20258e+07	2.8037e+07	9.93228e-05	0.000191634	0.000145478	4.61556e-05	993
P78344	P78344	EIF4G2	Eukaryotic translation initiation factor 4 gamma 2	4.49517e+07	1.83495e+07	3.16506e+07	0.00013113	0.000159649	0.000145389	1.42598e-05	994
O43491	O43491	EPB41L2	Band 4.1-like protein 2	2.19263e+07	2.60507e+07	2.39885e+07	6.39616e-05	0.000226653	0.000145307	8.13456e-05	995
P56556	P56556	NDUFA6	NADH dehydrogenase [ubiquinone] 1 alpha subcomplex subunit 6	6.00968e+07	1.32164e+07	3.66566e+07	0.00017531	0.000114989	0.000145149	3.01605e-05	996
Q16555	Q16555	DPYSL2	Dihydropyrimidinase-related protein 2	3.20902e+07	2.2588e+07	2.73391e+07	9.36109e-05	0.000196526	0.000145068	5.14574e-05	997
Q9NYL9	Q9NYL9	TMOD3	Tropomodulin-3	4.67795e+07	1.76404e+07	3.221e+07	0.000136461	0.000153479	0.00014497	8.50891e-06	998
P53618	P53618	COPB1	Coatomer subunit beta	4.01505e+07	1.98413e+07	2.99959e+07	0.000117124	0.000172628	0.000144876	2.77523e-05	999
O75380	O75380	NDUFS6	NADH dehydrogenase [ubiquinone] iron-sulfur protein 6, mitochondrial	6.31005e+07	1.21297e+07	3.76151e+07	0.000184072	0.000105533	0.000144803	3.92691e-05	1000
Q9Y4Z0	Q9Y4Z0	LSM4	U6 snRNA-associated Sm-like protein LSm4	5.01735e+07	1.64603e+07	3.33169e+07	0.000146362	0.000143212	0.000144787	1.57517e-06	1001
Q9NX62	Q9NX62	IMPAD1	Inositol monophosphatase 3	4.68223e+07	1.74484e+07	3.21354e+07	0.000136586	0.000151809	0.000144198	7.61128e-06	1002
Q8TDB4	Q8TDB4	MGARP	Protein MGARP	4.93559e+07		4.93559e+07	0.000143977		0.000143977		1003
Q13418	Q13418	ILK	Integrin-linked protein kinase	2.84814e+07	2.35453e+07	2.60134e+07	8.30836e-05	0.000204855	0.000143969	6.08857e-05	1004
O94776	O94776	MTA2	Metastasis-associated protein MTA2	4.66959e+07	1.74111e+07	3.20535e+07	0.000136218	0.000151484	0.000143851	7.63331e-06	1005
Q15459	Q15459	SF3A1	Splicing factor 3A subunit 1	4.7186e+07	1.72303e+07	3.22081e+07	0.000137647	0.000149911	0.000143779	6.13198e-06	1006
Q13227	Q13227	GPS2	G protein pathway suppressor 2	3.71302e+06	3.1774e+07	1.77435e+07	1.08313e-05	0.000276448	0.00014364	0.000132808	1007
Q05519	Q05519	SRSF11	Serine/arginine-rich splicing factor 11	5.04011e+07	1.61102e+07	3.32556e+07	0.000147026	0.000140166	0.000143596	3.43021e-06	1008
O00469-2	O00469	PLOD2	Isoform 2 of Procollagen-lysine,2-oxoglutarate 5-dioxygenase 2	5.03019e+07	1.61328e+07	3.32173e+07	0.000146737	0.000140362	0.000143549	3.18713e-06	1009
P49821	P49821	NDUFV1	NADH dehydrogenase [ubiquinone] flavoprotein 1, mitochondrial	4.10046e+07	1.92467e+07	3.01257e+07	0.000119615	0.000167455	0.000143535	2.39198e-05	1010
P27348	P27348	YWHAQ	14-3-3 protein theta	5.59784e+07	1.41766e+07	3.50775e+07	0.000163296	0.000123343	0.000143319	1.99764e-05	1011
Q9HD45	Q9HD45	TM9SF3	Transmembrane 9 superfamily member 3	4.63848e+07	1.73713e+07	3.18781e+07	0.00013531	0.000151138	0.000143224	7.91421e-06	1012
Q15121-2	Q15121	PEA15	Isoform 2 of Astrocytic phosphoprotein PEA-15	7.63669e+07	7.26891e+06	4.18179e+07	0.000222771	6.32428e-05	0.000143007	7.97643e-05	1013
Q9BSJ8-2	Q9BSJ8	ESYT1	Isoform 2 of Extended synaptotagmin-1	3.54788e+07	2.08965e+07	2.81877e+07	0.000103496	0.000181809	0.000142653	3.91566e-05	1014
P61201-2	P61201	COPS2	Isoform 2 of COP9 signalosome complex subunit 2	7.01918e+07	9.24695e+06	3.97194e+07	0.000204758	8.04526e-05	0.000142605	6.21526e-05	1015
O75323	O75323	GBAS	Protein NipSnap homolog 2	3.99388e+07	1.93089e+07	2.96238e+07	0.000116506	0.000167996	0.000142251	2.57447e-05	1016
P43304	P43304	GPD2	Glycerol-3-phosphate dehydrogenase, mitochondrial	5.2051e+07	1.52059e+07	3.36284e+07	0.000151839	0.000132298	0.000142069	9.77023e-06	1017
P41250	P41250	GARS	Glycine--tRNA ligase	3.94628e+07	1.94193e+07	2.9441e+07	0.000115118	0.000168957	0.000142037	2.69195e-05	1018
P49321	P49321	NASP	Nuclear autoantigenic sperm protein	5.94265e+07	1.27231e+07	3.60748e+07	0.000173354	0.000110696	0.000142025	3.13289e-05	1019
Q9NSD9	Q9NSD9	FARSB	Phenylalanine--tRNA ligase beta subunit	5.20911e+07	1.51554e+07	3.36233e+07	0.000151956	0.000131859	0.000141907	1.00486e-05	1020
P16278	P16278	GLB1	Beta-galactosidase	3.20201e+07	2.18345e+07	2.69273e+07	9.34063e-05	0.000189969	0.000141688	4.82816e-05	1021
O95167	O95167	NDUFA3	NADH dehydrogenase [ubiquinone] 1 alpha subcomplex subunit 3	5.89411e+07	1.27366e+07	3.58388e+07	0.000171938	0.000110814	0.000141376	3.05623e-05	1022
Q15637-5	Q15637	SF1	Isoform 5 of Splicing factor 1	5.90054e+07	1.26933e+07	3.58494e+07	0.000172126	0.000110438	0.000141282	3.08441e-05	1023
Q969V3	Q969V3	NCLN	Nicalin	4.76963e+07	1.64832e+07	3.20897e+07	0.000139136	0.000143411	0.000141273	2.13755e-06	1024
Q12841	Q12841	FSTL1	Follistatin-related protein 1	2.38133e+07	2.43976e+07	2.41054e+07	6.94661e-05	0.00021227	0.000140868	7.1402e-05	1025
Q14677-3	Q14677	CLINT1	Isoform 3 of Clathrin interactor 1	6.04818e+07	1.20921e+07	3.6287e+07	0.000176433	0.000105207	0.00014082	3.56128e-05	1026
Q9Y333	Q9Y333	LSM2	U6 snRNA-associated Sm-like protein LSm2	5.98946e+07	1.22002e+07	3.60474e+07	0.00017472	0.000106147	0.000140433	3.42863e-05	1027
Q86Y82	Q86Y82	STX12	Syntaxin-12	4.26789e+07	1.79461e+07	3.03125e+07	0.000124499	0.000156139	0.000140319	1.58201e-05	1028
O75400	O75400	PRPF40A	Pre-mRNA-processing factor 40 homolog A	5.56171e+07	1.35866e+07	3.46019e+07	0.000162242	0.00011821	0.000140226	2.20161e-05	1029
P46977	P46977	STT3A	Dolichyl-diphosphooligosaccharide--protein glycosyltransferase subunit STT3A	2.71584e+07	2.30619e+07	2.51102e+07	7.92244e-05	0.000200649	0.000139937	6.07122e-05	1030
Q15369	Q15369	TCEB1	Transcription elongation factor B polypeptide 1	4.6552e+07	1.64464e+07	3.14992e+07	0.000135798	0.000143091	0.000139445	3.64689e-06	1031
O94874	O94874	UFL1	E3 UFM1-protein ligase 1	3.78388e+07	1.91904e+07	2.85146e+07	0.00011038	0.000166965	0.000138672	2.82922e-05	1032
Q9BR76	Q9BR76	CORO1B	Coronin-1B	2.96664e+07	2.18913e+07	2.57788e+07	8.65403e-05	0.000190464	0.000138502	5.19619e-05	1033
Q9NVA2-2	Q9NVA2	40787	Isoform 2 of Septin-11	2.75969e+07	2.25822e+07	2.50895e+07	8.05033e-05	0.000196475	0.000138489	5.79861e-05	1034
P11233	P11233	RALA	Ras-related protein Ral-A	5.37076e+07	1.38229e+07	3.37653e+07	0.000156671	0.000120266	0.000138468	1.82029e-05	1035
Q9UKD2	Q9UKD2	MRTO4	mRNA turnover protein 4 homolog	5.55723e+07	1.31568e+07	3.43645e+07	0.000162111	0.00011447	0.00013829	2.38204e-05	1036
Q9Y230	Q9Y230	RUVBL2	RuvB-like 2	4.23142e+07	1.75447e+07	2.99294e+07	0.000123435	0.000152647	0.000138041	1.46056e-05	1037
Q96RP9-2	Q96RP9	GFM1	Isoform 2 of Elongation factor G, mitochondrial	5.78284e+07	1.2307e+07	3.50677e+07	0.000168692	0.000107076	0.000137884	3.08081e-05	1038
P30519	P30519	HMOX2	Heme oxygenase 2	6.06673e+07	1.12908e+07	3.5979e+07	0.000176974	9.82349e-05	0.000137604	3.93694e-05	1039
Q9Y266	Q9Y266	NUDC	Nuclear migration protein nudC	5.42695e+07	1.32558e+07	3.37626e+07	0.00015831	0.000115331	0.000136821	2.14896e-05	1040
Q8WUN7	Q8WUN7	UBTD2	Ubiquitin domain-containing protein 2	9.14813e+07	777682	4.61295e+07	0.000266862	6.76618e-06	0.000136814	0.000130048	1041
Q15165-1	Q15165	PON2	Isoform 1 of Serum paraoxonase/arylesterase 2	5.60911e+07	1.26171e+07	3.43541e+07	0.000163624	0.000109775	0.0001367	2.6925e-05	1042
Q96I24	Q96I24	FUBP3	Far upstream element-binding protein 3	4.01346e+07	1.79527e+07	2.90436e+07	0.000117077	0.000156197	0.000136637	1.95596e-05	1043
P15559	P15559	NQO1	NAD(P)H dehydrogenase [quinone] 1	4.23772e+07	1.71838e+07	2.97805e+07	0.000123619	0.000149507	0.000136563	1.29439e-05	1044
Q9UBT2	Q9UBT2	UBA2	SUMO-activating enzyme subunit 2	6.36494e+07	9.89702e+06	3.67732e+07	0.000185673	8.61085e-05	0.000135891	4.97821e-05	1045
P46087-4	P46087	NOP2	Isoform 4 of Probable 28S rRNA (cytosine(4447)-C(5))-methyltransferase	4.93444e+07	1.45926e+07	3.19685e+07	0.000143944	0.000126962	0.000135453	8.49079e-06	1046
P62875	P62875	POLR2L	DNA-directed RNA polymerases I, II, and III subunit RPABC5	5.43633e+07	1.29015e+07	3.36324e+07	0.000158584	0.000112248	0.000135416	2.31678e-05	1047
Q86UY8	Q86UY8	NT5DC3	5'-nucleotidase domain-containing protein 3	1.12927e+07	2.73397e+07	1.93162e+07	3.29422e-05	0.000237868	0.000135405	0.000102463	1048
P19388	P19388	POLR2E	DNA-directed RNA polymerases I, II, and III subunit RPABC1	2.83182e+07	2.16279e+07	2.4973e+07	8.26074e-05	0.000188172	0.00013539	5.27823e-05	1049
O43920	O43920	NDUFS5	NADH dehydrogenase [ubiquinone] iron-sulfur protein 5	5.08684e+07	1.40492e+07	3.24588e+07	0.000148389	0.000122234	0.000135312	1.30775e-05	1050
Q15428	Q15428	SF3A2	Splicing factor 3A subunit 2	4.50696e+07	1.58992e+07	3.04844e+07	0.000131473	0.00013833	0.000134902	3.42822e-06	1051
P58546	P58546	MTPN	Myotrophin	7.04149e+07	7.36268e+06	3.88888e+07	0.000205409	6.40586e-05	0.000134734	7.0675e-05	1052
O75937	O75937	DNAJC8	DnaJ homolog subfamily C member 8	5.44353e+07	1.26921e+07	3.35637e+07	0.000158794	0.000110427	0.00013461	2.41838e-05	1053
Q9Y2D5-6	Q9Y2D5	AKAP2	Isoform 4 of A-kinase anchor protein 2	4.88128e+07	1.45567e+07	3.16848e+07	0.000142393	0.00012665	0.000134521	7.87129e-06	1054
Q9GZR7	Q9GZR7	DDX24	ATP-dependent RNA helicase DDX24	4.06668e+07	1.72593e+07	2.89631e+07	0.00011863	0.000150164	0.000134397	1.5767e-05	1055
P35221-2	P35221	CTNNA1	Isoform 2 of Catenin alpha-1	3.71389e+07	1.84346e+07	2.77867e+07	0.000108338	0.000160389	0.000134364	2.60255e-05	1056
P51116	P51116	FXR2	Fragile X mental retardation syndrome-related protein 2	5.20325e+07	1.34223e+07	3.27274e+07	0.000151785	0.00011678	0.000134283	1.75023e-05	1057
P11182	P11182	DBT	Lipoamide acyltransferase component of branched-chain alpha-keto acid dehydrogenase complex, mitochondrial	1.14628e+07	2.6984e+07	1.92234e+07	3.34383e-05	0.000234773	0.000134106	0.000100667	1058
P55809	P55809	OXCT1	Succinyl-CoA:3-ketoacid coenzyme A transferase 1, mitochondrial	4.23582e+07	1.66243e+07	2.94912e+07	0.000123564	0.000144638	0.000134101	1.05373e-05	1059
P61081	P61081	UBE2M	NEDD8-conjugating enzyme Ubc12	5.83593e+07	1.11952e+07	3.47773e+07	0.000170241	9.74029e-05	0.000133822	3.64191e-05	1060
Q9Y305-4	Q9Y305	ACOT9	Isoform 4 of Acyl-coenzyme A thioesterase 9, mitochondrial	4.28575e+07	1.63799e+07	2.96187e+07	0.00012502	0.000142513	0.000133766	8.74613e-06	1061
Q9UL25	Q9UL25	RAB21	Ras-related protein Rab-21	5.69186e+07	1.16359e+07	3.42773e+07	0.000166038	0.000101238	0.000133638	3.24002e-05	1062
O15260	O15260	SURF4	Surfeit locus protein 4	4.35897e+07	1.6083e+07	2.98364e+07	0.000127156	0.00013993	0.000133543	6.38662e-06	1063
Q9NP81	Q9NP81	SARS2	Serine--tRNA ligase, mitochondrial	8.89591e+07	864697	4.49119e+07	0.000259504	7.52325e-06	0.000133514	0.00012599	1064
P98160	P98160	HSPG2	Basement membrane-specific heparan sulfate proteoglycan core protein	1.31341e+07	2.62662e+07	1.97002e+07	3.83139e-05	0.000228528	0.000133421	9.5107e-05	1065
Q8IV08	Q8IV08	PLD3	Phospholipase D3	1.96807e+07	2.4027e+07	2.18539e+07	5.7411e-05	0.000209046	0.000133228	7.58174e-05	1066
P13995	P13995	MTHFD2	Bifunctional methylenetetrahydrofolate dehydrogenase/cyclohydrolase, mitochondrial	4.60655e+07	1.51779e+07	3.06217e+07	0.000134379	0.000132055	0.000133217	1.16189e-06	1067
O00116	O00116	AGPS	Alkyldihydroxyacetonephosphate synthase, peroxisomal	4.22274e+07	1.64383e+07	2.93329e+07	0.000123182	0.00014302	0.000133101	9.91885e-06	1068
O75340	O75340	PDCD6	Programmed cell death protein 6	4.69492e+07	1.48324e+07	3.08908e+07	0.000136956	0.000129048	0.000133002	3.95413e-06	1069
P35914	P35914	HMGCL	Hydroxymethylglutaryl-CoA lyase, mitochondrial	3.81752e+07	1.7774e+07	2.79746e+07	0.000111361	0.000154642	0.000133002	2.16401e-05	1070
Q02809-2	Q02809	PLOD1	Isoform 2 of Procollagen-lysine,2-oxoglutarate 5-dioxygenase 1	4.02727e+07	1.7029e+07	2.86508e+07	0.00011748	0.00014816	0.00013282	1.534e-05	1071
O14653-2	O14653	GOSR2	Isoform B of Golgi SNAP receptor complex member 2	6.25455e+07	9.49946e+06	3.60225e+07	0.000182453	8.26495e-05	0.000132551	4.99015e-05	1072
Q99848	Q99848	EBNA1BP2	Probable rRNA-processing protein EBP2	5.41214e+07	1.23005e+07	3.3211e+07	0.000157879	0.00010702	0.000132449	2.54293e-05	1073
Q92599	Q92599	39692	Septin-8	4.11679e+07	1.66254e+07	2.88967e+07	0.000120092	0.000144648	0.00013237	1.22783e-05	1074
P50552	P50552	VASP	Vasodilator-stimulated phosphoprotein	3.2033e+07	1.9682e+07	2.58575e+07	9.34441e-05	0.000171242	0.000132343	3.8899e-05	1075
Q9UBM7	Q9UBM7	DHCR7	7-dehydrocholesterol reductase	6.53449e+07	8.50762e+06	3.69263e+07	0.000190619	7.40201e-05	0.000132319	5.82994e-05	1076
P52292	P52292	KPNA2	Importin subunit alpha-1	4.07705e+07	1.67046e+07	2.87375e+07	0.000118932	0.000145337	0.000132135	1.32024e-05	1077
P54136	P54136	RARS	Arginine--tRNA ligase, cytoplasmic	5.35869e+07	1.23952e+07	3.29911e+07	0.000156319	0.000107844	0.000132082	2.42377e-05	1078
P13489	P13489	RNH1	Ribonuclease inhibitor	5.04165e+07	1.3374e+07	3.18953e+07	0.000147071	0.00011636	0.000131715	1.53555e-05	1079
Q13155	Q13155	AIMP2	Aminoacyl tRNA synthase complex-interacting multifunctional protein 2	4.16871e+07	1.62926e+07	2.89899e+07	0.000121606	0.000141753	0.00013168	1.00733e-05	1080
Q96QR8	Q96QR8	PURB	Transcriptional activator protein Pur-beta	3.12895e+07	1.97436e+07	2.55166e+07	9.12753e-05	0.000171778	0.000131527	4.02515e-05	1081
Q5JTV8-3	Q5JTV8	TOR1AIP1	Isoform 3 of Torsin-1A-interacting protein 1	5.99795e+07	1.01048e+07	3.50421e+07	0.000174967	8.79164e-05	0.000131442	4.35254e-05	1082
Q8WWM7-3	Q8WWM7	ATXN2L	Isoform 3 of Ataxin-2-like protein	5.08803e+07	1.31072e+07	3.19937e+07	0.000148424	0.000114038	0.000131231	1.71927e-05	1083
Q8TED1	Q8TED1	GPX8	Probable glutathione peroxidase 8	4.88794e+07	1.37582e+07	3.13188e+07	0.000142587	0.000119702	0.000131145	1.14422e-05	1084
A1L0T0	A1L0T0	ILVBL	Acetolactate synthase-like protein	3.10244e+07	1.96926e+07	2.53585e+07	9.0502e-05	0.000171335	0.000130918	4.04164e-05	1085
O75643	O75643	SNRNP200	U5 small nuclear ribonucleoprotein 200 kDa helicase	4.9942e+07	1.33378e+07	3.16399e+07	0.000145687	0.000116045	0.000130866	1.48211e-05	1086
O60763-2	O60763	USO1	Isoform 2 of General vesicular transport factor p115	3.58982e+07	1.80438e+07	2.6971e+07	0.000104719	0.000156989	0.000130854	2.61347e-05	1087
O15212	O15212	PFDN6	Prefoldin subunit 6	3.75524e+07	1.7478e+07	2.75152e+07	0.000109545	0.000152067	0.000130806	2.12608e-05	1088
Q8N1F7	Q8N1F7	NUP93	Nuclear pore complex protein Nup93	4.33192e+07	1.54649e+07	2.93921e+07	0.000126367	0.000134552	0.00013046	4.0923e-06	1089
Q7LBR1	Q7LBR1	CHMP1B	Charged multivesicular body protein 1b	5.26115e+07	1.23102e+07	3.24609e+07	0.000153474	0.000107104	0.000130289	2.31848e-05	1090
Q9BX68	Q9BX68	HINT2	Histidine triad nucleotide-binding protein 2, mitochondrial	3.24235e+07	1.90744e+07	2.57489e+07	9.45832e-05	0.000165955	0.000130269	3.56861e-05	1091
Q13561-2	Q13561	DCTN2	Isoform 2 of Dynactin subunit 2	4.41872e+07	1.49903e+07	2.95888e+07	0.000128899	0.000130423	0.000129661	7.61662e-07	1092
P49736	P49736	MCM2	DNA replication licensing factor MCM2	4.47897e+07	1.47818e+07	2.97858e+07	0.000130657	0.000128608	0.000129633	1.02428e-06	1093
Q06323-2	Q06323	PSME1	Isoform 2 of Proteasome activator complex subunit 1	3.94083e+07	1.65354e+07	2.79718e+07	0.000114959	0.000143865	0.000129412	1.44534e-05	1094
Q9Y6B6	Q9Y6B6	SAR1B	GTP-binding protein SAR1b	4.22183e+07	1.55725e+07	2.88954e+07	0.000123156	0.000135488	0.000129322	6.16594e-06	1095
Q9P2K5	Q9P2K5	MYEF2	Myelin expression factor 2	6.76142e+07	7.00588e+06	3.731e+07	0.000197239	6.09543e-05	0.000129096	6.81421e-05	1096
Q9H307	Q9H307	PNN	Pinin	3.93385e+07	1.64765e+07	2.79075e+07	0.000114755	0.000143353	0.000129054	1.42991e-05	1097
O95299	O95299	NDUFA10	NADH dehydrogenase [ubiquinone] 1 alpha subcomplex subunit 10, mitochondrial	3.1665e+07	1.89897e+07	2.53274e+07	9.23706e-05	0.000165219	0.000128795	3.64243e-05	1098
P16949	P16949	STMN1	Stathmin	3.59517e+07	1.7545e+07	2.67484e+07	0.000104875	0.000152649	0.000128762	2.38869e-05	1099
Q9HCN8	Q9HCN8	SDF2L1	Stromal cell-derived factor 2-like protein 1	5.66999e+07	1.05774e+07	3.36386e+07	0.0001654	9.2028e-05	0.000128714	3.66862e-05	1100
P07108-5	P07108	DBI	Isoform 5 of Acyl-CoA-binding protein	4.99207e+07	1.28406e+07	3.13806e+07	0.000145625	0.000111719	0.000128672	1.69528e-05	1101
Q12874	Q12874	SF3A3	Splicing factor 3A subunit 3	4.69394e+07	1.38101e+07	3.03747e+07	0.000136928	0.000120154	0.000128541	8.38697e-06	1102
Q15382	Q15382	RHEB	GTP-binding protein Rheb	3.80219e+07	1.67949e+07	2.74084e+07	0.000110914	0.000146123	0.000128519	1.76044e-05	1103
Q9NX14-2	Q9NX14	NDUFB11	Isoform 2 of NADH dehydrogenase [ubiquinone] 1 beta subcomplex subunit 11, mitochondrial	5.5222e+07	1.10064e+07	3.31142e+07	0.000161089	9.57609e-05	0.000128425	3.26641e-05	1104
O43402	O43402	EMC8	ER membrane protein complex subunit 8	2.58247e+07	2.08577e+07	2.33412e+07	7.53336e-05	0.000181471	0.000128402	5.30687e-05	1105
Q9BRK5	Q9BRK5	SDF4	45 kDa calcium-binding protein	4.49931e+07	1.43989e+07	2.9696e+07	0.00013125	0.000125277	0.000128263	2.98672e-06	1106
P56199	P56199	ITGA1	Integrin alpha-1	9.51558e+06	2.62916e+07	1.79036e+07	2.77581e-05	0.000228748	0.000128253	0.000100495	1107
P46060	P46060	RANGAP1	Ran GTPase-activating protein 1	4.39655e+07	1.46182e+07	2.92919e+07	0.000128253	0.000127185	0.000127719	5.33664e-07	1108
Q9NVI7-2	Q9NVI7	ATAD3A	Isoform 2 of ATPase family AAA domain-containing protein 3A	4.11394e+07	1.55428e+07	2.83411e+07	0.000120008	0.000135229	0.000127619	7.6104e-06	1109
Q9Y2W1	Q9Y2W1	THRAP3	Thyroid hormone receptor-associated protein 3	4.96665e+07	1.25978e+07	3.11321e+07	0.000144883	0.000109606	0.000127245	1.76384e-05	1110
Q6NUQ4	Q6NUQ4	TMEM214	Transmembrane protein 214	4.55257e+07	1.39435e+07	2.97346e+07	0.000132804	0.000121314	0.000127059	5.74479e-06	1111
P37198	P37198	NUP62	Nuclear pore glycoprotein p62	6.30809e+07	8.03811e+06	3.55595e+07	0.000184015	6.99351e-05	0.000126975	5.70397e-05	1112
P33992	P33992	MCM5	DNA replication licensing factor MCM5	4.24419e+07	1.49545e+07	2.86982e+07	0.000123808	0.000130111	0.000126959	3.15156e-06	1113
O94905	O94905	ERLIN2	Erlin-2	5.9198e+07	9.29814e+06	3.42481e+07	0.000172688	8.08979e-05	0.000126793	4.58949e-05	1114
Q9UJZ1	Q9UJZ1	STOML2	Stomatin-like protein 2, mitochondrial	5.3449e+07	1.1212e+07	3.23305e+07	0.000155917	9.7549e-05	0.000126733	2.91839e-05	1115
Q86UE4	Q86UE4	MTDH	Protein LYRIC	4.11313e+07	1.53295e+07	2.82304e+07	0.000119985	0.000133374	0.000126679	6.69447e-06	1116
Q99470	Q99470	SDF2	Stromal cell-derived factor 2	5.29593e+07	1.13421e+07	3.21507e+07	0.000154489	9.86814e-05	0.000126585	2.79036e-05	1117
Q9H3P7	Q9H3P7	ACBD3	Golgi resident protein GCP60	3.44904e+07	1.75152e+07	2.60028e+07	0.000100613	0.00015239	0.000126502	2.58888e-05	1118
Q08945	Q08945	SSRP1	FACT complex subunit SSRP1	4.15357e+07	1.50375e+07	2.82866e+07	0.000121165	0.000130833	0.000125999	4.83415e-06	1119
Q7Z7H5	Q7Z7H5	TMED4	Transmembrane emp24 domain-containing protein 4	4.56898e+07	1.36243e+07	2.96571e+07	0.000133283	0.000118537	0.00012591	7.37265e-06	1120
Q53H82	Q53H82	LACTB2	Endoribonuclease LACTB2	6.16024e+07	8.26114e+06	3.49318e+07	0.000179701	7.18756e-05	0.000125789	5.39129e-05	1121
Q8N163	Q8N163	CCAR2	Cell cycle and apoptosis regulator protein 2	3.08078e+07	1.85017e+07	2.46548e+07	8.98699e-05	0.000160973	0.000125422	3.55517e-05	1122
P24821	P24821	TNC	Tenascin	2.80842e+07	1.94005e+07	2.37424e+07	8.1925e-05	0.000168793	0.000125359	4.34341e-05	1123
P43490	P43490	NAMPT	Nicotinamide phosphoribosyltransferase	7.066e+07	5.10969e+06	3.78849e+07	0.000206124	4.44566e-05	0.00012529	8.08335e-05	1124
Q9NYF8	Q9NYF8	BCLAF1	Bcl-2-associated transcription factor 1	6.31717e+07	7.60191e+06	3.53868e+07	0.000184279	6.614e-05	0.00012521	5.90697e-05	1125
O94925	O94925	GLS	Glutaminase kidney isoform, mitochondrial	3.49035e+07	1.70673e+07	2.59854e+07	0.000101818	0.000148493	0.000125155	2.33379e-05	1126
Q7Z406-2	Q7Z406	MYH14	Isoform 2 of Myosin-14	2.69829e+07	1.97151e+07	2.3349e+07	7.87124e-05	0.00017153	0.000125121	4.64088e-05	1127
Q15008	Q15008	PSMD6	26S proteasome non-ATPase regulatory subunit 6	5.22283e+07	1.12451e+07	3.17367e+07	0.000152356	9.78371e-05	0.000125097	2.72595e-05	1128
P28799	P28799	GRN	Granulins	4.40967e+07	1.39588e+07	2.90278e+07	0.000128635	0.000121448	0.000125042	3.59359e-06	1129
Q8NFQ8	Q8NFQ8	TOR1AIP2	Torsin-1A-interacting protein 2	6.11861e+07	8.17799e+06	3.46821e+07	0.000178487	7.11522e-05	0.00012482	5.36675e-05	1130
Q93052	Q93052	LPP	Lipoma-preferred partner	9.93738e+06	2.536e+07	1.76487e+07	2.89885e-05	0.000220644	0.000124816	9.58276e-05	1131
P69891	P69891	HBG1	Hemoglobin subunit gamma-1	1.59943e+07	2.33186e+07	1.96564e+07	4.66573e-05	0.000202882	0.00012477	7.81123e-05	1132
Q9Y512	Q9Y512	SAMM50	Sorting and assembly machinery component 50 homolog	3.32005e+07	1.75448e+07	2.53726e+07	9.68497e-05	0.000152647	0.000124749	2.78988e-05	1133
O75131	O75131	CPNE3	Copine-3	4.29043e+07	1.42812e+07	2.85928e+07	0.000125157	0.000124253	0.000124705	4.51989e-07	1134
P16220	P16220	CREB1	Cyclic AMP-responsive element-binding protein 1	4.019e+07	1.51809e+07	2.76855e+07	0.000117239	0.00013208	0.00012466	7.42064e-06	1135
Q96M27-2	Q96M27	PRRC1	Isoform 2 of Protein PRRC1	4.93777e+07	1.20596e+07	3.07187e+07	0.000144041	0.000104924	0.000124482	1.95585e-05	1136
Q9Y2Q5-2	Q9Y2Q5	LAMTOR2	Isoform 2 of Ragulator complex protein LAMTOR2	2.88757e+07	1.89301e+07	2.39029e+07	8.42337e-05	0.0001647	0.000124467	4.02332e-05	1137
O00115	O00115	DNASE2	Deoxyribonuclease-2-alpha	4.34041e+07	1.40566e+07	2.87304e+07	0.000126615	0.000122299	0.000124457	2.15801e-06	1138
Q2TAY7	Q2TAY7	SMU1	WD40 repeat-containing protein SMU1	4.58186e+07	1.32257e+07	2.95221e+07	0.000133658	0.000115069	0.000124364	9.29463e-06	1139
P61421	P61421	ATP6V0D1	V-type proton ATPase subunit d 1	4.2627e+07	1.424e+07	2.84335e+07	0.000124348	0.000123895	0.000124121	2.26727e-07	1140
Q9H444	Q9H444	CHMP4B	Charged multivesicular body protein 4b	5.30568e+07	1.05526e+07	3.18047e+07	0.000154773	9.18125e-05	0.000123293	3.14803e-05	1141
Q9NR56	Q9NR56	MBNL1	Muscleblind-like protein 1	4.69569e+07	1.24842e+07	2.97205e+07	0.000136979	0.000108618	0.000122798	1.41804e-05	1142
Q9Y4K0	Q9Y4K0	LOXL2	Lysyl oxidase homolog 2	2.75413e+07	1.89865e+07	2.32639e+07	8.03412e-05	0.000165191	0.000122766	4.24249e-05	1143
P63218	P63218	GNG5	Guanine nucleotide-binding protein G(I)/G(S)/G(O) subunit gamma-5	7.40184e+07	3.36426e+06	3.86913e+07	0.00021592	2.92706e-05	0.000122595	9.33249e-05	1144
O14737	O14737	PDCD5	Programmed cell death protein 5	5.80979e+07	8.59628e+06	3.33471e+07	0.000169479	7.47914e-05	0.000122135	4.73436e-05	1145
P08579	P08579	SNRPB2	U2 small nuclear ribonucleoprotein B''	3.44465e+07	1.65071e+07	2.54768e+07	0.000100484	0.000143619	0.000122052	2.15673e-05	1146
O75521	O75521	ECI2	Enoyl-CoA delta isomerase 2, mitochondrial	4.57871e+07	1.26912e+07	2.92392e+07	0.000133566	0.000110419	0.000121993	1.15736e-05	1147
Q5JRX3-2	Q5JRX3	PITRM1	Isoform 2 of Presequence protease, mitochondrial	3.55746e+07	1.60456e+07	2.58101e+07	0.000103775	0.000139604	0.000121689	1.79142e-05	1148
Q92769	Q92769	HDAC2	Histone deacetylase 2	3.60723e+07	1.58763e+07	2.59743e+07	0.000105227	0.000138131	0.000121679	1.64518e-05	1149
P06756	P06756	ITGAV	Integrin alpha-V	2.65737e+07	1.90577e+07	2.28157e+07	7.75186e-05	0.000165811	0.000121665	4.4146e-05	1150
P52298	P52298	NCBP2	Nuclear cap-binding protein subunit 2	6.10807e+07	7.4854e+06	3.4283e+07	0.000178179	6.51263e-05	0.000121653	5.65266e-05	1151
P57088	P57088	TMEM33	Transmembrane protein 33	3.96022e+07	1.4619e+07	2.71106e+07	0.000115524	0.000127192	0.000121358	5.8339e-06	1152
Q15436	Q15436	SEC23A	Protein transport protein Sec23A	4.40659e+07	1.31195e+07	2.85927e+07	0.000128545	0.000114145	0.000121345	7.20009e-06	1153
P24844	P24844	MYL9	Myosin regulatory light polypeptide 9	2.60679e+07	1.91293e+07	2.25986e+07	7.6043e-05	0.000166433	0.000121238	4.5195e-05	1154
Q92575	Q92575	UBXN4	UBX domain-containing protein 4	3.50633e+07	1.6113e+07	2.55882e+07	0.000102284	0.000140191	0.000121237	1.89535e-05	1155
Q04917	Q04917	YWHAH	14-3-3 protein eta	3.71361e+07	1.53865e+07	2.62613e+07	0.00010833	0.00013387	0.0001211	1.27697e-05	1156
Q15181	Q15181	PPA1	Inorganic pyrophosphatase	5.70329e+07	8.6992e+06	3.2866e+07	0.000166372	7.56869e-05	0.000121029	4.53424e-05	1157
O00148	O00148	DDX39A	ATP-dependent RNA helicase DDX39A	3.87167e+07	1.46532e+07	2.6685e+07	0.000112941	0.00012749	0.000120215	7.27426e-06	1158
P10155	P10155	TROVE2	60 kDa SS-A/Ro ribonucleoprotein	5.07115e+07	1.06238e+07	3.06677e+07	0.000147932	9.24321e-05	0.000120182	2.77497e-05	1159
P17568	P17568	NDUFB7	NADH dehydrogenase [ubiquinone] 1 beta subcomplex subunit 7	4.98983e+07	1.07769e+07	3.03376e+07	0.000145559	9.37642e-05	0.000119662	2.58976e-05	1160
O00154	O00154	ACOT7	Cytosolic acyl coenzyme A thioester hydrolase	5.45522e+07	9.19141e+06	3.18718e+07	0.000159135	7.99693e-05	0.000119552	3.9583e-05	1161
Q9UNL2-2	Q9UNL2	SSR3	Isoform 2 of Translocon-associated protein subunit gamma	3.80834e+07	1.46758e+07	2.63796e+07	0.000111094	0.000127686	0.00011939	8.2959e-06	1162
O75695	O75695	RP2	Protein XRP2	1.31963e+07	2.30152e+07	1.81057e+07	3.84951e-05	0.000200242	0.000119369	8.08736e-05	1163
P42126	P42126	ECI1	Enoyl-CoA delta isomerase 1, mitochondrial	2.48562e+07	1.90115e+07	2.19338e+07	7.25083e-05	0.000165408	0.000118958	4.64499e-05	1164
Q9NRX2	Q9NRX2	MRPL17	39S ribosomal protein L17, mitochondrial	4.36575e+07	1.26869e+07	2.81722e+07	0.000127354	0.000110382	0.000118868	8.48606e-06	1165
Q13595	Q13595	TRA2A	Transformer-2 protein homolog alpha	5.14291e+07	1.00519e+07	3.07405e+07	0.000150025	8.74561e-05	0.00011874	3.12844e-05	1166
P54578	P54578	USP14	Ubiquitin carboxyl-terminal hydrolase 14	4.61825e+07	1.17696e+07	2.8976e+07	0.00013472	0.000102401	0.00011856	1.61595e-05	1167
O76094	O76094	SRP72	Signal recognition particle subunit SRP72	4.35547e+07	1.26059e+07	2.80803e+07	0.000127054	0.000109677	0.000118365	8.68875e-06	1168
P15170-3	P15170	GSPT1	Isoform 3 of Eukaryotic peptide chain release factor GTP-binding subunit ERF3A	4.57129e+07	1.18433e+07	2.87781e+07	0.00013335	0.000103042	0.000118196	1.51541e-05	1169
Q01844-5	Q01844	EWSR1	Isoform 5 of RNA-binding protein EWS	3.87728e+07	1.41483e+07	2.64605e+07	0.000113105	0.000123096	0.000118101	4.99586e-06	1170
P19404	P19404	NDUFV2	NADH dehydrogenase [ubiquinone] flavoprotein 2, mitochondrial	3.93998e+07	1.39322e+07	2.6666e+07	0.000114934	0.000121217	0.000118075	3.14129e-06	1171
Q15287	Q15287	RNPS1	RNA-binding protein with serine-rich domain 1	4.48198e+07	1.20495e+07	2.84347e+07	0.000130745	0.000104836	0.00011779	1.29542e-05	1172
P62714	P62714	PPP2CB	Serine/threonine-protein phosphatase 2A catalytic subunit beta isoform	4.53313e+07	1.18303e+07	2.85808e+07	0.000132237	0.000102929	0.000117583	1.46539e-05	1173
P20645	P20645	M6PR	Cation-dependent mannose-6-phosphate receptor	4.0611e+07	1.33915e+07	2.70012e+07	0.000118467	0.000116512	0.000117489	9.77742e-07	1174
P62072	P62072	TIMM10	Mitochondrial import inner membrane translocase subunit Tim10	4.76569e+07	1.10158e+07	2.93364e+07	0.000139021	9.58428e-05	0.000117432	2.1589e-05	1175
Q9NTJ5	Q9NTJ5	SACM1L	Phosphatidylinositide phosphatase SAC1	3.72844e+07	1.4472e+07	2.58782e+07	0.000108763	0.000125913	0.000117338	8.57514e-06	1176
Q7L5N1	Q7L5N1	COPS6	COP9 signalosome complex subunit 6	2.25856e+07	1.93922e+07	2.09889e+07	6.58848e-05	0.000168721	0.000117303	5.14182e-05	1177
Q7L0Y3	Q7L0Y3	TRMT10C	Mitochondrial ribonuclease P protein 1	4.88316e+07	1.0552e+07	2.96918e+07	0.000142448	9.18068e-05	0.000117127	2.53204e-05	1178
P35237	P35237	SERPINB6	Serpin B6	4.17339e+07	1.27995e+07	2.72667e+07	0.000121743	0.000111361	0.000116552	5.19069e-06	1179
Q8TCS8	Q8TCS8	PNPT1	Polyribonucleotide nucleotidyltransferase 1, mitochondrial	3.93274e+07	1.35924e+07	2.64599e+07	0.000114723	0.00011826	0.000116491	1.7688e-06	1180
P26378-3	P26378	ELAVL4	Isoform 3 of ELAV-like protein 4	4.22163e+07	1.26013e+07	2.74088e+07	0.00012315	0.000109637	0.000116393	6.75645e-06	1181
Q9BYC9	Q9BYC9	MRPL20	39S ribosomal protein L20, mitochondrial	6.48347e+07	4.999e+06	3.49169e+07	0.000189131	4.34936e-05	0.000116312	7.28185e-05	1182
Q9BPW8	Q9BPW8	NIPSNAP1	Protein NipSnap homolog 1	4.26513e+07	1.24073e+07	2.75293e+07	0.000124419	0.000107949	0.000116184	8.23475e-06	1183
Q9NWS8	Q9NWS8	RMND1	Required for meiotic nuclear division protein 1 homolog	5.5627e+06	2.47299e+07	1.51463e+07	1.6227e-05	0.000215161	0.000115694	9.94669e-05	1184
Q9NPE3	Q9NPE3	NOP10	H/ACA ribonucleoprotein complex subunit 3	4.82199e+07	1.0359e+07	2.92894e+07	0.000140663	9.01276e-05	0.000115395	2.52678e-05	1185
Q9P0M6	Q9P0M6	H2AFY2	Core histone macro-H2A.2	2.97141e+07	1.65551e+07	2.31346e+07	8.66796e-05	0.000144036	0.000115358	2.86784e-05	1186
P07093-3	P07093	SERPINE2	Isoform 3 of Glia-derived nexin	7.05856e+07	2.82053e+06	3.6703e+07	0.000205906	2.45398e-05	0.000115223	9.06833e-05	1187
P33993	P33993	MCM7	DNA replication licensing factor MCM7	4.81704e+07	1.03333e+07	2.92519e+07	0.000140519	8.99039e-05	0.000115211	2.53075e-05	1188
O95433	O95433	AHSA1	Activator of 90 kDa heat shock protein ATPase homolog 1	4.60208e+07	1.09711e+07	2.84959e+07	0.000134248	9.54537e-05	0.000114851	1.93971e-05	1189
P62633	P62633	CNBP	Cellular nucleic acid-binding protein	5.31534e+07	8.55521e+06	3.08543e+07	0.000155055	7.44341e-05	0.000114744	4.03104e-05	1190
Q5JWF2	Q5JWF2	GNAS	Guanine nucleotide-binding protein G(s) subunit alpha isoforms XLas	5.35129e+07	8.42974e+06	3.09713e+07	0.000156103	7.33425e-05	0.000114723	4.13805e-05	1191
P12270	P12270	TPR	Nucleoprotein TPR	4.02647e+07	1.28222e+07	2.65435e+07	0.000117457	0.000111559	0.000114508	2.94895e-06	1192
P00846	P00846	MT-ATP6	ATP synthase subunit a	5.32132e+07	8.37534e+06	3.07943e+07	0.000155229	7.28692e-05	0.000114049	4.11799e-05	1193
P12074	P12074	COX6A1	Cytochrome c oxidase subunit 6A1, mitochondrial	4.47233e+07	1.12173e+07	2.79703e+07	0.000130463	9.75957e-05	0.000114029	1.64337e-05	1194
Q16527	Q16527	CSRP2	Cysteine and glycine-rich protein 2	1.21138e+07	2.20659e+07	1.70899e+07	3.53374e-05	0.000191983	0.00011366	7.8323e-05	1195
Q9Y3S2	Q9Y3S2	ZNF330	Zinc finger protein 330	7.71676e+07	249190	3.87084e+07	0.000225107	2.16807e-06	0.000113638	0.00011147	1196
Q9NSE4	Q9NSE4	IARS2	Isoleucine--tRNA ligase, mitochondrial	4.11562e+07	1.23124e+07	2.67343e+07	0.000120057	0.000107124	0.00011359	6.46697e-06	1197
Q9Y3B7	Q9Y3B7	MRPL11	39S ribosomal protein L11, mitochondrial	3.14246e+07	1.54721e+07	2.34484e+07	9.16694e-05	0.000134614	0.000113142	2.14725e-05	1198
O14974	O14974	PPP1R12A	Protein phosphatase 1 regulatory subunit 12A	4.58077e+07	1.0643e+07	2.82253e+07	0.000133626	9.25986e-05	0.000113113	2.05139e-05	1199
Q15067-2	Q15067	ACOX1	Isoform 2 of Peroxisomal acyl-coenzyme A oxidase 1	3.46209e+07	1.43583e+07	2.44896e+07	0.000100993	0.000124924	0.000112959	1.19653e-05	1200
P20336	P20336	RAB3A	Ras-related protein Rab-3A	3.41415e+07	1.45182e+07	2.43298e+07	9.95947e-05	0.000126314	0.000112955	1.33598e-05	1201
Q99442	Q99442	SEC62	Translocation protein SEC62	4.55689e+07	1.0682e+07	2.81254e+07	0.00013293	9.29383e-05	0.000112934	1.99957e-05	1202
O75955	O75955	FLOT1	Flotillin-1	4.52175e+07	1.0692e+07	2.79548e+07	0.000131905	9.30254e-05	0.000112465	1.94397e-05	1203
Q14151	Q14151	SAFB2	Scaffold attachment factor B2	4.18595e+07	1.18044e+07	2.6832e+07	0.000122109	0.000102703	0.000112406	9.70291e-06	1204
Q9NWM8	Q9NWM8	FKBP14	Peptidyl-prolyl cis-trans isomerase FKBP14	5.22418e+07	8.30085e+06	3.02713e+07	0.000152396	7.2221e-05	0.000112308	4.00873e-05	1205
Q96HS1	Q96HS1	PGAM5	Serine/threonine-protein phosphatase PGAM5, mitochondrial	3.6385e+07	1.35545e+07	2.49697e+07	0.000106139	0.00011793	0.000112035	5.89546e-06	1206
O75533	O75533	SF3B1	Splicing factor 3B subunit 1	2.87989e+07	1.60944e+07	2.24467e+07	8.40098e-05	0.000140028	0.000112019	2.80093e-05	1207
Q13084	Q13084	MRPL28	39S ribosomal protein L28, mitochondrial	5.99317e+07	5.61738e+06	3.27745e+07	0.000174828	4.88737e-05	0.000111851	6.2977e-05	1208
O60565	O60565	GREM1	Gremlin-1	3.79208e+07	1.29861e+07	2.54534e+07	0.00011062	0.000112985	0.000111802	1.1825e-06	1209
P53701	P53701	HCCS	Cytochrome c-type heme lyase	5.03174e+07	8.80715e+06	2.95623e+07	0.000146782	7.66261e-05	0.000111704	3.50779e-05	1210
Q9BUJ2	Q9BUJ2	HNRNPUL1	Heterogeneous nuclear ribonucleoprotein U-like protein 1	4.99681e+07	8.86712e+06	2.94176e+07	0.000145763	7.71479e-05	0.000111455	3.43076e-05	1211
Q9NP97	Q9NP97	DYNLRB1	Dynein light chain roadblock-type 1	3.30387e+07	1.45356e+07	2.37871e+07	9.63778e-05	0.000126466	0.000111422	1.50441e-05	1212
P83916	P83916	CBX1	Chromobox protein homolog 1	3.07645e+07	1.52815e+07	2.3023e+07	8.97436e-05	0.000132955	0.000111349	2.16059e-05	1213
Q6YN16	Q6YN16	HSDL2	Hydroxysteroid dehydrogenase-like protein 2	4.53041e+07	1.03597e+07	2.78319e+07	0.000132157	9.01338e-05	0.000111146	2.10118e-05	1214
O96019	O96019	ACTL6A	Actin-like protein 6A	5.00501e+07	8.72605e+06	2.93881e+07	0.000146002	7.59205e-05	0.000110961	3.50408e-05	1215
Q9BVL2	Q9BVL2	NUP58	Nucleoporin p58/p45	4.0991e+07	1.17614e+07	2.63762e+07	0.000119576	0.000102329	0.000110952	8.6232e-06	1216
P42166	P42166	TMPO	Lamina-associated polypeptide 2, isoform alpha	3.52559e+07	1.36597e+07	2.44578e+07	0.000102846	0.000118845	0.000110845	7.99965e-06	1217
Q9Y2R5	Q9Y2R5	MRPS17	28S ribosomal protein S17, mitochondrial	4.19152e+07	1.14065e+07	2.66608e+07	0.000122271	9.92417e-05	0.000110757	1.15149e-05	1218
Q3SY69	Q3SY69	ALDH1L2	Mitochondrial 10-formyltetrahydrofolate dehydrogenase	2.2358e+07	1.79156e+07	2.01368e+07	6.5221e-05	0.000155874	0.000110548	4.53265e-05	1219
Q9H553	Q9H553	ALG2	Alpha-1,3/1,6-mannosyltransferase ALG2	2.00062e+07	1.86966e+07	1.93514e+07	5.83605e-05	0.000162668	0.000110514	5.21539e-05	1220
O75439	O75439	PMPCB	Mitochondrial-processing peptidase subunit beta	4.48239e+07	1.03742e+07	2.7599e+07	0.000130757	9.02599e-05	0.000110508	2.02483e-05	1221
P60033	P60033	CD81	CD81 antigen	7.78728e+06	2.27713e+07	1.52793e+07	2.27164e-05	0.00019812	0.000110418	8.77019e-05	1222
P25205-2	P25205	MCM3	Isoform 2 of DNA replication licensing factor MCM3	4.55829e+07	1.0045e+07	2.7814e+07	0.000132971	8.73961e-05	0.000110183	2.27873e-05	1223
P63098	P63098	PPP3R1	Calcineurin subunit B type 1	2.92199e+07	1.54967e+07	2.23583e+07	8.5238e-05	0.000134828	0.000110033	2.47952e-05	1224
Q9NS69	Q9NS69	TOMM22	Mitochondrial import receptor subunit TOM22 homolog	2.639e+07	1.6445e+07	2.14175e+07	7.69827e-05	0.000143079	0.000110031	3.30481e-05	1225
Q9UMR2	Q9UMR2	DDX19B	ATP-dependent RNA helicase DDX19B	6.03244e+07	5.05986e+06	3.26921e+07	0.000175973	4.4023e-05	0.000109998	6.59752e-05	1226
P60468	P60468	SEC61B	Protein transport protein Sec61 subunit beta	4.3746e+07	1.06163e+07	2.71812e+07	0.000127612	9.23663e-05	0.000109989	1.7623e-05	1227
Q08257	Q08257	CRYZ	Quinone oxidoreductase	4.3616e+07	1.05978e+07	2.71069e+07	0.000127233	9.22054e-05	0.000109719	1.75138e-05	1228
Q14195-2	Q14195	DPYSL3	Isoform LCRMP-4 of Dihydropyrimidinase-related protein 3	2.15084e+07	1.7981e+07	1.97447e+07	6.27425e-05	0.000156442	0.000109592	4.68499e-05	1229
Q7L014	Q7L014	DDX46	Probable ATP-dependent RNA helicase DDX46	3.52014e+07	1.33617e+07	2.42815e+07	0.000102687	0.000116252	0.000109469	6.78288e-06	1230
Q13637	Q13637	RAB32	Ras-related protein Rab-32	2.64977e+07	1.62633e+07	2.13805e+07	7.72969e-05	0.000141498	0.000109398	3.21007e-05	1231
P25685	P25685	DNAJB1	DnaJ homolog subfamily B member 1	4.42199e+07	1.01624e+07	2.71911e+07	0.000128995	8.84171e-05	0.000108706	2.02888e-05	1232
P07099	P07099	EPHX1	Epoxide hydrolase 1	2.70828e+07	1.59008e+07	2.14918e+07	7.90038e-05	0.000138344	0.000108674	2.96702e-05	1233
O95139	O95139	NDUFB6	NADH dehydrogenase [ubiquinone] 1 beta subcomplex subunit 6	2.67225e+07	1.60029e+07	2.13627e+07	7.79526e-05	0.000139233	0.000108593	3.064e-05	1234
P56537	P56537	EIF6	Eukaryotic translation initiation factor 6	4.36213e+07	1.02772e+07	2.69493e+07	0.000127248	8.94166e-05	0.000108332	1.89159e-05	1235
Q92900	Q92900	UPF1	Regulator of nonsense transcripts 1	3.25776e+07	1.3948e+07	2.32628e+07	9.50327e-05	0.000121354	0.000108193	1.31605e-05	1236
Q96HC4	Q96HC4	PDLIM5	PDZ and LIM domain protein 5	1.59381e+07	1.94235e+07	1.76808e+07	4.64932e-05	0.000168993	0.000107743	6.125e-05	1237
Q15046-2	Q15046	KARS	Isoform Mitochondrial of Lysine--tRNA ligase	4.43578e+07	9.89111e+06	2.71245e+07	0.000129397	8.6057e-05	0.000107727	2.167e-05	1238
Q9UGP8	Q9UGP8	SEC63	Translocation protein SEC63 homolog	4.52531e+07	9.44784e+06	2.73505e+07	0.000132009	8.22004e-05	0.000107105	2.49041e-05	1239
Q9UKV3	Q9UKV3	ACIN1	Apoptotic chromatin condensation inducer in the nucleus	3.9056e+07	1.15216e+07	2.52888e+07	0.000113931	0.000100243	0.000107087	6.84394e-06	1240
E9PRG8	E9PRG8	C11orf98	Uncharacterized protein C11orf98	4.1581e+07	1.06535e+07	2.61172e+07	0.000121297	9.26906e-05	0.000106994	1.4303e-05	1241
P33991	P33991	MCM4	DNA replication licensing factor MCM4	4.67521e+07	8.90818e+06	2.78301e+07	0.000136381	7.75051e-05	0.000106943	2.94382e-05	1242
Q9H9J2	Q9H9J2	MRPL44	39S ribosomal protein L44, mitochondrial	4.27401e+07	1.01983e+07	2.64692e+07	0.000124678	8.87297e-05	0.000106704	1.79742e-05	1243
Q9Y5X1	Q9Y5X1	SNX9	Sorting nexin-9	2.6342e+07	1.56854e+07	2.10137e+07	7.68429e-05	0.00013647	0.000106656	2.98135e-05	1244
Q9NY12	Q9NY12	GAR1	H/ACA ribonucleoprotein complex subunit 1	4.16966e+07	1.05334e+07	2.6115e+07	0.000121634	9.16449e-05	0.000106639	1.49945e-05	1245
Q99471	Q99471	PFDN5	Prefoldin subunit 5	3.99326e+07	1.10906e+07	2.55116e+07	0.000116488	9.64934e-05	0.000106491	9.99732e-06	1246
O95777	O95777	LSM8	U6 snRNA-associated Sm-like protein LSm8	4.8308e+07	8.24142e+06	2.82747e+07	0.00014092	7.1704e-05	0.000106312	3.4608e-05	1247
O43747-2	O43747	AP1G1	Isoform 2 of AP-1 complex subunit gamma-1	2.96092e+07	1.44789e+07	2.20441e+07	8.63737e-05	0.000125973	0.000106173	1.97998e-05	1248
P07384	P07384	CAPN1	Calpain-1 catalytic subunit	3.14904e+07	1.38341e+07	2.26622e+07	9.18611e-05	0.000120362	0.000106112	1.42507e-05	1249
P55209	P55209	NAP1L1	Nucleosome assembly protein 1-like 1	2.04693e+07	1.75036e+07	1.89864e+07	5.97114e-05	0.000152289	0.000106	4.62888e-05	1250
Q9ULC3	Q9ULC3	RAB23	Ras-related protein Rab-23	2.03058e+07	1.75396e+07	1.89227e+07	5.92346e-05	0.000152602	0.000105918	4.66839e-05	1251
Q15075	Q15075	EEA1	Early endosome antigen 1	3.31455e+07	1.32234e+07	2.31844e+07	9.66892e-05	0.00011505	0.000105869	9.18017e-06	1252
P82932	P82932	MRPS6	28S ribosomal protein S6, mitochondrial	4.10728e+07	1.05585e+07	2.58157e+07	0.000119814	9.1864e-05	0.000105839	1.3975e-05	1253
Q13428-4	Q13428	TCOF1	Isoform 4 of Treacle protein	2.67868e+07	1.53222e+07	2.10545e+07	7.81404e-05	0.00013331	0.000105725	2.75849e-05	1254
P41252	P41252	IARS	Isoleucine--tRNA ligase, cytoplasmic	3.98651e+07	1.09213e+07	2.53932e+07	0.000116291	9.50199e-05	0.000105656	1.06356e-05	1255
Q92843-2	Q92843	BCL2L2	Isoform 3 of Bcl-2-like protein 2	3.18287e+07	1.35912e+07	2.271e+07	9.28481e-05	0.00011825	0.000105549	1.27008e-05	1256
Q13724	Q13724	MOGS	Mannosyl-oligosaccharide glucosidase	3.43027e+07	1.2756e+07	2.35294e+07	0.000100065	0.000110983	0.000105524	5.45903e-06	1257
Q9NR28	Q9NR28	DIABLO	Diablo homolog, mitochondrial	3.0496e+07	1.40213e+07	2.22586e+07	8.89603e-05	0.000121992	0.000105476	1.65158e-05	1258
Q8TC12	Q8TC12	RDH11	Retinol dehydrogenase 11	3.99935e+07	1.07949e+07	2.53942e+07	0.000116666	9.39208e-05	0.000105293	1.13725e-05	1259
Q00059	Q00059	TFAM	Transcription factor A, mitochondrial	4.55175e+07	8.91242e+06	2.7215e+07	0.00013278	7.7542e-05	0.000105161	2.7619e-05	1260
Q15286	Q15286	RAB35	Ras-related protein Rab-35	3.93799e+07	1.09691e+07	2.51745e+07	0.000114876	9.54356e-05	0.000105156	9.72006e-06	1261
P39748	P39748	FEN1	Flap endonuclease 1	3.86866e+07	1.11973e+07	2.4942e+07	0.000112853	9.74217e-05	0.000105138	7.71581e-06	1262
P30085	P30085	CMPK1	UMP-CMP kinase	5.57018e+07	5.47841e+06	3.05901e+07	0.000162489	4.76646e-05	0.000105077	5.74121e-05	1263
Q96AJ9	Q96AJ9	VTI1A	Vesicle transport through interaction with t-SNAREs homolog 1A	5.44392e+07	5.89638e+06	3.01678e+07	0.000158806	5.13011e-05	0.000105053	5.37523e-05	1264
Q92734	Q92734	TFG	Protein TFG	3.15179e+07	1.3568e+07	2.25429e+07	9.19413e-05	0.000118048	0.000104995	1.30533e-05	1265
Q6P2Q9	Q6P2Q9	PRPF8	Pre-mRNA-processing-splicing factor 8	3.96498e+07	1.0824e+07	2.52369e+07	0.000115663	9.41733e-05	0.000104918	1.07449e-05	1266
P51948	P51948	MNAT1	CDK-activating kinase assembly factor MAT1	6.21347e+07	3.27496e+06	3.27049e+07	0.000181254	2.84936e-05	0.000104874	7.63804e-05	1267
Q9Y320	Q9Y320	TMX2	Thioredoxin-related transmembrane protein 2	4.12627e+07	1.02218e+07	2.57423e+07	0.000120368	8.89345e-05	0.000104651	1.57168e-05	1268
O15269	O15269	SPTLC1	Serine palmitoyltransferase 1	4.92248e+07	7.48553e+06	2.83552e+07	0.000143595	6.51274e-05	0.000104361	3.92336e-05	1269
O75381	O75381	PEX14	Peroxisomal membrane protein PEX14	4.06999e+07	1.0297e+07	2.54984e+07	0.000118726	8.95884e-05	0.000104157	1.4569e-05	1270
Q16718	Q16718	NDUFA5	NADH dehydrogenase [ubiquinone] 1 alpha subcomplex subunit 5	3.72697e+07	1.14083e+07	2.4339e+07	0.00010872	9.92577e-05	0.000103989	4.73123e-06	1271
Q9BWJ5	Q9BWJ5	SF3B5	Splicing factor 3B subunit 5	4.02952e+07	1.03476e+07	2.53214e+07	0.000117546	9.00286e-05	0.000103787	1.37586e-05	1272
O75352	O75352	MPDU1	Mannose-P-dolichol utilization defect 1 protein	7.00341e+06	2.13958e+07	1.41996e+07	2.04298e-05	0.000186153	0.000103291	8.28617e-05	1273
P23368	P23368	ME2	NAD-dependent malic enzyme, mitochondrial	3.76303e+07	1.10922e+07	2.43613e+07	0.000109772	9.65074e-05	0.00010314	6.63227e-06	1274
Q9UHB6	Q9UHB6	LIMA1	LIM domain and actin-binding protein 1	2.7214e+07	1.45638e+07	2.08889e+07	7.93864e-05	0.000126712	0.000103049	2.36627e-05	1275
Q92569	Q92569	PIK3R3	Phosphatidylinositol 3-kinase regulatory subunit gamma	3.79676e+07	1.09547e+07	2.44612e+07	0.000110756	9.5311e-05	0.000103033	7.72245e-06	1276
Q9H0U3	Q9H0U3	MAGT1	Magnesium transporter protein 1	2.35839e+07	1.57732e+07	1.96785e+07	6.8797e-05	0.000137234	0.000103015	3.42184e-05	1277
Q15424-3	Q15424	SAFB	Isoform 3 of Scaffold attachment factor B1	3.62896e+07	1.14934e+07	2.38915e+07	0.000105861	9.99973e-05	0.000102929	2.93187e-06	1278
Q14554	Q14554	PDIA5	Protein disulfide-isomerase A5	4.15154e+07	9.72741e+06	2.56214e+07	0.000121105	8.46327e-05	0.000102869	1.82363e-05	1279
O60488	O60488	ACSL4	Long-chain-fatty-acid--CoA ligase 4	4.19023e+07	9.54544e+06	2.57239e+07	0.000122234	8.30496e-05	0.000102642	1.95922e-05	1280
P61011	P61011	SRP54	Signal recognition particle 54 kDa protein	3.79399e+07	1.08618e+07	2.44009e+07	0.000110675	9.45026e-05	0.000102589	8.08635e-06	1281
P07942	P07942	LAMB1	Laminin subunit beta-1	3.18092e+07	1.29002e+07	2.23547e+07	9.27911e-05	0.000112238	0.000102514	9.72323e-06	1282
P28838	P28838	LAP3	Cytosol aminopeptidase	3.80429e+07	1.07885e+07	2.44157e+07	0.000110976	9.38645e-05	0.00010242	8.5555e-06	1283
P09001	P09001	MRPL3	39S ribosomal protein L3, mitochondrial	4.16538e+07	9.56814e+06	2.5611e+07	0.000121509	8.32471e-05	0.000102378	1.9131e-05	1284
Q96CS3	Q96CS3	FAF2	FAS-associated factor 2	3.23294e+07	1.26439e+07	2.24866e+07	9.43086e-05	0.000110007	0.000102158	7.84939e-06	1285
Q14254	Q14254	FLOT2	Flotillin-2	3.61692e+07	1.13387e+07	2.3754e+07	0.00010551	9.86518e-05	0.000102081	3.42905e-06	1286
Q9BZG1	Q9BZG1	RAB34	Ras-related protein Rab-34	3.43924e+07	1.19326e+07	2.31625e+07	0.000100327	0.000103819	0.000102073	1.74625e-06	1287
P01033	P01033	TIMP1	Metalloproteinase inhibitor 1	4.83262e+07	7.25973e+06	2.7793e+07	0.000140973	6.31628e-05	0.000102068	3.89052e-05	1288
Q0VDF9	Q0VDF9	HSPA14	Heat shock 70 kDa protein 14	6.57438e+06	2.1227e+07	1.39007e+07	1.91782e-05	0.000184684	0.000101931	8.2753e-05	1289
O14773	O14773	TPP1	Tripeptidyl-peptidase 1	4.05551e+07	9.81851e+06	2.51868e+07	0.000118304	8.54254e-05	0.000101865	1.64393e-05	1290
O60888-2	O60888	CUTA	Isoform A of Protein CutA	1.13127e+07	1.9513e+07	1.54128e+07	3.30003e-05	0.000169772	0.000101386	6.83856e-05	1291
Q3ZCQ8-2	Q3ZCQ8	TIMM50	Isoform 2 of Mitochondrial import inner membrane translocase subunit TIM50	4.37733e+07	8.59448e+06	2.61839e+07	0.000127692	7.47758e-05	0.000101234	2.6458e-05	1292
P68036	P68036	UBE2L3	Ubiquitin-conjugating enzyme E2 L3	5.0688e+07	6.25053e+06	2.84693e+07	0.000147863	5.43824e-05	0.000101123	4.67403e-05	1293
Q9BPZ3	Q9BPZ3	PAIP2	Polyadenylate-binding protein-interacting protein 2	3.79575e+07	1.05081e+07	2.42328e+07	0.000110727	9.14253e-05	0.000101076	9.65063e-06	1294
O14980	O14980	XPO1	Exportin-1	3.13215e+07	1.26702e+07	2.19958e+07	9.13684e-05	0.000110236	0.000100802	9.43388e-06	1295
Q07960	Q07960	ARHGAP1	Rho GTPase-activating protein 1	4.60279e+07	7.73648e+06	2.68822e+07	0.000134269	6.73109e-05	0.00010079	3.34789e-05	1296
Q9H2U2-2	Q9H2U2	PPA2	Isoform 2 of Inorganic pyrophosphatase 2, mitochondrial	4.22271e+07	9.00172e+06	2.56144e+07	0.000123182	7.83189e-05	0.00010075	2.24313e-05	1297
Q86SX6	Q86SX6	GLRX5	Glutaredoxin-related protein 5, mitochondrial	2.6834e+07	1.41574e+07	2.04957e+07	7.82779e-05	0.000123176	0.000100727	2.24488e-05	1298
Q15041	Q15041	ARL6IP1	ADP-ribosylation factor-like protein 6-interacting protein 1	1.86912e+07	1.68741e+07	1.77827e+07	5.45245e-05	0.000146812	0.000100668	4.61439e-05	1299
Q9NPA8	Q9NPA8	ENY2	Transcription and mRNA export factor ENY2	3.10424e+07	1.27318e+07	2.18871e+07	9.05544e-05	0.000110772	0.000100663	1.01088e-05	1300
P29144	P29144	TPP2	Tripeptidyl-peptidase 2	2.78931e+07	1.37871e+07	2.08401e+07	8.13675e-05	0.000119954	0.00010066	1.9293e-05	1301
P13861	P13861	PRKAR2A	cAMP-dependent protein kinase type II-alpha regulatory subunit	3.66685e+07	1.08404e+07	2.37545e+07	0.000106966	9.43167e-05	0.000100642	6.32485e-06	1302
P13797	P13797	PLS3	Plastin-3	2.51111e+07	1.47098e+07	1.99104e+07	7.32521e-05	0.000127982	0.000100617	2.73647e-05	1303
Q13247	Q13247	SRSF6	Serine/arginine-rich splicing factor 6	4.78293e+07	7.09264e+06	2.7461e+07	0.000139524	6.17091e-05	0.000100616	3.89073e-05	1304
Q8NBU5	Q8NBU5	ATAD1	ATPase family AAA domain-containing protein 1	4.67503e+07	7.43665e+06	2.70935e+07	0.000136376	6.47021e-05	0.000100539	3.5837e-05	1305
Q5JPE7	Q5JPE7	NOMO2	Nodal modulator 2	3.56103e+07	1.1156e+07	2.33832e+07	0.000103879	9.70623e-05	0.000100471	3.40859e-06	1306
Q8WWI1-3	Q8WWI1	LMO7	Isoform 3 of LIM domain only protein 7	2.78311e+07	1.37446e+07	2.07878e+07	8.11866e-05	0.000119584	0.000100385	1.91987e-05	1307
P04040	P04040	CAT	Catalase	3.30708e+07	1.19009e+07	2.24859e+07	9.64715e-05	0.000103543	0.000100007	3.53596e-06	1308
O94855-2	O94855	SEC24D	Isoform 2 of Protein transport protein Sec24D	2.92296e+07	1.31741e+07	2.12018e+07	8.52663e-05	0.00011462	9.99432e-05	1.46769e-05	1309
Q13190	Q13190	STX5	Syntaxin-5	3.77598e+07	1.02805e+07	2.40202e+07	0.00011015	8.9445e-05	9.97974e-05	1.03524e-05	1310
Q969G3	Q969G3	SMARCE1	SWI/SNF-related matrix-associated actin-dependent regulator of chromatin subfamily E member 1	3.11332e+07	1.24927e+07	2.18129e+07	9.08191e-05	0.000108692	9.97556e-05	8.93643e-06	1311
Q9BTY2	Q9BTY2	FUCA2	Plasma alpha-L-fucosidase	1.08778e+07	1.92812e+07	1.50795e+07	3.17317e-05	0.000167755	9.97435e-05	6.80118e-05	1312
P55010	P55010	EIF5	Eukaryotic translation initiation factor 5	3.71074e+07	1.04449e+07	2.37762e+07	0.000108247	9.08757e-05	9.95611e-05	8.68546e-06	1313
Q9UMX5	Q9UMX5	NENF	Neudesin	4.03092e+07	9.36582e+06	2.48375e+07	0.000117587	8.14868e-05	9.95367e-05	1.80499e-05	1314
P63151-2	P63151	PPP2R2A	Isoform 2 of Serine/threonine-protein phosphatase 2A 55 kDa regulatory subunit B alpha isoform	2.53449e+07	1.43814e+07	1.98632e+07	7.39342e-05	0.000125125	9.95294e-05	2.55952e-05	1315
Q8WYA6	Q8WYA6	CTNNBL1	Beta-catenin-like protein 1	2.70781e+07	1.37639e+07	2.0421e+07	7.899e-05	0.000119752	9.93711e-05	2.03811e-05	1316
Q13510-2	Q13510	ASAH1	Isoform 2 of Acid ceramidase	2.58223e+07	1.4173e+07	1.99976e+07	7.53266e-05	0.000123312	9.93191e-05	2.39925e-05	1317
Q9UNK0	Q9UNK0	STX8	Syntaxin-8	3.86641e+07	9.81636e+06	2.42402e+07	0.000112788	8.54067e-05	9.90972e-05	1.36905e-05	1318
O43181	O43181	NDUFS4	NADH dehydrogenase [ubiquinone] iron-sulfur protein 4, mitochondrial	3.97743e+07	9.44211e+06	2.46082e+07	0.000116026	8.21506e-05	9.90885e-05	1.69379e-05	1319
Q6NVY1	Q6NVY1	HIBCH	3-hydroxyisobutyryl-CoA hydrolase, mitochondrial	2.53358e+07	1.42606e+07	1.97982e+07	7.39076e-05	0.000124074	9.89907e-05	2.50831e-05	1320
O60911	O60911	CTSV	Cathepsin L2	4.91554e+07	6.26845e+06	2.77119e+07	0.000143392	5.45383e-05	9.89651e-05	4.44269e-05	1321
P53634	P53634	CTSC	Dipeptidyl peptidase 1	3.19025e+07	1.19591e+07	2.19308e+07	9.30634e-05	0.000104049	9.85564e-05	5.493e-06	1322
Q9BZE4	Q9BZE4	GTPBP4	Nucleolar GTP-binding protein 1	3.30743e+07	1.15567e+07	2.23155e+07	9.64815e-05	0.000100548	9.85149e-05	2.03337e-06	1323
P49790	P49790	NUP153	Nuclear pore complex protein Nup153	4.24693e+07	8.35275e+06	2.5411e+07	0.000123888	7.26726e-05	9.82803e-05	2.56077e-05	1324
Q16666	Q16666	IFI16	Gamma-interferon-inducible protein 16	3.42919e+07	1.10385e+07	2.26652e+07	0.000100033	9.60398e-05	9.80366e-05	1.99684e-06	1325
O14656	O14656	TOR1A	Torsin-1A	2.02416e+07	1.56318e+07	1.79367e+07	5.90472e-05	0.000136003	9.75252e-05	3.8478e-05	1326
O43447	O43447	PPIH	Peptidyl-prolyl cis-trans isomerase H	3.71506e+07	9.93939e+06	2.3545e+07	0.000108373	8.64771e-05	9.74249e-05	1.09478e-05	1327
P35556	P35556	FBN2	Fibrillin-2	1.02625e+07	1.88551e+07	1.45588e+07	2.99369e-05	0.000164048	9.69923e-05	6.70554e-05	1328
O60762	O60762	DPM1	Dolichol-phosphate mannosyltransferase subunit 1	3.79352e+07	9.57179e+06	2.37535e+07	0.000110661	8.32788e-05	9.69701e-05	1.36913e-05	1329
O75489	O75489	NDUFS3	NADH dehydrogenase [ubiquinone] iron-sulfur protein 3, mitochondrial	2.63712e+07	1.34475e+07	1.99094e+07	7.69279e-05	0.000117	9.69637e-05	2.00358e-05	1330
Q16543	Q16543	CDC37	Hsp90 co-chaperone Cdc37	2.77706e+07	1.29205e+07	2.03455e+07	8.10101e-05	0.000112414	9.67119e-05	1.57018e-05	1331
O60739	O60739	EIF1B	Eukaryotic translation initiation factor 1b	5.34386e+07	4.26816e+06	2.88534e+07	0.000155887	3.71349e-05	9.65109e-05	5.9376e-05	1332
Q9BWM7	Q9BWM7	SFXN3	Sideroflexin-3	3.1618e+07	1.15005e+07	2.15593e+07	9.22335e-05	0.000100059	9.61464e-05	3.91289e-06	1333
O00267	O00267	SUPT5H	Transcription elongation factor SPT5	3.66864e+07	9.79626e+06	2.32413e+07	0.000107019	8.52318e-05	9.61252e-05	1.08934e-05	1334
P42167	P42167	TMPO	Lamina-associated polypeptide 2, isoforms beta/gamma	2.47607e+07	1.37931e+07	1.92769e+07	7.223e-05	0.000120006	9.61181e-05	2.38881e-05	1335
Q13425	Q13425	SNTB2	Beta-2-syntrophin	2.77621e+07	1.26888e+07	2.02254e+07	8.09853e-05	0.000110398	9.56916e-05	1.47064e-05	1336
Q9Y570-4	Q9Y570	PPME1	Isoform 4 of Protein phosphatase methylesterase 1	4.87524e+07	5.62216e+06	2.71873e+07	0.000142217	4.89153e-05	9.55659e-05	4.66506e-05	1337
O76024	O76024	WFS1	Wolframin	3.34768e+07	1.07357e+07	2.21062e+07	9.76557e-05	9.3405e-05	9.55303e-05	2.12535e-06	1338
Q13620-1	Q13620	CUL4B	Isoform 2 of Cullin-4B	2.83052e+07	1.24552e+07	2.03802e+07	8.25696e-05	0.000108365	9.54675e-05	1.28979e-05	1339
Q9HC07	Q9HC07	TMEM165	Transmembrane protein 165	5.24109e+07	4.33713e+06	2.8374e+07	0.000152889	3.77349e-05	9.53119e-05	5.7577e-05	1340
Q9Y4P3	Q9Y4P3	TBL2	Transducin beta-like protein 2	3.41851e+07	1.03981e+07	2.22916e+07	9.9722e-05	9.0468e-05	9.5095e-05	4.62703e-06	1341
Q96EL3	Q96EL3	MRPL53	39S ribosomal protein L53, mitochondrial	2.62407e+07	1.30209e+07	1.96308e+07	7.65473e-05	0.000113287	9.49173e-05	1.837e-05	1342
Q96FZ7	Q96FZ7	CHMP6	Charged multivesicular body protein 6	4.51386e+07	6.64368e+06	2.58912e+07	0.000131675	5.7803e-05	9.47389e-05	3.69359e-05	1343
Q08J23	Q08J23	NSUN2	tRNA (cytosine(34)-C(5))-methyltransferase	3.68403e+07	9.39171e+06	2.3116e+07	0.000107468	8.17121e-05	9.45898e-05	1.28777e-05	1344
Q08722	Q08722	CD47	Leukocyte surface antigen CD47	2.66497e+07	1.27938e+07	1.97217e+07	7.77403e-05	0.000111312	9.45259e-05	1.67856e-05	1345
P22570-3	P22570	FDXR	Isoform 3 of NADPH:adrenodoxin oxidoreductase, mitochondrial	2.87235e+07	1.2075e+07	2.03993e+07	8.37898e-05	0.000105058	9.4424e-05	1.06342e-05	1346
Q9BRT6	Q9BRT6	LLPH	Protein LLP homolog	3.37917e+07	1.03427e+07	2.20672e+07	9.85744e-05	8.99864e-05	9.42804e-05	4.29402e-06	1347
P49585	P49585	PCYT1A	Choline-phosphate cytidylyltransferase A	5.10252e+07	4.48034e+06	2.77527e+07	0.000148846	3.89809e-05	9.39137e-05	5.49327e-05	1348
Q6UB35	Q6UB35	MTHFD1L	Monofunctional C1-tetrahydrofolate synthase, mitochondrial	3.50852e+07	9.82471e+06	2.24549e+07	0.000102348	8.54793e-05	9.39134e-05	8.43414e-06	1349
Q14204	Q14204	DYNC1H1	Cytoplasmic dynein 1 heavy chain 1	3.23571e+07	1.07006e+07	2.15288e+07	9.43894e-05	9.31e-05	9.37447e-05	6.44738e-07	1350
Q9BYD1	Q9BYD1	MRPL13	39S ribosomal protein L13, mitochondrial	3.93986e+07	8.32765e+06	2.38631e+07	0.00011493	7.24542e-05	9.36923e-05	2.1238e-05	1351
P62495	P62495	ETF1	Eukaryotic peptide chain release factor subunit 1	2.78814e+07	1.21736e+07	2.00275e+07	8.13334e-05	0.000105916	9.36245e-05	1.22911e-05	1352
Q8N5N7	Q8N5N7	MRPL50	39S ribosomal protein L50, mitochondrial	2.80261e+07	1.21124e+07	2.00692e+07	8.17554e-05	0.000105383	9.35691e-05	1.18138e-05	1353
Q15006	Q15006	EMC2	ER membrane protein complex subunit 2	3.27233e+07	1.0527e+07	2.16252e+07	9.54577e-05	9.159e-05	9.35238e-05	1.93386e-06	1354
O60716	O60716	CTNND1	Catenin delta-1	3.15004e+07	1.09266e+07	2.12135e+07	9.18905e-05	9.50665e-05	9.34785e-05	1.58802e-06	1355
Q9UMS0	Q9UMS0	NFU1	NFU1 iron-sulfur cluster scaffold homolog, mitochondrial	2.95555e+07	1.15222e+07	2.05389e+07	8.62169e-05	0.000100248	9.32326e-05	7.01573e-06	1356
O75935	O75935	DCTN3	Dynactin subunit 3	3.77799e+07	8.74145e+06	2.32607e+07	0.000110208	7.60545e-05	9.31315e-05	1.7077e-05	1357
Q15631	Q15631	TSN	Translin	2.71154e+07	1.23046e+07	1.971e+07	7.90987e-05	0.000107055	9.30771e-05	1.39784e-05	1358
Q06136	Q06136	KDSR	3-ketodihydrosphingosine reductase	2.43479e+07	1.32159e+07	1.87819e+07	7.10258e-05	0.000114984	9.30051e-05	2.19793e-05	1359
Q9UNP9	Q9UNP9	PPIE	Peptidyl-prolyl cis-trans isomerase E	3.46187e+07	9.70256e+06	2.21606e+07	0.000100987	8.44166e-05	9.27017e-05	8.28509e-06	1360
Q9UNZ2	Q9UNZ2	NSFL1C	NSFL1 cofactor p47	4.25139e+07	7.03819e+06	2.47761e+07	0.000124018	6.12354e-05	9.26268e-05	3.13914e-05	1361
P61586	P61586	RHOA	Transforming protein RhoA	3.28343e+07	1.0278e+07	2.15561e+07	9.57815e-05	8.94229e-05	9.26022e-05	3.17929e-06	1362
Q9Y3T9	Q9Y3T9	NOC2L	Nucleolar complex protein 2 homolog	4.76096e+07	5.31049e+06	2.646e+07	0.000138883	4.62036e-05	9.25432e-05	4.63396e-05	1363
Q9Y5A9	Q9Y5A9	YTHDF2	YTH domain-containing family protein 2	3.21824e+07	1.04645e+07	2.13234e+07	9.38797e-05	9.10457e-05	9.24627e-05	1.41703e-06	1364
Q9NVP1	Q9NVP1	DDX18	ATP-dependent RNA helicase DDX18	3.33135e+07	1.00154e+07	2.16644e+07	9.71795e-05	8.71382e-05	9.21588e-05	5.02063e-06	1365
Q14566	Q14566	MCM6	DNA replication licensing factor MCM6	4.03439e+07	7.63599e+06	2.399e+07	0.000117688	6.64365e-05	9.20622e-05	2.56258e-05	1366
Q05048	Q05048	CSTF1	Cleavage stimulation factor subunit 1	3.76915e+07	8.52187e+06	2.31067e+07	0.000109951	7.4144e-05	9.20473e-05	1.79033e-05	1367
Q9H0R8-2	Q9H0R8	GABARAPL1	Isoform 2 of Gamma-aminobutyric acid receptor-associated protein-like 1	3.82228e+07	8.33718e+06	2.328e+07	0.000111501	7.25372e-05	9.20188e-05	1.94817e-05	1368
Q9H0D6	Q9H0D6	XRN2	5'-3' exoribonuclease 2	3.34781e+07	9.92725e+06	2.17027e+07	9.76597e-05	8.63715e-05	9.20156e-05	5.64409e-06	1369
P28288	P28288	ABCD3	ATP-binding cassette sub-family D member 3	2.5007e+07	1.27486e+07	1.88778e+07	7.29485e-05	0.000110918	9.19334e-05	1.89849e-05	1370
P54707-2	P54707	ATP12A	Isoform 2 of Potassium-transporting ATPase alpha chain 2	3.21768e+07	1.03422e+07	2.12595e+07	9.38635e-05	8.99817e-05	9.19226e-05	1.94092e-06	1371
Q8IWA4	Q8IWA4	MFN1	Mitofusin-1	1.20996e+07	1.70297e+07	1.45647e+07	3.52959e-05	0.000148166	9.17311e-05	5.64352e-05	1372
Q9Y291	Q9Y291	MRPS33	28S ribosomal protein S33, mitochondrial	2.09748e+07	1.40432e+07	1.7509e+07	6.11859e-05	0.000122182	9.16838e-05	3.04979e-05	1373
Q96AC1-3	Q96AC1	FERMT2	Isoform 3 of Fermitin family homolog 2	1.28347e+07	1.676e+07	1.47973e+07	3.74402e-05	0.00014582	9.16299e-05	5.41897e-05	1374
P13637-3	P13637	ATP1A3	Isoform 3 of Sodium/potassium-transporting ATPase subunit alpha-3	3.12199e+07	1.05774e+07	2.08986e+07	9.10721e-05	9.20278e-05	9.155e-05	4.77834e-07	1375
Q14157-5	Q14157	UBAP2L	Isoform 5 of Ubiquitin-associated protein 2-like	3.28704e+07	1.00135e+07	2.14419e+07	9.58869e-05	8.71215e-05	9.15042e-05	4.3827e-06	1376
Q9Y617	Q9Y617	PSAT1	Phosphoserine aminotransferase	2.31903e+07	1.32563e+07	1.82233e+07	6.7649e-05	0.000115336	9.14924e-05	2.38434e-05	1377
Q9Y6Y8	Q9Y6Y8	SEC23IP	SEC23-interacting protein	3.59377e+07	8.94205e+06	2.24399e+07	0.000104834	7.77998e-05	9.13171e-05	1.35173e-05	1378
P14635	P14635	CCNB1	G2/mitotic-specific cyclin-B1	996514	2.06457e+07	1.08211e+07	2.90695e-06	0.000179626	9.12667e-05	8.83597e-05	1379
O43776	O43776	NARS	Asparagine--tRNA ligase, cytoplasmic	3.82121e+07	8.1561e+06	2.31841e+07	0.000111469	7.09617e-05	9.12155e-05	2.02538e-05	1380
Q9BWS9	Q9BWS9	CHID1	Chitinase domain-containing protein 1	2.44625e+07	1.27527e+07	1.86076e+07	7.136e-05	0.000110955	9.11572e-05	1.97973e-05	1381
Q9UJS0-2	Q9UJS0	SLC25A13	Isoform 2 of Calcium-binding mitochondrial carrier protein Aralar2	2.49283e+07	1.2585e+07	1.87566e+07	7.27188e-05	0.000109495	9.11068e-05	1.83879e-05	1382
Q96A26	Q96A26	FAM162A	Protein FAM162A	1.67431e+07	1.52797e+07	1.60114e+07	4.88417e-05	0.00013294	9.08908e-05	4.2049e-05	1383
Q99519	Q99519	NEU1	Sialidase-1	2.86894e+07	1.12604e+07	1.99749e+07	8.36903e-05	9.79705e-05	9.08304e-05	7.14009e-06	1384
O60841	O60841	EIF5B	Eukaryotic translation initiation factor 5B	3.28259e+07	9.85861e+06	2.13423e+07	9.5757e-05	8.57743e-05	9.07657e-05	4.99137e-06	1385
Q9P015	Q9P015	MRPL15	39S ribosomal protein L15, mitochondrial	3.53831e+07	8.94488e+06	2.2164e+07	0.000103217	7.78244e-05	9.05206e-05	1.26962e-05	1386
P35080	P35080	PFN2	Profilin-2	1.93877e+07	1.43036e+07	1.68456e+07	5.65562e-05	0.000124447	9.05018e-05	3.39456e-05	1387
Q13573	Q13573	SNW1	SNW domain-containing protein 1	3.73249e+07	8.25847e+06	2.27917e+07	0.000108881	7.18524e-05	9.03667e-05	1.85143e-05	1388
Q92544	Q92544	TM9SF4	Transmembrane 9 superfamily member 4	2.82577e+07	1.12898e+07	1.97737e+07	8.2431e-05	9.82262e-05	9.03286e-05	7.89758e-06	1389
Q7L775	Q7L775	EPM2AIP1	EPM2A-interacting protein 1	8.80253e+06	1.77824e+07	1.32925e+07	2.5678e-05	0.000154715	9.01965e-05	6.45185e-05	1390
P02792	P02792	FTL	Ferritin light chain	1.39694e+07	1.60323e+07	1.50008e+07	4.07503e-05	0.000139488	9.01193e-05	4.93691e-05	1391
Q8TAT6-2	Q8TAT6	NPLOC4	Isoform 2 of Nuclear protein localization protein 4 homolog	3.90616e+07	7.60078e+06	2.33312e+07	0.000113947	6.61302e-05	9.00388e-05	2.39086e-05	1392
P50897	P50897	PPT1	Palmitoyl-protein thioesterase 1	2.36656e+07	1.27621e+07	1.82139e+07	6.90354e-05	0.000111036	9.00356e-05	2.10002e-05	1393
O96011	O96011	PEX11B	Peroxisomal membrane protein 11B	1.33928e+07	1.62014e+07	1.47971e+07	3.90684e-05	0.000140959	9.00139e-05	5.09455e-05	1394
O14579	O14579	COPE	Coatomer subunit epsilon	2.251e+07	1.31401e+07	1.7825e+07	6.56642e-05	0.000114325	8.99945e-05	2.43303e-05	1395
Q8IVL6	Q8IVL6	P3H3	Prolyl 3-hydroxylase 3	2.45301e+07	1.2462e+07	1.8496e+07	7.15571e-05	0.000108425	8.99909e-05	1.84338e-05	1396
Q8IXM3	Q8IXM3	MRPL41	39S ribosomal protein L41, mitochondrial	3.92719e+07	7.47954e+06	2.33757e+07	0.000114561	6.50753e-05	8.9818e-05	2.47427e-05	1397
O75506	O75506	HSBP1	Heat shock factor-binding protein 1	3.26827e+07	9.6647e+06	2.11737e+07	9.53392e-05	8.40872e-05	8.97132e-05	5.62601e-06	1398
Q9NZJ7	Q9NZJ7	MTCH1	Mitochondrial carrier homolog 1	1.5599e+07	1.53652e+07	1.54821e+07	4.55042e-05	0.000133684	8.95943e-05	4.40901e-05	1399
Q96C01	Q96C01	FAM136A	Protein FAM136A	4.63901e+07	5.02869e+06	2.57094e+07	0.000135325	4.37518e-05	8.95386e-05	4.57868e-05	1400
Q9BY44	Q9BY44	EIF2A	Eukaryotic translation initiation factor 2A	2.92828e+07	1.07254e+07	2.00041e+07	8.54215e-05	9.3316e-05	8.93687e-05	3.94722e-06	1401
Q96D15	Q96D15	RCN3	Reticulocalbin-3	2.42056e+07	1.23536e+07	1.82796e+07	7.06106e-05	0.000107482	8.90464e-05	1.84358e-05	1402
P02794	P02794	FTH1	Ferritin heavy chain	1.75551e+07	1.45767e+07	1.60659e+07	5.12103e-05	0.000126824	8.9017e-05	3.78067e-05	1403
Q9BWH2	Q9BWH2	FUNDC2	FUN14 domain-containing protein 2	2.99253e+07	1.03961e+07	2.01607e+07	8.72956e-05	9.04504e-05	8.8873e-05	1.5774e-06	1404
P82650	P82650	MRPS22	28S ribosomal protein S22, mitochondrial	4.19042e+07	6.3682e+06	2.41362e+07	0.000122239	5.54062e-05	8.88228e-05	3.34166e-05	1405
Q53H12	Q53H12	AGK	Acylglycerol kinase, mitochondrial	3.31933e+07	9.28249e+06	2.12379e+07	9.68287e-05	8.07618e-05	8.87953e-05	8.03346e-06	1406
P55060	P55060	CSE1L	Exportin-2	3.00642e+07	1.033e+07	2.01971e+07	8.7701e-05	8.98755e-05	8.87882e-05	1.08726e-06	1407
Q8TAQ2	Q8TAQ2	SMARCC2	SWI/SNF complex subunit SMARCC2	3.25665e+07	9.44598e+06	2.10062e+07	9.50002e-05	8.21842e-05	8.85922e-05	6.40801e-06	1408
Q9BQG0-2	Q9BQG0	MYBBP1A	Isoform 2 of Myb-binding protein 1A	2.89773e+07	1.05703e+07	1.97738e+07	8.45301e-05	9.19666e-05	8.82483e-05	3.71826e-06	1409
P11413-2	P11413	G6PD	Isoform Long of Glucose-6-phosphate 1-dehydrogenase	1.92606e+07	1.38274e+07	1.6544e+07	5.61855e-05	0.000120304	8.82449e-05	3.20594e-05	1410
P16383	P16383	GCFC2	GC-rich sequence DNA-binding factor 2	5.98312e+07	201443	3.00163e+07	0.000174535	1.75265e-06	8.81437e-05	8.6391e-05	1411
Q8N511	Q8N511	TMEM199	Transmembrane protein 199	5.63609e+07	1.35999e+06	2.88604e+07	0.000164411	1.18325e-05	8.8122e-05	7.62894e-05	1412
P07205	P07205	PGK2	Phosphoglycerate kinase 2	2.37613e+07	1.22347e+07	1.7998e+07	6.93147e-05	0.000106447	8.7881e-05	1.85664e-05	1413
P15927-3	P15927	RPA2	Isoform 3 of Replication protein A 32 kDa subunit	2.48869e+07	1.18223e+07	1.83546e+07	7.2598e-05	0.000102859	8.77287e-05	1.51307e-05	1414
Q96DI7	Q96DI7	SNRNP40	U5 small nuclear ribonucleoprotein 40 kDa protein	3.58406e+07	8.09077e+06	2.19657e+07	0.000104551	7.03933e-05	8.74723e-05	1.7079e-05	1415
P24928	P24928	POLR2A	DNA-directed RNA polymerase II subunit RPB1	3.97448e+07	6.73547e+06	2.32401e+07	0.00011594	5.86016e-05	8.72709e-05	2.86693e-05	1416
Q4G0F5	Q4G0F5	VPS26B	Vacuolar protein sorting-associated protein 26B	6.00509e+06	1.80299e+07	1.20175e+07	1.75176e-05	0.000156868	8.7193e-05	6.96754e-05	1417
P55290-4	P55290	CDH13	Isoform 4 of Cadherin-13	8.36719e+06	1.72008e+07	1.2784e+07	2.44081e-05	0.000149654	8.70312e-05	6.26231e-05	1418
Q92973	Q92973	TNPO1	Transportin-1	2.51023e+07	1.15321e+07	1.83172e+07	7.32265e-05	0.000100334	8.67803e-05	1.35539e-05	1419
Q8NFH5	Q8NFH5	NUP35	Nucleoporin NUP53	3.0836e+07	9.60455e+06	2.02203e+07	8.99522e-05	8.35639e-05	8.6758e-05	3.19415e-06	1420
P30419	P30419	NMT1	Glycylpeptide N-tetradecanoyltransferase 1	2.95526e+07	9.98801e+06	1.97703e+07	8.62084e-05	8.69001e-05	8.65542e-05	3.45859e-07	1421
P35555	P35555	FBN1	Fibrillin-1	1.41334e+07	1.51517e+07	1.46425e+07	4.12287e-05	0.000131826	8.65276e-05	4.52988e-05	1422
Q9NUP9	Q9NUP9	LIN7C	Protein lin-7 homolog C	2.72452e+07	1.07455e+07	1.89954e+07	7.94775e-05	9.34909e-05	8.64842e-05	7.00668e-06	1423
Q8WVM8	Q8WVM8	SCFD1	Sec1 family domain-containing protein 1	2.47144e+07	1.157e+07	1.81422e+07	7.20949e-05	0.000100664	8.63797e-05	1.42847e-05	1424
Q8WUM4-2	Q8WUM4	PDCD6IP	Isoform 2 of Programmed cell death 6-interacting protein	2.95374e+07	9.94113e+06	1.97393e+07	8.61642e-05	8.64923e-05	8.63282e-05	1.64037e-07	1425
P13984	P13984	GTF2F2	General transcription factor IIF subunit 2	3.68778e+07	7.43866e+06	2.21582e+07	0.000107577	6.47196e-05	8.61482e-05	2.14286e-05	1426
Q6PIU2-2	Q6PIU2	NCEH1	Isoform 2 of Neutral cholesterol ester hydrolase 1	3.53508e+07	7.94769e+06	2.16492e+07	0.000103122	6.91484e-05	8.61354e-05	1.6987e-05	1427
P26583	P26583	HMGB2	High mobility group protein B2	2.89308e+07	1.00863e+07	1.95086e+07	8.43946e-05	8.77554e-05	8.6075e-05	1.6804e-06	1428
O60313-2	O60313	OPA1	Isoform 2 of Dynamin-like 120 kDa protein, mitochondrial	3.09651e+07	9.40058e+06	2.01829e+07	9.03289e-05	8.17892e-05	8.60591e-05	4.26985e-06	1429
Q9UNH7	Q9UNH7	SNX6	Sorting nexin-6	2.70527e+07	1.0709e+07	1.88809e+07	7.89161e-05	9.31729e-05	8.60445e-05	7.12843e-06	1430
Q969E2	Q969E2	SCAMP4	Secretory carrier-associated membrane protein 4	3.54196e+07	7.89276e+06	2.16562e+07	0.000103323	6.86705e-05	8.59969e-05	1.73264e-05	1431
P10768	P10768	ESD	S-formylglutathione hydrolase	3.53202e+07	7.89208e+06	2.16061e+07	0.000103033	6.86646e-05	8.58488e-05	1.71843e-05	1432
P09104	P09104	ENO2	Gamma-enolase	3.76006e+07	7.11518e+06	2.23579e+07	0.000109685	6.19052e-05	8.57953e-05	2.38901e-05	1433
P42285	P42285	SKIV2L2	Superkiller viralicidic activity 2-like 2	3.97456e+07	6.36866e+06	2.30571e+07	0.000115943	5.54102e-05	8.56764e-05	3.02662e-05	1434
O75746	O75746	SLC25A12	Calcium-binding mitochondrial carrier protein Aralar1	2.51636e+07	1.1257e+07	1.82103e+07	7.34053e-05	9.79405e-05	8.56729e-05	1.22676e-05	1435
Q9Y6W5	Q9Y6W5	WASF2	Wiskott-Aldrich syndrome protein family member 2	1.04719e+07	1.61822e+07	1.33271e+07	3.05478e-05	0.000140793	8.56702e-05	5.51224e-05	1436
Q16630-2	Q16630	CPSF6	Isoform 2 of Cleavage and polyadenylation specificity factor subunit 6	3.77148e+07	7.02237e+06	2.23686e+07	0.000110019	6.10978e-05	8.55582e-05	2.44604e-05	1437
Q9BT78	Q9BT78	COPS4	COP9 signalosome complex subunit 4	3.47976e+07	7.99509e+06	2.13963e+07	0.000101509	6.95609e-05	8.55347e-05	1.59739e-05	1438
Q9Y3D9	Q9Y3D9	MRPS23	28S ribosomal protein S23, mitochondrial	3.51347e+07	7.86484e+06	2.14998e+07	0.000102492	6.84276e-05	8.54599e-05	1.70323e-05	1439
Q93009	Q93009	USP7	Ubiquitin carboxyl-terminal hydrolase 7	2.56236e+07	1.1024e+07	1.83238e+07	7.47471e-05	9.59134e-05	8.53302e-05	1.05831e-05	1440
Q9UQR1	Q9UQR1	ZNF148	Zinc finger protein 148	2.49081e+07	1.1263e+07	1.80856e+07	7.266e-05	9.79932e-05	8.53266e-05	1.26666e-05	1441
Q9UIG0	Q9UIG0	BAZ1B	Tyrosine-protein kinase BAZ1B	2.53852e+07	1.10993e+07	1.82423e+07	7.40517e-05	9.65686e-05	8.53102e-05	1.12584e-05	1442
Q16540	Q16540	MRPL23	39S ribosomal protein L23, mitochondrial	2.01662e+07	1.28482e+07	1.65072e+07	5.88272e-05	0.000111785	8.53063e-05	2.64791e-05	1443
Q9UK76	Q9UK76	HN1	Hematological and neurological expressed 1 protein	4.29314e+07	5.20533e+06	2.40684e+07	0.000125236	4.52886e-05	8.52623e-05	3.99737e-05	1444
P45974	P45974	USP5	Ubiquitin carboxyl-terminal hydrolase 5	3.15151e+07	9.02784e+06	2.02715e+07	9.19332e-05	7.85462e-05	8.52397e-05	6.69348e-06	1445
P33121	P33121	ACSL1	Long-chain-fatty-acid--CoA ligase 1	2.10796e+07	1.25252e+07	1.68024e+07	6.14917e-05	0.000108975	8.52332e-05	2.37415e-05	1446
O75368	O75368	SH3BGRL	SH3 domain-binding glutamic acid-rich-like protein	2.68116e+07	1.05962e+07	1.87039e+07	7.82125e-05	9.2192e-05	8.52023e-05	6.98973e-06	1447
Q9Y263	Q9Y263	PLAA	Phospholipase A-2-activating protein	3.90585e+07	6.48543e+06	2.2772e+07	0.000113938	5.64261e-05	8.51823e-05	2.87561e-05	1448
Q13123	Q13123	IK	Protein Red	3.20525e+07	8.79951e+06	2.0426e+07	9.35009e-05	7.65596e-05	8.50303e-05	8.47067e-06	1449
Q8TAD7	Q8TAD7	OCC1	Overexpressed in colon carcinoma 1 protein	4.24538e+06	1.80854e+07	1.11654e+07	1.23843e-05	0.000157351	8.48678e-05	7.24835e-05	1450
Q6DKI1	Q6DKI1	RPL7L1	60S ribosomal protein L7-like 1	3.6486e+07	7.26996e+06	2.1878e+07	0.000106434	6.32519e-05	8.4843e-05	2.15911e-05	1451
O14657	O14657	TOR1B	Torsin-1B	2.66059e+07	1.05211e+07	1.85635e+07	7.76126e-05	9.15386e-05	8.45756e-05	6.96302e-06	1452
O14776	O14776	TCERG1	Transcription elongation regulator 1	3.2099e+07	8.66838e+06	2.03837e+07	9.36366e-05	7.54188e-05	8.45277e-05	9.10891e-06	1453
Q9BVC6	Q9BVC6	TMEM109	Transmembrane protein 109	2.10818e+07	1.23519e+07	1.67169e+07	6.14982e-05	0.000107467	8.44827e-05	2.29845e-05	1454
P21266	P21266	GSTM3	Glutathione S-transferase Mu 3	3.5031e+07	7.67443e+06	2.13527e+07	0.000102189	6.67709e-05	8.44802e-05	1.77092e-05	1455
O15127	O15127	SCAMP2	Secretory carrier-associated membrane protein 2	1.65891e+07	1.383e+07	1.52095e+07	4.83923e-05	0.000120327	8.43597e-05	3.59673e-05	1456
Q9Y285	Q9Y285	FARSA	Phenylalanine--tRNA ligase alpha subunit	2.82277e+07	9.90989e+06	1.90688e+07	8.23434e-05	8.62205e-05	8.42819e-05	1.93853e-06	1457
Q9NWB6	Q9NWB6	ARGLU1	Arginine and glutamate-rich protein 1	3.0846e+07	8.99893e+06	1.99225e+07	8.99816e-05	7.82947e-05	8.41381e-05	5.84345e-06	1458
O43660	O43660	PLRG1	Pleiotropic regulator 1	1.60022e+07	1.3969e+07	1.49856e+07	4.66802e-05	0.000121537	8.41085e-05	3.74283e-05	1459
Q99627	Q99627	COPS8	COP9 signalosome complex subunit 8	2.38888e+07	1.13034e+07	1.75961e+07	6.96864e-05	9.83446e-05	8.40155e-05	1.43291e-05	1460
Q96J01	Q96J01	THOC3	THO complex subunit 3	3.17575e+07	8.66195e+06	2.02097e+07	9.26404e-05	7.53628e-05	8.40016e-05	8.6388e-06	1461
O43818	O43818	RRP9	U3 small nucleolar RNA-interacting protein 2	2.3222e+07	1.15232e+07	1.73726e+07	6.77414e-05	0.000100257	8.39993e-05	1.62579e-05	1462
Q14739	Q14739	LBR	Lamin-B receptor	3.1311e+07	8.74866e+06	2.00298e+07	9.1338e-05	7.61172e-05	8.37276e-05	7.61037e-06	1463
Q9H7Z7	Q9H7Z7	PTGES2	Prostaglandin E synthase 2	2.67016e+07	1.01862e+07	1.84439e+07	7.78916e-05	8.86241e-05	8.32579e-05	5.36625e-06	1464
Q9P2J5	Q9P2J5	LARS	Leucine--tRNA ligase, cytoplasmic	3.14363e+07	8.59509e+06	2.00157e+07	9.17034e-05	7.47811e-05	8.32422e-05	8.46115e-06	1465
Q9UQE7	Q9UQE7	SMC3	Structural maintenance of chromosomes protein 3	2.93509e+07	9.28042e+06	1.93157e+07	8.56202e-05	8.07438e-05	8.3182e-05	2.43822e-06	1466
Q15532	Q15532	SS18	Protein SSXT	3.33722e+07	7.92157e+06	2.06469e+07	9.73505e-05	6.89212e-05	8.31359e-05	1.42147e-05	1467
P09110	P09110	ACAA1	3-ketoacyl-CoA thiolase, peroxisomal	2.52248e+07	1.06142e+07	1.79195e+07	7.35837e-05	9.23481e-05	8.29659e-05	9.38222e-06	1468
P31937	P31937	HIBADH	3-hydroxyisobutyrate dehydrogenase, mitochondrial	2.55805e+07	1.04862e+07	1.80333e+07	7.46214e-05	9.12345e-05	8.29279e-05	8.30654e-06	1469
Q15582	Q15582	TGFBI	Transforming growth factor-beta-induced protein ig-h3	1.74798e+07	1.31843e+07	1.5332e+07	5.09906e-05	0.000114709	8.28497e-05	3.18591e-05	1470
P18754-2	P18754	RCC1	Isoform 2 of Regulator of chromosome condensation	2.97778e+07	9.04797e+06	1.94129e+07	8.68653e-05	7.87214e-05	8.27933e-05	4.07196e-06	1471
O43681	O43681	ASNA1	ATPase ASNA1	2.00286e+07	1.22851e+07	1.61568e+07	5.84259e-05	0.000106885	8.26557e-05	2.42298e-05	1472
Q9UJM3	Q9UJM3	ERRFI1	ERBB receptor feedback inhibitor 1	2.83133e+07		2.83133e+07	8.25932e-05		8.25932e-05		1473
Q9H3Z4	Q9H3Z4	DNAJC5	DnaJ homolog subfamily C member 5	2.7779e+07	9.67117e+06	1.87251e+07	8.10346e-05	8.41435e-05	8.2589e-05	1.55445e-06	1474
Q9NUJ1	Q9NUJ1	ABHD10	Mycophenolic acid acyl-glucuronide esterase, mitochondrial	3.65709e+07	6.71903e+06	2.1645e+07	0.000106682	5.84586e-05	8.25702e-05	2.41116e-05	1475
Q96DV4	Q96DV4	MRPL38	39S ribosomal protein L38, mitochondrial	1.09697e+07	1.5302e+07	1.31359e+07	3.19999e-05	0.000133134	8.25672e-05	5.05673e-05	1476
P17655	P17655	CAPN2	Calpain-2 catalytic subunit	1.91257e+07	1.25204e+07	1.5823e+07	5.57919e-05	0.000108933	8.23624e-05	2.65705e-05	1477
P12931-2	P12931	SRC	Isoform 2 of Proto-oncogene tyrosine-protein kinase Src	4.68275e+07	3.2294e+06	2.50284e+07	0.000136601	2.80972e-05	8.23492e-05	5.4252e-05	1478
Q9HD42	Q9HD42	CHMP1A	Charged multivesicular body protein 1a	3.17986e+07	8.26275e+06	2.00307e+07	9.27602e-05	7.18896e-05	8.23249e-05	1.04353e-05	1479
Q9UKX7	Q9UKX7	NUP50	Nuclear pore complex protein Nup50	3.6431e+07	6.66417e+06	2.15476e+07	0.000106274	5.79813e-05	8.21274e-05	2.41462e-05	1480
Q9UHV9	Q9UHV9	PFDN2	Prefoldin subunit 2	4.26927e+07	4.50561e+06	2.35991e+07	0.00012454	3.92008e-05	8.18702e-05	4.26694e-05	1481
Q9UHQ9	Q9UHQ9	CYB5R1	NADH-cytochrome b5 reductase 1	2.07194e+07	1.18294e+07	1.62744e+07	6.0441e-05	0.000102921	8.16812e-05	2.12402e-05	1482
P61077-3	P61077	UBE2D3	Isoform 3 of Ubiquitin-conjugating enzyme E2 D3	3.00481e+07	8.68141e+06	1.93648e+07	8.76539e-05	7.55321e-05	8.1593e-05	6.06093e-06	1483
P37235	P37235	HPCAL1	Hippocalcin-like protein 1	3.61266e+07	6.62852e+06	2.13776e+07	0.000105386	5.76711e-05	8.15283e-05	2.38572e-05	1484
Q8NBX0	Q8NBX0	SCCPDH	Saccharopine dehydrogenase-like oxidoreductase	2.53103e+07	1.0201e+07	1.77556e+07	7.38332e-05	8.8753e-05	8.12931e-05	7.45993e-06	1485
Q9NQ50	Q9NQ50	MRPL40	39S ribosomal protein L40, mitochondrial	2.29748e+07	1.09763e+07	1.69756e+07	6.70203e-05	9.54989e-05	8.12596e-05	1.42393e-05	1486
Q9NZ08-2	Q9NZ08	ERAP1	Isoform 2 of Endoplasmic reticulum aminopeptidase 1	2.1174e+07	1.15724e+07	1.63732e+07	6.1767e-05	0.000100685	8.12261e-05	1.9459e-05	1487
Q9GZZ1	Q9GZZ1	NAA50	N-alpha-acetyltransferase 50	2.93361e+07	8.83115e+06	1.90836e+07	8.5577e-05	7.6835e-05	8.1206e-05	4.37099e-06	1488
P20020	P20020	ATP2B1	Plasma membrane calcium-transporting ATPase 1	2.44463e+07	1.04416e+07	1.7444e+07	7.13129e-05	9.08465e-05	8.10797e-05	9.76681e-06	1489
Q8NI22	Q8NI22	MCFD2	Multiple coagulation factor deficiency protein 2	3.16759e+07	8.0176e+06	1.98468e+07	9.24024e-05	6.97567e-05	8.10795e-05	1.13228e-05	1490
P49753	P49753	ACOT2	Acyl-coenzyme A thioesterase 2, mitochondrial	1.0884e+07	1.49492e+07	1.29166e+07	3.17499e-05	0.000130064	8.09071e-05	4.91572e-05	1491
Q9BVP2	Q9BVP2	GNL3	Guanine nucleotide-binding protein-like 3	3.23844e+07	7.72544e+06	2.00549e+07	9.44692e-05	6.72148e-05	8.0842e-05	1.36272e-05	1492
O75306	O75306	NDUFS2	NADH dehydrogenase [ubiquinone] iron-sulfur protein 2, mitochondrial	3.34077e+07	7.37332e+06	2.03905e+07	9.74542e-05	6.41511e-05	8.08027e-05	1.66515e-05	1493
P23193	P23193	TCEA1	Transcription elongation factor A protein 1	3.35162e+07	7.32278e+06	2.04195e+07	9.77708e-05	6.37114e-05	8.07411e-05	1.70297e-05	1494
Q9BW60	Q9BW60	ELOVL1	Elongation of very long chain fatty acids protein 1	2.36442e+07	1.06153e+07	1.71297e+07	6.89728e-05	9.23577e-05	8.06653e-05	1.16925e-05	1495
Q9HD26	Q9HD26	GOPC	Golgi-associated PDZ and coiled-coil motif-containing protein	1.66783e+07	1.294e+07	1.48091e+07	4.86525e-05	0.000112584	8.06181e-05	3.19656e-05	1496
Q7Z434	Q7Z434	MAVS	Mitochondrial antiviral-signaling protein	2.10291e+07	1.14743e+07	1.62517e+07	6.13444e-05	9.98315e-05	8.05879e-05	1.92436e-05	1497
O00217	O00217	NDUFS8	NADH dehydrogenase [ubiquinone] iron-sulfur protein 8, mitochondrial	3.18559e+07	7.83819e+06	1.98471e+07	9.29275e-05	6.81957e-05	8.05616e-05	1.23659e-05	1498
Q9Y3A2	Q9Y3A2	UTP11	Probable U3 small nucleolar RNA-associated protein 11	3.36634e+07	7.2283e+06	2.04458e+07	9.82001e-05	6.28894e-05	8.05447e-05	1.76553e-05	1499
P11047	P11047	LAMC1	Laminin subunit gamma-1	2.93419e+07	8.66934e+06	1.90056e+07	8.55939e-05	7.54271e-05	8.05105e-05	5.08337e-06	1500
Q7Z3B4	Q7Z3B4	NUP54	Nucleoporin p54	2.34802e+07	1.05837e+07	1.70319e+07	6.84945e-05	9.20828e-05	8.02886e-05	1.17942e-05	1501
O60832	O60832	DKC1	H/ACA ribonucleoprotein complex subunit 4	2.87572e+07	8.79769e+06	1.87775e+07	8.38882e-05	7.65438e-05	8.0216e-05	3.67221e-06	1502
O15126	O15126	SCAMP1	Secretory carrier-associated membrane protein 1	3.38938e+07	7.04556e+06	2.04697e+07	9.88723e-05	6.12995e-05	8.00859e-05	1.87864e-05	1503
O43677	O43677	NDUFC1	NADH dehydrogenase [ubiquinone] 1 subunit C1, mitochondrial	2.29586e+07	1.06911e+07	1.68248e+07	6.6973e-05	9.3017e-05	7.9995e-05	1.3022e-05	1504
Q9H0U4	Q9H0U4	RAB1B	Ras-related protein Rab-1B	2.88563e+07	8.70755e+06	1.87819e+07	8.41772e-05	7.57595e-05	7.99683e-05	4.20883e-06	1505
P15408	P15408	FOSL2	Fos-related antigen 2	6.83332e+06	1.60525e+07	1.14429e+07	1.99336e-05	0.000139664	7.97988e-05	5.98652e-05	1506
Q9BY77	Q9BY77	POLDIP3	Polymerase delta-interacting protein 3	3.09372e+07	7.94519e+06	1.94412e+07	9.02475e-05	6.91267e-05	7.96871e-05	1.05604e-05	1507
Q14839-2	Q14839	CHD4	Isoform 2 of Chromodomain-helicase-DNA-binding protein 4	3.07322e+07	7.97479e+06	1.93535e+07	8.96494e-05	6.93842e-05	7.95168e-05	1.01326e-05	1508
O75569	O75569	PRKRA	Interferon-inducible double-stranded RNA-dependent protein kinase activator A	1.99251e+07	1.15787e+07	1.57519e+07	5.8124e-05	0.00010074	7.94319e-05	2.13079e-05	1509
O95298	O95298	NDUFC2	NADH dehydrogenase [ubiquinone] 1 subunit C2	2.11947e+07	1.11417e+07	1.61682e+07	6.18276e-05	9.69381e-05	7.93828e-05	1.75553e-05	1510
P40616	P40616	ARL1	ADP-ribosylation factor-like protein 1	3.48069e+07	6.56525e+06	2.06861e+07	0.000101536	5.71206e-05	7.93282e-05	2.22076e-05	1511
P53814-6	P53814	SMTN	Isoform B3 of Smoothelin	4.11105e+07	4.43428e+06	2.27724e+07	0.000119924	3.85802e-05	7.92521e-05	4.06719e-05	1512
Q9BQC6	Q9BQC6	MRPL57	Ribosomal protein 63, mitochondrial	1.65181e+07	1.26553e+07	1.45867e+07	4.81851e-05	0.000110107	7.91461e-05	3.09609e-05	1513
Q6P161	Q6P161	MRPL54	39S ribosomal protein L54, mitochondrial	3.10794e+07	7.75414e+06	1.94168e+07	9.06624e-05	6.74645e-05	7.90634e-05	1.15989e-05	1514
Q9Y4G6	Q9Y4G6	TLN2	Talin-2	2.34414e+07	1.03048e+07	1.68731e+07	6.83812e-05	8.96559e-05	7.90186e-05	1.06374e-05	1515
Q13277	Q13277	STX3	Syntaxin-3	2.40951e+07	1.00605e+07	1.70778e+07	7.02884e-05	8.75305e-05	7.89094e-05	8.62106e-06	1516
Q9Y673	Q9Y673	ALG5	Dolichyl-phosphate beta-glucosyltransferase	2.41159e+07	1.00464e+07	1.70812e+07	7.03489e-05	8.74086e-05	7.88787e-05	8.52985e-06	1517
P53990-5	P53990	IST1	Isoform 5 of IST1 homolog	3.49406e+07	6.41414e+06	2.06774e+07	0.000101926	5.58059e-05	7.88659e-05	2.30601e-05	1518
Q9BYD6	Q9BYD6	MRPL1	39S ribosomal protein L1, mitochondrial	1.6503e+07	1.25692e+07	1.45361e+07	4.81412e-05	0.000109358	7.87494e-05	3.06083e-05	1519
P17813	P17813	ENG	Endoglin	2.21684e+07	1.06599e+07	1.64142e+07	6.4668e-05	9.2746e-05	7.8707e-05	1.4039e-05	1520
Q07812-2	Q07812	BAX	Isoform Beta of Apoptosis regulator BAX	2.08332e+07	1.10952e+07	1.59642e+07	6.0773e-05	9.65332e-05	7.86531e-05	1.78801e-05	1521
Q96DB5	Q96DB5	RMDN1	Regulator of microtubule dynamics protein 1	1.8671e+07	1.18017e+07	1.52364e+07	5.44656e-05	0.00010268	7.85729e-05	2.41073e-05	1522
Q15050	Q15050	RRS1	Ribosome biogenesis regulatory protein homolog	2.29482e+07	1.03417e+07	1.6645e+07	6.69427e-05	8.99772e-05	7.84599e-05	1.15173e-05	1523
Q96DZ1	Q96DZ1	ERLEC1	Endoplasmic reticulum lectin 1	3.78225e+07	5.34436e+06	2.15834e+07	0.000110333	4.64983e-05	7.84155e-05	3.19171e-05	1524
Q9UHA4	Q9UHA4	LAMTOR3	Ragulator complex protein LAMTOR3	2.51979e+07	9.53835e+06	1.73681e+07	7.35053e-05	8.29878e-05	7.82466e-05	4.74128e-06	1525
Q9BTU6	Q9BTU6	PI4K2A	Phosphatidylinositol 4-kinase type 2-alpha	2.17625e+07	1.0682e+07	1.62223e+07	6.34839e-05	9.29383e-05	7.82111e-05	1.47272e-05	1526
Q12981	Q12981	BNIP1	Vesicle transport protein SEC20	3.66163e+07	5.68919e+06	2.11527e+07	0.000106814	4.94985e-05	7.81563e-05	2.86578e-05	1527
Q92747	Q92747	ARPC1A	Actin-related protein 2/3 complex subunit 1A	2.23109e+07	1.04828e+07	1.63969e+07	6.50837e-05	9.12049e-05	7.81443e-05	1.30606e-05	1528
Q96GE9	Q96GE9	TMEM261	Transmembrane protein 261	1.65179e+07	1.24208e+07	1.44694e+07	4.81847e-05	0.000108067	7.81258e-05	2.99411e-05	1529
P12268	P12268	IMPDH2	Inosine-5'-monophosphate dehydrogenase 2	3.07112e+07	7.64388e+06	1.91775e+07	8.95882e-05	6.65052e-05	7.80467e-05	1.15415e-05	1530
Q15836	Q15836	VAMP3	Vesicle-associated membrane protein 3	2.09266e+07	1.09212e+07	1.59239e+07	6.10453e-05	9.50192e-05	7.80322e-05	1.6987e-05	1531
P42224	P42224	STAT1	Signal transducer and activator of transcription 1-alpha/beta	2.26111e+07	1.03149e+07	1.6463e+07	6.59592e-05	8.97445e-05	7.78518e-05	1.18927e-05	1532
Q8WU90	Q8WU90	ZC3H15	Zinc finger CCCH domain-containing protein 15	3.0198e+07	7.73731e+06	1.89676e+07	8.80911e-05	6.73181e-05	7.77046e-05	1.03865e-05	1533
Q96AQ6	Q96AQ6	PBXIP1	Pre-B-cell leukemia transcription factor-interacting protein 1	3.12342e+07	7.36582e+06	1.93e+07	9.11139e-05	6.40859e-05	7.75999e-05	1.3514e-05	1534
Q02880	Q02880	TOP2B	DNA topoisomerase 2-beta	2.53749e+07	9.27972e+06	1.73273e+07	7.40214e-05	8.07376e-05	7.73795e-05	3.3581e-06	1535
Q9NRX1	Q9NRX1	PNO1	RNA-binding protein PNO1	2.69847e+07	8.71313e+06	1.78489e+07	7.87176e-05	7.58081e-05	7.72628e-05	1.45474e-06	1536
P62330	P62330	ARF6	ADP-ribosylation factor 6	1.35159e+07	1.32231e+07	1.33695e+07	3.94274e-05	0.000115047	7.72371e-05	3.78097e-05	1537
Q9NZR1	Q9NZR1	TMOD2	Tropomodulin-2	1.49196e+07	1.27296e+07	1.38246e+07	4.35221e-05	0.000110753	7.71376e-05	3.36155e-05	1538
P28482	P28482	MAPK1	Mitogen-activated protein kinase 1	2.71151e+07	8.63082e+06	1.78729e+07	7.90978e-05	7.5092e-05	7.70949e-05	2.00294e-06	1539
Q92878-2	Q92878	RAD50	Isoform 2 of DNA repair protein RAD50	1.99357e+07	1.10247e+07	1.54802e+07	5.81549e-05	9.59201e-05	7.70375e-05	1.88826e-05	1540
Q9NV31	Q9NV31	IMP3	U3 small nucleolar ribonucleoprotein protein IMP3	2.9907e+07	7.67964e+06	1.87933e+07	8.72423e-05	6.68163e-05	7.70293e-05	1.0213e-05	1541
P53992	P53992	SEC24C	Protein transport protein Sec24C	2.3004e+07	9.98094e+06	1.64925e+07	6.71055e-05	8.68386e-05	7.6972e-05	9.86658e-06	1542
Q10713	Q10713	PMPCA	Mitochondrial-processing peptidase subunit alpha	2.99741e+07	7.61759e+06	1.87958e+07	8.74379e-05	6.62764e-05	7.68572e-05	1.05807e-05	1543
Q99747	Q99747	NAPG	Gamma-soluble NSF attachment protein	2.69438e+07	8.62352e+06	1.77837e+07	7.85983e-05	7.50284e-05	7.68133e-05	1.78492e-06	1544
Q9HCC0	Q9HCC0	MCCC2	Methylcrotonoyl-CoA carboxylase beta chain, mitochondrial	2.04558e+07	1.07846e+07	1.56202e+07	5.9672e-05	9.38307e-05	7.67514e-05	1.70793e-05	1545
Q9UBQ7	Q9UBQ7	GRHPR	Glyoxylate reductase/hydroxypyruvate reductase	2.62113e+07	8.81532e+06	1.75133e+07	7.64613e-05	7.66972e-05	7.65793e-05	1.17916e-07	1546
Q96FQ6	Q96FQ6	S100A16	Protein S100-A16	1.7286e+07	1.18044e+07	1.45452e+07	5.04254e-05	0.000102704	7.65645e-05	2.61391e-05	1547
O95864	O95864	FADS2	Fatty acid desaturase 2	1.96364e+07	1.10089e+07	1.53227e+07	5.72818e-05	9.57824e-05	7.65321e-05	1.92503e-05	1548
Q96QK1	Q96QK1	VPS35	Vacuolar protein sorting-associated protein 35	2.24989e+07	1.00428e+07	1.62708e+07	6.56319e-05	8.73764e-05	7.65042e-05	1.08723e-05	1549
P47897	P47897	QARS	Glutamine--tRNA ligase	2.95538e+07	7.64043e+06	1.85971e+07	8.62121e-05	6.64752e-05	7.63436e-05	9.86845e-06	1550
O14929	O14929	HAT1	Histone acetyltransferase type B catalytic subunit	3.21605e+07	6.73687e+06	1.94487e+07	9.3816e-05	5.86137e-05	7.62149e-05	1.76011e-05	1551
P78347	P78347	GTF2I	General transcription factor II-I	2.29068e+07	9.83641e+06	1.63716e+07	6.68219e-05	8.55811e-05	7.62015e-05	9.37961e-06	1552
O94906	O94906	PRPF6	Pre-mRNA-processing factor 6	2.48461e+07	9.15922e+06	1.70027e+07	7.24791e-05	7.96893e-05	7.60842e-05	3.6051e-06	1553
P61020	P61020	RAB5B	Ras-related protein Rab-5B	9.38406e+06	1.43395e+07	1.18618e+07	2.73744e-05	0.00012476	7.6067e-05	4.86926e-05	1554
Q8WTT2	Q8WTT2	NOC3L	Nucleolar complex protein 3 homolog	3.73241e+07	4.95222e+06	2.11382e+07	0.000108879	4.30865e-05	7.59827e-05	3.28962e-05	1555
Q12996	Q12996	CSTF3	Cleavage stimulation factor subunit 3	2.80973e+07	8.04146e+06	1.80694e+07	8.1963e-05	6.99643e-05	7.59637e-05	5.99937e-06	1556
Q96JB5-4	Q96JB5	CDK5RAP3	Isoform 4 of CDK5 regulatory subunit-associated protein 3	2.34735e+07	9.57042e+06	1.6522e+07	6.84749e-05	8.32669e-05	7.58709e-05	7.39597e-06	1557
Q7Z4V5-3	Q7Z4V5	HDGFRP2	Isoform 3 of Hepatoma-derived growth factor-related protein 2	2.73148e+07	8.25853e+06	1.77866e+07	7.96804e-05	7.18528e-05	7.57666e-05	3.91379e-06	1558
Q9UHB9	Q9UHB9	SRP68	Signal recognition particle subunit SRP68	3.02607e+07	7.21773e+06	1.87392e+07	8.82741e-05	6.27974e-05	7.55358e-05	1.27384e-05	1559
O14562	O14562	UBFD1	Ubiquitin domain-containing protein UBFD1	2.77748e+07	8.04997e+06	1.79124e+07	8.10224e-05	7.00383e-05	7.55304e-05	5.49205e-06	1560
O95159	O95159	ZFPL1	Zinc finger protein-like 1	1.75273e+07	1.14828e+07	1.45051e+07	5.11293e-05	9.99058e-05	7.55176e-05	2.43883e-05	1561
O14744	O14744	PRMT5	Protein arginine N-methyltransferase 5	2.87741e+07	7.66278e+06	1.82185e+07	8.39375e-05	6.66696e-05	7.53036e-05	8.63395e-06	1562
Q9BYG3	Q9BYG3	NIFK	MKI67 FHA domain-interacting nucleolar phosphoprotein	3.13735e+07	6.78926e+06	1.90814e+07	9.15203e-05	5.90696e-05	7.5295e-05	1.62254e-05	1563
O43504	O43504	LAMTOR5	Ragulator complex protein LAMTOR5	2.01247e+07	1.05604e+07	1.53425e+07	5.87061e-05	9.18798e-05	7.5293e-05	1.65869e-05	1564
Q5UCC4	Q5UCC4	EMC10	ER membrane protein complex subunit 10	2.79943e+07	7.9007e+06	1.79475e+07	8.16627e-05	6.87396e-05	7.52011e-05	6.46153e-06	1565
P42025	P42025	ACTR1B	Beta-centractin	2.57099e+07	8.63962e+06	1.71748e+07	7.49988e-05	7.51686e-05	7.50837e-05	8.4884e-08	1566
P61221	P61221	ABCE1	ATP-binding cassette sub-family E member 1	2.21036e+07	9.84723e+06	1.59754e+07	6.44787e-05	8.56752e-05	7.5077e-05	1.05983e-05	1567
P27487	P27487	DPP4	Dipeptidyl peptidase 4	3.42391e+07	5.73566e+06	1.99874e+07	9.98796e-05	4.99028e-05	7.48912e-05	2.49884e-05	1568
Q9UI14	Q9UI14	RABAC1	Prenylated Rab acceptor protein 1	4.11394e+06	1.57654e+07	9.93967e+06	1.20008e-05	0.000137166	7.45834e-05	6.25826e-05	1569
Q9Y2R9	Q9Y2R9	MRPS7	28S ribosomal protein S7, mitochondrial	2.50126e+07	8.74e+06	1.68763e+07	7.29646e-05	7.60419e-05	7.45032e-05	1.53862e-06	1570
Q9BUQ8	Q9BUQ8	DDX23	Probable ATP-dependent RNA helicase DDX23	2.38824e+07	9.11848e+06	1.65005e+07	6.96679e-05	7.93348e-05	7.45014e-05	4.83343e-06	1571
Q8IXB1	Q8IXB1	DNAJC10	DnaJ homolog subfamily C member 10	1.69083e+07	1.145e+07	1.41792e+07	4.93235e-05	9.96204e-05	7.4472e-05	2.51484e-05	1572
Q9HCD5	Q9HCD5	NCOA5	Nuclear receptor coactivator 5	1.83241e+07	1.09597e+07	1.46419e+07	5.34535e-05	9.53539e-05	7.44037e-05	2.09502e-05	1573
Q9Y2G5	Q9Y2G5	POFUT2	GDP-fucose protein O-fucosyltransferase 2	2.80254e+07	7.67115e+06	1.78483e+07	8.17535e-05	6.67424e-05	7.4248e-05	7.50553e-06	1574
Q9NX70	Q9NX70	MED29	Mediator of RNA polymerase II transcription subunit 29	4.21282e+07	2.94075e+06	2.25345e+07	0.000122893	2.55858e-05	7.42393e-05	4.86535e-05	1575
O95218	O95218	ZRANB2	Zinc finger Ran-binding domain-containing protein 2	3.58185e+07	5.03409e+06	2.04263e+07	0.000104487	4.37988e-05	7.41428e-05	3.0344e-05	1576
P11586	P11586	MTHFD1	C-1-tetrahydrofolate synthase, cytoplasmic	2.92288e+07	7.24227e+06	1.82355e+07	8.52639e-05	6.3011e-05	7.41374e-05	1.11265e-05	1577
P55265-4	P55265	ADAR	Isoform 4 of Double-stranded RNA-specific adenosine deaminase	2.78081e+07	7.70755e+06	1.77578e+07	8.11195e-05	6.70591e-05	7.40893e-05	7.0302e-06	1578
P35244	P35244	RPA3	Replication protein A 14 kDa subunit	2.67081e+07	8.07175e+06	1.73899e+07	7.79107e-05	7.02278e-05	7.40692e-05	3.84146e-06	1579
Q6WCQ1-2	Q6WCQ1	MPRIP	Isoform 2 of Myosin phosphatase Rho-interacting protein	1.90231e+07	1.06089e+07	1.4816e+07	5.54926e-05	9.23017e-05	7.38972e-05	1.84046e-05	1580
P57678	P57678	GEMIN4	Gem-associated protein 4	1.56333e+07	1.17411e+07	1.36872e+07	4.56041e-05	0.000102153	7.38785e-05	2.82745e-05	1581
P52569-3	P52569	SLC7A2	Isoform 3 of Cationic amino acid transporter 2	586934	1.67696e+07	8.67826e+06	1.71216e-06	0.000145903	7.38075e-05	7.20954e-05	1582
Q8N766	Q8N766	EMC1	ER membrane protein complex subunit 1	2.02319e+07	1.01674e+07	1.51996e+07	5.90187e-05	8.84608e-05	7.37398e-05	1.47211e-05	1583
O43567	O43567	RNF13	E3 ubiquitin-protein ligase RNF13	7.16316e+06	1.4541e+07	1.08521e+07	2.08958e-05	0.000126513	7.37046e-05	5.28088e-05	1584
Q9NX58	Q9NX58	LYAR	Cell growth-regulating nucleolar protein	2.69759e+07	7.89241e+06	1.74341e+07	7.86918e-05	6.86675e-05	7.36796e-05	5.01214e-06	1585
P56545-2	P56545	CTBP2	Isoform 2 of C-terminal-binding protein 2	3.16764e+07	6.31286e+06	1.89946e+07	9.24038e-05	5.49247e-05	7.36642e-05	1.87395e-05	1586
Q12972	Q12972	PPP1R8	Nuclear inhibitor of protein phosphatase 1	2.12461e+07	9.78422e+06	1.55152e+07	6.19774e-05	8.5127e-05	7.35522e-05	1.15748e-05	1587
Q9P0I2	Q9P0I2	EMC3	ER membrane protein complex subunit 3	1.96021e+07	1.03337e+07	1.49679e+07	5.71817e-05	8.99076e-05	7.35447e-05	1.6363e-05	1588
Q15434	Q15434	RBMS2	RNA-binding motif, single-stranded-interacting protein 2	2.77913e+07	7.55038e+06	1.76708e+07	8.10705e-05	6.56916e-05	7.33811e-05	7.68944e-06	1589
Q9NWH9	Q9NWH9	SLTM	SAFB-like transcription modulator	2.45666e+07	8.62042e+06	1.65935e+07	7.16638e-05	7.50015e-05	7.33326e-05	1.66885e-06	1590
P09488	P09488	GSTM1	Glutathione S-transferase Mu 1	3.85587e+07	3.91822e+06	2.12384e+07	0.00011248	3.40902e-05	7.32852e-05	3.9195e-05	1591
Q5T653	Q5T653	MRPL2	39S ribosomal protein L2, mitochondrial	3.00188e+07	6.77206e+06	1.83954e+07	8.75684e-05	5.89199e-05	7.32442e-05	1.43243e-05	1592
P11498	P11498	PC	Pyruvate carboxylase, mitochondrial	1.25874e+07	1.25892e+07	1.25883e+07	3.6719e-05	0.000109532	7.31255e-05	3.64065e-05	1593
Q01813	Q01813	PFKP	ATP-dependent 6-phosphofructokinase, platelet type	1.87271e+07	1.04861e+07	1.46066e+07	5.46292e-05	9.1234e-05	7.29316e-05	1.83024e-05	1594
Q9Y2W2	Q9Y2W2	WBP11	WW domain-binding protein 11	2.64557e+07	7.89287e+06	1.71743e+07	7.71743e-05	6.86715e-05	7.29229e-05	4.25143e-06	1595
Q8WUD4	Q8WUD4	CCDC12	Coiled-coil domain-containing protein 12	1.95399e+07	1.0205e+07	1.48725e+07	5.70002e-05	8.87884e-05	7.28943e-05	1.58941e-05	1596
P07951	P07951	TPM2	Tropomyosin beta chain	9.13841e+06	1.36694e+07	1.14039e+07	2.66578e-05	0.00011893	7.27938e-05	4.61359e-05	1597
Q9NZ63	Q9NZ63	C9orf78	Uncharacterized protein C9orf78	4.66707e+07	1.08529e+06	2.3878e+07	0.000136144	9.4425e-06	7.27933e-05	6.33508e-05	1598
Q15392	Q15392	DHCR24	Delta(24)-sterol reductase	1.53841e+07	1.15596e+07	1.34718e+07	4.48772e-05	0.000100573	7.27253e-05	2.78481e-05	1599
P29373	P29373	CRABP2	Cellular retinoic acid-binding protein 2	2.32209e+07	8.89471e+06	1.60578e+07	6.77382e-05	7.73879e-05	7.25631e-05	4.82484e-06	1600
Q9UG63-2	Q9UG63	ABCF2	Isoform 2 of ATP-binding cassette sub-family F member 2	2.36932e+07	8.71348e+06	1.62033e+07	6.91158e-05	7.58112e-05	7.24635e-05	3.34768e-06	1601
P19022	P19022	CDH2	Cadherin-2	1.87266e+07	1.0378e+07	1.45523e+07	5.46276e-05	9.02933e-05	7.24605e-05	1.78328e-05	1602
Q9H1K1	Q9H1K1	ISCU	Iron-sulfur cluster assembly enzyme ISCU, mitochondrial	3.02786e+07	6.48177e+06	1.83802e+07	8.83263e-05	5.63943e-05	7.23603e-05	1.5966e-05	1603
Q96I25	Q96I25	RBM17	Splicing factor 45	2.12538e+07	9.4971e+06	1.53754e+07	6.19997e-05	8.2629e-05	7.23143e-05	1.03146e-05	1604
Q9NX20	Q9NX20	MRPL16	39S ribosomal protein L16, mitochondrial	2.71244e+07	7.51242e+06	1.73184e+07	7.91249e-05	6.53614e-05	7.22432e-05	6.8818e-06	1605
P61758	P61758	VBP1	Prefoldin subunit 3	3.07154e+07	6.306e+06	1.85107e+07	8.96005e-05	5.4865e-05	7.22328e-05	1.73678e-05	1606
Q6P2I3	Q6P2I3	FAHD2B	Fumarylacetoacetate hydrolase domain-containing protein 2B	2.9568e+07	6.66591e+06	1.8117e+07	8.62534e-05	5.79964e-05	7.21249e-05	1.41285e-05	1607
Q9H845	Q9H845	ACAD9	Acyl-CoA dehydrogenase family member 9, mitochondrial	2.38406e+07	8.56871e+06	1.62046e+07	6.95458e-05	7.45516e-05	7.20487e-05	2.5029e-06	1608
Q7Z7K0	Q7Z7K0	CMC1	COX assembly mitochondrial protein homolog	3.71509e+07	4.10591e+06	2.06284e+07	0.000108374	3.57232e-05	7.20484e-05	3.63251e-05	1609
O14907	O14907	TAX1BP3	Tax1-binding protein 3	2.91602e+07	6.76417e+06	1.79622e+07	8.50636e-05	5.88513e-05	7.19575e-05	1.31062e-05	1610
P02511	P02511	CRYAB	Alpha-crystallin B chain	1.32578e+07	1.20894e+07	1.26736e+07	3.86745e-05	0.000105183	7.1929e-05	3.32545e-05	1611
Q9Y3D3	Q9Y3D3	MRPS16	28S ribosomal protein S16, mitochondrial	1.98019e+07	9.85467e+06	1.48283e+07	5.77646e-05	8.574e-05	7.17523e-05	1.39877e-05	1612
Q8N357	Q8N357	SLC35F6	Solute carrier family 35 member F6	1.30873e+07	1.20949e+07	1.25911e+07	3.81772e-05	0.000105231	7.17042e-05	3.3527e-05	1613
P56192	P56192	MARS	Methionine--tRNA ligase, cytoplasmic	2.70056e+07	7.41284e+06	1.72092e+07	7.87786e-05	6.4495e-05	7.16368e-05	7.14178e-06	1614
O75436	O75436	VPS26A	Vacuolar protein sorting-associated protein 26A	2.0995e+07	9.42615e+06	1.52106e+07	6.12449e-05	8.20117e-05	7.16283e-05	1.03834e-05	1615
Q9UBG0	Q9UBG0	MRC2	C-type mannose receptor 2	1.91842e+07	1.00222e+07	1.46032e+07	5.59625e-05	8.71977e-05	7.15801e-05	1.56176e-05	1616
Q9P0K7-2	Q9P0K7	RAI14	Isoform 2 of Ankycorbin	2.33009e+07	8.63171e+06	1.59663e+07	6.79714e-05	7.50997e-05	7.15355e-05	3.56414e-06	1617
Q9H0N5	Q9H0N5	PCBD2	Pterin-4-alpha-carbinolamine dehydratase 2	2.28299e+06	1.56742e+07	8.97862e+06	6.65976e-06	0.000136373	7.15163e-05	6.48566e-05	1618
Q8N983-4	Q8N983	MRPL43	Isoform 4 of 39S ribosomal protein L43, mitochondrial	2.23292e+07	8.94254e+06	1.56359e+07	6.5137e-05	7.7804e-05	7.14705e-05	6.33351e-06	1619
Q99653	Q99653	CHP1	Calcineurin B homologous protein 1	2.10254e+07	9.3687e+06	1.5197e+07	6.13335e-05	8.15118e-05	7.14226e-05	1.00892e-05	1620
P01112	P01112	HRAS	GTPase HRas	1.59608e+07	1.10598e+07	1.35103e+07	4.65596e-05	9.62254e-05	7.13925e-05	2.48329e-05	1621
O15235	O15235	MRPS12	28S ribosomal protein S12, mitochondrial	2.46313e+07	8.12779e+06	1.63795e+07	7.18524e-05	7.07154e-05	7.12839e-05	5.68531e-07	1622
P60983	P60983	GMFB	Glia maturation factor beta	3.0169e+07	6.2334e+06	1.82012e+07	8.80067e-05	5.42334e-05	7.112e-05	1.68867e-05	1623
Q9NXG2	Q9NXG2	THUMPD1	THUMP domain-containing protein 1	3.00604e+07	6.26835e+06	1.81644e+07	8.76899e-05	5.45374e-05	7.11137e-05	1.65762e-05	1624
P50570	P50570	DNM2	Dynamin-2	2.04014e+07	9.50199e+06	1.49517e+07	5.95133e-05	8.26716e-05	7.10924e-05	1.15791e-05	1625
Q8NFW8	Q8NFW8	CMAS	N-acylneuraminate cytidylyltransferase	2.21312e+07	8.90872e+06	1.552e+07	6.45594e-05	7.75098e-05	7.10346e-05	6.47519e-06	1626
P51532	P51532	SMARCA4	Transcription activator BRG1	3.18414e+07	5.62697e+06	1.87342e+07	9.28852e-05	4.89571e-05	7.09211e-05	2.1964e-05	1627
Q8N8S7	Q8N8S7	ENAH	Protein enabled homolog	2.16004e+07	9.01733e+06	1.53089e+07	6.30109e-05	7.84548e-05	7.07329e-05	7.72194e-06	1628
P15151	P15151	PVR	Poliovirus receptor	2.54808e+07	7.71595e+06	1.65984e+07	7.43304e-05	6.71322e-05	7.07313e-05	3.5991e-06	1629
Q9HCU5	Q9HCU5	PREB	Prolactin regulatory element-binding protein	2.41933e+07	8.12827e+06	1.61608e+07	7.05747e-05	7.07196e-05	7.06471e-05	7.24387e-08	1630
P29590	P29590	PML	Protein PML	2.14521e+07	9.03354e+06	1.52428e+07	6.25784e-05	7.85958e-05	7.05871e-05	8.00867e-06	1631
Q6UXH1-5	Q6UXH1	CRELD2	Isoform 5 of Cysteine-rich with EGF-like domain protein 2	3.0514e+07	5.98985e+06	1.82519e+07	8.90128e-05	5.21143e-05	7.05636e-05	1.84492e-05	1632
Q8WUH6	Q8WUH6	TMEM263	Transmembrane protein 263	1.93114e+07	9.71383e+06	1.45126e+07	5.63337e-05	8.45146e-05	7.04242e-05	1.40905e-05	1633
Q9BQE9	Q9BQE9	BCL7B	B-cell CLL/lymphoma 7 protein family member B	4.1965e+07	2.10978e+06	2.20374e+07	0.000122417	1.8356e-05	7.03864e-05	5.20304e-05	1634
P61966	P61966	AP1S1	AP-1 complex subunit sigma-1A	2.54343e+07	7.64428e+06	1.65393e+07	7.41949e-05	6.65086e-05	7.03517e-05	3.84313e-06	1635
Q3MHD2-2	Q3MHD2	LSM12	Isoform 2 of Protein LSM12 homolog	1.27184e+07	1.18998e+07	1.23091e+07	3.7101e-05	0.000103534	7.03174e-05	3.32164e-05	1636
Q13901	Q13901	C1D	Nuclear nucleic acid-binding protein C1D	1.17783e+07	1.22067e+07	1.19925e+07	3.43586e-05	0.000106204	7.02811e-05	3.59225e-05	1637
P43121	P43121	MCAM	Cell surface glycoprotein MUC18	1.75056e+07	1.02603e+07	1.3883e+07	5.10658e-05	8.92694e-05	7.01676e-05	1.91018e-05	1638
P21283	P21283	ATP6V1C1	V-type proton ATPase subunit C 1	2.94353e+07	6.25051e+06	1.78429e+07	8.58662e-05	5.43822e-05	7.01242e-05	1.5742e-05	1639
P11117	P11117	ACP2	Lysosomal acid phosphatase	1.97468e+07	9.47895e+06	1.46129e+07	5.76039e-05	8.2471e-05	7.00375e-05	1.24336e-05	1640
Q9Y2Q9	Q9Y2Q9	MRPS28	28S ribosomal protein S28, mitochondrial	2.40858e+07	7.99731e+06	1.60416e+07	7.02613e-05	6.95801e-05	6.99207e-05	3.40573e-07	1641
Q9Y6M9	Q9Y6M9	NDUFB9	NADH dehydrogenase [ubiquinone] 1 beta subcomplex subunit 9	1.04551e+07	1.25371e+07	1.14961e+07	3.04987e-05	0.000109078	6.97884e-05	3.92898e-05	1642
Q15437	Q15437	SEC23B	Protein transport protein Sec23B	2.62266e+07	7.24515e+06	1.67359e+07	7.65062e-05	6.3036e-05	6.97711e-05	6.7351e-06	1643
O75874	O75874	IDH1	Isocitrate dehydrogenase [NADP] cytoplasmic	2.39058e+07	8.02288e+06	1.59643e+07	6.9736e-05	6.98027e-05	6.97694e-05	3.33022e-08	1644
O95232	O95232	LUC7L3	Luc7-like protein 3	2.3179e+07	8.23378e+06	1.57064e+07	6.7616e-05	7.16375e-05	6.96268e-05	2.01077e-06	1645
Q4VC31	Q4VC31	CCDC58	Coiled-coil domain-containing protein 58	1.93968e+07	9.47234e+06	1.44346e+07	5.65828e-05	8.24136e-05	6.94982e-05	1.29154e-05	1646
Q6DKK2	Q6DKK2	TTC19	Tetratricopeptide repeat protein 19, mitochondrial	4.24048e+07	1.7509e+06	2.20779e+07	0.0001237	1.52336e-05	6.94667e-05	5.42331e-05	1647
Q13451	Q13451	FKBP5	Peptidyl-prolyl cis-trans isomerase FKBP5	3.15293e+07	5.39158e+06	1.84604e+07	9.19747e-05	4.69092e-05	6.94419e-05	2.25328e-05	1648
Q9ULX6	Q9ULX6	AKAP8L	A-kinase anchor protein 8-like	3.33634e+07	4.77084e+06	1.90671e+07	9.73249e-05	4.15084e-05	6.94167e-05	2.79083e-05	1649
Q9BU23	Q9BU23	LMF2	Lipase maturation factor 2	1.01529e+07	1.2552e+07	1.13524e+07	2.96173e-05	0.000109208	6.94125e-05	3.97952e-05	1650
O75880	O75880	SCO1	Protein SCO1 homolog, mitochondrial	3.52028e+07	4.1368e+06	1.96698e+07	0.000102691	3.5992e-05	6.93413e-05	3.33493e-05	1651
P50281	P50281	MMP14	Matrix metalloproteinase-14	2.51426e+07	7.50795e+06	1.63253e+07	7.33438e-05	6.53225e-05	6.93332e-05	4.01065e-06	1652
Q14344	Q14344	GNA13	Guanine nucleotide-binding protein subunit alpha-13	1.95768e+07	9.37105e+06	1.44739e+07	5.71078e-05	8.15323e-05	6.932e-05	1.22123e-05	1653
Q6P1L8	Q6P1L8	MRPL14	39S ribosomal protein L14, mitochondrial	2.40376e+07	7.86966e+06	1.59536e+07	7.01205e-05	6.84695e-05	6.9295e-05	8.25518e-07	1654
P23381	P23381	WARS	Tryptophan--tRNA ligase, cytoplasmic	2.42391e+07	7.79286e+06	1.6016e+07	7.07082e-05	6.78014e-05	6.92548e-05	1.45343e-06	1655
Q9UMS6-2	Q9UMS6	SYNPO2	Isoform 2 of Synaptopodin-2	1.01722e+07	1.25004e+07	1.13363e+07	2.96736e-05	0.000108759	6.92162e-05	3.95425e-05	1656
P38432	P38432	COIL	Coilin	1.11147e+07	1.21824e+07	1.16485e+07	3.2423e-05	0.000105992	6.92075e-05	3.67844e-05	1657
P62873	P62873	GNB1	Guanine nucleotide-binding protein G(I)/G(S)/G(T) subunit beta-1	2.75642e+07	6.62789e+06	1.7096e+07	8.0408e-05	5.76656e-05	6.90368e-05	1.13712e-05	1658
Q13555-6	Q13555	CAMK2G	Isoform 6 of Calcium/calmodulin-dependent protein kinase type II subunit gamma	1.94709e+07	9.32912e+06	1.44e+07	5.67989e-05	8.11675e-05	6.89832e-05	1.21843e-05	1659
Q9H0U6	Q9H0U6	MRPL18	39S ribosomal protein L18, mitochondrial	3.20816e+07	5.09327e+06	1.85874e+07	9.35858e-05	4.43137e-05	6.89497e-05	2.4636e-05	1660
O75475	O75475	PSIP1	PC4 and SFRS1-interacting protein	2.86688e+07	6.22102e+06	1.74449e+07	8.36302e-05	5.41256e-05	6.88779e-05	1.47523e-05	1661
P08397	P08397	HMBS	Porphobilinogen deaminase	2.36001e+07		2.36001e+07	6.88444e-05		6.88444e-05		1662
P46821	P46821	MAP1B	Microtubule-associated protein 1B	1.85805e+07	9.58681e+06	1.40837e+07	5.42015e-05	8.34095e-05	6.88055e-05	1.4604e-05	1663
Q96QD9	Q96QD9	FYTTD1	UAP56-interacting factor	2.52482e+07	7.34157e+06	1.62949e+07	7.36521e-05	6.38749e-05	6.87635e-05	4.8886e-06	1664
Q9H3K6	Q9H3K6	BOLA2	BolA-like protein 2	1.99233e+07	9.11416e+06	1.45187e+07	5.81185e-05	7.92973e-05	6.87079e-05	1.05894e-05	1665
Q9NR31	Q9NR31	SAR1A	GTP-binding protein SAR1a	1.86441e+07	9.48296e+06	1.40635e+07	5.4387e-05	8.25059e-05	6.84465e-05	1.40595e-05	1666
P37268	P37268	FDFT1	Squalene synthase	1.81274e+07	9.65438e+06	1.38909e+07	5.28799e-05	8.39974e-05	6.84386e-05	1.55587e-05	1667
Q13045	Q13045	FLII	Protein flightless-1 homolog	3.00501e+07	5.63018e+06	1.78401e+07	8.76597e-05	4.89851e-05	6.83224e-05	1.93373e-05	1668
Q13098-7	Q13098	GPS1	Isoform 2 of COP9 signalosome complex subunit 1	2.20689e+07	8.29597e+06	1.51824e+07	6.43775e-05	7.21787e-05	6.82781e-05	3.90059e-06	1669
O14828	O14828	SCAMP3	Secretory carrier-associated membrane protein 3	2.3571e+07	7.75411e+06	1.56625e+07	6.87593e-05	6.74642e-05	6.81118e-05	6.4752e-07	1670
P28370	P28370	SMARCA1	Probable global transcription activator SNF2L1	1.88245e+07	9.34292e+06	1.40837e+07	5.49133e-05	8.12875e-05	6.81004e-05	1.31871e-05	1671
P82673	P82673	MRPS35	28S ribosomal protein S35, mitochondrial	3.74742e+07	3.08066e+06	2.02775e+07	0.000109317	2.68031e-05	6.806e-05	4.12569e-05	1672
Q13438	Q13438	OS9	Protein OS-9	1.14881e+07	1.17909e+07	1.16395e+07	3.35121e-05	0.000102586	6.80492e-05	3.45371e-05	1673
Q16795	Q16795	NDUFA9	NADH dehydrogenase [ubiquinone] 1 alpha subcomplex subunit 9, mitochondrial	2.47697e+07	7.29814e+06	1.60339e+07	7.22563e-05	6.34971e-05	6.78767e-05	4.3796e-06	1674
P49792	P49792	RANBP2	E3 SUMO-protein ligase RanBP2	2.53213e+07	7.09831e+06	1.62098e+07	7.38652e-05	6.17584e-05	6.78118e-05	6.05339e-06	1675
P60602	P60602	ROMO1	Reactive oxygen species modulator 1	2.38203e+07	7.59974e+06	1.571e+07	6.94867e-05	6.61212e-05	6.78039e-05	1.68276e-06	1676
O00541	O00541	PES1	Pescadillo homolog	1.61797e+07	1.01464e+07	1.3163e+07	4.7198e-05	8.82784e-05	6.77382e-05	2.05402e-05	1677
P07711	P07711	CTSL	Cathepsin L1	3.14246e+07	5.03484e+06	1.82297e+07	9.16692e-05	4.38053e-05	6.77372e-05	2.39319e-05	1678
P00491	P00491	PNP	Purine nucleoside phosphorylase	3.38477e+07	4.20924e+06	1.90285e+07	9.87378e-05	3.66223e-05	6.76801e-05	3.10578e-05	1679
Q00403	Q00403	GTF2B	Transcription initiation factor IIB	1.53693e+07	1.03778e+07	1.28735e+07	4.4834e-05	9.02911e-05	6.75626e-05	2.27286e-05	1680
Q6NUM9	Q6NUM9	RETSAT	All-trans-retinol 13,14-reductase	2.41653e+07	7.40759e+06	1.57864e+07	7.0493e-05	6.44493e-05	6.74711e-05	3.02182e-06	1681
O00186	O00186	STXBP3	Syntaxin-binding protein 3	2.50864e+07	7.08512e+06	1.60858e+07	7.318e-05	6.16437e-05	6.74119e-05	5.76813e-06	1682
Q9Y680	Q9Y680	FKBP7	Peptidyl-prolyl cis-trans isomerase FKBP7	2.32284e+07	7.70594e+06	1.54672e+07	6.776e-05	6.70451e-05	6.74026e-05	3.57481e-07	1683
O60264	O60264	SMARCA5	SWI/SNF-related matrix-associated actin-dependent regulator of chromatin subfamily A member 5	2.6147e+07	6.71567e+06	1.64313e+07	7.62738e-05	5.84293e-05	6.73515e-05	8.92221e-06	1684
O43290	O43290	SART1	U4/U6.U5 tri-snRNP-associated protein 1	2.15603e+07	8.22777e+06	1.48941e+07	6.28941e-05	7.15853e-05	6.72397e-05	4.3456e-06	1685
O00330	O00330	PDHX	Pyruvate dehydrogenase protein X component, mitochondrial	2.48811e+07	7.11098e+06	1.5996e+07	7.25811e-05	6.18687e-05	6.72249e-05	5.35621e-06	1686
Q9Y3D6	Q9Y3D6	FIS1	Mitochondrial fission 1 protein	1.61149e+07	1.00165e+07	1.30657e+07	4.70091e-05	8.71479e-05	6.70785e-05	2.00694e-05	1687
Q99757	Q99757	TXN2	Thioredoxin, mitochondrial	9.26807e+06	1.23077e+07	1.07879e+07	2.70361e-05	0.000107082	6.70592e-05	4.00231e-05	1688
Q8N684-3	Q8N684	CPSF7	Isoform 3 of Cleavage and polyadenylation specificity factor subunit 7	1.58118e+07	1.00992e+07	1.29555e+07	4.6125e-05	8.78674e-05	6.69962e-05	2.08712e-05	1689
Q9H936	Q9H936	SLC25A22	Mitochondrial glutamate carrier 1	1.96916e+07	8.7949e+06	1.42433e+07	5.74428e-05	7.65195e-05	6.69811e-05	9.53837e-06	1690
P60002	P60002	ELOF1	Transcription elongation factor 1 homolog	2.04633e+07	8.52515e+06	1.44942e+07	5.96938e-05	7.41726e-05	6.69332e-05	7.23938e-06	1691
Q969Z0	Q969Z0	TBRG4	Protein TBRG4	1.65879e+07	9.81639e+06	1.32022e+07	4.8389e-05	8.54069e-05	6.68979e-05	1.8509e-05	1692
P49406	P49406	MRPL19	39S ribosomal protein L19, mitochondrial	1.867e+07	9.0966e+06	1.38833e+07	5.44625e-05	7.91445e-05	6.68035e-05	1.2341e-05	1693
Q6NYC8	Q6NYC8	PPP1R18	Phostensin	2.17506e+07	8.05616e+06	1.49034e+07	6.34492e-05	7.00922e-05	6.67707e-05	3.32149e-06	1694
Q8N4V1-2	Q8N4V1	MMGT1	Isoform 2 of Membrane magnesium transporter 1	2.9862e+07	5.32109e+06	1.75915e+07	8.7111e-05	4.62958e-05	6.67034e-05	2.04076e-05	1695
Q13601	Q13601	KRR1	KRR1 small subunit processome component homolog	2.73142e+07	6.17443e+06	1.67443e+07	7.96789e-05	5.37203e-05	6.66996e-05	1.29793e-05	1696
Q8WVK2	Q8WVK2	SNRNP27	U4/U6.U5 small nuclear ribonucleoprotein 27 kDa protein	3.16964e+07	4.66782e+06	1.81821e+07	9.24621e-05	4.06121e-05	6.65371e-05	2.5925e-05	1697
P10109	P10109	FDX1	Adrenodoxin, mitochondrial	2.23124e+07	7.81279e+06	1.50626e+07	6.5088e-05	6.79748e-05	6.65314e-05	1.44338e-06	1698
Q9Y639	Q9Y639	NPTN	Neuroplastin	2.44636e+07	7.08814e+06	1.57759e+07	7.13632e-05	6.167e-05	6.65166e-05	4.84662e-06	1699
P54577	P54577	YARS	Tyrosine--tRNA ligase, cytoplasmic	1.90647e+07	8.89243e+06	1.39786e+07	5.56139e-05	7.73681e-05	6.6491e-05	1.08771e-05	1700
Q9UNF1	Q9UNF1	MAGED2	Melanoma-associated antigen D2	3.02467e+07	5.14321e+06	1.7695e+07	8.82333e-05	4.47482e-05	6.64908e-05	2.17426e-05	1701
Q16270	Q16270	IGFBP7	Insulin-like growth factor-binding protein 7	1.14996e+07	1.14011e+07	1.14504e+07	3.35457e-05	9.9195e-05	6.63703e-05	3.28247e-05	1702
Q9Y3E1	Q9Y3E1	HDGFRP3	Hepatoma-derived growth factor-related protein 3	2.43952e+07	7.07106e+06	1.57332e+07	7.11638e-05	6.15214e-05	6.63426e-05	4.82122e-06	1703
Q9HBM0	Q9HBM0	VEZT	Vezatin	4.4567e+07	286808	2.24269e+07	0.000130007	2.49536e-06	6.62513e-05	6.37559e-05	1704
O15042	O15042	U2SURP	U2 snRNP-associated SURP motif-containing protein	2.01317e+07	8.47327e+06	1.43025e+07	5.87266e-05	7.37213e-05	6.62239e-05	7.49734e-06	1705
Q9BYD3	Q9BYD3	MRPL4	39S ribosomal protein L4, mitochondrial	2.68267e+07	6.22455e+06	1.65256e+07	7.82568e-05	5.41563e-05	6.62066e-05	1.20502e-05	1706
Q7Z4H8	Q7Z4H8	KDELC2	KDEL motif-containing protein 2	2.31514e+07	7.4506e+06	1.5301e+07	6.75355e-05	6.48235e-05	6.61795e-05	1.35596e-06	1707
Q9P013	Q9P013	CWC15	Spliceosome-associated protein CWC15 homolog	4.20757e+07	1.10455e+06	2.15901e+07	0.00012274	9.61004e-06	6.6175e-05	5.65649e-05	1708
Q99986	Q99986	VRK1	Serine/threonine-protein kinase VRK1	2.94997e+07	5.30577e+06	1.74027e+07	8.60541e-05	4.61625e-05	6.61083e-05	1.99458e-05	1709
P51553	P51553	IDH3G	Isocitrate dehydrogenase [NAD] subunit gamma, mitochondrial	2.71736e+07	6.08077e+06	1.66272e+07	7.92687e-05	5.29054e-05	6.60871e-05	1.31817e-05	1710
O75175	O75175	CNOT3	CCR4-NOT transcription complex subunit 3	2.09111e+07	8.17149e+06	1.45413e+07	6.10002e-05	7.10956e-05	6.60479e-05	5.04773e-06	1711
P82675	P82675	MRPS5	28S ribosomal protein S5, mitochondrial	2.32421e+07	7.38755e+06	1.53148e+07	6.77999e-05	6.42749e-05	6.60374e-05	1.76247e-06	1712
O15427	O15427	SLC16A3	Monocarboxylate transporter 4	1.72277e+07	9.40349e+06	1.33156e+07	5.02553e-05	8.18145e-05	6.60349e-05	1.57796e-05	1713
P61218	P61218	POLR2F	DNA-directed RNA polymerases I, II, and III subunit RPABC2	2.26354e+07		2.26354e+07	6.60303e-05		6.60303e-05		1714
P15529-2	P15529	CD46	Isoform B of Membrane cofactor protein	2.03256e+07	8.36361e+06	1.43446e+07	5.92921e-05	7.27671e-05	6.60296e-05	6.7375e-06	1715
Q8IYB3	Q8IYB3	SRRM1	Serine/arginine repetitive matrix protein 1	2.24221e+07	7.64795e+06	1.5035e+07	6.54079e-05	6.65406e-05	6.59742e-05	5.66363e-07	1716
P41223	P41223	BUD31	Protein BUD31 homolog	3.673e+07	2.8286e+06	1.97793e+07	0.000107146	2.46101e-05	6.58778e-05	4.12678e-05	1717
Q9Y5U9	Q9Y5U9	IER3IP1	Immediate early response 3-interacting protein 1		7.56565e+06	7.56565e+06		6.58245e-05	6.58245e-05	6.58245e-05	1718
Q96BR5	Q96BR5	COA7	Cytochrome c oxidase assembly factor 7	2.77656e+07	5.80309e+06	1.67843e+07	8.09954e-05	5.04894e-05	6.57424e-05	1.5253e-05	1719
Q8WWY3	Q8WWY3	PRPF31	U4/U6 small nuclear ribonucleoprotein Prp31	1.7497e+07	9.21771e+06	1.33574e+07	5.10409e-05	8.01982e-05	6.56196e-05	1.45786e-05	1720
Q92522	Q92522	H1FX	Histone H1x	1.60379e+07	9.70262e+06	1.28702e+07	4.67843e-05	8.44171e-05	6.56007e-05	1.88164e-05	1721
Q5U5X0	Q5U5X0	LYRM7	Complex III assembly factor LYRM7	2.23792e+07	7.53466e+06	1.49569e+07	6.52827e-05	6.55549e-05	6.54188e-05	1.36123e-07	1722
P00568	P00568	AK1	Adenylate kinase isoenzyme 1	3.08886e+07	4.6764e+06	1.77825e+07	9.01058e-05	4.06868e-05	6.53963e-05	2.47095e-05	1723
Q9UH62	Q9UH62	ARMCX3	Armadillo repeat-containing X-linked protein 3	1.96185e+07	8.40544e+06	1.4012e+07	5.72295e-05	7.31311e-05	6.51803e-05	7.95082e-06	1724
P20339	P20339	RAB5A	Ras-related protein Rab-5A	3.31638e+07	3.86057e+06	1.85122e+07	9.67426e-05	3.35887e-05	6.51657e-05	3.1577e-05	1725
Q8WUW1-2	Q8WUW1	BRK1	Isoform 2 of Protein BRICK1	1.01289e+06	1.46075e+07	7.8102e+06	2.95471e-06	0.000127092	6.50233e-05	6.20685e-05	1726
Q9NQ29	Q9NQ29	LUC7L	Putative RNA-binding protein Luc7-like 1	3.96778e+07	1.63862e+06	2.06582e+07	0.000115745	1.42567e-05	6.50008e-05	5.07441e-05	1727
P22830-2	P22830	FECH	Isoform 2 of Ferrochelatase, mitochondrial	2.10469e+07	7.86899e+06	1.44579e+07	6.13963e-05	6.84637e-05	6.493e-05	3.53375e-06	1728
Q12884	Q12884	FAP	Prolyl endopeptidase FAP	1.9658e+07	8.33351e+06	1.39958e+07	5.73448e-05	7.25052e-05	6.4925e-05	7.58024e-06	1729
P17050	P17050	NAGA	Alpha-N-acetylgalactosaminidase	1.60527e+07	9.4881e+06	1.27704e+07	4.68276e-05	8.25507e-05	6.46892e-05	1.78615e-05	1730
Q9NRW7	Q9NRW7	VPS45	Vacuolar protein sorting-associated protein 45	2.07513e+07	7.89497e+06	1.43231e+07	6.0534e-05	6.86898e-05	6.46119e-05	4.0779e-06	1731
Q9Y295	Q9Y295	DRG1	Developmentally-regulated GTP-binding protein 1	1.61014e+07	9.44766e+06	1.27745e+07	4.69696e-05	8.21989e-05	6.45843e-05	1.76146e-05	1732
Q15404	Q15404	RSU1	Ras suppressor protein 1	1.27538e+07	1.05214e+07	1.16376e+07	3.72043e-05	9.15412e-05	6.43728e-05	2.71684e-05	1733
O15533-3	O15533	TAPBP	Isoform 3 of Tapasin	2.27107e+07	7.17741e+06	1.4944e+07	6.62497e-05	6.24467e-05	6.43482e-05	1.90152e-06	1734
O43395	O43395	PRPF3	U4/U6 small nuclear ribonucleoprotein Prp3	2.36926e+07	6.83667e+06	1.52646e+07	6.91141e-05	5.9482e-05	6.42981e-05	4.81602e-06	1735
Q9HD33	Q9HD33	MRPL47	39S ribosomal protein L47, mitochondrial	2.12548e+07	7.65061e+06	1.44527e+07	6.20027e-05	6.65637e-05	6.42832e-05	2.2805e-06	1736
P35222	P35222	CTNNB1	Catenin beta-1	1.39775e+07	1.00793e+07	1.20284e+07	4.07739e-05	8.76947e-05	6.42343e-05	2.34604e-05	1737
Q96G21	Q96G21	IMP4	U3 small nucleolar ribonucleoprotein protein IMP4	2.28556e+07	7.09092e+06	1.49732e+07	6.66724e-05	6.16942e-05	6.41833e-05	2.48911e-06	1738
P19623	P19623	SRM	Spermidine synthase	2.76079e+07	5.49689e+06	1.65524e+07	8.05356e-05	4.78254e-05	6.41805e-05	1.63551e-05	1739
P82930	P82930	MRPS34	28S ribosomal protein S34, mitochondrial	2.63235e+07	5.86982e+06	1.60967e+07	7.67888e-05	5.10701e-05	6.39294e-05	1.28594e-05	1740
Q9NW15	Q9NW15	ANO10	Anoctamin-10	2.05316e+07	7.793e+06	1.41623e+07	5.9893e-05	6.78026e-05	6.38478e-05	3.95477e-06	1741
Q14914	Q14914	PTGR1	Prostaglandin reductase 1	1.35474e+07	1.01236e+07	1.18355e+07	3.95192e-05	8.80799e-05	6.37995e-05	2.42803e-05	1742
Q99417	Q99417	MYCBP	C-Myc-binding protein	2.0739e+07	7.69468e+06	1.42169e+07	6.04982e-05	6.69471e-05	6.37226e-05	3.22445e-06	1743
Q16881	Q16881	TXNRD1	Thioredoxin reductase 1, cytoplasmic	1.26111e+07	1.04163e+07	1.15137e+07	3.67881e-05	9.06262e-05	6.37071e-05	2.6919e-05	1744
O75828	O75828	CBR3	Carbonyl reductase [NADPH] 3	3.13378e+07	4.09099e+06	1.77144e+07	9.1416e-05	3.55934e-05	6.35047e-05	2.79113e-05	1745
O15118	O15118	NPC1	Niemann-Pick C1 protein	3.17534e+07	3.94382e+06	1.78486e+07	9.26284e-05	3.4313e-05	6.34707e-05	2.91577e-05	1746
O75845	O75845	SC5D	Lathosterol oxidase	1.79033e+07	8.58374e+06	1.32435e+07	5.22259e-05	7.46824e-05	6.34542e-05	1.12282e-05	1747
Q9H6E4	Q9H6E4	CCDC134	Coiled-coil domain-containing protein 134	2.29596e+07	6.88764e+06	1.49236e+07	6.69759e-05	5.99255e-05	6.34507e-05	3.52517e-06	1748
O15431	O15431	SLC31A1	High affinity copper uptake protein 1	5.5735e+06	1.27111e+07	9.14228e+06	1.62586e-05	0.000110592	6.34252e-05	4.71666e-05	1749
O95394-4	O95394	PGM3	Isoform 3 of Phosphoacetylglucosamine mutase	2.58802e+07	5.89394e+06	1.58871e+07	7.54957e-05	5.12799e-05	6.33878e-05	1.21079e-05	1750
Q16762	Q16762	TST	Thiosulfate sulfurtransferase	3.56744e+07	2.60555e+06	1.914e+07	0.000104067	2.26694e-05	6.3368e-05	4.06985e-05	1751
Q9BQE5	Q9BQE5	APOL2	Apolipoprotein L2	2.90906e+07	4.81259e+06	1.69516e+07	8.48608e-05	4.18717e-05	6.33662e-05	2.14946e-05	1752
P57105	P57105	SYNJ2BP	Synaptojanin-2-binding protein	1.91692e+07	8.12697e+06	1.36481e+07	5.59188e-05	7.07082e-05	6.33135e-05	7.39471e-06	1753
Q7Z417	Q7Z417	NUFIP2	Nuclear fragile X mental retardation-interacting protein 2	2.68089e+07	5.56398e+06	1.61864e+07	7.82046e-05	4.84091e-05	6.33069e-05	1.48978e-05	1754
Q9BZE1	Q9BZE1	MRPL37	39S ribosomal protein L37, mitochondrial	2.67935e+07	5.53695e+06	1.61652e+07	7.81597e-05	4.81739e-05	6.31668e-05	1.49929e-05	1755
Q14232	Q14232	EIF2B1	Translation initiation factor eIF-2B subunit alpha	1.9771e+07	7.881e+06	1.3826e+07	5.76745e-05	6.85682e-05	6.31214e-05	5.44687e-06	1756
Q14683	Q14683	SMC1A	Structural maintenance of chromosomes protein 1A	2.08353e+07	7.51639e+06	1.41759e+07	6.07791e-05	6.5396e-05	6.30875e-05	2.30843e-06	1757
P43235	P43235	CTSK	Cathepsin K	1.46331e+07	9.59279e+06	1.21129e+07	4.26865e-05	8.34615e-05	6.3074e-05	2.03875e-05	1758
P16035	P16035	TIMP2	Metalloproteinase inhibitor 2	1.94871e+07	7.95793e+06	1.37225e+07	5.68461e-05	6.92375e-05	6.30418e-05	6.19567e-06	1759
Q9UKK9	Q9UKK9	NUDT5	ADP-sugar pyrophosphatase	2.91232e+07	4.71359e+06	1.69184e+07	8.4956e-05	4.10104e-05	6.29832e-05	2.19728e-05	1760
Q9UMY1	Q9UMY1	NOL7	Nucleolar protein 7	2.07248e+07	7.52882e+06	1.41268e+07	6.04568e-05	6.55041e-05	6.29804e-05	2.52363e-06	1761
O75164	O75164	KDM4A	Lysine-specific demethylase 4A	4.28579e+07	104181	2.14811e+07	0.000125022	9.0642e-07	6.29641e-05	6.20576e-05	1762
Q8IX12	Q8IX12	CCAR1	Cell division cycle and apoptosis regulator protein 1	1.9063e+07	8.07738e+06	1.35702e+07	5.56089e-05	7.02768e-05	6.29429e-05	7.33392e-06	1763
Q6ZXV5	Q6ZXV5	TMTC3	Transmembrane and TPR repeat-containing protein 3	2.21067e+07	7.04292e+06	1.45748e+07	6.44879e-05	6.12765e-05	6.28822e-05	1.60569e-06	1764
Q9UL46	Q9UL46	PSME2	Proteasome activator complex subunit 2	1.96608e+07	7.85044e+06	1.37556e+07	5.73528e-05	6.83023e-05	6.28275e-05	5.47475e-06	1765
P30038	P30038	ALDH4A1	Delta-1-pyrroline-5-carboxylate dehydrogenase, mitochondrial	1.70152e+07	8.73162e+06	1.28734e+07	4.96354e-05	7.5969e-05	6.28022e-05	1.31668e-05	1766
Q06210	Q06210	GFPT1	Glutamine--fructose-6-phosphate aminotransferase [isomerizing] 1	2.8041e+07	4.99624e+06	1.65186e+07	8.17989e-05	4.34695e-05	6.26342e-05	1.91647e-05	1767
O95166	O95166	GABARAP	Gamma-aminobutyric acid receptor-associated protein	1.88567e+07	8.026e+06	1.34413e+07	5.50071e-05	6.98297e-05	6.24184e-05	7.41131e-06	1768
Q15070	Q15070	OXA1L	Mitochondrial inner membrane protein OXA1L	2.04689e+07	7.48448e+06	1.39767e+07	5.97103e-05	6.51183e-05	6.24143e-05	2.704e-06	1769
O15498	O15498	YKT6	Synaptobrevin homolog YKT6	2.98284e+07	4.32226e+06	1.70753e+07	8.70128e-05	3.76056e-05	6.23092e-05	2.47036e-05	1770
Q9Y520-4	Q9Y520	PRRC2C	Isoform 4 of Protein PRRC2C	2.1159e+07	7.21024e+06	1.41846e+07	6.17234e-05	6.27323e-05	6.22278e-05	5.04464e-07	1771
P23634	P23634	ATP2B4	Plasma membrane calcium-transporting ATPase 4	1.43571e+07	9.48826e+06	1.19227e+07	4.18815e-05	8.2552e-05	6.22168e-05	2.03353e-05	1772
P11388-4	P11388	TOP2A	Isoform 4 of DNA topoisomerase 2-alpha	2.73003e+07	5.14344e+06	1.62219e+07	7.96383e-05	4.47502e-05	6.21943e-05	1.74441e-05	1773
P82933	P82933	MRPS9	28S ribosomal protein S9, mitochondrial	2.50092e+07	5.90017e+06	1.54547e+07	7.29549e-05	5.13341e-05	6.21445e-05	1.08104e-05	1774
Q9Y6G9	Q9Y6G9	DYNC1LI1	Cytoplasmic dynein 1 light intermediate chain 1	2.85215e+07	4.71084e+06	1.66162e+07	8.32006e-05	4.09864e-05	6.20935e-05	2.11071e-05	1775
Q6UXV4	Q6UXV4	APOOL	MICOS complex subunit MIC27	2.6875e+07	5.24715e+06	1.60611e+07	7.83977e-05	4.56526e-05	6.20251e-05	1.63726e-05	1776
Q9H4G4	Q9H4G4	GLIPR2	Golgi-associated plant pathogenesis-related protein 1	8.46128e+06	1.14147e+07	9.93801e+06	2.46826e-05	9.93134e-05	6.1998e-05	3.73154e-05	1777
Q96KC8	Q96KC8	DNAJC1	DnaJ homolog subfamily C member 1	2.45193e+07	6.02515e+06	1.52722e+07	7.15257e-05	5.24215e-05	6.19736e-05	9.55212e-06	1778
Q9BQQ3	Q9BQQ3	GORASP1	Golgi reassembly-stacking protein 1	1.88185e+07	7.92857e+06	1.33735e+07	5.48959e-05	6.89821e-05	6.1939e-05	7.04311e-06	1779
P53803	P53803	POLR2K	DNA-directed RNA polymerases I, II, and III subunit RPABC4	1.4314e+07	9.4367e+06	1.18754e+07	4.17557e-05	8.21035e-05	6.19296e-05	2.01739e-05	1780
Q9UBU9	Q9UBU9	NXF1	Nuclear RNA export factor 1	2.13964e+07	7.06092e+06	1.42287e+07	6.24158e-05	6.14332e-05	6.19245e-05	4.91302e-07	1781
P20810-6	P20810	CAST	Isoform 6 of Calpastatin	2.31454e+07	6.47218e+06	1.48088e+07	6.75179e-05	5.63109e-05	6.19144e-05	5.60352e-06	1782
P08237-3	P08237	PFKM	Isoform 3 of ATP-dependent 6-phosphofructokinase, muscle type	1.0833e+07	1.05991e+07	1.0716e+07	3.16012e-05	9.22165e-05	6.19089e-05	3.03076e-05	1783
Q9H0A0	Q9H0A0	NAT10	RNA cytidine acetyltransferase	2.31348e+07	6.47134e+06	1.48031e+07	6.74871e-05	5.63035e-05	6.18953e-05	5.59176e-06	1784
Q6PKG0	Q6PKG0	LARP1	La-related protein 1	2.09012e+07	7.21296e+06	1.40571e+07	6.09713e-05	6.27559e-05	6.18636e-05	8.92309e-07	1785
P22234-2	P22234	PAICS	Isoform 2 of Multifunctional protein ADE2	2.84527e+07	4.67348e+06	1.65631e+07	8.29999e-05	4.06614e-05	6.18306e-05	2.11693e-05	1786
Q15746-6	Q15746	MYLK	Isoform Del-1790 of Myosin light chain kinase, smooth muscle	1.25086e+07	1.00189e+07	1.12637e+07	3.64889e-05	8.71689e-05	6.18289e-05	2.534e-05	1787
Q16352	Q16352	INA	Alpha-internexin	2.14513e+07	7.00718e+06	1.42293e+07	6.25761e-05	6.09655e-05	6.17708e-05	8.05262e-07	1788
P23786	P23786	CPT2	Carnitine O-palmitoyltransferase 2, mitochondrial	1.52046e+07	9.08849e+06	1.21466e+07	4.43537e-05	7.90739e-05	6.17138e-05	1.73601e-05	1789
Q13740	Q13740	ALCAM	CD166 antigen	4.22483e+06	1.27574e+07	8.49109e+06	1.23243e-05	0.000110995	6.16595e-05	4.93352e-05	1790
Q04323-2	Q04323	UBXN1	Isoform 2 of UBX domain-containing protein 1	2.13515e+07	6.98367e+06	1.41676e+07	6.22849e-05	6.0761e-05	6.1523e-05	7.61924e-07	1791
Q9Y4W6	Q9Y4W6	AFG3L2	AFG3-like protein 2	2.3048e+07	6.39527e+06	1.47216e+07	6.72337e-05	5.56417e-05	6.14377e-05	5.79599e-06	1792
P52948	P52948	NUP98	Nuclear pore complex protein Nup98-Nup96	2.26529e+07	6.51585e+06	1.45844e+07	6.60813e-05	5.66908e-05	6.1386e-05	4.69525e-06	1793
P52657	P52657	GTF2A2	Transcription initiation factor IIA subunit 2	3.28833e+07	3.07765e+06	1.79805e+07	9.59244e-05	2.67769e-05	6.13507e-05	3.45738e-05	1794
O14519	O14519	CDK2AP1	Cyclin-dependent kinase 2-associated protein 1	1.71147e+07	8.36312e+06	1.27389e+07	4.99255e-05	7.27628e-05	6.13442e-05	1.14187e-05	1795
P48059-3	P48059	LIMS1	Isoform 3 of LIM and senescent cell antigen-like-containing domain protein 1	1.28759e+07	9.77631e+06	1.13261e+07	3.75606e-05	8.50582e-05	6.13094e-05	2.37488e-05	1796
P60604	P60604	UBE2G2	Ubiquitin-conjugating enzyme E2 G2	3.00748e+07	3.99142e+06	1.70331e+07	8.77317e-05	3.47271e-05	6.12294e-05	2.65023e-05	1797
O95478	O95478	NSA2	Ribosome biogenesis protein NSA2 homolog	2.77532e+07	4.75215e+06	1.62527e+07	8.09593e-05	4.13458e-05	6.11525e-05	1.98068e-05	1798
O00743-3	O00743	PPP6C	Isoform 3 of Serine/threonine-protein phosphatase 6 catalytic subunit	2.78345e+07	4.72315e+06	1.62788e+07	8.11966e-05	4.10935e-05	6.1145e-05	2.00516e-05	1799
P52888	P52888	THOP1	Thimet oligopeptidase	1.51784e+07	8.95957e+06	1.2069e+07	4.42771e-05	7.79522e-05	6.11146e-05	1.68376e-05	1800
P00390	P00390	GSR	Glutathione reductase, mitochondrial	2.78017e+07	4.72563e+06	1.62637e+07	8.11009e-05	4.11151e-05	6.1108e-05	1.99929e-05	1801
Q92542	Q92542	NCSTN	Nicastrin	1.78287e+07	8.06608e+06	1.29474e+07	5.20083e-05	7.01785e-05	6.10934e-05	9.08508e-06	1802
P41227	P41227	NAA10	N-alpha-acetyltransferase 10	3.02416e+07	3.85391e+06	1.70478e+07	8.82184e-05	3.35307e-05	6.08746e-05	2.73438e-05	1803
Q86Y39	Q86Y39	NDUFA11	NADH dehydrogenase [ubiquinone] 1 alpha subcomplex subunit 11	2.06532e+07	7.06706e+06	1.38601e+07	6.02477e-05	6.14866e-05	6.08671e-05	6.19416e-07	1804
P19525	P19525	EIF2AK2	Interferon-induced, double-stranded RNA-activated protein kinase	1.42992e+07	9.12093e+06	1.17101e+07	4.17124e-05	7.93561e-05	6.05343e-05	1.88219e-05	1805
Q9NTZ6	Q9NTZ6	RBM12	RNA-binding protein 12	2.00642e+07	7.14399e+06	1.36041e+07	5.85296e-05	6.21559e-05	6.03427e-05	1.81317e-06	1806
Q8N1G4	Q8N1G4	LRRC47	Leucine-rich repeat-containing protein 47	2.54005e+07	5.33997e+06	1.53702e+07	7.40962e-05	4.64601e-05	6.02782e-05	1.3818e-05	1807
Q9BUP3-3	Q9BUP3	HTATIP2	Isoform 3 of Oxidoreductase HTATIP2	2.66503e+07	4.89876e+06	1.57745e+07	7.7742e-05	4.26214e-05	6.01817e-05	1.75603e-05	1808
P06280	P06280	GLA	Alpha-galactosidase A	3.13647e+07	3.30931e+06	1.7337e+07	9.14946e-05	2.87925e-05	6.01436e-05	3.13511e-05	1809
Q14692	Q14692	BMS1	Ribosome biogenesis protein BMS1 homolog	2.26589e+07	6.20557e+06	1.44323e+07	6.60988e-05	5.39912e-05	6.0045e-05	6.0538e-06	1810
Q9BRR6	Q9BRR6	ADPGK	ADP-dependent glucokinase	1.96304e+07	7.21964e+06	1.3425e+07	5.72643e-05	6.28141e-05	6.00392e-05	2.77491e-06	1811
P36551	P36551	CPOX	Oxygen-dependent coproporphyrinogen-III oxidase, mitochondrial	1.86985e+07	7.52851e+06	1.31135e+07	5.45458e-05	6.55014e-05	6.00236e-05	5.47781e-06	1812
Q9UKS6	Q9UKS6	PACSIN3	Protein kinase C and casein kinase substrate in neurons protein 3	1.06709e+07	1.02168e+07	1.04438e+07	3.11282e-05	8.88909e-05	6.00096e-05	2.88813e-05	1813
P51688	P51688	SGSH	N-sulphoglucosamine sulphohydrolase	1.71697e+07	8.02341e+06	1.25965e+07	5.0086e-05	6.98072e-05	5.99466e-05	9.86063e-06	1814
Q9H4M9	Q9H4M9	EHD1	EH domain-containing protein 1	1.67347e+07	8.16812e+06	1.24514e+07	4.88172e-05	7.10663e-05	5.99417e-05	1.11245e-05	1815
O75431	O75431	MTX2	Metaxin-2	1.82591e+07	7.64792e+06	1.29535e+07	5.32639e-05	6.65403e-05	5.99021e-05	6.63822e-06	1816
P16219	P16219	ACADS	Short-chain specific acyl-CoA dehydrogenase, mitochondrial	1.50365e+07	8.72689e+06	1.18817e+07	4.38633e-05	7.59278e-05	5.98956e-05	1.60323e-05	1817
O75694	O75694	NUP155	Nuclear pore complex protein Nup155	1.72481e+07	7.98393e+06	1.2616e+07	5.03146e-05	6.94637e-05	5.98892e-05	9.57454e-06	1818
P30505	P30505	HLA-C	HLA class I histocompatibility antigen, Cw-8 alpha chain	3.31986e+07	2.63261e+06	1.79156e+07	9.68442e-05	2.29049e-05	5.98746e-05	3.69696e-05	1819
Q9BV38	Q9BV38	WDR18	WD repeat-containing protein 18	2.61559e+07	4.99271e+06	1.55743e+07	7.62998e-05	4.34388e-05	5.98693e-05	1.64305e-05	1820
Q9NQG1	Q9NQG1	MANBAL	Protein MANBAL	1.25507e+07	9.52273e+06	1.10367e+07	3.66118e-05	8.2852e-05	5.97319e-05	2.31201e-05	1821
O43674	O43674	NDUFB5	NADH dehydrogenase [ubiquinone] 1 beta subcomplex subunit 5, mitochondrial	1.577e+07	8.43241e+06	1.21012e+07	4.60031e-05	7.33657e-05	5.96844e-05	1.36813e-05	1822
Q13492	Q13492	PICALM	Phosphatidylinositol-binding clathrin assembly protein	1.8912e+07	7.35614e+06	1.31341e+07	5.51684e-05	6.40017e-05	5.95851e-05	4.41664e-06	1823
P21810	P21810	BGN	Biglycan	3.35045e+06	1.25682e+07	7.9593e+06	9.77365e-06	0.000109349	5.95611e-05	4.97874e-05	1824
Q9Y2Z4	Q9Y2Z4	YARS2	Tyrosine--tRNA ligase, mitochondrial	1.75942e+07	7.77033e+06	1.26822e+07	5.13242e-05	6.76054e-05	5.94648e-05	8.14057e-06	1825
Q9P0J0-2	Q9P0J0	NDUFA13	Isoform 2 of NADH dehydrogenase [ubiquinone] 1 alpha subcomplex subunit 13	1.75962e+07	7.76748e+06	1.26818e+07	5.13301e-05	6.75805e-05	5.94553e-05	8.12519e-06	1826
O75394	O75394	MRPL33	39S ribosomal protein L33, mitochondrial	1.95436e+07	7.10169e+06	1.33227e+07	5.70111e-05	6.17878e-05	5.93995e-05	2.38835e-06	1827
P62942	P62942	FKBP1A	Peptidyl-prolyl cis-trans isomerase FKBP1A	1.53662e+07	8.48429e+06	1.19253e+07	4.48251e-05	7.38171e-05	5.93211e-05	1.4496e-05	1828
P53004	P53004	BLVRA	Biliverdin reductase A	2.53189e+07	5.14188e+06	1.52304e+07	7.38583e-05	4.47367e-05	5.92975e-05	1.45608e-05	1829
P29536	P29536	LMOD1	Leiomodin-1	6.85093e+06	1.13324e+07	9.09169e+06	1.9985e-05	9.85973e-05	5.92911e-05	3.93062e-05	1830
P62070-4	P62070	RRAS2	Isoform 4 of Ras-related protein R-Ras2	1.35258e+07	9.08498e+06	1.13054e+07	3.94565e-05	7.90433e-05	5.92499e-05	1.97934e-05	1831
P22033	P22033	MUT	Methylmalonyl-CoA mutase, mitochondrial	1.47123e+07	8.68109e+06	1.16967e+07	4.29175e-05	7.55293e-05	5.92234e-05	1.63059e-05	1832
Q15020	Q15020	SART3	Squamous cell carcinoma antigen recognized by T-cells 3	1.95326e+07	7.06115e+06	1.32969e+07	5.69789e-05	6.14351e-05	5.9207e-05	2.22813e-06	1833
Q96KG9	Q96KG9	SCYL1	N-terminal kinase-like protein	2.35386e+07	5.7099e+06	1.46242e+07	6.86648e-05	4.96787e-05	5.91717e-05	9.49305e-06	1834
P53582	P53582	METAP1	Methionine aminopeptidase 1	1.98722e+07	6.92057e+06	1.33964e+07	5.79695e-05	6.0212e-05	5.90908e-05	1.12128e-06	1835
Q9Y3C1	Q9Y3C1	NOP16	Nucleolar protein 16	2.81036e+07	4.14698e+06	1.61253e+07	8.19815e-05	3.60806e-05	5.90311e-05	2.29505e-05	1836
Q99538	Q99538	LGMN	Legumain	2.28629e+07	5.89171e+06	1.43773e+07	6.66937e-05	5.12604e-05	5.89771e-05	7.71662e-06	1837
O43772	O43772	SLC25A20	Mitochondrial carnitine/acylcarnitine carrier protein	2.53246e+07	5.06611e+06	1.51954e+07	7.38749e-05	4.40774e-05	5.89762e-05	1.48987e-05	1838
P07741	P07741	APRT	Adenine phosphoribosyltransferase	2.4334e+07	5.36259e+06	1.48483e+07	7.09853e-05	4.66569e-05	5.88211e-05	1.21642e-05	1839
Q9NP79	Q9NP79	VTA1	Vacuolar protein sorting-associated protein VTA1 homolog	1.0536e+07	9.97953e+06	1.02577e+07	3.07346e-05	8.68263e-05	5.87805e-05	2.80459e-05	1840
P17152	P17152	TMEM11	Transmembrane protein 11, mitochondrial	2.23063e+07	5.98055e+06	1.41434e+07	6.507e-05	5.20334e-05	5.85517e-05	6.5183e-06	1841
Q96FW1	Q96FW1	OTUB1	Ubiquitin thioesterase OTUB1	2.20406e+07	6.0635e+06	1.40521e+07	6.42951e-05	5.27551e-05	5.85251e-05	5.76996e-06	1842
Q06055-2	Q06055	ATP5G2	Isoform 2 of ATP synthase F(0) complex subunit C2, mitochondrial	2.81561e+07	4.00873e+06	1.60824e+07	8.21348e-05	3.48777e-05	5.85062e-05	2.36285e-05	1843
Q9NYK5-2	Q9NYK5	MRPL39	Isoform 2 of 39S ribosomal protein L39, mitochondrial	2.00316e+07	6.72094e+06	1.33763e+07	5.84346e-05	5.84752e-05	5.84549e-05	2.02905e-08	1844
O15155	O15155	BET1	BET1 homolog	2.37187e+07	5.47459e+06	1.45966e+07	6.91901e-05	4.76314e-05	5.84108e-05	1.07794e-05	1845
Q96A57-2	Q96A57	TMEM230	Isoform 1 of Transmembrane protein 230	1.10587e+07	9.70287e+06	1.03808e+07	3.22595e-05	8.44193e-05	5.83394e-05	2.60799e-05	1846
O00479	O00479	HMGN4	High mobility group nucleosome-binding domain-containing protein 4	2.38002e+07	5.42877e+06	1.46145e+07	6.9428e-05	4.72327e-05	5.83303e-05	1.10977e-05	1847
Q52LJ0-2	Q52LJ0	FAM98B	Isoform 2 of Protein FAM98B	1.61372e+07	7.99795e+06	1.20676e+07	4.70742e-05	6.95857e-05	5.83299e-05	1.12558e-05	1848
Q9NVD7	Q9NVD7	PARVA	Alpha-parvin	1.14267e+07	9.56014e+06	1.04934e+07	3.33331e-05	8.31774e-05	5.82553e-05	2.49222e-05	1849
Q96TA1	Q96TA1	FAM129B	Niban-like protein 1	1.72017e+07	7.61627e+06	1.2409e+07	5.01793e-05	6.62649e-05	5.82221e-05	8.04282e-06	1850
P51398	P51398	DAP3	28S ribosomal protein S29, mitochondrial	2.26704e+07	5.77749e+06	1.42239e+07	6.61322e-05	5.02667e-05	5.81995e-05	7.93272e-06	1851
Q4V9L6	Q4V9L6	TMEM119	Transmembrane protein 119	2.1868e+07	6.03259e+06	1.39503e+07	6.37915e-05	5.24862e-05	5.81388e-05	5.65265e-06	1852
P29558	P29558	RBMS1	RNA-binding motif, single-stranded-interacting protein 1	2.2904e+07	5.67733e+06	1.42907e+07	6.68138e-05	4.93953e-05	5.81045e-05	8.70923e-06	1853
Q9H6Z4	Q9H6Z4	RANBP3	Ran-binding protein 3	2.66163e+07	4.40876e+06	1.55125e+07	7.76428e-05	3.83582e-05	5.80005e-05	1.96423e-05	1854
Q9C002	Q9C002	NMES1	Normal mucosa of esophagus-specific gene 1 protein	2.36454e+07	5.38744e+06	1.45164e+07	6.89763e-05	4.68731e-05	5.79247e-05	1.10516e-05	1855
P09601	P09601	HMOX1	Heme oxygenase 1	1.90528e+07	6.92351e+06	1.29882e+07	5.55794e-05	6.02376e-05	5.79085e-05	2.32911e-06	1856
P42785-2	P42785	PRCP	Isoform 2 of Lysosomal Pro-X carboxypeptidase	1.85786e+07	7.06416e+06	1.28214e+07	5.41961e-05	6.14613e-05	5.78287e-05	3.6326e-06	1857
Q9NQ55-3	Q9NQ55	PPAN	Isoform 3 of Suppressor of SWI4 1 homolog	1.81536e+07	7.19798e+06	1.26758e+07	5.29561e-05	6.26257e-05	5.77909e-05	4.83478e-06	1858
Q96EX1	Q96EX1	SMIM12	Small integral membrane protein 12	2.02167e+07	6.49948e+06	1.33581e+07	5.89745e-05	5.65484e-05	5.77615e-05	1.21308e-06	1859
P40123	P40123	CAP2	Adenylyl cyclase-associated protein 2	5.0111e+06	1.15839e+07	8.2975e+06	1.4618e-05	0.000100785	5.77015e-05	4.30835e-05	1860
Q8NBJ7	Q8NBJ7	SUMF2	Sulfatase-modifying factor 2	1.57549e+07	7.96968e+06	1.18623e+07	4.5959e-05	6.93397e-05	5.76494e-05	1.16903e-05	1861
O75940	O75940	SMNDC1	Survival of motor neuron-related-splicing factor 30	3.23308e+07	2.40544e+06	1.73681e+07	9.43128e-05	2.09284e-05	5.76206e-05	3.66922e-05	1862
Q05682-5	Q05682	CALD1	Isoform 5 of Caldesmon	1.17574e+07	9.27778e+06	1.05176e+07	3.42976e-05	8.07208e-05	5.75092e-05	2.32116e-05	1863
Q08379	Q08379	GOLGA2	Golgin subfamily A member 2	2.04262e+07	6.3689e+06	1.33976e+07	5.95857e-05	5.54122e-05	5.7499e-05	2.08674e-06	1864
Q9BYD2	Q9BYD2	MRPL9	39S ribosomal protein L9, mitochondrial	3.10695e+07	2.77517e+06	1.69224e+07	9.06335e-05	2.41452e-05	5.73894e-05	3.32442e-05	1865
Q5BKZ1	Q5BKZ1	ZNF326	DBIRD complex subunit ZNF326	2.46282e+07	4.92466e+06	1.47764e+07	7.18434e-05	4.28467e-05	5.73451e-05	1.44984e-05	1866
P43246	P43246	MSH2	DNA mismatch repair protein Msh2	2.63548e+07	4.31014e+06	1.53325e+07	7.688e-05	3.75001e-05	5.71901e-05	1.96899e-05	1867
P26640	P26640	VARS	Valine--tRNA ligase	1.94011e+07	6.62067e+06	1.30109e+07	5.65953e-05	5.76028e-05	5.70991e-05	5.03731e-07	1868
Q9BWD1-2	Q9BWD1	ACAT2	Isoform 2 of Acetyl-CoA acetyltransferase, cytosolic	1.98658e+07	6.453e+06	1.31594e+07	5.7951e-05	5.6144e-05	5.70475e-05	9.03525e-07	1869
Q96EE3-1	Q96EE3	SEH1L	Isoform B of Nucleoporin SEH1	1.30886e+07	8.72387e+06	1.09063e+07	3.81811e-05	7.59015e-05	5.70413e-05	1.88602e-05	1870
P57740	P57740	NUP107	Nuclear pore complex protein Nup107	2.33107e+07	5.29209e+06	1.43014e+07	6.8e-05	4.60435e-05	5.70218e-05	1.09782e-05	1871
P49006	P49006	MARCKSL1	MARCKS-related protein	1.48717e+07	8.11536e+06	1.14935e+07	4.33825e-05	7.06073e-05	5.69949e-05	1.36124e-05	1872
Q9P258	Q9P258	RCC2	Protein RCC2	1.9562e+07	6.52009e+06	1.30411e+07	5.70647e-05	5.67277e-05	5.68962e-05	1.68522e-07	1873
P21127	P21127	CDK11B	Cyclin-dependent kinase 11B	2.26124e+07	5.47167e+06	1.4042e+07	6.59629e-05	4.7606e-05	5.67844e-05	9.17848e-06	1874
P23919	P23919	DTYMK	Thymidylate kinase	2.36803e+07	5.10471e+06	1.43925e+07	6.90781e-05	4.44132e-05	5.67457e-05	1.23324e-05	1875
Q96C86	Q96C86	DCPS	m7GpppX diphosphatase	3.33046e+07	1.85965e+06	1.75821e+07	9.71536e-05	1.61798e-05	5.66667e-05	4.04869e-05	1876
Q9H7B2	Q9H7B2	RPF2	Ribosome production factor 2 homolog	1.2987e+07	8.65509e+06	1.0821e+07	3.78846e-05	7.53031e-05	5.65938e-05	1.87093e-05	1877
Q5J8M3	Q5J8M3	EMC4	ER membrane protein complex subunit 4	1.21939e+07	8.92002e+06	1.05569e+07	3.5571e-05	7.76082e-05	5.65896e-05	2.10186e-05	1878
P30046	P30046	DDT	D-dopachrome decarboxylase	3.0222e+07	2.83627e+06	1.65291e+07	8.81611e-05	2.46768e-05	5.64189e-05	3.17422e-05	1879
Q16740	Q16740	CLPP	ATP-dependent Clp protease proteolytic subunit, mitochondrial	3.36747e+07	1.66491e+06	1.76698e+07	9.8233e-05	1.44855e-05	5.63592e-05	4.18738e-05	1880
P68402	P68402	PAFAH1B2	Platelet-activating factor acetylhydrolase IB subunit beta	1.43191e+06	1.24709e+07	6.95141e+06	4.17704e-06	0.000108502	5.63397e-05	5.21627e-05	1881
Q15113	Q15113	PCOLCE	Procollagen C-endopeptidase enhancer 1	7.3848e+06	1.04722e+07	8.9285e+06	2.15423e-05	9.11128e-05	5.63275e-05	3.47852e-05	1882
P48449	P48449	LSS	Lanosterol synthase	1.55652e+07	7.6839e+06	1.16246e+07	4.54056e-05	6.68534e-05	5.61295e-05	1.07239e-05	1883
Q02252	Q02252	ALDH6A1	Methylmalonate-semialdehyde dehydrogenase [acylating], mitochondrial	1.90111e+07	6.51545e+06	1.27633e+07	5.54575e-05	5.66873e-05	5.60724e-05	6.1489e-07	1884
O95486	O95486	SEC24A	Protein transport protein Sec24A	1.58468e+07	7.576e+06	1.17114e+07	4.62269e-05	6.59146e-05	5.60708e-05	9.8438e-06	1885
Q01658	Q01658	DR1	Protein Dr1	2.28298e+07	5.21631e+06	1.4023e+07	6.65971e-05	4.53842e-05	5.59906e-05	1.06065e-05	1886
Q9BQB6	Q9BQB6	VKORC1	Vitamin K epoxide reductase complex subunit 1	1.40395e+07	8.15905e+06	1.10993e+07	4.09548e-05	7.09873e-05	5.59711e-05	1.50162e-05	1887
Q92905	Q92905	COPS5	COP9 signalosome complex subunit 5	1.92294e+07	6.41518e+06	1.28223e+07	5.60945e-05	5.58149e-05	5.59547e-05	1.39829e-07	1888
Q07954	Q07954	LRP1	Prolow-density lipoprotein receptor-related protein 1	1.52918e+07	7.7215e+06	1.15067e+07	4.46081e-05	6.71805e-05	5.58943e-05	1.12862e-05	1889
Q9BXK5	Q9BXK5	BCL2L13	Bcl-2-like protein 13	1.67196e+07	7.23925e+06	1.19795e+07	4.87732e-05	6.29847e-05	5.5879e-05	7.10577e-06	1890
Q14008	Q14008	CKAP5	Cytoskeleton-associated protein 5	1.86963e+07	6.57257e+06	1.26344e+07	5.45392e-05	5.71842e-05	5.58617e-05	1.3225e-06	1891
Q7L2E3-2	Q7L2E3	DHX30	Isoform 2 of Putative ATP-dependent RNA helicase DHX30	1.69025e+07	7.16304e+06	1.20328e+07	4.93066e-05	6.23216e-05	5.58141e-05	6.50751e-06	1892
Q8NE86	Q8NE86	MCU	Calcium uniporter protein, mitochondrial	1.51376e+07	7.75306e+06	1.14453e+07	4.41581e-05	6.74551e-05	5.58066e-05	1.16485e-05	1893
Q9BXJ9	Q9BXJ9	NAA15	N-alpha-acetyltransferase 15, NatA auxiliary subunit	2.14223e+07	5.62611e+06	1.35242e+07	6.24914e-05	4.89497e-05	5.57205e-05	6.77083e-06	1894
Q9BW92	Q9BW92	TARS2	Threonine--tRNA ligase, mitochondrial	4.00146e+06	1.14619e+07	7.73168e+06	1.16727e-05	9.97236e-05	5.56982e-05	4.40255e-05	1895
P02649	P02649	APOE	Apolipoprotein E	2.84213e+07	3.274e+06	1.58476e+07	8.29082e-05	2.84853e-05	5.56967e-05	2.72115e-05	1896
P17480	P17480	UBTF	Nucleolar transcription factor 1	1.65348e+07	7.24734e+06	1.18911e+07	4.8234e-05	6.3055e-05	5.56445e-05	7.41053e-06	1897
P48723	P48723	HSPA13	Heat shock 70 kDa protein 13	2.04796e+07	5.9233e+06	1.32014e+07	5.97413e-05	5.15354e-05	5.56384e-05	4.10297e-06	1898
P18583-5	P18583	SON	Isoform D of Protein SON	2.28661e+07	5.11964e+06	1.39929e+07	6.67032e-05	4.45431e-05	5.56232e-05	1.10801e-05	1899
P12277	P12277	CKB	Creatine kinase B-type	3.00413e+07	2.6948e+06	1.63681e+07	8.76341e-05	2.3446e-05	5.554e-05	3.20941e-05	1900
O00410-3	O00410	IPO5	Isoform 3 of Importin-5	1.57498e+07	7.484e+06	1.16169e+07	4.59441e-05	6.51142e-05	5.55291e-05	9.58504e-06	1901
P51610-4	P51610	HCFC1	Isoform 4 of Host cell factor 1	1.42347e+07	7.98302e+06	1.11088e+07	4.15242e-05	6.94558e-05	5.549e-05	1.39658e-05	1902
Q5HYI8	Q5HYI8	RABL3	Rab-like protein 3	1.62517e+07	7.29508e+06	1.17734e+07	4.74082e-05	6.34705e-05	5.54393e-05	8.03112e-06	1903
Q9UHD9	Q9UHD9	UBQLN2	Ubiquilin-2	1.93778e+07	6.23949e+06	1.28087e+07	5.65274e-05	5.42863e-05	5.54069e-05	1.12053e-06	1904
Q9Y2Z0	Q9Y2Z0	SUGT1	Protein SGT1 homolog	1.8635e+07	6.47838e+06	1.25567e+07	5.43604e-05	5.63648e-05	5.53626e-05	1.0022e-06	1905
P07947	P07947	YES1	Tyrosine-protein kinase Yes	1.45864e+07	7.82139e+06	1.12039e+07	4.25502e-05	6.80496e-05	5.52999e-05	1.27497e-05	1906
P82663	P82663	MRPS25	28S ribosomal protein S25, mitochondrial	1.14095e+07	8.87025e+06	1.01399e+07	3.3283e-05	7.71751e-05	5.52291e-05	2.19461e-05	1907
O14908	O14908	GIPC1	PDZ domain-containing protein GIPC1	8.45998e+06	9.82384e+06	9.14191e+06	2.46788e-05	8.54718e-05	5.50753e-05	3.03965e-05	1908
P22059	P22059	OSBP	Oxysterol-binding protein 1	1.05512e+07	9.09917e+06	9.8252e+06	3.07792e-05	7.91668e-05	5.4973e-05	2.41938e-05	1909
Q93062-3	Q93062	RBPMS	Isoform C of RNA-binding protein with multiple splicing	1.7093e+07	6.89835e+06	1.19957e+07	4.98624e-05	6.00187e-05	5.49406e-05	5.07817e-06	1910
Q9Y646	Q9Y646	CPQ	Carboxypeptidase Q	1.15693e+07	8.74602e+06	1.01576e+07	3.37489e-05	7.60943e-05	5.49216e-05	2.11727e-05	1911
Q9HCU0	Q9HCU0	CD248	Endosialin	5.19439e+06	1.08649e+07	8.02964e+06	1.51526e-05	9.45293e-05	5.4841e-05	3.96883e-05	1912
Q9BT09	Q9BT09	CNPY3	Protein canopy homolog 3	2.7301e+07	3.44883e+06	1.53749e+07	7.96403e-05	3.00064e-05	5.48233e-05	2.4817e-05	1913
Q9NVS2-2	Q9NVS2	MRPS18A	Isoform 2 of 28S ribosomal protein S18a, mitochondrial	1.49103e+07	7.54871e+06	1.12295e+07	4.34952e-05	6.56771e-05	5.45862e-05	1.1091e-05	1914
Q10567	Q10567	AP1B1	AP-1 complex subunit beta-1	1.846e+07	6.35709e+06	1.24085e+07	5.38499e-05	5.53095e-05	5.45797e-05	7.29816e-07	1915
Q9P016	Q9P016	THYN1	Thymocyte nuclear protein 1	1.60571e+07	7.1386e+06	1.15979e+07	4.68406e-05	6.2109e-05	5.44748e-05	7.6342e-06	1916
Q9Y2L1	Q9Y2L1	DIS3	Exosome complex exonuclease RRP44	2.43113e+07	4.35945e+06	1.43354e+07	7.0919e-05	3.79292e-05	5.44241e-05	1.64949e-05	1917
Q13643	Q13643	FHL3	Four and a half LIM domains protein 3	7.25188e+06	1.00674e+07	8.65966e+06	2.11546e-05	8.75912e-05	5.43729e-05	3.32183e-05	1918
Q9NZ01	Q9NZ01	TECR	Very-long-chain enoyl-CoA reductase	1.81072e+07	6.39637e+06	1.22518e+07	5.28209e-05	5.56513e-05	5.42361e-05	1.4152e-06	1919
Q9NTI5	Q9NTI5	PDS5B	Sister chromatid cohesion protein PDS5 homolog B	1.8661e+07	6.19675e+06	1.24289e+07	5.44363e-05	5.39145e-05	5.41754e-05	2.60919e-07	1920
O15382	O15382	BCAT2	Branched-chain-amino-acid aminotransferase, mitochondrial	1.4092e+07	7.70513e+06	1.08986e+07	4.1108e-05	6.70381e-05	5.40731e-05	1.2965e-05	1921
Q9NQG5	Q9NQG5	RPRD1B	Regulation of nuclear pre-mRNA domain-containing protein 1B	1.19475e+07	8.42129e+06	1.01844e+07	3.48522e-05	7.32689e-05	5.40606e-05	1.92084e-05	1922
O00161	O00161	SNAP23	Synaptosomal-associated protein 23	1.52646e+07	7.30241e+06	1.12835e+07	4.45286e-05	6.35342e-05	5.40314e-05	9.50279e-06	1923
Q96E11	Q96E11	MRRF	Ribosome-recycling factor, mitochondrial	2.03074e+07	5.58285e+06	1.29451e+07	5.9239e-05	4.85732e-05	5.39061e-05	5.33286e-06	1924
Q8NFH4	Q8NFH4	NUP37	Nucleoporin Nup37	1.26876e+07	8.13531e+06	1.04115e+07	3.70113e-05	7.07808e-05	5.3896e-05	1.68848e-05	1925
Q9GZL7	Q9GZL7	WDR12	Ribosome biogenesis protein WDR12	2.59521e+07	3.66915e+06	1.48106e+07	7.57054e-05	3.19232e-05	5.38143e-05	2.18911e-05	1926
Q9BRA2	Q9BRA2	TXNDC17	Thioredoxin domain-containing protein 17	8.11131e+06	9.64988e+06	8.8806e+06	2.36616e-05	8.39583e-05	5.381e-05	3.01483e-05	1927
Q8NAV1	Q8NAV1	PRPF38A	Pre-mRNA-splicing factor 38A	1.35087e+07	7.81129e+06	1.066e+07	3.94065e-05	6.79617e-05	5.36841e-05	1.42776e-05	1928
Q8IXI1	Q8IXI1	RHOT2	Mitochondrial Rho GTPase 2	1.4978e+07	7.29581e+06	1.11369e+07	4.36927e-05	6.34768e-05	5.35848e-05	9.89205e-06	1929
Q13363	Q13363	CTBP1	C-terminal-binding protein 1	2.03071e+07	5.49964e+06	1.29034e+07	5.92382e-05	4.78493e-05	5.35438e-05	5.69442e-06	1930
Q96L92	Q96L92	SNX27	Sorting nexin-27	7.67151e+06	9.71432e+06	8.69292e+06	2.23787e-05	8.45189e-05	5.34488e-05	3.10701e-05	1931
P56181-2	P56181	NDUFV3	Isoform 2 of NADH dehydrogenase [ubiquinone] flavoprotein 3, mitochondrial	2.05743e+07	5.38138e+06	1.29779e+07	6.00178e-05	4.68204e-05	5.34191e-05	6.59868e-06	1932
O76031	O76031	CLPX	ATP-dependent Clp protease ATP-binding subunit clpX-like, mitochondrial	2.05776e+07	5.36674e+06	1.29722e+07	6.00274e-05	4.6693e-05	5.33602e-05	6.6672e-06	1933
P49591	P49591	SARS	Serine--tRNA ligase, cytoplasmic	9.32736e+06	9.11734e+06	9.22235e+06	2.7209e-05	7.93249e-05	5.3267e-05	2.6058e-05	1934
P48507	P48507	GCLM	Glutamate--cysteine ligase regulatory subunit	2.00675e+07	5.50497e+06	1.27862e+07	5.85393e-05	4.78957e-05	5.32175e-05	5.32179e-06	1935
Q13523	Q13523	PRPF4B	Serine/threonine-protein kinase PRP4 homolog	1.21487e+07	8.13813e+06	1.01434e+07	3.54391e-05	7.08053e-05	5.31222e-05	1.76831e-05	1936
Q14980	Q14980	NUMA1	Nuclear mitotic apparatus protein 1	1.57458e+07	6.931e+06	1.13384e+07	4.59323e-05	6.03028e-05	5.31175e-05	7.18523e-06	1937
Q9UBV8	Q9UBV8	PEF1	Peflin	5.28117e+06	1.03993e+07	7.84026e+06	1.54058e-05	9.04789e-05	5.29424e-05	3.75366e-05	1938
Q9BRP8	Q9BRP8	PYM1	Partner of Y14 and mago	2.02765e+07	5.3573e+06	1.28169e+07	5.91489e-05	4.66109e-05	5.28799e-05	6.26898e-06	1939
C9JLW8	C9JLW8	MCRIP1	Mapk-regulated corepressor-interacting protein 1	6.65008e+06	9.91326e+06	8.28167e+06	1.93991e-05	8.62498e-05	5.28244e-05	3.34254e-05	1940
P51648-2	P51648	ALDH3A2	Isoform 2 of Fatty aldehyde dehydrogenase	1.67991e+07	6.48549e+06	1.16423e+07	4.9005e-05	5.64267e-05	5.27158e-05	3.71085e-06	1941
P10644	P10644	PRKAR1A	cAMP-dependent protein kinase type I-alpha regulatory subunit	1.22996e+07	7.99269e+06	1.01461e+07	3.58793e-05	6.95399e-05	5.27096e-05	1.68303e-05	1942
P33316	P33316	DUT	Deoxyuridine 5'-triphosphate nucleotidohydrolase, mitochondrial	1.82269e+07	6.00308e+06	1.2115e+07	5.317e-05	5.22295e-05	5.26998e-05	4.70269e-07	1943
O60749	O60749	SNX2	Sorting nexin-2	1.43018e+07	7.2913e+06	1.07966e+07	4.17201e-05	6.34375e-05	5.25788e-05	1.08587e-05	1944
Q9NZ43	Q9NZ43	USE1	Vesicle transport protein USE1	2.14904e+07	4.87863e+06	1.31845e+07	6.26901e-05	4.24463e-05	5.25682e-05	1.01219e-05	1945
Q9NQT4	Q9NQT4	EXOSC5	Exosome complex component RRP46	2.03361e+07	5.26275e+06	1.27994e+07	5.93227e-05	4.57883e-05	5.25555e-05	6.76721e-06	1946
Q9C0E8-4	Q9C0E8	LNP	Isoform 4 of Protein lunapark	2.08844e+07	5.07394e+06	1.29792e+07	6.09222e-05	4.41455e-05	5.25338e-05	8.38832e-06	1947
P82909	P82909	MRPS36	28S ribosomal protein S36, mitochondrial	1.3134e+07	7.67196e+06	1.0403e+07	3.83134e-05	6.67495e-05	5.25314e-05	1.4218e-05	1948
P48729-2	P48729	CSNK1A1	Isoform 2 of Casein kinase I isoform alpha	1.72556e+07	6.28969e+06	1.17727e+07	5.03368e-05	5.47231e-05	5.25299e-05	2.19316e-06	1949
Q96IZ0	Q96IZ0	PAWR	PRKC apoptosis WT1 regulator protein	2.06781e+07	5.13431e+06	1.29062e+07	6.03204e-05	4.46708e-05	5.24956e-05	7.82482e-06	1950
Q6UN15	Q6UN15	FIP1L1	Pre-mRNA 3'-end-processing factor FIP1	2.02496e+07	5.27212e+06	1.27608e+07	5.90704e-05	4.58698e-05	5.24701e-05	6.60029e-06	1951
Q96TC7	Q96TC7	RMDN3	Regulator of microtubule dynamics protein 3	1.88413e+07	5.7376e+06	1.22894e+07	5.49622e-05	4.99196e-05	5.24409e-05	2.52128e-06	1952
Q8WVY7	Q8WVY7	UBLCP1	Ubiquitin-like domain-containing CTD phosphatase 1	1.77688e+07	6.05967e+06	1.19142e+07	5.18338e-05	5.27218e-05	5.22778e-05	4.44015e-07	1953
Q99715	Q99715	COL12A1	Collagen alpha-1(XII) chain	1.01617e+07	8.60508e+06	9.38339e+06	2.96429e-05	7.4868e-05	5.22555e-05	2.26126e-05	1954
Q92947	Q92947	GCDH	Glutaryl-CoA dehydrogenase, mitochondrial	2.21357e+07	4.58286e+06	1.33593e+07	6.45724e-05	3.98729e-05	5.22226e-05	1.23497e-05	1955
Q9BRJ2	Q9BRJ2	MRPL45	39S ribosomal protein L45, mitochondrial	1.9238e+07	5.55112e+06	1.23946e+07	5.61195e-05	4.82972e-05	5.22083e-05	3.91113e-06	1956
P53567	P53567	CEBPG	CCAAT/enhancer-binding protein gamma	1.78775e+07		1.78775e+07	5.21507e-05		5.21507e-05		1957
Q13488	Q13488	TCIRG1	V-type proton ATPase 116 kDa subunit a isoform 3	2.49015e+07	3.61442e+06	1.4258e+07	7.26406e-05	3.14471e-05	5.20439e-05	2.05968e-05	1958
Q9BQ52	Q9BQ52	ELAC2	Zinc phosphodiesterase ELAC protein 2	2.06434e+07	5.04139e+06	1.28424e+07	6.02192e-05	4.38623e-05	5.20407e-05	8.17844e-06	1959
Q8N806	Q8N806	UBR7	Putative E3 ubiquitin-protein ligase UBR7	3.28946e+07	930209	1.69124e+07	9.59575e-05	8.09323e-06	5.20254e-05	4.39322e-05	1960
Q96EY4	Q96EY4	TMA16	Translation machinery-associated protein 16	1.7443e+07	6.10899e+06	1.1776e+07	5.08832e-05	5.31509e-05	5.20171e-05	1.13387e-06	1961
Q5JTJ3-2	Q5JTJ3	COA6	Isoform 2 of Cytochrome c oxidase assembly factor 6 homolog	1.73378e+07	6.14269e+06	1.17402e+07	5.05764e-05	5.34441e-05	5.20103e-05	1.43384e-06	1962
O43719	O43719	HTATSF1	HIV Tat-specific factor 1	2.50343e+07	3.56188e+06	1.42981e+07	7.30279e-05	3.09899e-05	5.20089e-05	2.1019e-05	1963
Q96A35	Q96A35	MRPL24	39S ribosomal protein L24, mitochondrial	2.33501e+07	4.11718e+06	1.37337e+07	6.81151e-05	3.58213e-05	5.19682e-05	1.61469e-05	1964
P82970	P82970	HMGN5	High mobility group nucleosome-binding domain-containing protein 5	3.31684e+07	820002	1.69942e+07	9.67562e-05	7.13438e-06	5.19453e-05	4.48109e-05	1965
Q8NE71	Q8NE71	ABCF1	ATP-binding cassette sub-family F member 1	2.25115e+07	4.38965e+06	1.34506e+07	6.56687e-05	3.81919e-05	5.19303e-05	1.37384e-05	1966
Q9Y399	Q9Y399	MRPS2	28S ribosomal protein S2, mitochondrial	1.85988e+07	5.69885e+06	1.21488e+07	5.42548e-05	4.95825e-05	5.19187e-05	2.33614e-06	1967
P12081	P12081	HARS	Histidine--tRNA ligase, cytoplasmic	1.98671e+07	5.26601e+06	1.25666e+07	5.79548e-05	4.58167e-05	5.18857e-05	6.06907e-06	1968
O43252	O43252	PAPSS1	Bifunctional 3'-phosphoadenosine 5'-phosphosulfate synthase 1	2.25294e+07	4.34998e+06	1.34397e+07	6.57208e-05	3.78468e-05	5.17838e-05	1.3937e-05	1969
Q96BM9	Q96BM9	ARL8A	ADP-ribosylation factor-like protein 8A	1.93417e+07	5.40878e+06	1.23752e+07	5.6422e-05	4.70588e-05	5.17404e-05	4.6816e-06	1970
P35080-2	P35080	PFN2	Isoform IIb of Profilin-2	1.14263e+07	8.05333e+06	9.73979e+06	3.33317e-05	7.00675e-05	5.16996e-05	1.83679e-05	1971
Q92665	Q92665	MRPS31	28S ribosomal protein S31, mitochondrial	1.70669e+07	6.14127e+06	1.16041e+07	4.97861e-05	5.34318e-05	5.1609e-05	1.82286e-06	1972
Q9H089	Q9H089	LSG1	Large subunit GTPase 1 homolog	2.10448e+07	4.78811e+06	1.29164e+07	6.13901e-05	4.16587e-05	5.15244e-05	9.8657e-06	1973
P09132	P09132	SRP19	Signal recognition particle 19 kDa protein	2.08033e+07	4.86655e+06	1.28349e+07	6.06857e-05	4.23411e-05	5.15134e-05	9.1723e-06	1974
Q14320	Q14320	FAM50A	Protein FAM50A	2.3224e+07	4.03838e+06	1.36312e+07	6.7747e-05	3.51357e-05	5.14413e-05	1.63057e-05	1975
Q9UNS2	Q9UNS2	COPS3	COP9 signalosome complex subunit 3	2.07693e+07	4.85722e+06	1.28133e+07	6.05865e-05	4.226e-05	5.14233e-05	9.16329e-06	1976
Q86TB9	Q86TB9	PATL1	Protein PAT1 homolog 1	3.04505e+07	1.59322e+06	1.60219e+07	8.88277e-05	1.38618e-05	5.13447e-05	3.7483e-05	1977
Q9UBL3	Q9UBL3	ASH2L	Set1/Ash2 histone methyltransferase complex subunit ASH2	1.67129e+07	6.19005e+06	1.14515e+07	4.87534e-05	5.38562e-05	5.13048e-05	2.5514e-06	1978
P05413	P05413	FABP3	Fatty acid-binding protein, heart	1.81418e+07	5.70974e+06	1.19258e+07	5.29218e-05	4.96773e-05	5.12996e-05	1.62228e-06	1979
Q9UNZ5	Q9UNZ5	C19orf53	Leydig cell tumor 10 kDa protein homolog	1.74632e+07	5.92009e+06	1.16916e+07	5.09422e-05	5.15074e-05	5.12248e-05	2.82628e-07	1980
Q53GS9	Q53GS9	USP39	U4/U6.U5 tri-snRNP-associated protein 2	1.42631e+07	6.98511e+06	1.06241e+07	4.16071e-05	6.07735e-05	5.11903e-05	9.5832e-06	1981
P82664	P82664	MRPS10	28S ribosomal protein S10, mitochondrial	1.79933e+07	5.72568e+06	1.18595e+07	5.24885e-05	4.9816e-05	5.11522e-05	1.33629e-06	1982
Q9Y5K5	Q9Y5K5	UCHL5	Ubiquitin carboxyl-terminal hydrolase isozyme L5	1.81257e+07	5.67742e+06	1.19016e+07	5.28749e-05	4.93961e-05	5.11355e-05	1.73941e-06	1983
Q8TCJ2	Q8TCJ2	STT3B	Dolichyl-diphosphooligosaccharide--protein glycosyltransferase subunit STT3B	1.41187e+07	7.01584e+06	1.05673e+07	4.11859e-05	6.10409e-05	5.11134e-05	9.92751e-06	1984
Q15061	Q15061	WDR43	WD repeat-containing protein 43	2.05554e+07	4.85545e+06	1.27054e+07	5.99626e-05	4.22446e-05	5.11036e-05	8.859e-06	1985
P49459	P49459	UBE2A	Ubiquitin-conjugating enzyme E2 A	2.12401e+07	4.61946e+06	1.29298e+07	6.196e-05	4.01914e-05	5.10757e-05	1.08843e-05	1986
Q9NTK5	Q9NTK5	OLA1	Obg-like ATPase 1	1.9324e+07	5.24974e+06	1.22869e+07	5.63704e-05	4.56751e-05	5.10228e-05	5.34768e-06	1987
Q9NQP4	Q9NQP4	PFDN4	Prefoldin subunit 4	7.60194e+06	9.17994e+06	8.39094e+06	2.21758e-05	7.98696e-05	5.10227e-05	2.88469e-05	1988
O00203	O00203	AP3B1	AP-3 complex subunit beta-1	1.71146e+07	5.98979e+06	1.15522e+07	4.99254e-05	5.21138e-05	5.10196e-05	1.09419e-06	1989
P35269	P35269	GTF2F1	General transcription factor IIF subunit 1	2.24901e+07	4.17875e+06	1.33344e+07	6.56062e-05	3.6357e-05	5.09816e-05	1.46246e-05	1990
O94760	O94760	DDAH1	N(G),N(G)-dimethylarginine dimethylaminohydrolase 1	2.16098e+07	4.45512e+06	1.30325e+07	6.30384e-05	3.87615e-05	5.08999e-05	1.21385e-05	1991
Q99615	Q99615	DNAJC7	DnaJ homolog subfamily C member 7	2.46423e+07	3.4304e+06	1.40364e+07	7.18846e-05	2.9846e-05	5.08653e-05	2.10193e-05	1992
Q96HN2	Q96HN2	AHCYL2	Adenosylhomocysteinase 3	2.24471e+07	4.16522e+06	1.33062e+07	6.54808e-05	3.62393e-05	5.086e-05	1.46208e-05	1993
Q99700	Q99700	ATXN2	Ataxin-2	1.90944e+07	5.28393e+06	1.21892e+07	5.57007e-05	4.59726e-05	5.08366e-05	4.86406e-06	1994
Q92925	Q92925	SMARCD2	SWI/SNF-related matrix-associated actin-dependent regulator of chromatin subfamily D member 2	1.82705e+07	5.55145e+06	1.19109e+07	5.32971e-05	4.83001e-05	5.07986e-05	2.49851e-06	1995
Q8WW12	Q8WW12	PCNP	PEST proteolytic signal-containing nuclear protein	2.50739e+07	3.25429e+06	1.41641e+07	7.31435e-05	2.83138e-05	5.07286e-05	2.24149e-05	1996
Q9UHL4	Q9UHL4	DPP7	Dipeptidyl peptidase 2	1.31637e+07	7.24533e+06	1.02045e+07	3.84e-05	6.30376e-05	5.07188e-05	1.23188e-05	1997
Q86V48	Q86V48	LUZP1	Leucine zipper protein 1	1.6845e+07	6.01094e+06	1.1428e+07	4.91388e-05	5.22978e-05	5.07183e-05	1.57949e-06	1998
P67812-3	P67812	SEC11A	Isoform 3 of Signal peptidase complex catalytic subunit SEC11A	1.70787e+07	5.92557e+06	1.15021e+07	4.98204e-05	5.15551e-05	5.06878e-05	8.67344e-07	1999
[truncated: 6,130 more rows]

## Sheet: Supplementary File 1D
RL1
ATGCCAGCCACAGACACAAACAGCACCCACACCACGCCGCTTCACCCAGAGGACCAACACACGTTACCCTTACACCACAGCACCACACAACCTCATGTCCAAACTTCGGACAAACACGCCGACAAACAACACCGCACGCAGATGGAGCTCGACGCCGCGGACTACGCTGCTTGCGCACAGGCCCGCCAACACCTCTACGGTCAAACACAACCCCAACTACACGCATACCCCAACGCCAACCCACAGGAAAGCGCTCATTTTCGCACAGAGAATCAACATCAACTCACAAATCTACTTCACAACATAGGCGAGGGCGCAGCGCTCGGCTACCCCGTCCCCCGCGCGGAAATCCGCCGCGGCGGTGGCGACTGGGCCGACAGCGCAAGCGACTTCGACGCC…
RL5A
ATGGATATGAGGAAACTGAATACCTCGCAGGGTCGAAATCTTACCACAGTTGATGATAGAAGACGGTTTTCCATCGGGTGGGAAACATGGGATGACGGTGGAGAGTCTCTATACGATGTGACTAATAATGGTACAACGGTCATCAATACAACAGCCTGTGTTTCAAGTTGTTCGCATACGTCGCTTGTGCTTTGCAATATGACGCAGCAGACTGATTCGTTGTACGGAGTGGGTCATCGGTTGAATGACGAAGAAGATGGTGAACTGTGGAGAGTTTCGGTTTCT
RL6
ATGACGTTGATATATGTGGATGCGGATAATACTCGTAATGAGCTAAAAGCGACGACTGGGAGTAATTTTACCATTACGCATAGGAAAGATCCGTTGACAACTAAGTGGAAAACCGTTTTTGGTAACAATGGTGATCAGTGGTTGTGCAACGTTACGGGTATAGGTAATGCTACTGTGAATGGTAACGCAACTATTTGTGTGTCGAGCTGTGGTCATAATACGTTGGATTTATGTAATTTAAAGTCGGGAGATTCTGGCTTCTTCGATCTGTCTCGTTGGTTCGGTGAAAACATGGATGAATACAGTGGTGATGTGTGGCACTTGGAAGTCAGC
RL8A
ATGCCTCACGGCCATCTCCGACAGGCCCTCTCCCCGACCTCCTGGACATGTGAGGGCTTGTTGCTCCTCCTGGGATTGCTGGTGCTCTTCTTTCACCACCACAACCAGTCGGCCGTGGAGAGGCGTCGCCGCGTCTCGTTCGTCGAGGCCGATCGACTGCCGCATGAGAGCGGGTGGTATTCTTCCGATGACGACGGAGACCGGGACGGTGATGAGGAAACTGGAGAGAGCCACAACAGAAACAGCGTGGGACTGTCCGCTGTTTTTAGC
RL9A
ATGTCTCTAGATGCCGCCAGCCACCAACCGGCGGCACGGCGGCTCTTGGATTCGGCATTGGTGCGCCGCGTCTTGGCCTGCATGATCATCGTCATCATGATCGCCATTAGCATCTGGATCCTGACCTACGTGCTGTTTCTC
RL10
ATGTATCCGCGTGTAATGCACGCGGTGTGCTTTTTAGCACTCGGTTTGATAAGCTACGTGGCCGTTTGCGCCGAAAACACGGTTACCACCAACTGTCTCGTGAAAGCAGAAAATACCCACCTGACATGTAAGTGCAATCCGAATACCACATCTAATACCAACAATGGCAGCAAGTGCCACGCGATGTGCAAATGCAGGGTCACAGAACCCATTACCATGCTAGGCGCATACTCGGCCTGGGGCGCGGGCTCGTTCGTGGCCACGCTGATAGTCCTGCTGGTGGTCTTCTTCGTAATTTACGCGCGCGAGGAGGAGAAAAACAACACGGGCACCGAGGTAGATCAATGTCTGGCCTATCGGAGCCTGACACGCAAAAAGCTGGAACAACACGCGGCTAAA…
RL11
ATGCAGACCTACAGCACCCCCCTCACGCTTATCATAGTCACGTCGCTGTTTTTGTTCACAACTCAGGGAAGTTCATCGAACGCCGTCGAACCAACCAAAAAACCCCTAAAGCTCGCCAACTACCGCGCCACCTGCGAGGACCGTACACGTACTCTGGTTACCAGGCTTAACACTAGCCATCACAGCGTAGTCTGGCAACGTTATGATATCTACAGCAGATACATGCGTCGTATGCCGCCACTTTGCATCATTACAGACGCCTATAAAGAAACCACGCATCAGGGTGGCGCAACTTTCACGTGCACGCGCCAAAATCTCACGCTGTACAATCTTACGGTTAAAGATACGGGAGTCTACCTCCTGCAGGATCAGTATACCGGCGATGTCGAGGCTTTCTAC…
RL12
ATGCGTGTTGACCGTCAAAAACGCAACAACTTCACGTATCGACAAACGGTATATATAATCCTGACCTTCTACATTGTATATAGGGGCAAATGTAACAGCACTGATACCAATAATTCTACGTCTACTTCAGATAGCACCGTCTCTGATACTAGTGTGTACTCTACTCCAAATCTTCCCAGTACATTTTTTACAACTCTTGATACATCTACTGGCTCACAGATATCAACCACCTCAAACACCATATCCAGCACTACAAATACATTGGCCGCATCTTCTATAACTACGTTAAACACCTCGACTAACACTACGTCTTATACAGCTTCAACTCTTACTGCTCTCTCCAGTACCCACACAAATTCCCCAATACTCTCCAACAACGCAACATTATACACCACATCG…
RL13
ATGCACTGGCATCTTGCGATTACATGGACGGTAATCATATTAACGTTTTCGGAATGTTACAACCAAACTTGTCCGTGCCCCTGCATTTGTGTCAATTCTACAACAGTTAGCATATCCACCAGTGAAACAACGTCTAAAAACATCACTCCAACTACCACGACAAATTCCAAAAAAACAACGTCAAGTATTGCTACCACTACACCCTCGTTAGTAACGACTGGCAAAGTCGTTTCTACTGCAGCGTCGTCAACCATAATATCTCAAACCAACCGCAGTCATACGAGTAATGCTATCACAACCCCGAAAACGCGATTTGAATATAATATCACGGGATATGTTGGCCAAGAAGTGACTCTAAACTTCACTGGATCATGGAATTACATTCAATGGTTCCGGTAC…
UL1
ATGGGTGTACAATGTAACAGTAAACTGCTGCTACTAGCCGTACTAATAACAATTATCCTATCTAGCATTCTGGTACAGGCAATTCCACATAAACAAAAAACATCCTACCAGCAGCTCTTGCTGCAAAGTGAACATGTACAAATACCCATCACAGTAGCCGAAGGAGATACAATTTGCTTTAACGTTAGTGATAACCCCTGCAACTTTTCTAGTTACTGGAATCACAATAACTGCGAACTTTGCGGTTGGACACCATTTTACTCGGAATATGCTGGATATTCCGAAAACAAGTCGTGTCACCCACGATTTACCTGTCTTCACGATACTAAAGGTCTGAAACTACACAACGTAACTACAAATGATTCAGGAATTTATACCCGAAACGTTTATTACTGTGAC…
UL2
ATGGCCGAAGACTCGGTCACGATCCTTATAGTCGAAGATGACGACGCATATCCGTCGTTCGGCAGCCTACCCGCCTCGCACGCTCAGTACGGCTTTCGACTGCTACGCAGCATATTTTTGATCATGCTTGTCATTTGGACCGCAGTGTGGCTCAAGCTGCTTCGAGACGCTCTTTTG
UL4
ATGATGCTTAGAACGTGGATATCATTACCGATGGTACTGCTTGACGCGTACTGTTTTTGTATTTTTGTGAGTTGTTCAATCAGCACGACGACTGCTCCCGTGGAATGGAAGTCTCCCGACCGTCAGATTCCTATGAATATTACTTGCGCTAATTACTCAGGGACCGTCAACGGCAACGTTACATTTCGAGGTCTTCAGAACAAAACGGAAGATTTTTTGCACTGGCTGTTAGGGTGGGGTCATAAGTCCATTTGTTCATTTTTTCCGAAACTCCAAGGCAATAAAGAACAACATTATATGTATGGAATAACGAATCTCACGTATAACTGTACCTATGACCGCCTGACGTTGCTGAATTTGACGACGGAAAACAGCGGAAAGTATTATTTCAAACGAGAA…
UL5
ATGTTTCTAGGCTACTCTGACTGTGTAGATCCCGGCCTTGCTGTGTATCGTGTATCTAGATCACGTTTAAAGCTCATGTTGTCTTTTGTGTGGTTGGTCGGTTTGCGTTTCCATGATTGTGCCGCGTTCGAGTCCTGCTGTTACGACATCACCGAGGCGGAGAGTAACAAGGCTATATCAAGGGACGAAGCAGCATTCACCTCCAGCGTGAGCACCCGTACACCGTCCCTGGCGATCGCGCCTCCTCCTGACCGATCGATGCTGTTGTCGCGAGAGGAAGAACTCGTTCCGTGGAGTCGTCTCATCATCACTAAGCAGTTCTACGGAGGCCTGATTTTCCACACCACCTGGGTCACCGGCTTCGTCCTGTTAGGACTCTTGACGCTTTTCGCCAGCCTG…
UL6
ATGAACGGATGGGCTGGGGTGTGCTTGATAACTCACTGTTTGAATACGCGCTCACGCACATATGTAGCACTCAACATGTTAGCTTTTGCCCGCACGCCCCGGGGCGTGCCGAGCTGCCTTTTTAATAAAGTCTGGGTTTCCAGATACGCGCTGGTTCTGATTTTGATGGTTTGTGCCTCTGAAAGCTCTACGAGCTGGGCCGTGACATCCAATGGACTGCCTAACTGTAGCACGGTAACTAGAACAGCGGGTCAAGACGCTGAATTGCACGGTCCGGCACCGTTAAGCTGTAATGTGACCCAGTGGGGACGTTACGAGAATGGAAGCACACCCGTATTATGGTGCACTTTACGGGGATCACGCATGCGAGTCTCATTAGGACACCGTGTAGCGTTTGGC…
UL7
ATGGCTTCTGACGTGGGTTCTCATCCTCTGACGGTTACACGATTCCGCTGCAGAGTGCATTATGTGTACAATAAACTGTTGATTTTAACTTTGTTTGCCCCCGTGATTCTGGAATCCGTCATCTACGTGTCCGGGCCACAGGGAGGGAACGTTACCCTGGTATCCAACTTCACTTCAAACATCAGCGCACGGTGGTTTCGCTGGGACGGCAACGATAGCCATCTCATTTGCTTTTACAAACGTGGAGAGGGTCTTTCTACGCCCTATGTGGGTTTAAGCCTAAGTTGTGCGGCTAACCAAATCACCATCTTCAACCTCACGTTGAACGACTCCGGTCGTTACGGAGCAGAAGGTTTTACGAGAAGCGGCGAAAATGAAACGTTCCTGTGGTATAATTTG…
UL8
ATGGCTTCTGACGTGGGTTCTCATCCTCTGACGGTTACACGATTCCGCTGCAGAGTGCATTATGTGTACAATAAACTGTTGATTTTAACTTTGTTTGCCCCCGTGATTCTGGAATCCGTCATCTACGTGTCCGGGCCACAGGGAGGGAACGTTACCCTGGTATCCAACTTCACTTCAAACATCAGCGCACGGTGGTTTCGCTGGGACGGCAACGATAGCCATCTCATTTGCTTTTACAAACGTGGAGAGGGTCTTTCTACGCCCTATGTGGGTTTAAGCCTAAGTTGTGCGGCTAACCAAATCACCATCTTCAACCTCACGTTGAACGACTCCGGTCGTTACGGAGCAGAAGGTTTTACGAGAAGCGGCGAAAATGAAACGTTCCTGTGGTATAATTTG…
UL9
ATGTCTAAGCGTTTGCAGGTATTTCCATGGATAACAATTTTATTTTACACATCAAAATCCCAGTATTGGAACTATATGACAATACCATGTACCCCTACAGTTGGATACGGCAGTCATAATATTAGCTTGCATCCGCTTAATAACTCATTATTTCAAGACGATGTTTTTGAATGGTACATAGACAAACCAATGGTTACTAACAAGTTATGTCTTTATCAAAGTAATGAACGCATAAAATCCAATCTAGACTCTCCAAATATTATGTGGCAGTGCACAGATAATCGTACACTAATTCTCATGAACTTAACCACAACATACAGTAGAAACTATTATTTTCAATCTTTTAAATATCTCGGACAAGGAGTACCAAAACCGAATAACTTGTGTTATAACGTTAGT…
UL10
ATGCGGCAACTGATTAACCATATCGTGAACCATGATCTTTTCCGATGGTCCGTCGTGACCGCAATGATATTTTACAGATATTCCGAAACCTGTATGGAGGTCACTGTCAGAGTAGGTGATCCAGTTACCCTCGGTAGTGGACATGGTTATCATCCAGGACAAAAAGTACACTGGTATAACCAGTCATGCGTCGGCATCGGCAACGGCGAAAATACGCATCCTATCTGCACCTACGACCCTCCTAAACCTGGTAGACAAAAGACAATGAAAACTACTCCGTTGCCATCACCATTGTTGTACGAGTGTCACAATTCCACATTAAGCATTCTTCATGTAAACGTCTCAGATCCCAGAAACTATTGCAGGCGAAAATGTCCACCAAAGGGTAACTGTGAGTTT…
UL11
ATGCTGTTCAGGTACATTACCTTTCATCGCGAAAAGGTACTTTACCTAACGGCTGCATGCATCTTTGGTGTCTACATCAGCCTCCACGATGCCTGCATACCGGTGGTCGGCAAAATAGGTACCAACGTTACGTTAAACGCGGTAGATGTTCTTCCCCCTCGCGATCAAGTTCGTTGGTCATACGGTCCAGGTGGGCAAGGCTACATGTTATGCATTTTCACTGGCACATCAACAACAACATTTAACAATACGCGCTTTAATTTTTCATGTCTAAGCAATTACAGCCTTCTCCTCATTAACGTTACCACGCAGTATAGCACCACCTATCGTACTATGACATCACTAGACCATTGGCTTCACCAACGACATAACCATGGTTCTCGATGGACTTTAGACACA…
UL13
ATGCTGTGGGCCCACTGCGGTCGCTTCTTGCGTTATCATCTGCTCCCGCTGCTACTGTGTAGACTGCCATTCTTACTCTTTTTTCAGCGGCCGCAGTGGGCCCACGGCTTGGACATTGTCGAGGAGGACGAGTGGCTACGGGAGATACAAGGAGCGACGTACCAGCTGTCCATAGTACGCCAAGCTATGCAGCACGCCGGATTCCAAGTCAGAGCGGCGTCGGTTATGACACGGCGAAACGCCGTTGACCTGGACCGACCGCCGCTTTGGTCTGGATCGCTCCCGCATTTGCCCGTCTACGATGTGCGTTCCCCGCGGCCGTTGAGACCGCCGTCATCACAGCATCACGCCGTATCACCCGAACTGCCGTCGCGAAACGGGATACGTTGGCAGTACCAA…
UL14
ATGGGGGGTGGCCGGCTGCCGCCGCTGTGGCTGCCGCTGCTGATCGCCTGGAGCGAGTGGGGCAACTGCTGTCTCGATGCGCCTCCGGTGGTGCGTTCGCCCTGTCTGCAGCCGGTGCGCGACCGCAACCGCGAGCGGAACCCGGGCTCACCGCAGTTGCTGCCTTACGGCGACCGTCTGGAGGTGGCCTGCATCTTCCCCGCGCACGACTGGCCAGAGGTCTCTATCCGAGTCCACCTCTGCTACTGGCCCGAGATCGTGCGTTCGCTGGTGGTGGACGCACGCAGCGGTCAGGTGTTACACAACGACGCCAGCTGTTACATCGCCGGCGGGCGCTGGCGTTTCGAGGACGGCGGCGCGGCGCAGCGGCTGAGCCTCTCGTTTCGTCTCATCACCGAG…
UL15A
ATGAAGCGGATGATTCGCAGTCACGGCAGGAAAACGGAGTGTCAGATGACGGGCGCCGGCGAGCGACGCGGCTCCGCCGTCGGTGCGCTCATCTGCGGCAGCGGTACCCGACGCGGCAGCGGCGCCAACGAACGCCGCGACTCCGACGTCGGTCCCATCGCCCACAGTAGCGGTACCAGACGCGGTTCGGCGAATGAAACGTCCGCCTGTACGCGGACCGATCACCAGAAGGCGGACATTGGGCTGTGGTTCATGTTTCTGGTTTTTGGACTGTGTTCGTGGTTGGCGATGCGGTATCGCGCACAA
UL16
ATGGAGCGTCGCCGAGGTACGGTACCGCTGGGATGGGTGTTTTTTGTTCTTTGCTTATCTGCCTCTTCCCCGTGTGCTGTTGATCTGGGTAGCAAGTCCTCCAACTCGACCTGCCGCTTGAATGTGACTGAGTTGGCCTCGATCCATCCTGGGGAAACGTGGACGTTACACGGGATGTGTATTTCTATCTGCTACTACGAGAATGTGACCGAGGACGAGATAATCGGCGTGGCTTTTACTTGGCAGCATAACGAGTCTGTGGTTGACCTGTGGTTGTACCAGAACGACACGGTGATCCGCAATTTCAGCGACATCACCACTAACATCTTGCAAGACGGACTGAAAATGCGAACCGTCCCTGTGACTAAACTGTACACCAGCCGCATGGTCACTAATCTT…
UL17
ATGGATCACGCGCTCTTCACACACTTCGTCGGCCGACCCCGTCACTGTCGGTTGGAAATGTTGATTCTGGACGAACAGGTGTCTAAGAGATCCTGGGACACCACGGTTTACCACAGGCGCCGCAAACATCTACCTCGACGTCGCGCTCCGTGCGGCCCCCAGAGGCCCGCCGAGATTCCCAAAAGAAGAAAAAAGGCGGCCGTCCTTCTATTTTGGCACGATTTGTGCTGGCTGTTTCGACGACTTTTCTTTCCTCGGGAGGACTCAGAGCCACTGATGTCGGATCCGGCACGGTCTCCCGAAGAGGAGGAG
UL18
ATGATGACAATGTGGTGTCTGACGTTGTTTGTGCTGTGGATGTTGAGAGTGGTGGGAATGCACGTGTTGCGTTACGGGTACACGGGGATTTTCGATGATACATCGCATATGACGTTGACCGTTGTGGGGATTTTTGACGGGCAACACTTTTTTACCTATCACGTTAATTCCAGCGATAAAGCGTCAAGTCGGGCCAACGGTACCATTTCTTGGATGGCTAACGTCTCGGCGGCCTACCCCACCTACCTGGACGGGGAAAGAGCCAAAGGTGACCTTATTTTTAACCAAACCGAGCAAAACCTGTTAGAGCTGGAAATTGCGTTGGGTTACCGGTCACAGAGCGTGCTGACGTGGACGCACGAGTGTAATACCACGGAAAACGGTAGTTTTGTAGCCGGT…
UL19
ATGACCAGCAACGCCCTGTATGAGCTGTTTCGACGTCGGTTACCGCGTGCCCCCGTCAACACGGTCATGTTTCTCACGCGACGCACTCGTGATGGGTTCTGCGGTCGGTTGACGTCCATCGCCACGAATTCCCACTACACTATGTTCGTGTTAGATCACGGATCCGTGCGCATCGAGCGACCGAGTCAGTCAGAAGTGGATTGCGCCAGTTTAATGGAAACGCTGAAGCGGATTCGGTTACGAAATTCGTGGGTAGCGTCAGAAGACGAGCTAGATGTGAGTCGCAGGGACGCG
UL20
ATGCTCGGGATACGGGCTATGCTGGTGATGCTGGATTACTACTGGATACAGTTGATAACGAACAATGGCACTCGAAGCAACAATACCGATACCATCTTTGTATCTCTCCTTACCGGGCCCAACGGAGTTACTCGCACAGCCATCGGAGGTCTGTATTCAAACTACACCAACTTAACTGGAGCATTTGGCTTCACTTCAACAAATATGTCAGCAACCAACTCTTCCGCTGAGGATAATTGGAGCGTAACCAACCTGACGGAGAGTTGCATCAACCGCGGTGAGTCCTATGTGACTACCATCTGGCTTCTGGACTGCACTAAAAACGATACTTATTGGTACTATGGAAATGCCTACAATCATACATGTGAAGGTACAATTTCGGGATATCTCCTGGGCATG…
UL21A
ATGGGAGGTAGCCCTGTTCCCCAGCTCACCACCGTCACTCAAGGACTCATGCCATCTGTGCGCATGGACTTTCGGGCTCGCCGGCCCTTGCGCCGCTTGGCTTTCTACGCGCCGCGAGCTCGTCGGAGGCTTTTCCAGAATCATATACATCCAGAACAGCGCCGAGTGCTGGTCGGTGAGGGAGATGAAGAGATGTTGCCGGATCTGCCGATGGAGATCGACATCGTCATCGACCGACCTCCGCAGCAACCCCTACCCAATCCGCTGGTGCTACTGCTGGACGATGTTCCCCCCCATGTACCCGGTTTTGCTCCCTACCGCGTCCCCCGTCCCCACCCCATGATTCCCGAAGAACATTGGGACCAGTTT
UL22A
ATGGCTCGGAGGCTATGGATCTTGAGCTTACTAGCCGTGACCTTGACGGTGGCTTTGGCGGCACCTTCTCAGAAATCGAAGCGCAGCGTGACGGTGGAACAACCCAGTACCAGCACTAACTCCGATGGTAATACCACCCCCAGCAAGAACGTAACTCTCAGTCAGGGGGGGTCCACCACCGACGGAGATGAAGATTACTCCGGGGGAGACTATGACGTTTTGATTACGGATACAGATGGAGGTAACCATCAGCAACCACAAGAGAAGACCGACGAACACAAGGGAGAACACACCAAAGAAAATGAAAAGACCCAG
UL23
ATGTCGGTAATCAAGGACTGTTTTCTCAATCTGCTCGACCGCTGGAGGCCTCCTAAGACGTCGCGACCGTGGAAACCCGGGCAACGCGTGGCCCTGGTCTGGCCCAAAGACCGCTGCCTCGTTATCCGGCGTCGCTGGCGCTTGGTGCGCGACGAAGGACGGGATGCACAGCGTCTGGCCAGCTACCTCTGCTGCCCCGAGCCGCTGCGTTTCGTCGGCAGCATCTGCACCTACAACTTTCTTAAACACAAGGGCGATCACAACGTGCCGTCTGAACTGTACCTGGGCGCCTCGGGCGCCATGTACCTATGGACCGACCACATCTACTCTGACTCGTTGACCTTTGTGGCCGAGAGCATCACTGAATTTCTCAACATCGGTTTGCGACGCTGCAACTTC…
UL24
ATGAGCGATCTGGCTAGCCTGGCGCTCACGGCCGAGTTCGGCCTGGGCTGTCTGGAAGCTTACGTGCGCATCAACGCAGGCCAGGTGTTGCCCGTGGTCTGGCCGCCGGGCTGGAACCTAGTGCTGCAGGAGATCGAGACGGACGAGGACTTCAAACCGGAGGACGTGAAGGCTTGGAGTCACTACCTGTGTTGCCAGACGCGCCTGGCCTTCGTGGGTCGCTTCGTGAACGAGGGCGTGTTGTCGCCGGATCAGCAGAAGAAGACCGCTGTGTGCCTCATCTCGGACGAGGGCTATGTTTTTTGCTATGTACGCGAGGACACCGCCGTCTACTACCTGGCCCGCAACCTCATGGAGTTTGCGCGCGTCGGGCTGCGCGCCGTCGAGACCCTGCACTGC…
UL25
ATGTCGTCGCGGCGTCGCAGCTCGTCACGTCGCTCTGGCGAACCCTCGACGGTGATTTATATCCCCTCGAGCAACGAGGACACGCCGGCGGATGAGGAGGCGGAGGACAGCGTTTTCACGAGCACGCGGGCGCGCAGCGCCACGGAAGATCTGGATCGCATGGAGGCCGGTTTGTCGCCCTACAGCGTCTCCTCGGACGCTCCGTCGTCCTTCGAGCTCGTGCGCGAGACCGGCGGCACCGGCGCCGCCAAGAAACCGAGCGAAAAGAAACGATCGTCGTCGCGTCGGCAACCGCAGATCGCAGCGGGCGCGCCTCGGGGCTCGCCGGCGACACCCAAGGCCGGCAAGTCGCCTAAAGTCTCGCGACCGCCTAGTGTGCCCTCGCTGCCCGAGAACGGC…
UL26
ATGACGAGCAGGCGCGCACCCGACGGCGGTTTGAATTTAGACGATTTTATGCGCCGCCAGCGCGGTCGCCACCTGGATCTGCCCTATCCGCGCGGCTACACGTTGTTTGTCTGCGACGTGGAGGAGACCATCCTCACCCCGCGCGACGTAGAATACTGGAAGCTGCTGGTGGTGACCCAGGGTCAGTTGCGCGTCATCGGCACCATCGGACTCGCCAACCTTTTCAGTTGGGACCGCAGCGTGGCCGGCGTGGCGGCCGACGGCAGCGTGCTGTGCTACGAGATCAGCCGTGAGAACTTTGTGGTGCGCGCCGCCGACTCGCTGCCGCAGTTGCTGGAGCGCGGCCTGCTACACAGCTACTTTGAAGACGTGGAGCGCGCTGCGCAGGGCAGACTGCGT…
UL27
ATGAACCCCGTGGATCAGCCGCCACCTCCACCGCTAACCCAGCAGCCGGAGGAGCAGGCTAAAGAAGACCATGACGACGGTGACGAGCGCCTATTTCGCGATCCGCTCACCACGTACGAGTATCTCGACGACTGTCGTGATGATGAGGAGTTTTGTCACCAGTTCCTGCGCGCCTACCTGACGCCGATTCGTAATCGACAGGAGGCTGTGCGCGCCGGCCTGTTGTGTCGCACGCCCGAGGATCTGGCGGCCGCCGGCGGTCAGAAAAGGAAAACGCCGGCGCCCAAACATCCCAAGCACGCCATGGTGTACATTCGCCGCAGCTGTCTGGTCCATTCAGCCTGCGCTACGGCGCACGGCAAGTACGACATCCGCGGTCTGACGCTCGAGTCGGACCTC…
UL29
ATGTCCGGCCGTCGCAAGGGCTGCTCGGCGGCCACGGCGTCTTCCTCCTCGTCGTCGCCGCCGTCGCGCCTTCCTCTGCCTGGGCACGCGCGTCGGCCGCGTCGCAAACGCTGCTTGGTACCCGAGGTCTTTTGCACGCGCGACTTGGCCGACCTGTGCGTGCGACGCGACTATGAGGGCCTGCGGCGTTACTTGCGGCGCTTCGAGGGCTCGTGCGTGTCGCTGGGCTGGCCCTCGCAGTGCATCTACGTGGTCGGGGGCGAGCATTCGCCGCACTCGCTGACTGAGATCGATCTGGAGCACTGCCAGAACGACTTTTTCGGCGAATTCCGAGCTCTGCATCTCATTGGCACGGTCTCGCACGCCACCTGCCGGTACCAGGTGTTCGTGGACGCGTAC…
UL30
ATGACGACATCGGCGATGACGGCTCCTGATACGCGCCGACAGCTGCAGCACGTGGAGACGCTGCGTCGGTTTCTACGCGGCGACAGCTGCTTTGTGCACGATCTCCGGGGCATGATGGACTATCACGACGGGCTCTCGCGCCGTCAACAGCGTGCCTTTTGCCGCGCGGGTCGCGTGTTGACGGACCCGGAGCCCATCCAGAGCGAGACGGAGGGGGAGAATAAACAGTTTACGGAGCACACACACAAAGTAGTCTCGTTTTTTATTAAAAGTGTCTTTGTATTTCCCTGTCTTGTGTTGCCCAACTGCTGTCAGGTCTCCGTAGATCGCTCCCGGGTGCCCGAGACGGGGGGCAGATGGCTA
UL30A
ACGGCGTGCCGTGACGCTCGATGGGTCCGCTTCATCAGACTGCGTACGCTTTGGAGCGTCAGACCCAGGGCGCATGTAGCCGACTTGGAGGACTTTGCCGCCTTTTATCGCACCCTCTCGGACAGTGAGCAGCAGGAGTTCGAGCAAGAAGCCGAACTCGCCTCCCGCTCACAACGCGTGCGAGACCTGCGCGAGGCCCGGCGCCAGCTCAAGATGGACCTGATGTGTCACGGCGGT
UL31
ATGGGGGACAAGCCCACGCTTGTGACCCTGTTGACCGTCGCCGTGTCGTCGCCGCCACCGTCGTCGCCGCTGCCGCTCGTCAGCTTCACGGAGCTGCTGTTACCGCCGCCGTCCGTCGCCGCCGCTGCGGTGGCGGCAACAGCGACGAGCGAGGTGGGCGAGAAAACCGCGGAGCAAGAGGTAGCGGCTGCGGGTCCGGAGACCAGGAATGAGAGAAGAGAAAACAGGGAGGACGAAGGAGGGGAGACGAGGACGACGGGCACCACCGCGGTCAAAAGGTCGCACGACGGTATCCCTCGCCAACTGGCAGAGCGCCTGCGGCTGTGCCGCCACATGGACCCCGAGCAGGACTATCGTCTGCCGGCGCAGGACGTGGTGACCTCGTGGATCGAAGCGCTA…
UL32
ATGAGTTTGCAGTTTATCGGTCTACAGCGGCGCGATGTGGTAGCCCTGGTCAACTTTCTGCGCCATCTCACGCAAAAGCCCGACGTGGATCTCGAGGCACACCCCAAGATCCTGAAAAAATGCGGCGAAAAACGCCTGCACCGGCGTACGGTGCTGTTCAACGAGCTCATGCTTTGGTTGGGATACTACCGCGAGCTGCGTTTCCACAACCCCGACCTTTCCTCGGTGCTCGAGGAGTTCGAGGTGCGTTGCGCGGCCGTGGCGCGTCGCGGCTACACTTACCCGTTCGGTGATCGTGGTAAGGCGCGTGACCACCTGGCTGTGCTAGACCGTACCGAATTCGATACGGACGTGCGCCACGATGCCGAGATCGTGGAGCGCGCGCTCGTAAGCGCGGTC…
UL33
ATGGACACCATCATCCACAACACCACGAACCGCAGTACCGATACTCCGCATGTCAACATCACCTGTAACATAACGGAGCCGCTATCCGCCATCCGTACCACAGAAGCCGTGATCAACACGTTCATCATTTTCGTAGGCGGCCCGCTCAATGCCATAGTGTTGATCACGCAGCTGCTCACGAATCGCGTATTGGGCTATTCAACCCCCACCATCTACATGACCAACCTCTATTCCACCAACTTCCTCACGCTCACCGTACTGCCATTTATCGTGCTGAGCAACCAGTGGCTACTACCCGCTAGCGTGGCTTCGTGCAAATTCTTGTCGGTGATTTACTACTCGAGCTGCACAGTAGGCTTTGCCACCGTAGCCCTGATCGCCGCCGACCGATACCGCGTT…
UL34
ATGAACTTCATCATCACCACCCGAGACTTCTCCAACGACGATTCAGTCCTGCGAGCCGCCGAGATGCGTGACAACGTGGCAGGCTCGATTTCCAAAGCGTACAAGGGCACGGTACGCGCCGAAGGCAAGAAGAAGCTGCTGCTGAAGCACTTGCCCGTGCCGCCCGGCGGCTGCTCGCGCCGCAACAGCAACCTCTTCGTTTTCTGCACCGAGCGCGACTACCGCAAGTTCCACCAGGGCATCGCACAGCTCAAGCGCGCGCCGGCCGAACTGGACCCCCACGAGATCCAGCAAGTCACGGCCAGTATCCGCTGCCGCCTGCAGCCCAGTCTCCGCGAGCCGCCCACGCCGGCCGACGAGCTGCAGACGGCTGTGTCGCGCGTGTGCGCGCTCTTCAAC…
UL35
ATGGCCCAGGGATCGCGAGCCCCATCGGGCCCGCCACTGCCCGTTCTCCCCGTGGACGACTGGCTCAACTTTCGGGTTGACCTGTTTGGAGACGAGCACCGGCGCCTGCTGCTCGAGATGTTGACCCAGGGCTGCTCCAACTTTGTGGGGCTGCTCAACTTTGGCGTGCCCAGCCCCGTATACGCACTCGAGGCCTTGGTGGACTTCCAGGTGCGCAACGCTTTTATGAAGGTGAAGCCCGTGGCCCAGGAGATTATCCGTATCTGCATTCTCGCTAACCACTACCGCAACAGCCGCGACGTATTGCGGGACCTGCGCACGCAGCTCGACGTGCTGTACTCGGAGCCGCTTAAGACGCGGCTGCTTAGAGGGCTCATCCGACTCTGCCGCGCTGCGCAA…
UL36
ATGGACGACCTACGGGACACGCTGATGGCCTACGGCTGCATCGCCATCCGAGCCGGGGACTTCAACGGTCTCAACGACTTTCTGGAGCAGGAATGCGGCACCCGGCTGCACGTGGCCTGGCCCGAACGCTGCTTCATCCAGCTCCGTTCGCGCAGCGCCCTGGGGCCCTTCGTGGGCAAGATGGGCACCGTCTGTTCGCAAGGTGCTTACGTCTGCTGTCAGGAGTACCTGCACCCCTTTGGCTTCGTCGAGGGTCCGGGCTTTATGCGCTACCAACTCATCGTGCTCATCGGGCAGCGCGGCGGCATCTACTGCTACGATGACCTGCGCGACTGCATCTACGAGCTGGCGCCCACCATGAAGGATTTTCTGCGGCATGGCTTTCGTCACTGCGACCAC…
UL37
ATGTCTCCAGTCTACGTGAATCTGTTAGGTAGCGTGGGCCTGCTGGCCTTTTGGTACTTTAGCTACCGCTGGATCCAGCGAAAACGCCTTGAAGATCCTCTCCCGCCTTGGTTAAGAAAGAAAAAAGCATGTGCGCTCACCCGGCGTTCTCGGCACCGGTTACGCCGCCAACATGGCGTAATTGACGGTGAGAACTCGGAGACCGAGCGGTCCGTGGACTTGGTGGCCGCGCTCTTGGCCGAGGCCGGGGAGGAGAGCGTAACGGAGGACACAGAGCGGGAGGACACGGAGGAGGAAAGGGAGGATGAAGAAGAAGAAAACGAGGCTCGGACGCCCGAGGTGAACCCCATGGACGCCGAGGGCCTCTCAGGACTTGCGCGAGAAGCCTGCGAGGCTCTC…
UL38
ATGACTACGACCACGCATAGCACCGCCGCTATCATGAGCCTGCTGGACGAGGCCGAGTGGCGACAGACGCAGATGGACGTGGGGGGACTGATCCAGGCGTCGGCGTTGGGCAAGGTGGCGCTTCGCTACGCGGTGAGGAAACTGATGAAGCGCGGAGCCAGGCTGCGGCACGACTCGGGTCTCTACGTGTGCATCTGCGACCCCTCTTACGAGTTTCTGCAGATGAACCTGAGCAAGATCAGTTGGCTGGAGCGACACTGCCCCCCGTTGGACCAGGAGCTCATCATGTTCGGGGTCATCGAGGCCTGGGAGGAAGCTTCGGTGCGGCCCACGCGTCAGCTGGTGTTGTTCATGACGCCCAAGTGGGACGTGTTCGCCTACGACTCCGGTATCCTGTTT…
UL40
ATGAACAAATTCAGCAACACTCGTATCGGCTTCACTTGCGCGGTTATGGCTCCGCGGACTTTAATTCTGACGGTTGGACTCCTGTGTATGAGGATCAGGAGTTTATTGTCTTCTCCTGTCGAGACGACGGTAACAACCGCCGGCGTGACGTCCGCTCACGGTCCGCTATGTCCGCTCGTGTTCCAGGGTTGGGCGTACGCCGTGTACCACCAAGGCGACATGGTCCTCATGACGCTCGACGTGTACTGCTGCCGCCAGACCTCCAGCAACACCGTCGTCGCGTTCTCGCATCATCCTGCCGATAACACGTTGCTGATCGAAGTGGGTAACAACACGCGTCGCCACGTAGACGGAATCTCCTGTCAGGACCATTTTCGCGCGCAACACCAGGATTGCCCG…
UL41A
ATGACACTCTTTTGCCGCACCGCCAACAGCACCGCCGGCTACGTCGACATGAACGTCTGCATCGGCATGATCGGCGTGGTTTGTTTCGTTTTCGGGGTCTTTATTCTCATCTTTTGCTCCACGTTGAAAGCTTTCTACGTGCGGCAAAAGACTTACCACCTCCTGGGTACCGAGTCGGACGACGAGGAGACCACGGTTTGGGAAAAGCGCCGGATGGAGTCGGATACAGACTTT
UL42
ATGGAGCCCACGCCGATGCTCCGCGACCGGGATCACGACGACGCGCCCCCCACCTACGAGCAGGCCATGGGTCTGTGCCCGACGACGGTTTCCACGCCACCGCCGCCACCACCCGACTGCAGCCCACCGCCCTATCGACCCCCGTACTGCCTGGTTAGTTCGCCGTCGCCGCGACACACGTTCGACATGGATATGATGGAAATGCCCGCCACCATGCATCCCACCACGGGGGCGTACTTTGACAACGGCTGGAAATGGACTTTTGCTCTCTTAGTGGTCGCTATATTAGGGATCATTTTCTTGGCCGTGGTGTTCACCGTGGTGATTAACCGGGACAGTGCCAATATAACAACGGGGACGCAAGCATCATCGGGG
UL43
ATGGAGAAAACGCCGGCGGAGACGACGGCGGTTTCAGCTGGCAACGTGCCACGTGACTCAATTCCGTGTATAACTAACGTGTCCGCGGACACCCGCGGCCGTACCCGCCCCAGCAGACCAGCCACCGTCCCTCAGCGACGTCCCGCGCGGATCGGACACTTTAGGCGGCGCAGCGCCAGCCTTAGCTTTCTTGACTGGCCGGACGACAGCGTCACAGAGGGCGTTCGGACGACCTCCGCGTCGGTCGCCGCCTCCGCGGCCCGTTTCGACGAAATCCGGCGGCGCCGCCAGAGCATCAACGACGAGATGAAGGAACGCACGCTGGAGGACGCGCTGGCTGTCGAGCTGGTCAACGAGACCTTCCGCTGCTCTGTCACCTCCGACGCCCGCAAGGACTTG…
UL44
ATGGATCGCAAGACGCGCCTCTCGGAGCCGCCGACGCTGGCGCTGCGGCTGAAGCCGTACAAGACGGCTATCCAGCAGCTGCGATCTGTGATCCGTGCGCTCAAGGAGAACACCACGGTTACCTTCTTGCCCACGCCGTCGCTTATCTTGCAAACGGTACGCAGTCACTGCGTGTCAAAAATCACTTTTAACAGCTCATGCCTCTACATCACTGACAAGTCGTTTCAGCCCAAGACCATTAACAATTCCACGCCGCTGCTGGGTAATTTCATGTACCTGACTTCCAGCAAGGACCTGACCAAGTTCTACGTGCAGGACATCTCGGACCTGTCGGCCAAGATCTCCATGTGCGCGCCCGATTTCAATATGGAGTTCAGCTCGGCCTGCGTGCACGGCCAA…
UL45
ATGAATCCGGCTGACGCGGACGAGGAACAGCGGGTGTCCTCGGTGCCCGCACATCGGTGCCGGCCAGGTAGGATTCCAAGCCGCAGCGCGGAAACCGAGACGGAGGAATCGTCGGCAGAGGTCGCCGCTGATACTATCGGGGGAGATGACAGCGAGCTCGAGGAGGGGCCGCTGCCCGGGGGTGACAAGGAAGCGTCCGCTGGAAATACCAACGTATCGAGCGGTGTAGCATGTGTAGCGGGTTTTACGAGTGGTGGCGGCGTCGTCAGTTGGCGTCCCGAGTCGCCGTCTCCCGACGGCACGCCGTCTGTGCTGTCGTTGACGCGTGACAGCGGTCCCGCCGTGCCCAGTCGCGGTGGACGCGTGAGTAGCGGTCTGAGCACCTTTAATCCGGCCGGC…
UL46
ATGGACGCGCGCGCGGTGGCCAAACGGCCGCGCGACCCGGCCGACGAGGACAATGAACTAGTGACGGCGCTCAAAGCCAAACGCGAGGTAAATACTATATCGGTTCGCTATCTCTACCACGCCGATCACCAGGCGCTCACGGCGCGTTTCTTCGTGCCCGAGGGCCTGGTAGAGTTCGAGGCGCAGCCGGGCGCGCTGCTCATCCGCATGGAGACGGGTTGCGACTCGCCGCGACACCTCTACATTAGCCTTTACCTGTTAGGCATTCGCGCCTCCAACGTCTCGGCCAGCACGCGCTGCCTGCTCGAAAGCGTGTACACGGCCTCGGCCGCGCGCGCCGCGCTGCAGTGGCTGGACCTGGGCCCGCATCTGCTGCACCGCCGCCTCGAGACGCTGGGC…
UL47
ATGATGGCGAGGCGCACGGTAGATTTCAAAAAGTTGATAGAGCAGCTGCGGGCACGGGCCACGGACAAAGCGGAGGCGTTAAATACCGTGAGCCAATTGGAGATCGGCGCGGTGGATGCCCAGGACGTGACCGCGAGCGCCGTGCGCGCCTTCGTGGGTGCGTTGCCGAGCTCGGGCTACCACTTTGGCTTCGTGCGTCAGAACGTGGTCTTTTACCTCCTAAGCCACGCCACGGTACAGACGGCGCGCGACCCGCTGTACGCCGCCGAGCAGTTGCACGAACAGCTGGACCGCTTCCTGCGACACCAGCACGACGGCGGCGGAGACGAGGACCGGTTGCCGTTCTACCACAACGGGGCCACGCTGACGGCTTTCCAGAAGCTGTTGCAGACCCTGCGC…
UL48-H1
ATGAAAGTCACACAGGCCAGCTGCCACCAGGGCGACATCGCTCGCTTTGGAGCGCGAGCGGGCAATCAATGCGTCTGCAACGGCATCATGTTCCTACACGCCTTGCACCTGGGTGGAACGAGCGCCGTCCTGCAGACCGAGGCGCTGGACGCCATCATGGAAGAGGGCGCGCGTCTGGACGCGCGGCTAGAGCGCGAGTTGCAAAAGAAGCTGCCCGCCGGCGGGCGGCTGCCGGTCTACAGACTGGGCGACGAAGTGCCGCGCCGCCTGGAGTCGCGGTTCGGCCGGACCGTGCACGCGCTCTCGCGGCCCTTCAACGGCACCACCGAGACGTGCGACCTGGACGGCTACATGTGTCCGGGCATCTTCGACTTTCTGCGGTACGCGCACGCCAAACCG…
UL48-H2
ATGAACCCACGGAAACCGCAGGCGACGACTTCGCTGGGCGCCTTTACACGCGGGTTGAACGCACTGGAACGACACGTCCAGCTGGGTCACCAGTATCTGCTCAACAAGCTCAACGGCTCATCGCTAGTCTATAGGCTGGAAGACATTCCTAGCGTGCTTCCGCCAACACACGAGACCGACCCCGCGCTGATCATGCGCGACCGCCTGCGTCGTCTATGCTTCGCGCGTCACCACGACACCTTTCTTGAAGTGGTAGACGTCTTCGGCATGCGGCAAATCGTCACGCAGGCCGGCGAGCCCATTTACCTGGTCACCGATTACGGCAACGTAGCCTTTAAGTACTTGGCGCTGCGAGACGATGGCCGACCCCTGGCATGGCGGCGCCGCTGTAGCGGCGGA…
UL48A
ATGTCTAACACCGCGCCGGGACCCACGGTGGCCAACAAGCGGGACGAAAAACACCGTCACGTCGTCAACGTCGTTTTGGAGTTGCCGACCGAGATCTCAGAGGCCACCCACCCGGTGCTGGCCACCATGCTGAGCAAGTATACGCGCATGTCCAGTCTGTTTAACGACAAGTGCGCCTTTAAGCTGGACCTGTTGCGCATGATAGCCGTGTCGCGCACCCGACGC
UL49
ATGGCCAATCGTCGTCTCCGACACGCTCCGCACACCGCGACTGATGAGTTCCACCAGGCTCTGCGCCGTCTCTTCGCGCCCCTCTGCGTTCACGAGGACCATTTCCATGTGCAGCTGGTGATCGGCCGCGGTGCGCTGCAGCCGGAGGAAGCGGCGGTAGAAACGTCGCAGCCACCGGCGCAGTTTGCGGCGCAGACGTCGGCGGTCCTCCAGCAGCAGCTGGTGCATCACGTGCCACGTTCTTGCGTCCTTCATCTCTTCGTGACGGATAAGCGCTTTCTGAATCGCGAGCTGGGCGACCGTCTCTACCAACGCTTCCTGCGCGAATGGCTGGTGTGTCGGCAGGCCGAGCGGGAGGCGGTGACGGCGCTCTTTCAGCGTATGGTTATGACCAAGCCC…
UL50
ATGGAGATGAACAAGGTTCTCCATCAGGATCTGGTGCAGGCCACGCGGCGTATCCTCAAGTTGGGTCCTAGCGAGCTGCGCGTCACCGACGCCGGCCTTATCTGTAAAAATCCCAATTACTCGGTGTGCGACGCCATGCTCAAGACAGACACGGTCTATTGTGTCGAATATCTGCTCAGCTACTGGGAGAGCCGCACAGACCACGTGCCTTGTTTTATCTTTAAAAACACTGGCTGCGCCGTCTCCCTCTGCTGTTTTGTGCGAGCGCCCGTCAAGCTCGTCTCGCCGGCGCGCCACGTAGGTGAGTTCAATGTGCTTAAGGTGAACGAGTCGCTCATCGTCACGCTCAAGGACATCGAGGAGATCAAGCCCTCGGCCTACGGAGTGCTGACGAAGTGC…
UL51
ATGTCCTGGGCTAAGCAGCGGGTGCCGTTTCTGGACGATGACGACGGAGAGGAGGAAAACGACGTGCAGGATGACGTGGATTCTCCGGTGCCGACGCGACCGCTGGTGATCGACGAGGACGCGGAGCCCGCGGCTGGTACGAGCGGTGGGCTCGAGGGGGGAGGTGGTGACGACGAGGACGGTGAAGACGGACACGCGCTACCCGATCTTGACGACGATCTGCTATTACAGTTCGAGCCGATGCTGCCGCGCGTCTACGATCTGTTGCTGCCCTCTCTGGACGCGCGCTTAAATTTCGTGAACGCGGGTCAGAAGTACGCCGCCTTCCTCAAGTACGTGCACGGCGACTGCGCGACCTGCAGTCACGGAGAGATCCTCCGTGAGAAGACGCAACTATTA…
UL52
ATGAATCCGAGTACCCACGTGAGCAGTAACGGCCCAACGACTCCCCCTCACGGGCCCCACACCACGTTTCTTCCCCCGACCAGCCCGGCCCCGTCCACCAGCTCCGTCGCCGCCGCTACCTTGTGCAGTCCGCAACGACAGGCCGTTTCGCGTTACAGCGGCTGGAGCACCGAGTACACCCAGTGGCACTCGGACTTGACAACTGAGCTGCTATGGCACGCGCACCCGCGTCAAGTACCTATGGACGAAGCGCTGGCCGCCGCGGCGGCCGCCTCATACCAGGTGAATCCTCAACACCCCGCCAACCGTTACCGTCACTACGAATTCCAGACGCTCAGCCTCGGCACCTCGGAGGTAGACGAACTGCTCAACTGCTGTGCGGAAGAAACCACGTGCGGC…
UL53
ATGTCTAGCGTGAGCGGCGTGCGCACGCCGCGCGAACGACGCTCGGCCTTGCGCTCCCTGCTCCGCAAGCGCCGCCAACGCGAGCTGGCCAGCAAAGTGGCGTCAACGGTGAACGGCGCTACGTCGGCCAACAACCACGGCGAACCGCCGTCGCCGGCCGACGCGCGCCCGCGCCTCACGCTGCACGACCTGCACGACATCTTCCGCGAGCACCCCGAACTAGAGCTCAAGTACCTCAACATGATGAAGATGGCCATCACGGGCAAAGAGTCCATCTGCTTACCCTTCAATTTCCACTCGCACCGGCAGCACACCTGCCTCGACATCTCGCCGTACGGCAACGAGCAGGTCTCGCGCATCGCCTGCACTTCGTGCGAGGACAACCGCATCCTGCCCACC…
UL54
ATGTTTTTCAACCCGTATCTGAGCGGCGGCGTGACCGGCGGTGCGGTCGCGGGTGGCCGGCGTCAGCGTTCGCAGCCCGGCTCCGCGCAGGGCTCGGGCAAGCGGCCGCCACAGAAACAGTTTTTGCAGATCGTGCCGCGAGGCGTCATGTTCGACGGTCAGACGGGGTTGATCAAGCATAAAACGGGACGGCTGCCTCTCATGTTCTATCGAGAGATTAAACATTTGTTGAGTCATGACATGGTTTGGCCGTGTCCTTGGCGCGAGACCCTGGTGGGTCGCGTGGTGGGACCTATTCGTTTTCACACCTACGATCAGACGGACGCCGTGCTCTTCTTCGACTCGCCCGAAAACGTGTCGCCGCGCTATCGTCAGCATCTGGTGCCTTCGGGGAACGTG…
UL55
ATGGAATCCAGGATCTGGTGCCTGGTAGTCTGCGTTAACTTGTGTATCGTCTGTCTGGGTGCTGCGGTTTCCTCATCTTCTACTCGTGGAACTTCTGCTACTCACAGTCACCATTCCTCTCATACGACGTCTGCTGCTCACTCTCGATCCGGTTCAGTCTCTCAACGCGTAACTTCTTCCCAAACGGTCAGCCATGGTGTTAACGAGACCATCTACAACACTACCCTCAAGTACGGAGATGTGGTGGGGGTCAATACCACCAAGTACCCCTATCGCGTGTGTTCTATGGCCCAGGGTACGGATCTTATTCGCTTTGAACGTAATATCGTCTGCACCTCGATGAAGCCCATCAATGAAGACCTGGACGAGGGCATCATGGTGGTCTACAAACGCAACATC…
UL56
ATGGAGATGAATTTGTTACAGAAACTATGCGTAGTGTGTTCGAAATGCAACGAATACGCCATGGAGCTGGAGTGTCTAAAGTACTGCGATCCGAACGTGTTACTGGCGGAGTCCACGCCGTTCAAGAGAAACGCGGCGGCTATAGTGTATCTGTACCGGAAGATCTACCCGGAGGTGGTGGCGCAGAATCGTACGCAGAGTTCGCTGCTGACTCTCTATCTGGAGATGCTGCTGAAGGCGCTGCACGAGGATACGGCTTTGCTGGATCGGGCGCTGATGGCCTACTCGCGCCAGCCGGACCGGGCGGCCTTCTACCGTACCGTCCTCCGTTTGGATCGCTGCGATCGCCATCACACCGTGGAGCTCCAGTTTACGGACAACGTCCGTTTCAGCGTCAGT…
UL57
ATGAGCCACGAGGAACTAACCGCGCTAGCGCCGGTGGGGCCCGCGGCTTTTCTCTACTTCAGCAGGTTGAACGCAGAAACGCAGGAGATTCTGGCCACTCTCTCGCTATGCGACCGTTCCTCGAGCGTGGTGATCGCTCCTCTGTTGGCGGGGCTCACGGTGGAGGCGGATTTCGGCGTCTCTGTGCGTACGCCTGTGCTTTGTTACGACGGCGGGGTGCTCACGAAAGTCACGTCCTTCTGTCCTTTTGCGCTCTACTTTCATCATACGCAAGGCATCGTGGCTTTTACCGAGGATCACGGAGACGTGCATCGGCTGTGCGAGGACGCCCGCCAGAAGTACGCGTTGGAGGCCTACACGCCCGAGGCGGATCGCGTGCCTACCGATCTGGCGGCGTTG…
UL69
ATGGAGCTGCACTCACGCGGCCGTCACGACGCTCCGTCGTTATCTTCCCTGAGCGAGCGCGAACGCCGCGCCCGTCGCGCACGGCGCTTCTGTCTGGATTACGAACCCGTGCCACGGAAGTTCCGACGCGAGCGAAGTCCAACCTCGCCGTCGACACGGAACGGAGCAGCCGCCAGCGAATACCATCTCGCGGAAGATACCGTCGGCGCCGCCTCGCATCATCACCGACCCTGCGTCCCCGCACGACGACCCCGCTACAGCAAAGACGATGATACCGAAGGCGATCCGGACCACTATCCTCCTCCCCTTCCACCCTCCTCCCGCCACGCACTCGGGGGCACCGGCGGACACATCATCATGGGCACTGCGGGCTTCCGTGGCGGACATAGGGCGTCCTCC…
UL70
ATGACGCTCGTTCTGTTCGCAACAGAGTATGATTCTGCTCATATAGTCGCCAACGTACTCTCGCAGACACCGACGGACCACTGCGTCTTCCCCCTGCTGGTCAAACACCAGGTCTCGCGACGTGTTTATTTCTGCCTACAGACGCAAAAGTGCTCGGACTCGCGGCGGGTGGCGCCCGTCTTCGCCGTGAACAACGAAACGCTGCAACTCTCGCGCTACCTGGCCGCGCGCCAGCCCATCCCCCTCTCGGCGCTCATCGCCAGTCTGGACGAGGCCGAGACGCGGCCGCTCTACCGGCATCTCTTCCGCACGCCCGTGCTCTCGCCCGAACACGGCGGCGAGGTGCGCGAATTCAAGCACCTGGTGTACTTTCACCACGCGGCCGTGCTACGTCATCTC…
UL71
ATGCAGCTGGCCCAGCGCCTGTGCGAGCTGCTGATGTGCCGTCGCAAAGCCGCGCCTGTGGCCGATTACGTGCTGCTGCAGCCTAGCGAGGACGTGGAGCTGCGCGAGCTGCAGGCGTTTCTGGACGAGAACTTTAAGCAGCTGGAGATCACCCCGGCCGACCTGCGAACCTTTTCTCGCGACACGGACGTGGTGAACCACCTGCTGAAGCTGCTGCCGCTCTATAGGCAATGCCAGAGCAAGTGCGCGTTCCTCAAGGGCTATCTCTCGGAGGGCTGTTTGCCTCACACGCGGCCGGCGGCCGAGGTGGAGTGCAAGAAATCGCAGCGTATCCTAGAGGCCCTGGACATTCTCATCCTCAAACTGGTGGTGGGCGAGTTTGCCATGTCCGAGGCCGAC…
UL72
ATGCTTACGATGTTAACCGACCGAATCGACTCTCAACTGGTACTGTCGCGGCTGCCGCGCTCCCGTTTTCAGCGATTCTGGGAGACCCCTACGTTAATAATGAAGGAAGAGTCCGCACCGTCATCAGGCTCCATCATCCTAGCCGAGAAATCCGTCAATATGCGTTACTGCGTGCGTTTCGCTAGCGATAGCGATTTTCAAACCACATTTACGCTGCCCCAATCGACCGAGGAGAAATACGACAAAGAGCAGCATCCGGGAGAGGATGAAGCGTCGTCGCCATTACCGTCGCCGCTCAAAGTTCCCTACAAGTGGATGCCTTCCAGTTTCATCGTCAAACAATGCCACACGCAGCTGGCCTTTTACAATAAACACATCATTTGGCTATCACGCGAGCGC…
UL73
ATGGAGTGGAACACACTAGTATTAGGTCTTTTGGTTTTATCGGTAGTGGCAAGTTCCAACAATACGTCGACTGCTAGCACACCGCGTCCCTCTAGTTCTACTCACGCCTCAACAACCGTGAAGGCAACGACTGTTGCGACAACTAGTACAACTACGGCGACAAGTACTTCATCGACGACTAGTGCCAAACCTGGTTCCACTACTCACGACCCCAACGTGATGAGACCACATGCTCACAATGATTTTTACAATGCGCATTGTACATCGCATATGTATGAGCTTTCACTGTCCAGCTTTGCAGCCTGGTGGACTATGCTTAACGCTCTCATTCTGATGGGAGCTTTTTGTATCGTATTACGACATTGCTGCTTCCAGAACTTTACTGCGACCACCACCAAA…
UL74 (CODON OPTIMISED)
ATGGGCAAGAAAGAAATGATCATGGTCAAGGGCATCCCCAAGATCATGCTGCTGATTAGCATCACCTTTCTGCTGCTGTCCCTGATCAACTGCAACGTGCTGGTCAACAGCCGGGGCACCAGAAGATCCTGGCCCTACACCGTGCTGTCCTACCGGGGCAAAGAGATCCTGAAGAAGCAGAAAGAGGACATCCTGAAGCGGCTGATGAGCACCAGCAGCGACGGCTACCGGTTCCTGATGTACCCCAGCCAGCAGAAATTCCACGCCATCGTGATCAGCATGGACAAGTTCCCCCAGGACTACATCCTGGCCGGACCCATCCGGAACGACAGCATCACCCACATGTGGTTCGACTTCTACAGCACCCAGCTGCGGAAGCCCGCCAAATACGTGTACAGC…
UL74A
ATGGCGTTAACCAGAGGAGGAGACCCCGCACCGTCCGTCTGCCTTGTGGTTTGGTTTGCCTGCGTGTACTCACTGCTGATTCTGGTCGTTTTGCTGCTCATCTACCGTTGTTGCATCGGCTTCCAAGACGACCTAGTCTCCCGCACCTTGGCTGTGTACCGAGCTTGTATACAGGGCCCGATATGTAACCAAACCCACAACAGTACCTCG
UL75
ATGCGGCCAGGCCTCCCCTCCTACCTCATCATCCTCGCCGTCTGTCTCTTCAGCCACCTACTTTCGTCACGATATGGCGCAGAAGCCGTATCCGAACCGCTGGACAAAGCGTTTCACCTACTGCTCAACACCTACGGGAGACCCATCCGCTTCCTGCGTGAAAATACCACCCAGTGTACCTACAACAGCAGCCTCCGTAACAGCACGGTCGTCAGGGAAAACGCCATCAGTTTCAACTTTTTCCAAAGCTATAATCAATACTATGTATTCCATATGCCTCGATGTCTTTTTGCGGGTCCTCTGGCGGAGCAGTTTCTGAACCAGGTAGATCTGACCGAAACCCTGGAAAGATACCAACAGAGACTTAACACTTACGCGCTGGTATCCAAAGACCTGGCC…
UL76
ATGCCGTCCGGGTGTGGGGACGACGCTGATTCGACGGGGAACGCTCTGCGGAGATTGCCTCACGTGCGTAAGCGGATCGGTAAGCGCAAGCACCTGGACATCTACCGTCGCCTGCTGCGGGTCTTTCCCTCGTTTGTGGCGCTCAACCGCCTGTTGGGAGGCCTTTTCCCACCCGAGTTGCAAAAGTACCGTCGCCGTCTTTTCATCGAAGTACGATTAAGTCGGCGGATTCCCGACTGCGTGTTGGTGTTTTTACCGCCGGACTCTGGGTCACGCGGCATCGTGTATTGCTACGTGATTGAGTTCAAAACCACGTACTCAGACGCCGACGATCAGTCCGTGCGGTGGCACGCCACCCACAGCCTGCAGTACGCCGAGGGCCTGCGCCAGCTCAAGGGC…
UL77
ATGAGTCTGTTGCACACCTTTTGGCGGCTACCCGTCGCCGTCTTCTTCGAGCCGCACGAGGAAAACGTGCTGCGCTGCCCCGAGCGCGTGCTTCGGCGGTTGCTGGAGGACGCGGCGGTGGCAATGCGCGGCGGGGGCTGGCGCGAGGACGTGCTCATGGACCGGGTGCGCAAACGGTATCTGCGTCAGGAGCTGAGGGATCTGGGTCACAGGGTACAGACTTACTGCGAGGATCTCGAAGGGCGCGTGTCCGAGGCGGAGGCGCTGTTGAACCAGCAGTGCGAGCTCGACGAAGGACCGTCGCCGCGGACGCTGCTACAACCACCGTGTCGTCCGCGTTCGTCGTCCCCAGGGACCGGCGTGGCAGGAGCTTCCGCCGTCCCACACGGTCTTTATAGT…
UL78
ATGTCCCCTTCTGTGGAGGAGACTACCTCAGTCACCGAGTCCATCATGTTCGCTATCGTGAGTTTCAAACACATGGGCCCGTTCGAAGGCTACTCTATGTCGGCCGATCGCGCCGCCTCGGATCTACTCATCGGCATGTTCGGCTCCGTTAGCCTGGTCAACCTGCTGACTATCATCGGTTGCCTCTGGGTGTTGCGTGTTACGCGGCCGCCCGTGTCCGTGATGATTTTTACTTGGAATCTGGTACTTAGTCAGTTTTTTTCCATCCTGGCCACCATGTTGTCCAAGGGTATCATGCTGCGTGGCGCTCTAAATCTCAGCCTCTGTCGCTTAGTGCTCTTTGTCGACGACGTGGGCCTATATTCGACGGCGTTGTTTTTCCTCTTTCTGATACTGGAT…
UL79
ATGATGGCCCGCGACGAAGAGAACCCCGCCGTCCCGCGGGTCCGCACGGGCAAATTCTCCTTTACTTGCGCCAATCATCTAATATTACAGATTAGCGAGAAGATGTCGCGCGGACAGCCGCTGAGCTCGCTGCGTTTGGAAGAACTCAAGATCGTACGCCTCATCTGCGTCCTCCTCTTTCACCGCGGTCTCGAAACGCTGCTACTGCGCGAAACCATGAACAACCTGGGTGTCTCGGACCACGCCGTGCTTAGTCGCAAGACGCCGCAACCCTACTGGCCTCATCTGTACCGCGAACTGCGCCAGGCCTTCCCGGGGCTGGACTTTGAGGCGGCCGTGTTCGATGAAACGCGCGCCGCCCGTCTCAGCCAGCGCCTATGTCACCCGCGCTTGAGCGGC…
UL80
ATGACGATGGACGAGCAGCAGTCGCAGGCTGTGGCGCCGGTCTACGTGGGCGGCTTTCTCGCCCGCTACGACCAGTCTCCGGACGAGGCCGAATTGCTGTTGCCGCGGGACGTAGTGGAGCACTGGTTGCACGCGCAGGGCCAGGGACAGCCTTCGTTGTCGGTCGCGCTCCCGCTCAACATCAACCACGACGACACGGCCGTTGTAGGACACGTTGCGGCGATGCAGAGCGTCCGCGACGGTCTTTTTTGCCTGGGCTGCGTCACTTCGCCCAGGTTTCTGGAGATTGTACGCCGCGCTTCGGAAAAGTCCGAGCTGGTTTCGCGCGGGCCCGTCAGTCCGCTGCAGCCAGACAAGGTGGTGGAGTTTCTCAGCGGCAGCTACGCCGGCCTCTCGCTC…
UL80.5
ATGTCGCACCCTCTGAGTGCTGCGGTTCCCGCCGCTACGGCTCCTCCAGGTGCTACCGTGGCAGGTGCGTCGCCGGCTGTGTCGTCTCTAGCGTGGCCTCACGACGGAGTTTATTTACCCAAAGACGCTTTTTTCTCGCTACTTGGGGCCAGTCGCTCGGCAGCGCCCGTCATGTATCCCGGCGCCGTAGCGGCCCCTCCTTCTGCTTCGCCAGCACCGCTGCCTTTGCCGTCTTATCCCGCGTCCTACGGCGCCCCCGTCGTGGGTTACGACCAGTTGGCGGCACGTCACTTTGCGGACTACGTGGATCCCCATTATCCCGGGTGGGGTCGGCGTTACGAGCCCGCGCCGTCTTTGCATCCGTCTTATCCCGTGCCGCCGCCACCATCACCGGCCTAT…
UL82
ATGTCTCAGGCATCGTCCTCGCCCGGTGAGGGACCCTCGTCGGAAGCGGCCGCGATCAGCGAGGCCGAAGCCGCCAGCGGAAGCTTTGGTCGCCTGCACTGCCAGGTGCTTCGGCTCATCACCAACGTGGAAGGCGGCTCGCTGGAAGCCGGTCGTCTGCGACTCCTGGACCTGCGTACCAACATAGAGGTGAGCCGGCCCTCGGTTCTCTGCTGTTTTCAGGAGAACAAATCTCCGCACGACACCGTAGACCTGACCGACTTAAACATCAAGGGCCGCTGCGTGGTGGGCGAACAGGACCGACTGCTGGTGGACCTCAACAACTTTGGCCCACGACGCCTGACGCCAGGCTCAGAAAACAACACGGTCTCGGTACTGGCCTTTGCGCTGCCGCTGGAC…
UL83
ATGGAGTCGCGCGGTCGCCGTTGTCCCGAAATGATATCCGTACTGGGTCCCATTTCGGGGCACGTGCTGAAAGCCGTGTTTAGTCGCGGCGATACGCCGGTGCTGCCGCACGAGACGCGACTCCTGCAGACGGGTATCCACGTACGCGTGAGCCAGCCCTCGCTGATCCTGGTGTCGCAGTACACGCCCGACTCGACGCCATGCCACCGCGGCGACAATCAGCTGCAGGTGCAGCACACGTACTTTACGGGCAGCGAGGTGGAGAACGTGTCGGTCAACGTGCACAACCCCACGGGCCGAAGCATCTGCCCCAGCCAAGAGCCCATGTCGATCTATGTGTACGCGCTGCCGCTCAAGATGCTGAACATCCCCAGCATCAACGTGCACCACTACCCGTCG…
UL84
ATGCCACGCGTCGACCCCAACCTTCGGAATCGGGCCCGTCGGCCACGAGCCAGACGAGGCGGCGGCGGTGGCGTTGGCAGCAATAGCAGCCGACACAGCGGCAAATGCCGCCGCCAACGCCGAGCTCTGTCGACGCCGCCGCTCACTTTCCTCGCCACCACTACCACCACGACCATGATGGGTGTCGCCAGTACCGACGACGACAGTCTCCTCCTGAAAACGCCGGACGAGCTGGACAAGCACAGCGGCTCACCGCAGACCATCCTCACACTGACGGATAAACACGACATCCGTCAGCCTCGGGTGCACCGCGGCACCTACCATCTGATCCAGTTGCACCTCGACCTCCGACCCGAAGAATTGCGGGATCCCTTCCAGATTTTGCTCTCTACGCCGCTG…
UL85
ATGGCGGCCATGGAGGCCAACATCTTCTGCACTTTCGACCACAAGCTCAGCATCGCCGACGTAGGCAAACTGACCAAACTAGTAGCGGCCGTTGTGCCCATTCCGCAGCGTCTACATCTCATCAAGCACTACCAGCTGGGCCTACACCAGTTCGTAGATCACACCCGCGGCTACGTACGACTGCGCGGCCTGCTGCGCAATATGACGCTGACGTTGATGCGGCGCGTAGAAGGCAACCAGATCCTCCTACACGTACCGACGCACGGACTGCTCTACACCGTCCTCAACACGGGACCCGTGACTTGGGAGAAGGGCGACGCGCTATGCGTGCTGCCGCCGCTCTTCCACGGACCGCTGGCGCGCGAGAACCTGCTGACGCTGGGCCAGTGGGAGCTGGTG…
UL86
ATGGAGAACTGGTCGGCGCTCGAGCTCCTGCCTAAAGTAGGCATTCCCACTGACTTTCTGACGCACGTCAAGACCAGCGCCGGCGAGGAGATGTTCGAGGCCTTACGCATCTACTACGGCGATGACCCCGAGCGTTACAATATTCACTTCGAAGCCATCTTCGGCACCTTCTGCAATCGCCTGGAATGGGTTTATTTTTTGACCAGCGGCTTGGCCGCGGCGGCGCACGCCATCAAGTTCCACGACCTCAATAAACTGACTACGGGAAAAATGCTGTTCCACGTACAGGTGCCGCGGGTGGCCAGCGGCGCCGGTTTGCCTACCAGTCGTCAGACCACCATTATGGTCACCAAATACAGTGAAAAATCCCCCATCACCATCCCCTTTGAGCTCAGCGCA…
UL87
ATGGCCGGCGCTGCGCCGCGCCGCCTCGGCTGTGACGCTCTAATAGTCGTCGGCGGCTCCGCTATGCCGCGCCGGGTTTTACACGTCCCCGTGCACGTTCGCGCCTGCAACCTCACCCAAGAGCTATCGACGGGCGAGGACGCCCGCTTCTGTCGTCCGCGACCCGTTAACGTCGAACGGGTGCGCGCTGTTTTTGCGGCTCTCTACCGTGCCTGTCCGATACACGTGAGGACCGAACCCGAGCGTGTCAAGCTGGTACTGGGTCGTCTGTTACTGGGACCCGTGGCCGTACCCTGTTTTTGCGACGGTGAAGTGGAGGGCCACGGTGAACATCTGGTACCTACGACGCAGTTTTGTCGCGGGCCGCTGCTCTACGTGCACCGACGTTGTTGTTGCGGA…
UL88
ATGATGGAAGCCGCGGCCGCTGCCGCCGCGGCGTTTCGTCCGGAGGAGCGTCCGACGCCGGGTTGGCACGACGCGGCGTTGTTAATGGACGACGGTACGGTGCGCGAGCACGCGTTTCGCAACGGACCGTTGTCGCAACTGATTCGCCGTGTGTTACCGCCGCCGCCCGACGCCGAAGACGACGTGGTTTTTGCTTCCGAGCTGTGTTTTTATTGCAGCGGTCGTTTTAACCGCAGGTCGTCCGTCTTCTCCATCTATTGGCAGAAGCATAGCGATCTGGTGTACGCGCTTACGGGCATTACCCATTGCGCCAAGTTGGTGGTGGAATGCGGTCAGTTGGGGAGTAGTAGGCTACGGTGGCGCGACGGTGATGCGAGTGGTGAGGAGCGCCGGGGAGAC…
UL89
ATGTTGCGCGGAGATTCGGCCGCCAAGATCCAGGAGCGCTACGCGGAGCTGCAGAAGCGCAAGAGCCACCCCACCTCCTGCATCTCCACGGCCTTCACCAATGTGGCGGCGCTGTGCCGCAAGCGCTACCAGATGATGCACCCCGAACTCGGGCTGGCCCACTCGTGCAACGAGGCCTTCCTGCCGCTCATGGCCTTCTGCGGCCGCCACCGCGACTACAACTCGCCCGAGGAAAGCCAGCGCGAGCTGCTGTTTCACGAGCGCCTCAAGAGTGCGCTCGATGAACTGACGTTTCGCCCGTGCTCCGAGGAGCAGCGCGCCTCCTACCAGAAGCTGGACGCGTTGACCGAGCTCTACCGCGATCCGCAGTTTCAGCAGATCAACAACTTCATGACCGAC…
UL91
ATGAACTCGTTGCTGGCGGAACTCAACCGACTGGGGGTCGCGCACGCCACTACGGAGGATGTTTTTATCTTTGTCGACCGCCTCTTTCAACACTTTTCCTTCCTTTTCCAGGCCGAGGAGTCAGGCCCGCGCCGCTTGGAACTGGTCGCGTCCGTGTTCGAGCACCTGACGGTGGAGTGCGTCAACGACATCCTGGACGCCTGCAGCCACCCGGACGTGAACGTCGTGGAGACAAGCAACACCTGTCGTCCCTGCCCTTCTCCTGTTCCCTCCGCCCCCAAAACTGTCAGCGACGCTCAGACGTCATGTGCGACGCCTCGGGCGCCTGTGACA
UL92
ATGTGCGACGCCTCGGGCGCCTGTGACATGAGGCACGTCCAGAACGCGTTTACCGAGGAGATCCAGTTACACTCGCTCTACGCGTGCACGCGCTGCTTTCGCACGCACCTGTGTGATCTGGGCAGCGGCTGCGCGCTCGTCTCCACGCTCGAGGGCTCCGTCTGCGTCAAGACGGGCCTGGTATACGAAGCTCTCTATCCGGTGGCGCGTAGCCACCTGTTGGAACCCATCGAGGAGGCCGCACTGGACGACGTCAACATCATCAGCGCCGTGCTCAGCGGCGTGTACAGCTACCTCATGACGCACGCCGGCCGTTACGCCGACGTGATCCAAGAGGTGGTCGAGCGCGACCGCCTCAAAAAGCAGGTGGAGGACAGTATTTACTTCACCTTTAATAAG…
UL93
ATGGAAACGCACCTGTATTCGGATCTGGCGTTTGAGGCGCGGTTCGCTGACGATGAGCAATTGCCTCTACACCTGGTGCTTGACCAGGAGGTGCTGAGTAACGAGGAGGCCGAGACGCTGCGCTACGTCTACTATCGTAATGTAGACAGCGCTGGCCGATCCGCGGGCCGCGTTCCGAGCGGAGATGAGGACGACGCACCGGCCTCCGACGACGCCGAGGACGCCGTGGGCGGCGATCGCGCTTTTGACCGCGAGCGGCGGACTTGGCAGCGGGCCTGTTTTCGTGTACTACCGCGCCCACTGGAGTTGCTCGATTACCTACGTCAAAGCGGTCTCACTGTGACGTTAGAGAAAGAGCAGCGCGTGCGCATGTTCTATGCCGTCTTCACTACGTTGGGT…
UL94
ATGGCTTGGCGCAGCGGGCTTTGCGAGACCGATTCCAGAACTTTGAAGCAGTTCTTGCAAGAGGAATGCATGTGGAAGCTGGTCGGCAAGAGCCGGAAACACCGCGAGTATCGGGCCGTCGCTTGCCGTTCGACGATCTTTAGTCCGGAGGACGACGGCTCGTGTATCTTGTGCCAATTGCTGTTGTTCTACCGCGACGGCGAATGGATCCTCTGTCTTTGCTGCAACGGCCGTTATCAAGGCCACTATGGCGTGGGCCACGTACATCGGCGTCGTCGACGCATCTGTCATTTACCTACCTTGTACCAACTGAGCTTCGGAGGTCCTTTGGGTCCAGCCAGCATTGATTTCTTGCCAAGCTTTAGCCAGGTGACCAGCAGTATGACGTGCGATGGTATT…
UL95
ATGATGGCGGCGGCGGTGGTGCGAGCGGAGGTTAGGCGGCAGCGGCGAGAGGAGAGGAAAAAGATGGCGTCCGCGAGGACGACGGAGGATCCACCTGAAAACCACGTTGTCGCGGACGTGGCTTGTGGGACGGGCGCCGTCACTCGTTCGTCTTCGTCGTCCCTAGTGGTGTCGTCTTCCTCGGCGTCAGGCTCAGACGAATCTTCCTCCGCCTCTCCTCTCAGTTTCCCCGTCTCCTCTCCCTCAACTGCCGTCAGGTCTCCGGGGTCCGCCGGGGTTTCGACGTCCCTGTGCTCGGTGGAACGGATGGTCGAGCTGTCGGCGCAGTCTCCGGCCGCCGATTTCTCGGTCTCCGAGGCTTGGCGCTTCGAGGAGGCCGTAAATATGGCGCTGGTGGCC…
UL96
ATGACGTCGGTCAACAAACAGCTCTTAAAGGACGTGATGCGCGTCGACCTTGAGCGACAGCAGCATCAGTTTCTGCGGCGTACCTACGGACCGCAGCACCGGCTCACCACGCAGCAGGCTTTGACGGTGATGCGTGTGGCCGCTCGGGAACAGACCCGATACAGTCAGCGAACGACGCAGTGCGTGGCCGCACACCTGTTGGAGCAACGGGCGGCCGTGCAGCAAGAGTTGCAACGCGCCCGACAGCTGCAATCCGGTAACGTGGACGACGCGCTGGACTCTTTAACCGAGCTGAAGGACACGGTAGACGACGTGAGAGCCACCTTGGTGGACTCGGTTTCGGCGACGTGCGATTTGGACCTGGAGGTTGACGACGCCGTC
UL97
ATGTCCTCCGCACTTCGGTCTCGGGCTCGCTCGGCCTCGCTCGGAACGACGACTCAGGGCTGGGATCCGCCGCCATTGCGTCGTCCCAGCAGGGCGCGCCGGCGCCAGTGGATGCGCGAAGCTGCGCAGGCCGCCGCTCAAGCCGCGGTACAGGCCGCGCAGGCCGCCGCCGCTCAAGTTGCCCAGGCTCACGTCGATGAAGACGAGGTCGTGGATCTGATGACCGACGAGGCCGGCGGCGGCGTCACCACTTTGACCACCCTGAGTTCCGTCAGCACAACCACCGTGCTTGGACACGCGACTTTTTCCGCATGCGTTCGAAGTGACGTGATGCGTGACGGAGAAAAAGAGGACGCGGCTTCGGACAAGGAGAACCAGCGTCGGCCCGTGGTGCCGTCC…
UL98
ATGTGGGGCGTCTCGAGTTTGGACTACGACGACGATGAGGAGCTCACCCGGCTGCTGGCGGTTTGGGACGATGAGCCCCTCAGTCTCTTTCTCATGAACACCTTTTTGCTGCACCAGGAGGGCTTCCGTAATCTGCCCTTTACGGTGCTGCGTCTGTCTTACGCCTACCGCATCTTCGCCAAGATGCTGCGGGCCCACGGTACGCCAGTAGCCGAGGACTTTATGACGCGCGTGGCCGCGCTGGCTCGCGACGAGGGTCTGCGCGACATTTTGGGTCAGCGGCACGCCGCCGAAGCCTCGCGCGCCGAGATCGCCGAGGCCCTGGAGCGCGTGGCCGAGCGGTGCGACGACCGGCACGGCGGCTCGGACGACTACGTGTGGCTCAGCCGGTTGCTGGAT…
UL99
ATGGGTGCCGAACTCTGCAAACGAATATGTTGTGAGTTCGGTACCACGTCCGGTGAGCCCCTGAAAGATGCTCTGGGTCGCCAGGTGTCTCTACGCTCCTACGACAACATCCCTCCGACTTCCTCCTCGGACGAAGGGGAGGACGATGACGACGGGGAGGATGACGATAACGAGGAGCGGCAACAGAAGCTGCGGCTCTGCGGTAGTGGCTGCGGGGGAAACGACAGTAGTAGCGGCAGCCACCGCGAGGCCACCCACGACGGCCCCAAGAAAAACGCGGTGCGCTCGACGTTTCGCGAGGACAAGGCTCCGAAACCGAGCAAGCAGTCAAAAAAGAAAAAGAAACCCTCAAAACATCACCACCATCAGCAAAGCTCCATTATGCAGGAGACGGACGAC…
UL100
ATGGCCCCCTCGCACGTGGATAAGGTGAATACACGGACATGGAGCGCTTCTATCGTTTTCATGGTGCTGACTTTTGTCAACGTCAGCGTGCATCTAGTGCTGAGCAATTTTCCGCACCTGGGCTACCCCTGCGTCTACTATCACGTCGTGGACTTTGAAAGGCTCAACATGTCGGCCTACAACGTAATGCACCTGCACACGCCTATGCTTTTCTTAGACTCGGTGCAGTTGGTGTGCTACGCCGTGTTCATGCAGCTCGTCTTTTTAGCCGTGACCATCTACTACCTGGTATGCTGGATCAAGATCAGCATGCGCAAGGACAAAGGCATGAGCCTAAACCAGTCGACACGCGACATTTCGTACATGGGCGACAGCCTCACAGCCTTCCTCTTCATTCTC…
UL102
ATGACCGCTCAGCCGCCGCTGCACCACCGCCACCACCCGTACACCCTGTTCGGGACCAGCTGTCATCTCAGCTGGTACGGCCTTCTAGAGGCCTCGGTGCCTATCGTACAATGTCTGTTTTTGGATCTGGGTGGCGGCCGTGCCGAGCCGCGGCTTCACACGTTCGTGGTGCGCGGTGACCGTCTGCCGCCGGCTGAGGTGCGTGCTGTGCATCGCGCCAGCTACGCTGCGCTGGCCTCGGCCGTGACTACGGACGCCGATGAGCGTCGGCGCGGCCTAGAGCAGCGTAGCGCCGTGTTGGCGCGCGTGTTGCTAGAAGGCAGCGCGTTAATCCGCGTGTTGGCGCGCACCTTCACGCCGGTGCAGATTCAGACGGACGCTAGTGGCGTGGAGATTTTG…
UL103
ATGGAGGCCCTGATGATCCGCGGCGTGCTGGAGGTCCATACGGATTTCACTAGACAGAATGTGATGATCATGGAGCCGCAAGTGCTCGACTTTACGGTGCGCGGCGACAAGCTGTGGCTGCACACGGAGCACGGGCTGCTGGTTTCCATGGCCGAGTACCGCAGCGAGTTGCTGTGCACCTCGGCCTTTCTGGGCTACTCCGCCGTGTTTTTGCTCGAGACCGAAGACGCCGTCACGCAGGTGAGGCTCTCGGATCTGCGGCTCAAACACCGCTGCGGCATCGTCAAGGCCGACAACCTGCTGCACTTCGCGCTCTGTACCGTTATTTCATGCGTGGAAAATTGCAACTTAACGCGCAAGTGCCTGCACGACCTGCTCCAGTACCTAGACGCGGTGAAC…
UL104
ATGGAGCGAAACCACTGGAACGAAAAATCCTCGGGCGCAAAGCGCTCGCGCGAGAGGGACTTGACCTTGTCGACGATCCGTTCGATCTTGGCGGCCGACGAGAGGTTGAGGATCAAGGCGTCGTCGTACTTGGGCGTGGGCCGCGGCGTGGATGACGAGGCCGTCATCGACATTTTCCCCACGGGCCAGACGATGAGCTTCCTGCGGTTGCTGCACGGCTTTCTGGGGACGTGTCGCGGCCAGAGCATGCACCAGGTGCTGCGCGACCCGTGCGTGCTGCGCAAGCAGCTGCTCTACGGAGTGTGCAAGACGCTCTTTGACACCATCACGGTGCGGCGCGTGGCCGAGGAGTGGAAGTTACACGCGGCGTTGTTTCCCTACCGCGCGCTGGACGAAGAG…
UL105
ATGTCGATGACGGCCTCGTCATCCACGCCGCGGCCCACGCCCAAGTACGACGACGCCTTGATCCTCAACCTCTCGTCGGCCGCCAAGATCGAACGGATCGTCGACAAGGTCAAGTCCCTCTCGCGCGAGCGCTTTGCGCCCGAGGATTTTTCGTTCCAGTGGTTTCGCTCCATCAGTCGCGTTGAACGAACGACAGATAACAACCCCTCTGCCGCAACTACCGCCGCGGCAACGGCGACCGTTCACTCCTCCGTCTCCTCTTCTGCCGCCGCTGCCGCTTCGTCCGAGGCCGGCGGCACGCGCGTGCCCTGCGTCGACCGTTGGCCCTTCTTTCCCTTCCGCGCGCTGCTCGTCACCGGCACGGCGGGCGCCGGCAAGACTTCCAGCATCCAGGTGCTG…
UL111A
ATGCTGTCGGTGATGGTCTCTTCCTCTCTGGTCCTGATCGTCTTTTTTCTAGGCGCTTCCGAGGAGGCGAAGCCGGCAACGACGACGACGATAAAGAATACAAAGCCGCAGTGTCGTCCAGAGGATTACGCGACCAGATTGCAAGATCTCCGCGTCACCTTTCATCGAGTAAAACCTACGTTGCAACGTGAGGACGACTACTCCGTGTGGCTCGACGGTACGGTGGTCAAAGGCTGTTGGGGATGCAGCGTCATGGACTGGTTGTTGAGGCGGTATCTGGAGATCGTGTTCCCCGCAGGCGACCACGTCTATCCTGGACTTAAGACGGAATTGCATAGTATGCGCTCGACGCTAGAATCCATCTACAAAGACATGCGGCAATGCCCTCTGTTAGGTTGC…
UL112
ATGGATCTGCCTACTACCGTCGTGCGAAAATACTGGACTTTTACGAATCCTAACCGCATCCTGCATCAGAGCGTTAATCAGACTTTCGACGTGCGCCAGTTCGTCTTTGACAACGCCCGTCTGGTCAACTGCGTGGACGGCGATGGCAAGGTGCTGCACCTCAACAAGGGCTGGCTCTGCGCTACCATTATGCAGCACGGCGAGGCTTCGGCTGGCGCCAAGACGCAGCAGGGCTTCATGTCCATTGACATTACGGGCGACGGGGAACTTCAGGAGCACCTCTTTGTACGCGGCGGTATCGTCTTTAACAAATCCGTCTCCTCGGTGGTGGGCTCCAGCGGACCCAATGAGAGCGCGCTGCTCACTATGATTTCCGAGAACGGTAATTTGCAAGTGACT…
UL114
ATGGCCCTCAAGCAGTGGATGCTCGCTAACATTGCTGATAATAAAGGCTCTCTGTTAACCCCCGACGAGCAGGCTCGCGTGTTTTGTCTGAGCGCCGACTGGATCCGCTTCCTCAGCTTGCCCGACCACGACACGGTGCTGCTGCGCGACACGGTGGCGGCGGTGGAGGGCGCGCGGCAACTCGAGATGGTGTACCCGGCACCCGAGCACGTACACCGCTGGAGCTATCTGTGTCCGCCCGAGCAGGTGCGCGTGGTGATCGTGGGCCAGGACCCGTACTGCGACGGCAGCGCCAGCGGCCTGGCCTTCGGCACGCTGGCGGGCCGACCGCCGCCGCCCTCCCTCAACAACGTGTTTCGCGAACTGGCGCGTACGGTGGACGGGTTTCAGCGTCCGGCC…
UL115
ATGTGCCGCCGCCCGGATTGCGGCTTCTCTTTCTCACCTGGACCGGTGATACTGCTGTGGTGTTGCCTTCTGCTGCCCATTGTTTCCTCAGCCGCCGTCAGCGTCGCTCCTACCGCCGCCGAGAAAGTCCCCGCGGAGTGCCCCGAACTAACGCGCCGATGCTTGTTGGGTGAGGTGTTTGAGGGTGACAAGTATGAAAGTTGGCTGCGCCCGTTGGTGAATGTTACCGGGCGCGATGGCCCGCTATCGCAACTTATCCGTTACCGTCCCGTTACGCCGGAGGCCGCCAACTCCGTGCTGTTGGACGAGGCTTTCCTGGACACTCTGGCCCTGCTGTACAACAATCCGGATCAATTGCGGGCCCTGCTGACGCTGTTGAGCTCGGACACAGCGCCGCGC…
UL116
ATGAAGCGGCGGCGGCGATGGCGGGGCTGGTTGCTTTTCCTGGCCCTGTGCTTTTGCTTACTGTGTGAAGCGGTGGAAACCAACGCGACCACCGTTACCAGTACCACCGCTGCCGCCGCCACGACAAACACTACCGTCGCCACCACCGGTACCACTACTACCTCCCCTAACGTCACTTCAACCACGAGTAACACCGTCACCACTCCCACCACGGTTTCCTCGGTCAGCAATCTGACGTCCAGCGCCACGTCGATTCTCATCTCAACGTCAACGGTTTCTGGAACAAGAAATACAAGGAATAATAATACCACAACCATCGGTACGAACGCTACTTCCCCCTCCTCTTCTGTATCCATACTTACCACCGTGACACCGGCCGCGACTTCTACCACCTCCAAC…
UL117
ATGGTCATGTTCTCCCAGGACCACGTCCAGATCGTCTACGGCTCCACACGCATCTGCAAGTCCCTGGCCCCGGCCAACAAGAGAAAGACCCATCGCACCATCGTGGTAGCGCCGCGGCGGGGTTTTTTGCGTATTCCCCCGGACGGGCAGGACGTTAACCACGTCAAGATCGTACCCACCACCACCTCCTCCTCCCTCGCGCCGCCCCGTGACGACGAACGGCGGCCGACCCCGCCGTTGCGGCCGCCGCTCACAGTCTATCCCTATGGCACGTCGCTGATCCGCAGGTCAGCTAGGGACGCAAAACTCCGCTCCAAGCTAATCGTCTTCCATATAACTCGGCCCGCACTCGGTCAGCACCCGCAGAATCCCGGGATCTCGGGCCCTGCGGCCATGGAT…
UL119
ATGTGTTCCGTGCTGGCGATCGCGCTCGTAGTTGCGCTCTTGGGCGACATGCACCCGGGAGTGAAAAGTAGCACCACAAGCGCCGTCACTTCCCCTAGTAATACCACCGTCACGTCTACTACGTCAATAAGTACCTCTAACAACGTCAGTTCTGCTGTCACCACCACGGTACAAACCTCTACCTCGTCCGCCTCCACCTCCGTGATAGCCACGACGCAGAAAGAGGGGCACCTGTATACTGTGAATTGCGAAGCCAGCTACAGCTACGACCAAGTGTCTCTAAACGCCACCTGCAAAGTTATCCTGTTGAATAATACCAAAAATCCAGACATTTTATCAGTTACTTGTTATGCACGGACAGACTGCAAGGGTCCCTTCACTCAGGTGGGATATCTTAGC…
UL120
ATGTACCGTGCGGGGGTGACGCTATTAGTGGTGGCGGTGGTAAGTTTCGGGAGATGGGACTCGGTGACGGTGGCAACTACAATTAGGGTAGGGTGGTGGTATGAACCTCAAGTAAAAATGGCTTATATCTATGAGCACAATGATACTAACCTGACTATTTTTTGTAACACAACAGCTTATGATTCGCCCTTTTTGGCCTCAGGGATGATGATCGTTCTCCCGCACCGTACACAGTTTCTCACCAGAAAAGTTAATTACAGCGAGGACATGGAAAACATTAAACAGAATTATACCCACCAACTGACACACATGCTGACAGGAGAGCCGGGAACCTACGTGAACGGCAGCGTTACTTGCTGGGGCTCTAATGGAACTTTTGGCGCCGGGACTTTCATAGTA…
UL121
ATGTGGGGGTGCGGGTGGTCCCGGATACTTGTCCTTCTCCTCCTCATGTGTATGGCCCTGATGGCGAGAGGCACATACGGGGCTTACATCTGCTCCCCCAACCCAGGGAGACTTAGAATCTCTTGCGCCCTCTCGGTGTTGGACCAAAGACTGTGGTGGGAGATCCAGTATTCATCGGGTCGTCTCACCCGAGTCCTGGTCTTTCATGATGAGGGTGAGGAGGGTGATGACGTACATCTCACGGATACCCATCACTGTACTTCCTGTACACATCCCTATGTGATTTCTTTGGTTACCCCGCTGACCATCAATGCCACGCTACGGCTGCTGATACGAGATGGGATGTACGGGCGGGGGGAGAAAGAGTTGTGCATCGCCCATCTACCCACCCTGCGAGAC…
UL122
ATGGAGTCCTCTGCCAAGAGAAAGATGGACCCTGATAATCCTGACGAGGGCCCTTCCTCCAAGGTGCCACGGCCCGAGACACCCGTGACCAAGGCCACGACGTTCCTGCAGACTATGTTAAGGAAGGAGGTTAACAGTCAGCTGAGCCTGGGAGACCCGCTGTTCCCAGAATTGGCCGAAGAATCCCTCAAAACCTTTGAACAAGTGACCGAGGATTGCAACGAGAACCCCGAAAAAGATGTCCTGACAGAACTCGGTGACATCCTCGCCCAGGCTGTCAATCATGCCGGTATCGATTCCAGTAGCACCGGCCCCACGCTGACAACCCACTCTTGCAGCGTTAGCAGCGCCCCTCTTAACAAGCCGACCCCCACCAGCGTCGCGGTTACTAACACTCCT…
UL123
ATGGAGTCCTCTGCCAAGAGAAAGATGGACCCTGATAATCCTGACGAGGGCCCTTCCTCCAAGGTGCCACGGCCCGAGACACCCGTGACCAAGGCCACGACGTTCCTGCAGACTATGTTAAGGAAGGAGGTTAACAGTCAGCTGAGCCTGGGAGACCCGCTGTTCCCAGAATTGGCCGAAGAATCCCTCAAAACCTTTGAACAAGTGACCGAGGATTGCAACGAGAACCCCGAAAAAGATGTCCTGACAGAACTCGTCAAACAGATTAAGGTTCGAGTGGACATGGTGCGGCATAGAATCAAGGAGCACATGCTGAAAAAATATACCCAGACGGAAGAAAAATTCACTGGCGCCTTTAATATGATGGGAGGATGTTTGCAGAATGCCTTAGATATCTTA…
UL124
ATGGAAAGGAACAGTCTGTTAGTCTGTCAGCTATTATGTCTGGTGGCGCGCGCGGCAGCAACGAGTACTGCTCAGACTACACTGCCCTCCACCGTTAACAGCACCGCAACAGGAGTTACCTCTGACTCTCAACAGAACACAACTCAGCTGCCTGCTTCTTCTGCTGCTGCCTTAAGTCTTCCATCTGCGTCAGCGGTGCAAGCCCATTCCCCGAGCTCATTTTCAGACACATACCCTACCGCCACGGCCTTGTGCGGCACACTGGTGGTGGTGGGCATCGTGCTGTGCCTAAGTCTGGCCTCCACTGTTAGGAGCAAGGAGCTGCCGAGCGACCATGAGCCGCTGGAGGCATGGGAGCAGGGCTCGGATGTGGAAGCTCCGCCGCTACCGGAGAAGAGC…
UL128
ATGAGTCCCAAAAACCTGACGCCGTTCTTGACGGCGTTGTGGCTGCTATTGGATCACAGCCGCGTGCCGCGGGTACGCGCAGAAGAATGTTGCGAATTCATAAACGTCAACCACCCGCCAGAACGCTGTTACGATTTCAAAATGTGCAATCGCTTCACCGTCGCGCTGCGGTGTCCGGACGGCGAAGTCTGCTACAGTCCCGAGAAAACGGCTGAGATTCGCGGGATCGTCACCACCATGACCCATTCATTGACACGCCAGGTCGTACACAACAAACTGACGAGCTGCAACTACAATCCGTTATACCTCGAAGCTGACGGGCGAATACGCTGCGGCAAAGTGAACGACAAGGCGCAGTACCTGCTGGGCGCCGCTGGCAGCGTTCCCTATCGATGGATC…
UL130
ATGCTGCGGCTTCTGCTTCGTCACCACTTTCACTGCCTGCTTCTGTGCGCGGTTTGGGCAACGCCCTGTCTGGCGTCTCCGTGGTCGACGCTAACAGCAAACCAGAATCCGTCCCCGCCATGGTCTAAACTGACGTATTCCAAACCGCATGACGCGGCGACGTTTTACTGTCCTTTTCTCTATCCCTCGCCCCCACGATCCCCCTTGCAATTCTCGGGGTTCCAGCGGGTATCAACGGGTCCCGAGTGTCGCAACGAGACCCTGTATCTGCTGTACAACCGGGAAGGCCAGACCTTGGTGGAGAGAAGCTCCACCTGGGTGAAAAAGGTGATCTGGTACCTGAGCGGTCGGAACCAAACCATCCTCCAACGGATGCCCCGAACGGCTTCGAAACCGAGC…
UL131A
ATGCGGCTGTGTCGGGTGTGGCTGTCTGTTTGTCTGTGCGCCGTGGTGCTGGGTCAGTGCCAGCGGGAAACCGCGGAAAAAAACGATTATTACCGAGTACCGCATTACTGGGACGCGTGCTCTCGCGCGCTGCCCGACCAAACCCGTTACAAGTATGTGGAACAGCTCGTGGACCTCACGTTGAACTACCACTACGATGCGAGCCACGGCTTGGACAACTTTGACGTGCTCAAGAGAATCAACGTGACCGAGGTGTCGTTGCTCATCAGCGACTTTAGACGTCAGAACCGTCGCGGCGGCACCAACAAAAGGACCACGTTCAACGCCGCCGGTTCGCTGGCGCCACACGCCCGGAGCCTCGAGTTCAGCGTGCGGCTCTTTGCCAAC
UL132
ATGCCGGCCCCGCGGGGTCCCCTTCGCGCAACATTCCTGGCCCTGGTCGCGTTCGGGTTGCTGCTTCAGATAGACCTCAGCGACGTTACGAATGTGACCAGCAGCACAAAAGTCCCTACTAGCACCAGCAACAGAAATAGCGTCGACAACGCCACGAGTAGCGGACCCACGACCGGGATCAACATGACCACCACCCACGAGTCTTCCGTTCACAACGTGCGCAATAACGAGATCATGAAAGTGCTGGCTATCCTCTTCTACATCGTGACAGGCACCTCCATTTTCAGCTTCATAGCGGTACTGGTCGCGGTAGTTTACTCCTCGTGTTGCAAGCACCCGGGTCGCTTTCGTTTCGCCGACGAAGAAGCCGTCAACCTGTTGGACGACACGGACGACAGT…
UL133
ATGGGTTGCGACGTGCACGATCCTTCGTGGCAATGCCAATGGGGCGTTCCCACGATTATTGTGGCCTGGATAACATGCGCGGCTTTAGGAATTTGGTGTTTGGCGGGATCGTCGGCGGATGTCTCTTCGGGACCCGGCATCGCAGCCGTAGTCGGCTGTTCTGTTTTCATGATTTTCCTCTGCGCGTATCTCATCCGTTACCGGGAATTCTTCAAAGACTCCGTAATCGACCTCCTTACCTGCCGATGGGTTCGCTACTGCAGCTGCAGCTGTAAGTGCAGCTGCAAATGCATCTCGGGCCCCTGTAGCCGCTGCTGTTCAGCGTGTTACAAGGAGACGATGATTTACGACATGGTCCAATACGGTCATCGACGGCGTCCCGGACACGGCGACGATCCT…
UL135
ATGGTGTGGCTGTGGCTCGGCGTCGGGCTCCTCGGCGGTACCGGACTGGCTTCCCTGGTCCTGGCCATTTCCTTATTTACCCAGCGCCGAGGCCGCAAGCGATCCGACGAGACTTCGTCGCGAGGCCGGCTCCCGGGTGCTGCTTCTGATAAGCGTGGTGCCTGCGCGTGCTGCTATCGAATTCCGAAAGAAGACGTCGTTGAGCCGCTGGATCTGGAACTGGGGCTCATGCGGGTGGCCACCCACCCGCCGACGCCGCAGGTGCCGCGGTGTACGTCGCTCTACATAGGAGAGGATGGTCTGCCGATAGATAAACCCGAGTTTCCTCCGGCGCGATTCGAGATCCCCGACGTATCCACGCCGGGAACGCCGACCAGCATCGGCCGATCTCCGTCGCAT…
UL136
ATGTCAGTCAAGGGCGTGGAGATGCCAGAAATGACGTGGGACTTGGACGTTGGAAATAAATGGCGGCGTCGAAAGGTCCTGAGTCGCATTCACCGGTTCTGGGAATGTCGACTACGGGTGTGGTGGCTGAGTGACGCCGGCGTAAGAGAAACCGACCCACCGCGTCCCCGACGCCGCCCGACTTGGATGACCGCGGTGTTTCACGTTATCTGTGCCGTTTTGCTTACGCTTATGATTATGGCCATCGGCGCGCTCATCGCGTACTTAAGATATTACCACCAGGACAGTTGGCGAGACATGCTCCACGATCTATTTTGCGGCTGTCATTATCCTGAGAAGTGCCGTCGGCACCACGAGCGGCAGAGAAGCAGACGGCGAGCCATGGATGTGCCCGACCCG…
UL138
ATGGACGATCTGCCGCTGAACGTCGGGTTACCCATCATCGGCGTGATGCTCGTGCTGATCGTGGCCATTCTCTGCTATCTAGCTTACCATTGGCACGACACCTTCAAACTGGTGCGCATGTTTTTGAGCTACCGCTGGCTGATCCGCTGTTGCGAGCTGTACGGGGAATACGAGCGCCGGTTCGCGGACCTGTCGTCGCTGGGCCTCGGCGCCGTACGGCGGGAGTCGGACAGACGATACCGTTTCTCCGAACGACCCGATGAGATCTTGGTCCGTTGGGAGGAAGTGTCTTCCCAGTGCAGCTACGCGTCGTCGCGGATAACAGACCGCCGCGCGGGTTCATCGTCTTCGTCGTCGGTCCACGTCGCTAACCAGAGAAACAGCGTGCCTCCGCCGGAC…
UL139
ATGCTGTGGATATTAGTTTTATTTGCACTTGCCGCATCGGCGAGTGAAACCACTACAGGTACCAGCTCTAATTCCAGTCAATCTACTTCTGCTGGTACCACTAACACGACTACACCATCGACAGCATGTATTAATGCTTCTAACGGCAGTGATTTGGGGGCGCCACAGCTCGCGCTACTTGCCGCTAGCGGCTGGACATTATCTGGACTCCTTCTCATATTTACTTGCTGCCTTTGCTGTTTTTGGCTAGTACGTAAAGTCTGCAGCTGCTGCGGCAACTCCTCCGAGTCAGAGAGCAAAGCCACTCACGCGTACACCAATGCCGCATTCACTTCTTCCGATGCAACGTTACCCATGGGCACTACAGGGTCGTACACTCCCCCACAGGACGGCTCATTT…
UL140
ATGACCCCCGCTCAGACTAACGGCACTACCACCGTGCACCCGCACGGCGCAAAAAACGGCAGCGGCGGTAGTGCCCTGCCGACCCTCGTCGTTTTCGGCTTCATCGTTACGCTACTTTTCTTTCTCTTTATGCTCTACTTTTGGAACAACGACGTGTTCCGTAAGCTGCTTCGCTGCGCTTGGATCCAGCGCTGCTGCGACCGCTTCGACGCGTGGCAAGACGAGGTCATCTACCGTCGTCCATCACGTCGTTCCCAAAGCGACGACGAGAGTCGTACTAACAGCGTGTCATCGTACGTTCTTTTATCACCCGCGTCCGATGGCGGTTTTGACAACCCGGCACTGACAGAAGCCGTCGACAGCGTGGACGACTGGGCGACCACCTCGGTTTTTTACGCC…
UL141
ATGTGCCGCCGGGAGTCGCTCCGAACTCTGCCGTGGCTGTTCTGGGTGCTGTTGAGCTGCCCGCGACTCCTCGAATATTCTTCCTCTTCGTTCCCCTTCGCCACCGCTGACATCGCCGAAAAGATGTGGGCCGAGAACTATGAGACCACGTCGCCGGCGCCGGTGTTGGTCGCCGAGGGAGAGCAAGTTACCATCCCCTGCACGGTCATGACACACTCCTGGCCCATGGTTTCCATTCGCGCACGTTTCTGTCGTTCCCACGACGGCAGCGACGAGCTCATCCTGGACGCCGTCAAAGGCCATAGGCTGATGAATGGACTTCAATACCGCCTGCCGTACGCCACTTGGAATTTCTCGCAGTTGCATCTCGGCCAAATATTCTCGCTGACTTTCAACGTA…
UL142
ATGCGGATTGAATGGGCGTGTTGGTTATTCGGATACTTTGTGTCATCCGTTGGGAGCGAACGGTCATTATCCTATCGTTACCACCTGGAATCTAATTCATCTGCCAACGTGGTTTGTAACGGAAACATTTCCGTGTTTGTAAACGGCACCCTAGGTGTGCGATATAACATTACGGTAGGAATCAGTTCGTCTTTATTAATAGGACACCTTACTATACAAACATTGGAGTCATGGTTCACACCCTGGGTCCAAAATAAGAGTTACAGCAAACAACCCCTAAGTACCACCGAAACGCTTTACAATATAGATAGCGAAAACATTCATCGCGTATCTCAATATTTTCACACAAGATGGATAAAATCTCTGCAAGAGAATCACACTTGCGACCTCACAAACAGT…
UL144
ATGAAGCCTCTGGTGATGCTCATCTGCTTCGGTGTGATATTATTGCAGCTTGGGGTGACTAAAGTGTGTCAGCATAATGAAGTGCAACTGGGCAACGAATGCTGTCCTCCGTGTGGTTTGGGACAAAGAGTTACTAAAGTATGCACGGAGCGTACCAGCGTAACGTGTACCCCTTGCCCCAACGGCACGTATGTATCGGGACTTTACAACTGTACCGATTGCACTCAATGTAACGTCACTCAAGTCATGATTCGTAACTGCACTTCCACCAATAATACCGTATGCGCGCCTAAGAACCATACGTACTTTTCCACTCCAGGCGTCCAACATCACAAGCAACGACAGCAAAATCATACCGCACATATAACCGTCAAACAAGGAAAAAGCGGTCGTCATACT…
UL145
ATGTACGGCGTCCTGGCTCATTACTACTCCTTCATCAGTAGTCCCAGCGTTATGGTTAATTTTAAGCATCATAACGCTGTGCAGCTGTTGTGTGCACGGACCCGAGACGGCACTGCCGGATGGGAACGTTTAACCCATCATGCGTCGTATCACGCGAACTATGGGGCATACGCCGTGTTGATGGCTACATCGCAAAGAAAGTCCCTAGTGTTACATCGATACAGTGCCGTGACAGCCGTGGCCCTGCAGCTCATGCCTGTTGAGATGCTCCGTAGGCTAGATCAGTCGGACTGGGTACGGGGTGCCTGGATCGTGTCAGAGACTTTTCCAACCAGTGACCCCAAAGGGTTTTGGAGCGACGATGACTCCCCGATGGGTGGAAGTGAAGAT
UL146
ATGCGATTAATTTTTGGTGCGTTGATTATTTCTTTAACGTATATGTATTATTATGAAGTGCATGGAACGGAATTACGCTGCAAATGTCTTGATGGTAAAAAACTGCCGCCCAAAACAATTATGTTGGGTAATTTTTGGTTTCATCGCGAATCTGGTGGTCCCAGATGCAATAACAATGAATATTTCTTGTATCTAGGCGGAGGAAAAAAACATGGACCTGGAGTATGTTTATCGCCCCATCACCCTTTTTCAAAATGGCTAGACAAACGCAACGATAACAGGTGGTATAATGTTAATGTAACAAGACAACCGGAACGAGGGCCGGGAAAAATAACTGTAACCCTAGTAGGTCTGAAGGAA
UL147
ATGTTGCTAACATGGTTACATCATCCGATTCTGAATTCGCGCATTAAACTTTTATCGGTACGATACCTGTCATTGACCGCATATATGTTACTTGCCATATGTCCCATAGCCGTCCGTCTTTTAGAACTAGAAGATTACGACAAGCGGTGTCGCTGTAATAACCAAATTCTGTTGAATACCCTGCCGGTCGGAACCGAATTGCTTAAGCCAATCGCAGCGAGCGAAAGCTGCAATCGTCAGGAAGTGCTGGCTATTTTAAAGGACAAGGGCACCAAGTGTCTCAATCCTAACGCGCAAGCCGTGCGTCGTCACATCAACCGGCTATTTTTTCGGTTAGTCTTAGACGAGGAACAACGCATTTACGACGTAGTGTCTACAAATATTGAGTTCGGTGCCTGG…
UL147A
ATGTCCCTATTTTACCGTGCGGTAGCTCTGGGCACACTAAGCGCTCTGGTGTGGTACAGCACTAGTATCCTCGCAGAGATTAACGAAAATTCCTGCTCCTCATCTTCTGTGGACCACGAAGATTGCGAGGAACCGGACGAGATCGTTCGCGAAGAGCAAGACTATCGGGCTCTGCTGGCCTTTTCCCTAGTGATTTGCGGTACGCTCCTCGTCACTTGTGTGATC
UL148
ATGTTGCGCTTGCTGTTCACGCTCGTACTGCTGGCCCTCTACGGACCGTCTGTCGACGCTAGCCGCGACTATGTGCATGTTCGACTACTGAGCTACCGAGGCGACCCCCTGGTCTTCAAGCACACTTTCTCGGGTGTGCGTCGACCCTTCACCGAGCTAGGCTGGGCTGCGTGTCGCGACTGGGACAGTATGCATTGCACGCCCTTCTGGTCTACCGATCTGGAGCAGATGACCGACTCGGTGCGGCGTTACAGCACGGTGAGCCCCGGCAAGGAAGTGACGCTTCAGCTTCACGGGAACCAAACCGTACAGCCGTCGTTTCTAAGCTTTACGTGCCGCCTGCAGCTAGAACCCGTGGTGGAAAATGTTGGCCTCTACGTGGCCTACGTGGTCAACGAC…
UL148A
ATGAGTTCCGATAGCAATTTTGATCCCTGGATTCCCGTGTGTGTCGTGGTGGTCATGACCTCCGTAGTCCTGTTCGCAGGTCTGCACGTGTACCTGTGGTACGTTCGGCGGCAGCTGGTGGCGTTCTGCCTGGAGAAGGTGTGCGTCCGCTGCTGTGGCAAAGATGAGACGACGCCGCTGGTGGAGGACGCCGAACCGCCGGCCGAGCTGGAGATGGTGGAAGTGTCGGACGAGTGTTAC
UL148B
ATGGCGCTGGATACGCTAGCGGGGCTGGCTATCTGCGTGGGTCTAGTCATGGGGGTTACCGTGATCGCGTCGTGCGCGCTGCTGGTGTTTTATTATTGCGATGAGAGGGAGGATGGCCGTCCGTCGAAGCTGTTGCAACGTAGCATTCGACGTTGGCGACACGGCCTTAGCACCGAATCCTTAACCGCTATCCTGCCGGACGGTTCGTCCACGGAGCAGGAGATCTACCACACGCGACTT
UL148C
ATGTTAACTCCCGCGGTCTTTCCGGCCGTGCTCTACCTCCTGGCGCTTGTCGTCTGGGTTGAGATGTTCTGCCTCGTCGCCGTAGCCGTCGTCGAGCGCGAGATCGCCTGGGCGCTGCTGTTGCGGATGCTGGTCGTTGGCCTGATGGTGGAAGTCGGCGCCGCCGCCGCTTGGACCTTCGTGCGTTGTCTCGCCTATCAGCGTTCCTTCCCCGTGCTTACAGCCTTCCCC
UL148D
ATGACGGCGCCCAAGTGTGTCACCACCACGACCTATCTGGTCAAGACCAAGGAGCAGCCCTGGTGGCCCGACAACGCCATCAGGAGATGGTGGATCAGCGTTGCCATCGTCATCTTCATCGGAGTCTGTCTGGTGGCCCTGATGTACTTTACGCAGCAGCAGGCACGCAACGGGAGCGGCAGCGGC
UL150
ATGCTCACACTCTATCTCTTCACAGCGACATGTTGCTTCGTCTGTGCACTGCCGCGACAAGCACAAGTGGACACCGCCATCTGCCACCACACATGGCCCATGTGCTCCGACGTCCCGCATCCAACGTCGTCTGCTCACAACACGGCGCTTTCTTCCTCGCACGCCATCTCCATCGAACACCGTCTGCTGCATTCGCCGTCGCCTCCACGAGAGAACATACGCCACAGCATGCGCTGTCGCCGCCGCGCCATAGCCTCCTCGGCTTCCACACCGGTTTCGCACACCCAGCCCCTGGCTGCCAACCACAGACGTTCAAGGATCACGTACGCGACGACCGATCCCACCAATTCTCCAACGGCCTCGCCCGCCAAGTCAGACAAGCTGGAAGCCGACGCAGAC…
UL150A
ATGGCCTCGTGCTCACCGCCGCGGAGAGTGTCGCCGGACCTGCTCGTCAGCAGCGAGCTACGCAGACGGAATATCTGGAGGAGAGTTACGTGTGTCACAGGAGAGCGCGGGTCTCCGGCGGTAACGACGGCGGTGTCGTCGACACGTGTGCGGCCTGCTGTGCTCTGCGGAAAAGCGCCGGTCTCGGAGACCGTGGACGAAAAAGAGAACGGAGCAGCTACCGCTGGCGGCGGCGGCGTTAATGCTGCCGTTGATGTTAGACGTTGTGAGTACTCGGAAACAGCGGTGAGGCAGAAGCTCGATCCTTCAGGGAACGACAGTCGATGTGTGGTAGCCGCAGCAGATAGTTCCACGGACAGCGACGGCAAGTCCATAATCGCCGGTGTGCAAGTGGTGGAC…
IRS1
ATGGCCCAGCGCAACGGCATGTCGCCGCGCCCCCCGCCCCTCGGTCGCGGCCGCGGGGCCGGAGGGCCTTCGGGGGTTGGTTCCTCTCCTCCTTCTTCTTGTGTGCCGATGGGAGCGACGTCAACAGCGGGCACTGGTGCGAGTGCTGCGCCTACGGCGACGCCGGGCCACGGCGTCCACCGGGTAGAACCCCGCGGGCCGCCGGGCGCCCCTCCGAGTAGCGGCAACAACAGCAACTTTTGGCACGGCCCGGAGCGCCTGTTGCTGTCTCAGATTCCGGTGGAGCGCCAGGCGCTGACGGAGCTGGAATACCAGGCCATGGGCGCCGTGTGGCGCGCGGCGTTTCTGGCCAACAGCACGGGCCGCGCCATGCGCAAGTGGTCGCAGCGCGACGCGGGC…
US1
ATGGCGTCCGGGCTCGGTGACCTCTCGGTCGGCGTGTCCAGCCTTCCCATGCGGGAACTGGCCTGGCGGCGGGTAGCCGACGACTCACACGACCTATGGTGTTGCTGTATGGACTGGAAGGCGCACGTTGAGTACGCGCATCCTGCGTCGGAGCTCAGACCGGGCTCCGGCGGGTGGCCTGAGCACGCCGAGGCCCAGTGGCGGCAGCAGGTGCACGCTGCTCACGACGTGTGGTGTAACTGCGGAGACTGGCAGGGACACGCGCTACGTAGCCGGTCGCGGACCGCGGAGTCGGGGAGAAGCTCCTCGTCATCCTCCGTGTCGGTCCTTAGTGACGGCGATCAGCAGCCGTGGTGGAGGAGGCTACGCGTGAAAAGACCCAAATTCCCATCTTGGGCG…
US2
ATGAACAATCTCTGGAAAGCCTGGGTGGGTCTTTGGACCTCCATGGGTCCCTTGATCCGCCTGCCCGATGGCATCACTAAAGCCGGGGAAGACGCGCTCCGGCCCTGGAAGTCCACGGCCAAGCACCCCTGGTTTGAGATCGAGGACAACCGGTGCTACATTGACAACGGCAAGTTGTTTGCTCGGGGGAGCATCGTGGGCAACATGAGTCGGTTCGTCTTCGATCCGAAGGCCGATTATGGCGGCGTGGGAGAGAACCTGTACGTACACGCCGACGACGTGGAGTTCGTTCCCGGGGAGTCGTTAAAGTGGAACGTGCGGAACTTAGATGTGATGCCGATCTTCGAGACGCTAGCCCTGCGTCTGGTACTGCAAGGGGATGTGATCTGGCTGCGTTGC…
US3
ATGAAGCCGGTGTTGGTGCTCGCGATCCTGGCCGTCCTGTTCCTGAGACTCGCGGACTCGGTGCCCCGGCCCCTGAATGTGGTGGTATCGGAGATCAAATCGGCCCACTTTCGGGTGGAGGAGAACCAATGCTGGTTCCATATGGGCATGCTGTACTTCAAGGGGAGGATGTCGGGCAACTTCACCAAGAAACACTTTGTGAACGTGGGTATCGTCTCTCAATCTTACATGGACAGATTGCAAGTGTCCGGTGAGCAGTACCACCATGATGAGCGCGGAGCCTATTTCGAGTGGAACATCGGTGGGTACCCGGTGTCGCACACCGTGGATATGGTGGACATCACGTTGTCTACGAGGTGGGGAGACCCCAAGAAATATGCCGCGTGTGTTCCCCAGGTG…
US6
ATGGACCTCTTGATCCGTCTCGGTTTTCTGTTGATGTGTGCGTTGCCGACCCCCGGTGAGCGGTCTTCGCGTGACCCGAAAACCCTTCTCTCTCTGTCTCCGCGACAAGCTTGTGTTCCGAGAACAAAGTCGCACAGACCCGTTTGTTACAACGATACAGGGGACTGCACAGATGCAGATGATAGCTGGAAACAGCTGGGTGAGGACTTTGCGCACCAATGCTTGCAGGCGGCGAAAAAGAGGCCTAAAACGCACAAATCCCGTCCGAACGATAGGAACCTTGAGGGTAGGCTGACCTGTCAACGAGTCCGTCGGCTACTGCCCTGTGATTTGGATATTCATCCTAGCCACCGGTTGTTAACGCTTATGAATAACTGCGTCTGTGACGGGGCCGTTTGG…
US7
ATGCGGATCCAGCTGCTTCTGGTATCTACCTTGGTGGCGTCTATCGTCGCCACACGTGTGGAAGACATGGCGACTTTCCGCACGGAAAAGCAGTGGCAGCAGGACCTGCAATACAGAAGGGAATTTGTAAAAAGGCAATTAGCCCCCAAACCTAAGTCCAACATCGTGGTATCTCACACCGTCAGCTGCGTAATTGACGGTGGAAACATGACCAGCGTTTGGCGGTTTGAGGGACAATTTAATCCTCACATCGCATCAGAGGTCATCCTTCATGATACCAGTGGCTTGTATAACGTGCCTCATGAAGTACAAAACGACGGTCAAGTTCTCACCGTCACGGTGAAACGTAGCGCCCCCGCCGACATCGCTAAAGTACTCATCTCACTGAAACCCGTGCAA…
US8
ATGAGGCGGTGGCTGCGCCTCCTCGTCGGCCTGGGCTGCTGTTGGGTAACGCTGGCTCACGCCGGCAACCCCTATGAGGACGACGACTACTATTACTATAGGGAGGACGAACCGCGACAACACGGTGAACCGAACTATGTGGCTCCGCCGGCACGTCAGTTTCGCTTTCCGCCGCTTAACAACGTGTCCAGCTATCAGGCCAGCTGCGTCGTCAAGGACGGCGTGTTGGACGCTGTGTGGCGTGTACAGGGTACGTTCTATCCCGAGAAAGGGATAGTGGCTCGGGTCGGCTGGTCGGGCCGTCGCGGACGAAAGTGGGGCCGTCTGCACGCCCCGGAGTGCCTCGTGGAGACCACCGAAGCCGTATTCCGTTTGCGCCAGTGGGTGCCCACGGACTTG…
US9
ATGATCCTGTGGTCCCCGTCCACCTGTTCCTTCTTCTGGCACTGGTGTCTGATCGCAGTAAGTGTACTCTCGAGCCGCTCCAAGGAGTCGCTCCGGTTGTCGTGGTCCAGCGACGAGTCGTCTGCGTCCTCGTCGTCTCGTATCTGTCCGTTGTCAAATAGCAAGTCCGTTCGTCTGCCCCAGTACCCTCGCGGGTTTGGGGACGTGTCCGGCTACCGTGTCTCCAGTTCCGTGTCCGAATGTTACGTCCAGCACGGGGTACTCGTGGCCGCCTGGCTTGTGCGTGGCAACTTCTCCGATACGGCCCCGAGAGCCTACGGCACCTGGGGTAACGAGCGGAGCGCGACCCATTTCAAGGTCGGCGCACCCCAGCTGGAAAATGACGGGGCTCTACGTTAC…
US10
ATGCTACGCCGGGGAAGCCTCCGGAACCCTCTGGCGATCTGCCTGTTGTGGTGGCTGGGAGTGGTGGCGGCAGCCACGGAGGAGACGAGAGAACCTACCTACTTCACGTGCGGCTGTGTTATTCAGAACCATGTACTGAAGGGTGCGGTGAAACTCTATGGACAATTCCCCTCGCCTAAGACTTTGCGGGCCTCGGCTTGGCTACACGACGGGGAAAATCACGAAAGGCACCGGCAGCCCATCCTCGTGGAAGGCACCGCGACAGCTACCGAGGCGCTGTACATTCTGCTGCCCACGGAACTGTCGTCGCCGGAAGGAAACCGACCCCGAAACTACTCTGCTACCCTAACACTCGCCTCCCGGGATTGTTATGAACGCTTCGTGTGCCCGGTATACGAT…
US11
ATGAATCTTGTAATGCTTATTCTAGCCCTCTGGGCCCCGGTCGCGGGTAGTATGCCTGAATTATCCTTGACTCTTTTCGATGAACCTCCGCCCTTGGTGGAGACGGAGCCGTTACCGCCTCTGCCCGATGTTTCGGAGTACCGAGTAGAGTATTCCGAGGCGCGCTGCGTGCTCCGATCGGGCGGTCGACTGGAGGCTCTGTGGACCCTGCGCGGGAACCTGTCCGTGCCCACGCCGACACCCCGGGTGTACTACCAGACGCTGGAGGGCTACGCGGATCGAGTGCCGACGCCGGTGGAGGACATCTCCGAAAGCCTCGTCGCAAAACGCTACTGGCTCCGGGACTATCGTGTTCCCCAACGCACAAAACTCGTGTTGTTCTACTTTTCCCCCTGTCAT…
US12
ATGGTACAGATCCAGTTTCACCAAGGCGAGCCACTCGGCCATAAGAAAGAGAAACCCCCACCCGTGTCGCCGCCGTCACCACCGCCGATCCGTCGAGTCACCGTAATCACCAAAGATGAAGACACCCTGCGGAGCGTTCAACACTTTCTCTGGATGGTACGTCTCTACGGCACCGTCGTGTTCCAGACCAGCGCCACCATAGCCACTACCATCCTTTTCATGCTCATACCGTGGCGCGTGACAACCCCCTACCTGCGCGATACACTGCCCTTCTGGAGCACACTGCTACCCTGTGCTCTGCGTTGCCACGCGTACTGGCTGGAACGTCAGCGCCGACCCGGGACCCTGATGCTGGTCATGGTATATACCACCCTCACTACGATATCCGTGTCCACCATC…
US13
ATGGACCCGCCGCTGCCGTCGCTACATTCGCCGCAATGGGCTTCCCTCCTGCAGCTGCACCACGGCCTTATGTGGCTGCGCCGTTTTGCTGTCCTCGTCCGGGTCTACGCCCTAGTGGTCTTTCACATCGCCATCAGTACGGCTTTCTGCGGAATGATTTGGCTGGGTATCCCCGATTCCCACAACATATGTCAACATGAATCTTCCCCTCTGCTGCTGGTTTTTGCCCCCTCCCTTCTCTGGTGTTTGGTCTTGATACAGGGCGAAAGGCACCCCGACGACGTGGTATTGACCATGGGCTACGTAGGCCTCCTCTCCGTTACCACGGTTTTCTACACCTGGTGCTCCGACCTGCCCGCCATCCTCATCGACTACACACTGGTCCTCACGCTGTGGATA…
US14 (CODON OPTIMISED)
ATGGAGACCGTCAGCACCCAGAGAGAAACCGCCTCATCCGAGACAGAAAGGACAAGAGAAGCCGCCTCAGCCGAGACTACCGACGCCACATTCCGATCACTGGAGGAAGGCAGCACCATCAGCTCCCGGTACTCTGAGACTGCAAGTACCGCCTCAGAAGATGCCGTGTGCTGGCTGCGGAGAACAGCAATCGTCATGCGGGTGTATGGGCTGCTGACACTGGAGACTGCCTTCAGCGTGCTGATCAGCGCCCTGGTGTGGCTGGGCTACCCCAGTCTGGGGTATGAATGCAGGGACGATCCCTCCCCTCTGCTGCTGTCTTGTACTCCAGTGCTGGTCCTGGGGGCCCTGGAGCTGACCGACCACCGGCATCCCAGCAACGGACTGGTCTTCGCTCTG…
US15
ATGAGAAGAGAAAAAGGGTTTCAAGTACCCACCGATGGCACGGTCATCTACGTGCCCCCCGGGATCCAAGAGACCCGGCTGGCGACCCGCAGTCTGGCTTGGGTCGACTGTTGCCGCGTGGCGCTGCACACCTATGGCGCCGTGGGTTGGCAGCTGGCCGGCTTGACCGCGTTGTTGAGCGCCTTCTGCTACGCGGCGCCCGCGACGTGGTTTCACCATTCCCGTCTGTGTCTCACGGAGTCCTCGCCCAGCCTCGTCTTTGTCATACCCGTCACGTCGGTGATCTTCATTCACTGTTACGAAACATCGCATCCCAGCAATATCGGCGTTCTGCTCTTTTACACGCTGCTTCACGTGCCGCCGTTGATCGTAATATGTCTCTGCCTGGACGGTACGTTG…
US16
ATGGGTCTGCGCTTTCCCACCGCGACCCAGCGACAGATCGTGTTTCGGCGGCTGTTCGACAGCGGCAACAACGACGACTATGATGAAGCGGCCGTGGTGGCCGTGCTGGGCTGGGTGCATCGCTTCGAGGTTGTCGTCCGAATCGCCGGCTTGCTCCTCTTCCAAATCTCCACGGCGGTGGCCGTCTTGGGTAGCTTCTCTCTGGTCTTCCCTACAGCGACTCTCAAGTCGCGTCCGGGCTTTCCTTGTCACGTTGTCTGGGCGCCCGAGGTGCTCCTCCTGGTGCCTGTGGCCTCCGCGCTCTTCGTGTATTTCCGCTATGAGCGACCGGTTCTCGCTCAGCGAAACCGGCACCCGCGCTGCCGTCGTCCGTTCCGACAGCTGGTGCTATTACTCGCC…
US17 (CODON OPTIMISED)
ATGAGCCCCAATTCAGAAGCAACCGGCACCGCCTGGGCACCACCCCCCCCCCGACCTAGCAGAGGAGTGATTATGATTAGCTCCGTGTCAACAAACGACGTGCGGCGGTTCCTGCTGTGCATGCGGGTGTACAGCACTGTGGCAGTCCAGGGAACCTGCACATTCCTGCTGTGCCTGGGCCTGGTGCTGGCTTTTCCCCACCTGAAGGGCACCGTCTTCCTGTGCTGTACAGGGTTTATGCCCCCTCTGAGCCTGATGGTGCCTACCATCTGTCTGGCCCTGCTGCATGGAAAACGGGATGAGGGCTCTTTTACTAGTCCACCCTCACCCGGGCTGCTGACCATCTATAGTGTGCTGACCACACTGTCTGTGATTGTCGCAAGTGCCTGCTCTAGTTCA…
US18
ATGGGCGACACCGCCTCGGTTTCCGAACACCATGAGTCGCCGACGGTCACCATCGTGCCGCTCCATCGCAGCCACGCGCTGGTGGCCGAACAGCAGCTCTTCCAATGGTTGAAACGCTTTAAGCTGCTCATGGAGGTCTATCACGGGCTCGTGTGGCAGCTGGCTTGTACCCTCACGGTCTGCTTGCTGGCTTGGCTCGCCTTCCCCGATGTGCAGGGACAGTGCGCCAACGGCATAGTGCCAGCCCTATCCTCCATCGTACCCGTGTCCACGCTGGCTATGCTACGCGGTTTCGCCGAGTTTCGCCCACACACCACCAATTTTGCTCATCTCACAGTGGCGTGCTTGCTGATCAACACCGGCATCACCGTGTGCACGGGCTTTTGCGGAGAAAGGCGC…
US19
ATGCTTCATGTCGTCCCGCTAGAATGGACCGTCGAGGAGGTAGTCCCCTACCTAGAGAGGCTGGCGGTATGGCTGCGCGCCTCCGTCCTCGTCGCCTTCCAGCTTACCGCCACCGTCGCCCTCAGCGTGCTCAGCTGGTGGCTCATGCCGCCACCGGTGGCCGAGCTATGCGAGCGGGGACGGGACGACGACCCACCGTCGCTTTCTCATCTCAGCCTCGTCGTGCCCGTCGGCTGCCTGTTCCTGCTGCTACGCGGTCCGTCGATCGACCGTTGTCCCCGCAAACTCCCACTCCTGTTGGCTTACTGCCTGCCGCACGCGCTAGCCTTTCTGACCTTGCTGATGTGCCAGCCGTCGCCGCAGGCCTTTGTCGGCGCGGCTCTTCTCGCCCTGGCGGTA…
US20
ATGCAGGCGCAGGAGGCTAACGCGCTGCTGCTCTCCCGCATGGAGGCTCTCGAGTGGTTCAAAAAGTTCACCGTATGGCTGCGCGTGTACGCCATCTTCATCTTTCAGCTGGCTTTCAGCTTCGGCTTGGGAAGCGTTTTTTGGTTGGGGTTCCCACAAAACCGCAACTTTTGCGTCGAGAACTACAGCTTCTTTCTCACCGTGCTCGTGCCCATCGTCTGCATGTTCATCACGTACACGTTGGGCAACGAACACCCTAGTAACGCCACGGTGCTTTTCATCTATCTGTTGGCCAACAGCCTGACGGCGGCCATCTTCCAAATGTGCTCTGAAAGCCGCGTACTAGTAGGTTCCTACGTGATGACCCTGGCGTTGTTTATCTCCTTTACGGGGCTGGCG…
US21
ATGTCGCTCCGCGGTCAGGTCCAGATAGCCCGGTCGGTCTTCCTGTTGCGCATCTACATCCTTATCTGGGTGCAATGCCTCATCCTTATGAGCGTCTGCGCCTTTTGCTGGCTGGTGTTGCCGCACCGGCTGGAGCAGCTCTTTTCCAGCGTGCGTCTGACGCTGTCTTGCTTAATGATCTCCATCGTGTGCCTAGGTCTGTTGCGTTGGGCCGAGCCCAACTTTCCCAAAAACGTATGGATCTTACTGACGTACACGTTGCTTACCAGCGTGGCTGTCACGGCGTCAGGCTTCCACTTTAGTCATCGTTCAGTCATTTATGCCATGGTGGCCACAGTGACGCTATTTTGTTTCCTCACGCTCGCTACGTATCTGTTTGCCCGCGACGTGGAATTACAG…
US22
ATGTCCCTACTCACCAAAGCCGCCGCCGAAGCCTGGGGCACCTATCTCCGACAGCGCGACGAGCGCTGCGAAGATGCTATCCGCTGCGACTACGGCGTTTTCCAATTTAGAAACACCGTCTTTCAAAAGACGTTATCGATGCTGCAAGGCCTCTATCTGCGCCAGTACGATCCTCCGGCGCTGAGAACCTACGTGCAGCGCCACCAGGGAACCACCGTAGCACTGCGCAACCCCGCCAACTGGTTCCTAGTGATGCGCGAACAGGCCGCTATCCCGCAGATTTACGCACGTTCTCTGGCCGCCGACTATCTCTGCTGCGATGACACCCTGGAAGCCGTCGGTGTACTAGCCGTACGTCCACCCGACAGCGATCTAACACGAAACACCAAGCAGGCGCAG…
US23
ATGTGGCGTACACGCTGGGAAGACGGAGCTCCCACGTTTACGCGAAACGATGAATTCCTCTATTGCCACACGCGCTACGAAACTTTTCTGCGGGTCATGGGCGACTTTCAGGGCATCTTTGAGTGCCAGTACAGCGCCGACGTGCTTCGCGACTGGGTCCGTAACCACGTCGACCAGGTGTTGTCGCTCGGCATTCCGCACAACTGGTTCCTGCAGGTGCGGCCCGGCAGCACCATGCCGGAGCTGCGCGACCAACTGCTGGACGACGTAATTTGTTGCCCCGAACGCCTTATCGTGCTAGGCAAATGCGTGATCATGGTGGACGATCACTATGAAGAGACGGAGCTGGTGCTCTGCATGGGTGGCGGTACGCGCCTCTACATCTACGAACCCTCGCAA…
US24
ATGATGGATCCGGCTGCGGGTTCTGGCCCTGACGGCGCTGCAGTTGTGCCGCCGGAGCTCCCCGCGCTGCCTGTGGCGGCTGAGGATCCCATGGCGTTATACCGACAAGTGTTGCGGGATTTTAAGGAACTGTTCTTTTGCCTGGAGCCAATGGAAATCACGCGTTACGTTCATCGTAACGAGGGACGCTGTCTGTCCTTGGGTCCCCCCAAGGGCTGGCATGTGATGTTACGTACGGAGGACGGAATCATTACCGCCGCCAAACAGGCGGCGTCAAAGCTCATCTGTTGCCGCGAGCCGCTGACGCCGTTGGGATACGCTGTTATTTTGTTGCCCGAGCCACGTCGCGATCACCATGATGGCATGGTGGCTACCCCGTACGTGGTTTTTATGGGTCGC…
US26
ATGCGCCAGTCCTATCGCTACGCGTCTGGGGCCGTTGTTCGGAGGACCCTCAAGGGTTTACGAAAGCTCATTCTCTGCCAAGACTTGCGGCAGGACATCCGCCACTTAGTTCGTAGCTATGCTGATATGAACATTAGCCTTCCCGTTTCAGCGCCACCCGGATGGCGTCTAGATTTTGTAGAGTTTGAGGACATCTTTGGCAGCGCGGCTGTCACCGACGGGCCCGAAACGCCCTGGGGTCAGCTCATCTGCTGCGAAGAGTCGCTCGAGTCTCTGGGCGTCCTGCAGTTCTCTACCACCGTGTTGCCCAGAGTACACGGGCCGCGGTCCTCTTCTGAGGACGAGGACTCGGACGATGACGACTTTTTCGTATATGTAGAGGAAATTGAGCCACCTAGC…
US27
ATGACTACATCTACTACAACTACCACTAATATCATGCTACAGGTGAGCAACGTAACGAATCACACCTTGAATAGCACCGAAATTTATCAGTTGTTCGAGTACACTCGGTTCGGGGTATGGTTGATGTGCATCGTGGGCACGTTTCTGAACATGCTGGTGATTACCACCATCCTGTACTACCGTCGTAAGAAAAAATCTCCGAGCGATACCTACATCTGCAACCTGGCTGTAGCCGATCTGTTGATTGTCGTCGGCCTGCCGTTTTTTCTAGAATATGCCAAGCATCACCCCAAACTCAGCCGAGAGGTGGTTTGTTCGGGACTCAACGCTTGTTTCTACATCTGTCTTTTTGCCGGCGTTTGTTTTCTCATCAACCTGTCGATGGATCGCTATTGCGTC…
US28
ATGACACCGACGACGACGACCGCGGAACTCACGACGGAGTTTGACTACGATGAAGACGCGACTCCTTGTGTTTTCACCGACGTGCTTAATCAGTCAAAGCCAGTTACGTTGTTTCTGTACGGCGTTGTCTTTCTCTTCGGTTCCATCGGCAACTTCTTGGTGATCTTCACCATCACCTGGCGACGTCGGATTCAATGCTCCGGCGATGTTTACTTTATCAACCTCGCGGCCGCCGATTTGCTTTTCGTTTGTACACTACCTCTGTGGATGCAATACCTCCTAGATCACAACTCCCTAGCCAGCGTGCCGTGTACGTTACTCACTGCCTGTTTCTACGTGGCTATGTTTGCCAGTTTGTGTTTTATCACGGAGATTGCACTCGATCGCTACTACGCTATT…
US29
ATGCGGTGTTTCCGATGGTGGCTCTACAGTGGGTGGTGGTGGCTCACGTTTGGATGTGCTCGGACCGTGACGGTGGGTTTCGTCGCGCCCACGGTCCGGGCACAATCAACCGTGGTCCGCTCTGAGCCGGCTCCGCCGTCGGAAACCCGACGAGACAACAATGACACGTCTTACTTCAGCAGCACCTCTTTCCATTCTTCCGTGTCCCCTGCCACCTCAGTGGACCGTCAATTTCGACGGACCACGTACGACCGTTGGGACGGTCGACGTTGGCTGCGTACCCGCTACGGGAACGCCAGCGCCTGCGTGACGGGCACCCAATGGAGCACCAACTTTTTTTTCTCTCAGTGTGAGCACTATCCTAGTTTCGTGAAACTCAACGGGGTGCAGCGCTGGACA…
US30
ATGGGGAACCCCCGGAGCCCGCTCGATCGACGGCTACGGTTCAGGAATGTACCGTTCTTACCGCCCCGAATTGCGGCATCGTCAACAACGACGGCGCGGTCTCTGAAGGCCAAGACCATGGAGATGCGGTTCACCATAGCCTGGATGTGGTTTCCCAGTGTGCTGCTGATACTGGGGTTGTTGACACCTCCGAGTAACGGGTGCACCGTCGATGTTGGACGAAACGTATCCATTCGAGAACAGTGCCGCCTTCGAAACGGTGCGACGTTCTCCAAGGGAGACATCGAAGGTAACTTCAGTGGGCCCGTCGTCGTGGAGTTGGACTACGAAGACATCGATATTACTGGCGAACGGCAGCGACTTCGGTTCCATCTCAGCGGACTCGGGTGTCCTACAAAG…
US31
ATGTCGCTCTTGGAGCGCGAAGAGAGTTGGCGTCGCGTAGTCGACTACTCGCACAACCTGTGGTGTACGTGCGGTAACTGGCAAAGCCACGTTGAGATTCAGGACGAGGAGCCCAACTGCGAGCAGCCGGAGCCCGCACACTGGCTAGAATACGTGGCGGTCCAGTGGCAGGCCCGGGTTCGCGATTCTCACGATCGCTGGTGTCTCTGCAACGCCTGGCGTGATCACGCCTTGCGCGGCCGTTGGGGTACGGCGTATTCCTCGGGTTCCTCGGCCTCTTCCTCCGGTTTCGTCGCGGAGAGCAAGTTCACCTGGTGGAAACGACTGCGCCACAGTACCCGGCGCTGGTTGTTTCGCCGCCGGCGAGCTCGATACACTCCGTCTAACTGTGGGGAAAGT…
US32
ATGGCTATGTACACATCCGAATCCGAACGCGACTGGCGTCGTGTAATCCACGACTCGCACGGCCTGTGGTGCGATTGCGGCGACTGGCGAGAGCACCTCTATTGTGTGTACGACAGCCATTTTCAGCGACGACCCACGACCCGAGCCGAACGGAGGGCCGCCAATTGGCGGCGACAGATGCGGCGGTTACACCGTCTGTGGTGTTTTTGTCAGGACTGGAAGTGTCACGCGTTATACGCCGAGTGGGACGGCAAAGAATCCGACGACGAGTCGTCGGCGTCTTCCTCGGGCGAAGCGCCAGAGCAACAGGTCCCCGCTTGGAAGACCGTGCGAGCCTTCTCGCGGGCCTACCACCACCGCATTAACCGGGGTCTGCGGGGCACGCCCCCACCGCGCAAC…
US33A
ATGAGCCTCAGGTTCCCCGAGAGGGCGGGTTACGAGAAACTGGGATACCGCCCGCATGCCAAACGCGTGTGGGTGCATGACCCGTTGGGATTGACGCGGTTTATCATGAGGCAACTCATGATGTACCCGCTGGTGTTGCCGTTCACTTTTCCGTTTTACGTGCCGCGGTCC
US34
ATGAACTTAGAGCAACTCATCAACGTCCTTGGTCTGCTCGTCTGGATTGCCGCTCGTGCTGTCAGCCGCGTTGGTCCGCATGGCTCCGGACTCGTTTATCGTGAGCTTCATGATTTCTACGGGTATCTGCAGCTGGACCTTCTGGGACCAGTGGTGGCGGGGAATCGCTCAGTCCGGACCTGGAGAGAGCAGGCGGACCGAGCCAGAGGGACCTTCGTTCGGCGTTCAGGCCTTAATACTAGCCACATCTTACCTGTCGGCGGCCTGTCTGGGGGCTCCGGTACCTTACCCGCCGGCCTGTATCGTCCCGAAGAAGAGGTGTTCCTCCTCTTGAACCGCTGCCATGGGCCACTGTCAACGCCGAAAAGCGCTTGTCTGGCTGAGGTTGGTGTCGCTAAT…
US34A
ATGCTGAAATTCTTCTTAAAATTACGTAAACGACGTCGTCCAGTCGTTGTGCCGCGATTCGTACGGTTCATCGTCTACGTCGTTTTGTTCACCGTCGCTGTGCAACGCGTGAAACAAGAGCGTGATGCGCACCTTCGGCGGTATGAAGAACGATTGCAGAAAAACCGTGCACGGCGTCGGCAGAGTTTTCCG
TRS1
ATGGCCCAGCGCAACGGCATGTCGCCGCGCCCCCCGCCCCTCGGTCGCGGCCGCGGGGCCGGAGGGCCTTCGGGGGTTGGTTCCTCTCCTCCTTCTTCTTGTGTGCCGATGGGAGCGACGTCAACAGCGGGCACTGGTGCGAGTGCTGCGCCTACGGCGACGCCGGGCCACGGCGTCCACCGGGTAGAACCCCGCGGGCCGCCGGGCGCCCCTCCGAGTAGCGGCAACAACAGCAACTTTTGGCACGGCCCGGAGCGCCTGTTGCTGTCTCAGATTCCGGTGGAGCGCCAGGCGCTGACGGAGCTGGAATACCAGGCCATGGGCGCCGTGTGGCGCGCGGCGTTTCTGGCCAACAGCACGGGCCGCGCCATGCGCAAGTGGTCGCAGCGCGACGCGGGC…
ORFL147C
ATGTCTCTGGCCGGCGCCAGACCGGACGACAGCGTCTCGTACGTGAGCGAGTCGAGTCATGGAGATGAATTTGTTACAGAAACTATGCGTAGTGTGTTCGAAATGCAACGAATACGCCATGGAGCTGGAGTGTCTAAAGTACTGCGATCCGAACGTGTTACTGGCGGAGTCCACGCCGTTCAAGAGAAACGCGGCGGCTATAGTGTATCTGTACCGGAAGATCTACCCGGAGGTGGTGGCGCAGAATCGTACGCAGAGTTCGCTGCTGACTCTCTATCTGGAGATGCTGCTGAAGGCGCTGCACGAGGATACGGCTTTGCTGGATCGGGCGCTGATGGCCTACTCGCGCCAGCCGGACCGGGCGGCCTTCTACCGTACCGTCCTCCGTTTGGATCGCTG…
ORFS343C.iORF1
ATGAAGCGGCCGTGGTGGCCGTGCTGGGCTGGGTGCATCGCTTCGAGGTTGTCGTCCGAATCGCCGGCTTGCTCCTCTTCCAAATCTCCACGGCGGTGGCCGTCTTGGGTAGCTTCTCTCTGGTCTTCCCTACAGCGACTCTCAAGTCGCGTCCGGGCTTTCCTTGTCACGTTGTCTGGGCGCCCGAGGTGCTCCTCCTGGTGCCTGTGGCCTCCGCGCTCTTCGTGTATTTCCGCTATGAGCGACCGGTTCTCGCTCAGCGAAACCGGCACCCGCGCTGCCGTCGTCCGTTCCGACAGCTGGTGCTATTACTCGCCGGCCTCCTGGCGCACATCCCGGCGC

## Sheet: Supplementary File 1E
Gene	Oligonucleotide 1 / Forward primer (5'-3')	Oligonucleotide 2/ Reverse Primer (5'-3')	Template	Primers for QPCR (5'-3')
US1	GAW-CMVp-F	attB2-V5-R	Adenoviral vector library
US2	GAW-CMVp-F	attB2-V5-R	Adenoviral vector library
US3	GAW-CMVp-F	attB2-V5-R	Adenoviral vector library
US6	GAW-CMVp-F	attB2-V5-R	Adenoviral vector library
US7	GAW-CMVp-F	attB2-V5-R	Adenoviral vector library
US8	GAW-CMVp-F	attB2-V5-R	Adenoviral vector library
US9	GGGGACAAGTTTGTACAAAAAAGCAGGCTATGATCCTGTGGTCCCCG	GGGGACCACTTTGTACAAGAAAGCTGGGTTTATTACGTAGAATCAAGACCTAGGAGCGGGTTAGGGATTGGCTTACCAGCGCTATCGTCTTTAGCCTCTTCTTCC	HCMV Merlin BAC
US10	GAW-CMVp-F	attB2-V5-R	Adenoviral vector library
US11	GAW-CMVp-F	attB2-V5-R	Adenoviral vector library
US12	GAW-CMVp-F	attB2-V5-R	Adenoviral vector library
US13	GAW-CMVp-F	attB2-V5-R	Adenoviral vector library
US14	GAW-CMVp-F	attB2-V5-R	Adenoviral vector library
US15	GAW-CMVp-F	attB2-V5-R	Adenoviral vector library
US16	GAW-CMVp-F	attB2-V5-R	Adenoviral vector library
US17	GAW-CMVp-F	attB2-V5-R	Adenoviral vector library
US18	GAW-CMVp-F	attB2-V5-R	Adenoviral vector library	CTGATCAACACCGGCATCAC ; GCCAATCCCGATGACTTTCC
US19	GAW-CMVp-F	attB2-V5-R	Adenoviral vector library
US20	GAW-CMVp-F	attB2-V5-R	Adenoviral vector library
US21	GAW-CMVp-F	attB2-V5-R	Adenoviral vector library
US22	GAW-CMVp-F	attB2-V5-R	Adenoviral vector library
US23	GAW-CMVp-F	attB2-V5-R	Adenoviral vector library
US24	GAW-CMVp-F	attB2-V5-R	Adenoviral vector library
US26	GAW-CMVp-F	attB2-V5-R	Adenoviral vector library
US27	GAW-CMVp-F	attB2-V5-R	Adenoviral vector library
US28	GAW-CMVp-F	attB2-V5-R	Adenoviral vector library
US29	GAW-CMVp-F	attB2-V5-R	Adenoviral vector library
US30	GAW-CMVp-F	attB2-V5-R	Adenoviral vector library
US31	GAW-CMVp-F	attB2-V5-R	Adenoviral vector library
US32	GAW-CMVp-F	attB2-V5-R	Adenoviral vector library
US33A	GAW-CMVp-F	attB2-V5-R	Adenoviral vector library	GGGTTACGAGAAACTGGGATAC ; AACGGAAAAGTGAACGGCAA
US34	GAW-CMVp-F	attB2-V5-R	Adenoviral vector library
US34A	GAW-CMVp-F	attB2-V5-R	Adenoviral vector library
UL1	GAW-CMVp-F	attB2-V5-R	Adenoviral vector library
UL2	GAW-CMVp-F	attB2-V5-R	Adenoviral vector library	GAAGATGACGACGCATATCCG ; CGTCTCGAAGCAGCTTGAG
UL4	GAW-CMVp-F	attB2-V5-R	Adenoviral vector library
UL5	GAW-CMVp-F	attB2-V5-R	Adenoviral vector library
UL6	GAW-CMVp-F	attB2-V5-R	Adenoviral vector library
UL7	GAW-CMVp-F	attB2-V5-R	Adenoviral vector library
UL8	GAW-CMVp-F	attB2-V5-R	Adenoviral vector library
UL9	GAW-CMVp-F	attB2-V5-R	Adenoviral vector library	TGAAGCACAACACGACACTG ; CGCTGTATCGGTATTGTGTGA
UL10	GAW-CMVp-F	attB2-V5-R	Adenoviral vector library
UL11	GAW-CMVp-F	attB2-V5-R	Adenoviral vector library
UL13	GAW-CMVp-F	attB2-V5-R	Adenoviral vector library
UL14	GAW-CMVp-F	attB2-V5-R	Adenoviral vector library
UL15A	GAW-CMVp-F	attB2-V5-R	Adenoviral vector library
UL16	GAW-CMVp-F	attB2-V5-R	Adenoviral vector library
UL17	GAW-CMVp-F	attB2-V5-R	Adenoviral vector library
UL18	GAW-CMVp-F	attB2-V5-R	Adenoviral vector library
UL19	GAW-CMVp-F	attB2-V5-R	Adenoviral vector library
UL20	GGGGACAAGTTTGTACAAAAAAGCAGGCTATGCTCGGGATACGGGCTATG	GGGGACCACTTTGTACAAGAAAGCTGGGTTTATTACGTAGAATCAAGACCTAGGAGCGGGTTAGGGATTGGCTTACCAGCGCTTGCTGGCATGCAGACCACC	HCMV Merlin BAC
UL21A	GAW-CMVp-F	attB2-V5-R	Adenoviral vector library
UL22A	GAW-CMVp-F	attB2-V5-R	Adenoviral vector library
UL23	GAW-CMVp-F	attB2-V5-R	Adenoviral vector library
UL24	GAW-CMVp-F	attB2-V5-R	Adenoviral vector library
UL25	GAW-CMVp-F	attB2-V5-R	Adenoviral vector library
UL26	GAW-CMVp-F	attB2-V5-R	Adenoviral vector library
UL27	GAW-CMVp-F	attB2-V5-R	Adenoviral vector library
UL29	GAW-CMVp-F	attB2-V5-R	Adenoviral vector library
UL30	GAW-CMVp-F	attB2-V5-R	Adenoviral vector library
UL30A	GAW-CMVp-F	attB2-V5-R	Adenoviral vector library
UL31	GAW-CMVp-F	attB2-V5-R	Adenoviral vector library
UL32	GAW-CMVp-F	attB2-V5-R	Adenoviral vector library
UL33	GAW-CMVp-F	attB2-V5-R	Adenoviral vector library	TACTCGAGCTGCACAGTAGG ; CATGGAAAAGATCAGCCCGG
UL34	GAW-CMVp-F	attB2-V5-R	Adenoviral vector library
UL35	GAW-CMVp-F	attB2-V5-R	Adenoviral vector library
UL36	GAW-CMVp-F	attB2-V5-R	Adenoviral vector library
UL37	GAW-CMVp-F	attB2-V5-R	Adenoviral vector library
UL38	GAW-CMVp-F	attB2-V5-R	Adenoviral vector library
UL40	GAW-CMVp-F	attB2-V5-R	Adenoviral vector library
UL41A	GAW-CMVp-F	attB2-V5-R	Adenoviral vector library
UL42	GAW-CMVp-F	attB2-V5-R	Adenoviral vector library
UL43	GAW-CMVp-F	attB2-V5-R	Adenoviral vector library
UL44	GAW-CMVp-F	attB2-V5-R	Adenoviral vector library
UL45	GAW-CMVp-F	attB2-V5-R	Adenoviral vector library
UL46	GAW-CMVp-F	attB2-V5-R	Adenoviral vector library
UL47	GAW-CMVp-F	attB2-V5-R	Adenoviral vector library
UL48-H1	GGGGACAAGTTTGTACAAAAAAGCAGGCTATGAAAGTCACACAGGCCAGCTGCC	GGGGACCACTTTGTACAAGAAAGCTGGGTTTATTACGTAGAATCAAGACCTAGGAGCGGGTTAGGGATTGGCTTACCAGCGCTGGGCAGGGCTCCCTCGTTGG	HCMV Merlin BAC
UL48-H2	GGGGACAAGTTTGTACAAAAAAGCAGGCTATGAACCCACGGAAACCGCAGGC	GGGGACCACTTTGTACAAGAAAGCTGGGTTTATTACGTAGAATCAAGACCTAGGAGCGGGTTAGGGATTGGCTTACCAGCGCTCAAAAGATAGAGAAACCGCATGTGTTG	HCMV Merlin BAC
UL48A	GAW-CMVp-F	attB2-V5-R	Adenoviral vector library	GACCGAGATCTCAGAGGCC ; CTATCATGCGCAACAGGTCC
UL49	GAW-CMVp-F	attB2-V5-R	Adenoviral vector library
UL50	GAW-CMVp-F	attB2-V5-R	Adenoviral vector library
UL51	GAW-CMVp-F	attB2-V5-R	Adenoviral vector library
UL52	GAW-CMVp-F	attB2-V5-R	Adenoviral vector library
UL53	GAW-CMVp-F	attB2-V5-R	Adenoviral vector library
UL54	GAW-CMVp-F	attB2-V5-R	Adenoviral vector library
UL55	-	-	Gene synthesis, followed by a linker and V5 tag, flanked by attB sequences from Integrated DNA Technologies
UL56	-	-	Gene synthesis, followed by a linker and V5 tag, flanked by attB sequences from Integrated DNA Technologies
UL57	GAW-CMVp-F	attB2-V5-R	Adenoviral vector library
UL69	GAW-CMVp-F	attB2-V5-R	Adenoviral vector library
UL70	GAW-CMVp-F	attB2-V5-R	Adenoviral vector library
UL71	GAW-CMVp-F	attB2-V5-R	Adenoviral vector library
UL72	GAW-CMVp-F	attB2-V5-R	Adenoviral vector library
UL73	GAW-CMVp-F	attB2-V5-R	Adenoviral vector library
UL74	GAW-CMVp-F	attB2-V5-R	Adenoviral vector library
UL74A	GAW-CMVp-F	attB2-V5-R	Adenoviral vector library
UL75	GAW-CMVp-F	attB2-V5-R	Adenoviral vector library
UL76	GAW-CMVp-F	attB2-V5-R	Adenoviral vector library
UL77	GAW-CMVp-F	attB2-V5-R	Adenoviral vector library
UL78	GAW-CMVp-F	attB2-V5-R	Adenoviral vector library
UL79	GAW-CMVp-F	attB2-V5-R	Adenoviral vector library
UL80	GAW-CMVp-F	attB2-V5-R	Adenoviral vector library
UL80.5	GGGGACAAGTTTGTACAAAAAAGCAGGCTATGTCGCACCCTCTGAGTGC	GGGGACCACTTTGTACAAGAAAGCTGGGTTTATTACGTAGAATCAAGACCTAGGAGCGGGTTAGGGATTGGCTTACCAGCGCTCTCGAGCTTATTGAGCGCAGC	HCMV Merlin BAC
UL82	GAW-CMVp-F	attB2-V5-R	Adenoviral vector library
UL83	GAW-CMVp-F	attB2-V5-R	Adenoviral vector library
UL84	GAW-CMVp-F	attB2-V5-R	Adenoviral vector library
UL85	GAW-CMVp-F	attB2-V5-R	Adenoviral vector library
UL86	GAW-CMVp-F	attB2-V5-R	Adenoviral vector library
UL87	GAW-CMVp-F	attB2-V5-R	Adenoviral vector library
UL88	GAW-CMVp-F	attB2-V5-R	Adenoviral vector library
UL89	GAW-CMVp-F	attB2-V5-R	Adenoviral vector library
UL91	GAW-CMVp-F	attB2-V5-R	Adenoviral vector library	CTTTGTCGACCGCCTCTTTC ; CAGGTGTTGCTTGTCTCCAC
UL92	GAW-CMVp-F	attB2-V5-R	Adenoviral vector library
UL93	GAW-CMVp-F	attB2-V5-R	Adenoviral vector library
UL94	GAW-CMVp-F	attB2-V5-R	Adenoviral vector library
UL95	GAW-CMVp-F	attB2-V5-R	Adenoviral vector library
UL96	GAW-CMVp-F	attB2-V5-R	Adenoviral vector library
UL97	GAW-CMVp-F	attB2-V5-R	Adenoviral vector library
UL98	GAW-CMVp-F	attB2-V5-R	Adenoviral vector library
UL99	GAW-CMVp-F	attB2-V5-R	Adenoviral vector library
UL100	GAW-CMVp-F	attB2-V5-R	Adenoviral vector library
UL102	GAW-CMVp-F	attB2-V5-R	Adenoviral vector library
UL103	GAW-CMVp-F	attB2-V5-R	Adenoviral vector library
UL104	GAW-CMVp-F	attB2-V5-R	Adenoviral vector library
UL105	GAW-CMVp-F	attB2-V5-R	Adenoviral vector library
UL111A	GAW-CMVp-F	attB2-V5-R	Adenoviral vector library
UL112	GGGGACAAGTTTGTACAAAAAAGCAGGCTATGGATCTGCCTACTACCG	GGGGACCACTTTGTACAAGAAAGCTGGGTTTATTACGTAGAATCAAGACCTAGGAGCGGGTTAGGGATTGGCTTACCAGCGCTATCGTCGAAAAACGCCGCG	cDNA of HFFs infected with HCMV (72h)
UL114	GAW-CMVp-F	attB2-V5-R	Adenoviral vector library
UL115	GAW-CMVp-F	attB2-V5-R	Adenoviral vector library
UL116	GAW-CMVp-F	attB2-V5-R	Adenoviral vector library
UL117	GAW-CMVp-F	attB2-V5-R	Adenoviral vector library
UL119	GAW-CMVp-F	attB2-V5-R	Adenoviral vector library
UL120	GAW-CMVp-F	attB2-V5-R	Adenoviral vector library
UL121	GAW-CMVp-F	attB2-V5-R	Adenoviral vector library
UL122	GAW-CMVp-F	attB2-V5-R	Adenoviral vector library
UL123	GAW-CMVp-F	attB2-V5-R	Adenoviral vector library
UL124	GAW-CMVp-F	attB2-V5-R	Adenoviral vector library
UL128	-	-	Gene synthesis, followed by a linker and V5 tag, flanked by attB sequences from Integrated DNA Technologies
UL130	GAW-CMVp-F	attB2-V5-R	Adenoviral vector library
UL131A	-	-	Gene synthesis, followed by a linker and V5 tag, flanked by attB sequences from Integrated DNA Technologies
UL132	GGGGACAAGTTTGTACAAAAAAGCAGGCTATGCCGGCCCCGCGGGGTC	GGGGACCACTTTGTACAAGAAAGCTGGGTTTATTACGTAGAATCAAGACCTAGGAGCGGGTTAGGGATTGGCTTACCAGCGCTGTCGTACTCGGGATCTCTGAGCGAG	HCMV Merlin BAC
UL133	GAW-CMVp-F	attB2-V5-R	Adenoviral vector library
UL135	GAW-CMVp-F	attB2-V5-R	Adenoviral vector library
UL136	GAW-CMVp-F	attB2-V5-R	Adenoviral vector library	Set 1: TGCGGCTGTCATTATCCTGA , CCATTTCCACCGTGTCGAAG; Set 2 (full-size amplicon): ATGTCAGTCAAGGGCGTGGAGAT ; TAGCGGGAGATACGGCGTTC; NOTE both failed to amplify UL136
UL138	GAW-CMVp-F	attB2-V5-R	Adenoviral vector library
UL139	GAW-CMVp-F	attB2-V5-R	Adenoviral vector library
UL140	GAW-CMVp-F	attB2-V5-R	Adenoviral vector library
UL141	GAW-CMVp-F	attB2-V5-R	Adenoviral vector library
UL142	GAW-CMVp-F	attB2-V5-R	Adenoviral vector library
UL144	GAW-CMVp-F	attB2-V5-R	Adenoviral vector library
UL145	GAW-CMVp-F	attB2-V5-R	Adenoviral vector library
UL146	GAW-CMVp-F	attB2-V5-R	Adenoviral vector library
UL147	GAW-CMVp-F	attB2-V5-R	Adenoviral vector library
UL147A	GAW-CMVp-F	attB2-V5-R	Adenoviral vector library
UL148	GAW-CMVp-F	attB2-V5-R	Adenoviral vector library
UL148A	GAW-CMVp-F	attB2-V5-R	Adenoviral vector library
UL148B	GAW-CMVp-F	attB2-V5-R	Adenoviral vector library
UL148C	GAW-CMVp-F	attB2-V5-R	Adenoviral vector library
UL148D	GAW-CMVp-F	attB2-V5-R	Adenoviral vector library
UL150	GAW-CMVp-F	attB2-V5-R	Adenoviral vector library
UL150A	-	-	Gene synthesis, followed by a linker and V5 tag, flanked by attB sequences from Integrated DNA Technologies
TRS1	GAW-CMVp-F	attB2-V5-R	Adenoviral vector library
RL1	GAW-CMVp-F	attB2-V5-R	Adenoviral vector library
RL5A	GAW-CMVp-F	attB2-V5-R	Adenoviral vector library
RL6	GAW-CMVp-F	attB2-V5-R	Adenoviral vector library
RL8A	GGGGACAAGTTTGTACAAAAAAGCAGGCTATGCCTCACGGCCATCTCC	GGGGACCACTTTGTACAAGAAAGCTGGGTTTATTACGTAGAATCAAGACCTAGGAGCGGGTTAGGGATTGGCTTACCAGCGCTGCTAAAAACAGCGGACAGTCC	HCMV Merlin BAC
RL9A	GGGGACAAGTTTGTACAAAAAAGCAGGCTATGTCTCTAGATGCCGCCAGC	GGGGACCACTTTGTACAAGAAAGCTGGGTTTATTACGTAGAATCAAGACCTAGGAGCGGGTTAGGGATTGGCTTACCAGCGCTGAGAAACAGCACGTAGGTCAGG	HCMV Merlin BAC	ATGTCTCTAGATGCCGCCAGCC ; TTAGAGAAACAGCACGTAGGTCA
RL10	GAW-CMVp-F	attB2-V5-R	Adenoviral vector library
RL11	GAW-CMVp-F	attB2-V5-R	Adenoviral vector library
RL12	GAW-CMVp-F	attB2-V5-R	Adenoviral vector library	CACCCCACTATGTCCCAGAT ; GTAAGAGCCCATGTAGTGCG
RL13	GAW-CMVp-F	attB2-V5-R	Adenoviral vector library
IRS1	GGGGACAAGTTTGTACAAAAAAGCAGGCTATGGCCCAGCGCAACGGC	GGGGACCACTTTGTACAAGAAAGCTGGGTTTATTACGTAGAATCAAGACCTAGGAGCGGGTTAGGGATTGGCTTACCAGCGCTATGATGAACGTGGTGAGGGGCG	HCMV Merlin BAC
ORFL147C	-	-	Gene synthesis, followed by a linker and V5 tag, flanked by attB sequences from Integrated DNA Technologies
ORFS343C	-	-	Gene synthesis, followed by a linker and V5 tag, flanked by attB sequences from Integrated DNA Technologies
GAW Control	GGGGACAAGTTTGTACAAAAAAGCAGGCTCCCAGGCGAGAACGTGTGCGTGGACAAGCGAGCAGCATACGAACCCAGCTTTCTTGTACAAAGTGGTCCCC	GGGGACCACTTTGTACAAGAAAGCTGGGTTCGTATGCTGCTCGCTTGTCCACGCACACGTTCTCGCCTGGGAGCCTGCTTTTTTGTACAAACTTGTCCCC	Annealed oligonucleotides 1 and 2 to generate a double stranded DNA sequence that can be inserted into pDONR223 by Gateway Cloning
GFP	GAW-CMVp-F	attB2-V5-R	Adenoviral vector library
UL25 truncated C-terminus	GGGGACAAGTTTGTACAAAAAAGCAGGCTATGTCGTCGCGGCGTCGCAG	GGGGACCACTTTGTACAAGAAAGCTGGGTTTATTACGTAGAATCAAGACCTAGGAGCGGGTTAGGGATTGGCTTACCAGCGCTGGATCGGCAGATTTGTTCGG	pHAGE-UL25-V5

## Sheet: Supplementary File 1F
Gene	Oligonucleotide 1 / Forward primer (5'-3')	Oligonucleotide 2/ Reverse Primer (5'-3')	Template	QPCR primers
TRIM22	GGGGACAAGTTTGTACAAAAAAGCAGGCTATGGATTTCTCAGTAAAGGTAGACA	GGGGACCACTTTGTACAAGAAAGCTGGGTAGGAGCTCGGTGGGCACACAGTCATG	IFN stimulated cDNA
MBNL1	GGGGACAAGTTTGTACAAAAAAGCAGGCTATGGCTGTTAGTGTCACACC	GGGGACCACTTTGTACAAGAAAGCTGGGT TTAAGCGTAATCTGGAACATCGTATGGGTAAGCGCTCTACATCTGGGTAACATACTTG	pDONR221-MBLN1 (Harvard PlasmID HsCD00079833)
CELF1	GGGGACAAGTTTGTACAAAAAAGCAGGCTATGAACGGCACCCTGGACCAC	GGGGACCACTTTGTACAAGAAAGCTGGGT TTAAGCGTAATCTGGAACATCGTATGGGTAAGCGCTTCAGTAGGGCTTGCTGTCATTC	pDONR221-CUGBP1 (Harvard PlasmID HsCD00039403)
CUL4A	GGGGACAAGTTTGTACAAAAAAGCAGGCTATGGCGGACGAGGCCCCG	GGGGACCACTTTGTACAAGAAAGCTGGGT TTAAGCGTAATCTGGAACATCGTATGGGTAAGCGCTGGCCACGTAGTGGTACTGATTC	pOTB7-CUL4A (Harvard PlasmID HsCD00325140)
NEDD4L	GGGGACAAGTTTGTACAAAAAAGCAGGCTATGGCGACCGGGCTCGGGG	GGGGACCACTTTGTACAAGAAAGCTGGGTCTAGGCGTAGTCGGGCACGTCGTAGGGGTATCCTCCAGCGGCCGACACCCCTTCAAATCCTTGAGCATTTTCCACG	pCMV-SPORT6-NEDD4L (Harvard PlasmID HsCD00337956)
NCK1	GGGGACAAGTTTGTACAAAAAAGCAGGCTATGGCAGAAGAAGTGGTGGTAG	GGGGACCACTTTGTACAAGAAAGCTGGGT TTAAGCGTAATCTGGAACATCGTATGGGTAAGCGCTTGATAAATGCTTGACAAGATATAATTTTTC	pENTR223-NCK1 (Harvard PlasmID HsCD00370605)
NCK1 mtSH3-1 W38K	GGAATTTCGAACTCGCCACTTGGACTTAGAATCATCCAGA	TCTGGATGATTCTAAGTCCAAGTGGCGAGTTCGAAATTCC	pHAGE-NCK1-HA
NCK1 mtSH3-2 W143K	TTGTAGCTACCACGCCACTTCCCATCACTGCATTTCTC	GAGAAATGCAGTGATGGGAAGTGGCGTGGTAGCTACAA	pHAGE-NCK1-HA
NCK1 mtSH3-3 W229K	GATCTTCCTGCATTTCCACTTCTCTGGGTCATTTTCAGGT	ACCTGAAAATGACCCAGAGAAGTGGAAATGCAGGAAGATC	pHAGE-NCK1-HA
CNOT2	-	-	pDONR223-CNOT2 (Harvard PlasmID HsCD00080019)
CNOT7	-	-	pHAGE-CNOT7 (Harvard PlasmID HsCD00453329)
NEDD4	-	-	PHAGE-P-CMVt-N-HA Nedd4 wt (Addgene 24124)
LRFN3	-	-	pDONR221-LRFN3 (Harvard PlasmID HsCD00041564)
GAPDH	-	-	QPCR primers as positive controls of gene expression	AGGGCTGCTTTTAACTCTGG ; CCCCACTTGATTTTGGAGGGA
