# Supplementary material for: Human cytomegalovirus interactome analysis identifies degradation hubs, domain associations and viral protein functions
Source: eLife. 2019 Dec 24;8:e49894. doi: 10.7554/eLife.49894 (PMC6959991; doi:10.7554/eLife.49894)
Supplement: Supplementary file 3. — Columns give details of the database(s) that included each interaction, the method used, and cell type employed. Interactome scores from the present study are shown in columns H-K. Column L shows whether a given interaction was validated in this interactome. A value of 1 indicates validation; 0 indicates detection of the interaction but failure to pass stringent scoring thresholds; ‘ND’ indicates the interaction was not detected by the interactome. Column M shows the ranked abundance of each human prey protein from Supplementary file 1C. Interactions that were not detected in this study included a number of prey proteins that could not be detected in HFFFs. Further details are given in the Materials and methods section. [file elife-49894-supp3.xlsx]

## Sheet: Supplementary File 3
Gene Name bait	Gene Name prey	Databases	Interaction Detection Method	PubMed ID	Identified in cells infected with HCMV	Cell type	Average PSM	Entropy	z score	NWD score	Validated by interactome	Ranked abundance for human interactor B
UL115	UL74	UNIPROT	Immunoprecipitation	28403202	No	HFF	5	0.976021	0.259416	1.55853	1	Viral
UL74	UL115	UNIPROT	Immunoprecipitation	28403202	No	HFF	9.5	0.983708	2.21629	1.13463	1	Viral
UL73	UL100	UNIPROT	Immunoprecipitation	11090188	No	293T	25.5	0.939115	11.3677	1.38235	1	Viral
UL100	UL73	UNIPROT	Immunoprecipitation	11090188	No	293T					ND	Viral
UL48A	UL86	UNIPROT	Immunoprecipitation	12552013	No	SF9	111	0.991629	2.51777	1.55463	1	Viral
UL86	UL48A	UNIPROT	Immunoprecipitation	12552013	No	SF9	4.5	0.992774	12.3291	92.7357	1	Viral
UL70	UL102	UNIPROT, MINT, INTACT, VIRUSMENTHA	Immunoprecipitation	12076828	No	BHK-21	70	0.998693	1.83603	1.54917	1	Viral
UL102	UL70	UNIPROT, MINT, INTACT	Immunoprecipitation	12076828	No	BHK-21	1	1	-0.298099	0.0844737	0	Viral
UL75	UL115	UNIPROT	Immunoprecipitation	17942555	Yes	HDF	43.5	0.920178	10.9448	2.42793	1	Viral
UL115	UL75	UNIPROT	Immunoprecipitation	17942555	Yes	HDF	10	0.973668	0.992124	0.930446	1	Viral
UL99	UL94	UNIPROT	Yeast Two-Hybrid	19345970	No	AH109	124	0.994362	9.24837	2.57121	1	Viral
UL94	UL99	UNIPROT	Yeast Two-Hybrid	19345970	No	AH109	5.5	0.994985	0.599015	8.06176	1	Viral
UL51	UL56	UNIPROT	Immunoprecipitation	23175377	Yes	HFF	58	0.996625	3.81843	0.999233	1	Viral
UL56	UL51	UNIPROT	Immunoprecipitation	23175377	Yes	HFF	1	1	0.743648	0.546589	1	Viral
UL70	UL105	UNIPROT, MINT, INTACT, VIRUSMENTHA	Immunoprecipitation	12076828	No	BHK-21	101.5	0.998596	2.38672	2.51477	1	Viral
UL105	UL70	UNIPROT	Immunoprecipitation	12076828	No	BHK-21	14	0.996566	0.582128	0.316072	0	Viral
UL47	UL48	UNIPROT	Immunoprecipitation	24829352	Yes	HFF	129	1	12.1658	3.90487	1	Viral
UL48	UL47	UNIPROT	Immunoprecipitation	24829352	Yes	HFF					ND	Viral
UL50	UL53	UNIPROT	Immunoprecipitation	24155370	Yes	HFF	22.5	0.99693	2.25374	4.24812	1	Viral
UL53	UL50	UNIPROT	Immunoprecipitation	24155370	Yes	HFF	16.5	0.92312	2.77756	0.135989	0	Viral
UL97	UL83	UNIPROT	Immunoprecipitation	17634236	Yes	HFF	5.5	0.954434	-0.236471	0.158528	0	Viral
UL29	UL38	UNIPROT	Immunoprecipitation	23236067	No	U2OS	26.5	0.979869	3.89329	0.831978	1	Viral
UL80	UL86	UNIPROT	Yeast Two-hybrid	8985337	No	PCY2	7.5	0.99718	-0.0379209	0.404107	0	Viral
UL86	UL80	UNIPROT	Yeast Two-hybrid	8985337	No	PCY2	7	1	-0.0226586	0.403782	0	Viral
UL44	UL114	UNIPROT	Immunoprecipitation	16022730, 18599070	Yes	Primary HFF, HE	26	0.998973	1.8025	0.596864	1	Viral
UL75	UL55	UNIPROT	Immunoprecipitation	27082872	Yes	HFF	3.5	0.988699	-0.0283045	0.587981	1	Viral
UL55	UL75	UNIPROT	Immunoprecipitation	27082872	Yes	HFF					ND	Viral
UL35	UL82	UNIPROT	Immunoprecipitation	15308743	Yes	HFF	8	1	-0.00948741	0.764974	1	Viral
UL82	UL35	UNIPROT	Immunoprecipitation	15308743	Yes	HFF	76.5	0.988992	4.9048	0.631393	1	Viral
UL84	UL122	UNIPROT	Immunoprecipitation	8289376 , 7933141	Yes	Hel	162.5	0.959374	5.06516	0.885491	1	Viral
UL54	UL44	UNIPROT	Immunoprecipitation	14671097	No	BL21	108	0.999939	3.93385	0.339758	1	Viral
UL44	UL54	UNIPROT, VIRUSMENTHA	Immunoprecipitation	14671097	No	BL21	86.5	0.999786	2.65768	0.498955	1	Viral
UL74	UL75	UNIPROT	Immunoprecipitation	28403202	No	HFF	16	1	1.70915	1.17693	1	Viral
UL75	UL74	UNIPROT	Immunoprecipitation	28403202	No	HFF	35	0.997709	2.53793	4.12349	1	Viral
UL105	UL102	UNIPROT	Immunoprecipitation	12076828	No	BHK-21	3.5	0.988699	-0.0600807	0.346405	0	Viral
UL102	UL105	UNIPROT, MINT, INTACT, VIRUSMENTHA	Immunoprecipitation	12076828	No	BHK-21	2	0	-0.0886063	0.106863	0	Viral
UL46	UL86	UNIPROT	Yeast Two-hybrid	8892863	No	PCY2	6.5	0.996317	-0.0626136	0.376203	0	Viral
UL86	UL46	UNIPROT	Yeast Two-hybrid	8892863	No	PCY2					ND	Viral
UL84	UL44	UNIPROT	Immunoprecipitation	17959680	Yes	HFF	38	0.998052	0.930635	0.201535	0	Viral
UL44	UL84	UNIPROT	Immunoprecipitation	17959680	Yes	HFF	9	0.991992	0.368524	0.220029	0	Viral
UL51	UL89	UNIPROT	Immunoprecipitation	23175377	Yes	HFF	35	0.999428	7.42211	0.267825	1	Viral
UL89	UL51	UNIPROT	Immunoprecipitation	23175377	Yes	HFF					ND	Viral
TRS1	UL44	UNIPROT	Immunoprecipitation	20444996	Yes	HFF	10.5	0.998509	-0.2492	0.105938	0	Viral
IRS1	UL44	UNIPROT	Immunoprecipitation	20444996	Yes	HFF	8	0.959687	-0.356458	0.0924705	0	Viral
UL104	UL89	UNIPROT	Immunoprecipitation	16282466	No	BL21	1	0	-0.494404	0.0321802	0	Viral
UL89	UL104	UNIPROT	Immunoprecipitation	16282466	No	BL21					ND	Viral
UL44	UL112	UNIPROT	Immunoprecipitation	20538862	Yes	HFF	12	0.924819	1.39411	0.0521307	0	Viral
UL112	UL44	UNIPROT	Immunoprecipitation	20538862	Yes	HFF	15	1	-0.0561362	0.12662	0	Viral
UL89	UL56	UNIPROT	Immunoprecipitation	11744697	Yes	-	2	0.881291	-0.159601	0.185553	0	Viral
UL56	UL89	UNIPROT	Immunoprecipitation	11744697	Yes	-	1	0	-0.494404	0.0321802	0	Viral
UL35	OGT	UNIPROT, BIOGRID, VIRUSMENTHA	Affinity-purification mass spectrometry	22072767	No	293A	49.5	0.999351	8.56517	0.327773	1	2673
UL27	PSME3	UNIPROT, BIOGRID, VIRUSMENTHA	Affinity-purification mass spectrometry	21320693	Yes	Primary HFFs	25	0.99889	10.9833	1.45838	1	900
UL29	MTA2	UNIPROT	Immunoprecipitation	20585571	Yes	HFF	126	0.918953	11.6575	1.28203	1	1005
UL87	POLR2M	UNIPROT, BIOGRID	Affinity-purification mass spectrometry	25544563	No	293T	9	0.991992	7.60994	1.66936	1	7109
UL87	POLR2G	UNIPROT, BIOGRID	Affinity-purification mass spectrometry	25544563	No	293T	12.5	0.998933	10.4365	1.55917	1	2238
UL141	PVR	UNIPROT	Surface plasmon resonance	23555243	No	-	16.5	0.994377	10.8495	2.47655	1	1629
UL38	TSC2	UNIPROT	Immunoprecipitation	18407068	Yes	HFF	76	0.955034	12.0581	3.89739	1	7545
UL83	IFI16	UNIPROT, INTACT	Immunoprecipitation	24237704	No	293T	129	0.986018	12.2255	4.20966	1	1325
UL36	UBR5	UNIPROT, VIRUSMENTHA	Affinity-purification mass spectrometry	22810585	No	293	74.5	0.979869	11.6548	4.44256	1	3595
UL35	VPRBP	UNIPROT, BIOGRID, VIRUSMENTHA	Affinity-purification mass spectrometry	22072767	No	293A	4.5	0.992774	8.58314	19.8216	1	4833
UL87	POLR2D	UNIPROT, BIOGRID	Affinity-purification mass spectrometry	25544563	No	293T	7.5	0.928362	10.1232	18.7396	1	2167
UL87	POLR2H	UNIPROT, BIOGRID	Affinity-purification mass spectrometry	25544563	No	293T	3	1	11.6939	29.8716	1	3000
UL36	DDX28	VIRUSMENTHA	Affinity-purification mass spectrometry	22810585	No	293	4	0.964079	12.3291	87.432	1	4481
UL16	MICB	UNIPROT	Purified protein binding assay	11239445	No	CV-1/EBNA	6.5	0.996317	12.3291	111.454	1	5057
UL82	DAXX	UNIPROT, BIOGRID, VIRUSMENTHA	Immunoprecipitation	11992005	No	293	8.5	0.997772	12.3291	127.453	1	2898
UL16	RAET1G	VIRUSMENTHA	Purified protein binding assay	19658097	No	CV1	1.5	0.954434	8.94777	10.4473	1
UL16	ULBP2	UNIPROT, VIRUSMENTHA	Purified protein binding assay	19424970	No	Cos-7	2.5	0.811278	7.60609	14.2141	1	2846
UL87	POLR2K	UNIPROT, BIOGRID	Affinity-purification mass spectrometry	25544563	No	293T	1.5	0.954434	6.70429	4.82652	1	1780
UL29	HDAC1	UNIPROT	Immunoprecipitation	20585571	Yes	HFF	23.5	0.946422	4.98023	0.0682115	1	2097
UL123	STAT2	UNIPROT, BIOGRID	Immunofluorescence	26559840	No	HFF	5.5	0.994985	4.42387	0.356994	1	6185
UL42	ITCH	UNIPROT, BIOGRID, VIRUSMENTHA	Immunoprecipitation	26555021	No	293T	9.5	0.983708	4.42817	0.477012	1	4624
UL122	RB1	UNIPROT, BIOGRID, VIRUSMENTHA	Yeast Two-hybrid	9671498	No	Y190	1	0	3.59383	0.162786	0	2204
UL27	PSMB6	UNIPROT, BIOGRID, VIRUSMENTHA	Affinity-purification mass spectrometry	21320693	Yes	Primary HFFs	11	0.950338	4.97475	0.0430619	1	485
UL36	GDI2	VIRUSMENTHA	Affinity-purification mass spectrometry	22810585	No	293	12	0.881291	6.30494	0.171488	1	627
UL87	POLR2A	UNIPROT, BIOGRID	Affinity-purification mass spectrometry	25544563	No	293T	39	0.977226	8.98844	0.299313	1	1416
UL87	POLR2B	UNIPROT, BIOGRID	Affinity-purification mass spectrometry	25544563	No	293T	24.5	0.997402	7.38248	0.24817	1	2117
UL87	POLR2C	UNIPROT, BIOGRID	Affinity-purification mass spectrometry	25544563	No	293T	6.5	0.996317	5.07846	0.300645	1	2163
UL87	POLR2E	UNIPROT, BIOGRID	Affinity-purification mass spectrometry	25544563	No	293T	9.5	0.998196	7.03677	0.239845	1	1049
UL87	POLR2I	UNIPROT, BIOGRID	Affinity-purification mass spectrometry	25544563	No	293T	4	1	5.80644	0.552766	1	3030
UL87	POLR2L	UNIPROT, BIOGRID	Affinity-purification mass spectrometry	25544563	No	293T	1	0	5.45594	0.609674	1	1047
UL97	CDH1	UNIPROT, BIOGRID, VIRUSMENTHA	Purified protein binding assay	20686030	No	-	1	0	3.82987	0.628099	1
UL135	ABI1	UNIPROT	Immunoprecipitation	25121749	Yes	HFF	1	0	5.91929	0.441732	1	3034
US32	DLG1	MINT	Proteomic peptide-phage display	24550280	No	-	1	1	2.11995	0.409133	0	2930
UL27	DDB1	UNIPROT, BIOGRID, VIRUSMENTHA	Affinity-purification mass spectrometry	21320693	Yes	Primary HFFs	32.5	0.995856	0.0963257	0.452713	1	564
UL27	UBR5	UNIPROT, BIOGRID, VIRUSMENTHA	Affinity-purification mass spectrometry	21320693	Yes	Primary HFFs	3.5	0.896038	0.384473	0.962918	1	3595
UL27	RAB1A	UNIPROT, BIOGRID, VIRUSMENTHA	Affinity-purification mass spectrometry	21320693	Yes	Primary HFFs	5.5	0.994985	2.69817	0.0380792	0	234
UL27	RAN	UNIPROT, BIOGRID, VIRUSMENTHA	Affinity-purification mass spectrometry	21320693	Yes	Primary HFFs	6.5	0.996317	3.13271	0.0835929	0	186
UL122	RPS17	UNIPROT, BIOGRID, VIRUSMENTHA	Affinity-purification mass spectrometry	22810585	No	293	12	1	2.99918	0.0691166	0	78
UL76	PSMD4	UNIPROT, BIOGRID, VIRUSMENTHA	Immunoprecipitation	23966401	Yes	Hel 299	1.5	0.954434	-1.04989	0.0161154	0	463
UL76	UBC	UNIPROT, BIOGRID, VIRUSMENTHA	Fluorescent Resonance Energy Transfer	23966401	No	293	3.5	0.988699	-0.953431	0.0205583	0	428
UL35	SART3	UNIPROT, BIOGRID, VIRUSMENTHA	Affinity-purification mass spectrometry	22072767	No	293A	1	1	-0.786254	0.022911	0	1833
UL122	MCM3	UNIPROT	Immunoprecipitation	20545442	No	U373MG	2.5	0.979869	-0.125585	0.0491134	0	1223
UL36	RAB10	VIRUSMENTHA	Affinity-purification mass spectrometry	22810585	No	293	1	1	1.01351	0.0597534	0	483
UL27	CBR1	UNIPROT, BIOGRID, VIRUSMENTHA	Affinity-purification mass spectrometry	21320693	Yes	Primary HFFs	3.5	0.988699	1.13463	0.0611369	0	915
UL123	TRIM5	UNIPROT, BIOGRID, VIRUSMENTHA	Immunoprecipitation	25412268	No	293	2.5	0.979869	1.85497	0.0775362	0	5972
UL27	PDIA4	UNIPROT, BIOGRID, VIRUSMENTHA	Affinity-purification mass spectrometry	21320693	Yes	Primary HFFs	11	0.978071	0.475016	0.0775874	0	148
UL123	PML	UNIPROT, BIOGRID, VIRUSMENTHA	Yeast Two-hybrid	9671498	No	Y190	3	0.940286	1.5701	0.0955623	0	1631
UL27	PSMD3	UNIPROT, BIOGRID, VIRUSMENTHA	Affinity-purification mass spectrometry	21320693	Yes	Primary HFFs	16.5	0.994377	1.10646	0.089236	0	879
UL27	PSMD2	UNIPROT, BIOGRID, VIRUSMENTHA	Affinity-purification mass spectrometry	21320693	Yes	Primary HFFs	31	1	2.22525	0.0971014	0	859
UL27	STAT3	UNIPROT, BIOGRID, VIRUSMENTHA	Affinity-purification mass spectrometry	21320693	Yes	Primary HFFs	5	1	1.76162	0.135796	0	2080
UL27	EP400	UNIPROT, BIOGRID, VIRUSMENTHA	Affinity-purification mass spectrometry	21320693	Yes	Primary HFFs	54.5	0.998509	1.53534	0.131686	0	5164
UL27	ACLY	UNIPROT, BIOGRID, VIRUSMENTHA	Affinity-purification mass spectrometry	21320693	Yes	Primary HFFs	64	0.998439	2.35023	0.148409	0	596
UL135	ABI2	UNIPROT	Immunoprecipitation	25121749	Yes	HFF	2	0	2.67777	0.103501	0	2985
UL135	TLN1	UNIPROT	Immunoprecipitation	25121749	Yes	HFF	74	0.99987	1.73879	0.161342	0	500
UL55	EGFR	UNIPROT	Immunoprecipitation	12879076	Yes	Hel	2	1	0.771167	0.170268	0	2491
UL35	DDB1	UNIPROT, BIOGRID, VIRUSMENTHA	Affinity-purification mass spectrometry	22072767	No	293A	12.5	0.998933	-0.14255	0.280761	0	564
UL36	MYO9A	VIRUSMENTHA	Affinity-purification mass spectrometry	22810585	No	293	6	0.840359	2.25696	0.384399	0	7778
UL114	SMARCB1	UNIPROT, BIOGRID, VIRUSMENTHA	Yeast Two-Hybrid, Immunoprecipation	22479537	Yes	HFF	1.5	0.954434	-0.274588	0.0274934	0	2754
UL122	CSNK2A1	UNIPROT, BIOGRID, VIRUSMENTHA	Affinity-purification mass spectrometry	22810585	No	293	1.5	0.954434	1.04551	0.101011	0	970
UL122	DYNLL1	UNIPROT, BIOGRID, VIRUSMENTHA	Affinity-purification mass spectrometry	22810585	No	293	1	0	0.903043	0.120905	0	316
UL122	DYNLL2	UNIPROT, BIOGRID, VIRUSMENTHA	Affinity-purification mass spectrometry	22810585	No	293	1	0	2.2468	0.160556	0	697
UL122	HSPA5	UNIPROT, BIOGRID, VIRUSMENTHA	Affinity-purification mass spectrometry	22810585	No	293	136.5	0.999914	-0.0673244	0.146061	0	9
UL122	KPNA3	UNIPROT, BIOGRID, VIRUSMENTHA	Affinity-purification mass spectrometry	22810585	No	293	11.5	0.988699	2.78986	0.0935273	0	725
UL27	ACTL6A	UNIPROT, BIOGRID, VIRUSMENTHA	Affinity-purification mass spectrometry	21320693	Yes	Primary HFFs	15.5	0.993651	1.84792	0.0446942	0	1215
UL27	FKBP10	UNIPROT, BIOGRID, VIRUSMENTHA	Affinity-purification mass spectrometry	21320693	Yes	Primary HFFs	20.5	0.989753	2.12166	0.0567482	0	246
UL27	HNRNPH3	UNIPROT, BIOGRID, VIRUSMENTHA	Affinity-purification mass spectrometry	21320693	Yes	Primary HFFs	1	0	1.45238	0.0805916	0	569
UL27	NUDT21	UNIPROT, BIOGRID, VIRUSMENTHA	Affinity-purification mass spectrometry	21320693	Yes	Primary HFFs	4	1	0.567324	0.0460671	0	443
UL27	PSMA3	UNIPROT, BIOGRID, VIRUSMENTHA	Affinity-purification mass spectrometry	21320693	Yes	Primary HFFs	7	0.948078	0.730007	0.0462184	0	383
UL27	PSMB4	UNIPROT, BIOGRID, VIRUSMENTHA	Affinity-purification mass spectrometry	21320693	Yes	Primary HFFs	11.5	0.998747	1.65874	0.0439767	0	928
UL27	PSMC4	UNIPROT, BIOGRID, VIRUSMENTHA	Affinity-purification mass spectrometry	21320693	Yes	Primary HFFs	19	0.998102	1.72803	0.104068	0	700
UL27	PSMC6	UNIPROT, BIOGRID, VIRUSMENTHA	Affinity-purification mass spectrometry	21320693	Yes	Primary HFFs	14.5	0.999198	1.62382	0.0751131	0	567
UL27	RUVBL1	UNIPROT, BIOGRID, VIRUSMENTHA	Affinity-purification mass spectrometry	21320693	Yes	Primary HFFs	4.5	0.992774	0.472766	0.0760677	0	864
UL27	RUVBL2	UNIPROT, BIOGRID, VIRUSMENTHA	Affinity-purification mass spectrometry	21320693	Yes	Primary HFFs	3	1	0.416048	0.0588617	0	1037
UL27	TMEM43	UNIPROT, BIOGRID, VIRUSMENTHA	Affinity-purification mass spectrometry	21320693	Yes	Primary HFFs	11.5	0.998747	1.8908	0.173445	0	680
UL36	ATAD3A	VIRUSMENTHA	Affinity-purification mass spectrometry	22810585	No	293	2.5	0.811278	0.48402	0.122303	0	1109
UL36	HNRNPH2	VIRUSMENTHA	Affinity-purification mass spectrometry	22810585	No	293	7.5	0.99718	-0.376806	0.0301195	0	936
UL36	HSPA5	VIRUSMENTHA	Affinity-purification mass spectrometry	22810585	No	293	104	0.988808	-0.486949	0.127493	0	9
UL36	NEFH	VIRUSMENTHA	Affinity-purification mass spectrometry	22810585	No	293	1	0	-0.0401928	0.0190407	0
UL36	RPS27	VIRUSMENTHA	Affinity-purification mass spectrometry	22810585	No	293	1.5	0.954434	-0.45159	0.02127	0	102
UL36	TUBB	VIRUSMENTHA	Affinity-purification mass spectrometry	22810585	No	293	7	0.987138	-0.298589	0.0454962	0	786
UL44	SMARCB1	UNIPROT, BIOGRID, VIRUSMENTHA	Immunoprecipitation	22479537	Yes	HFF	1	1	-0.59494	0.0224483	0	2754
UL27	TRRAP	UNIPROT, BIOGRID, VIRUSMENTHA	Affinity-purification mass spectrometry	21320693	Yes	Primary HFFs					ND	5579
UL111A	IL10RA	VIRUSMENTHA, UNIPROT	X-ray diffraction crystal structure	12093920 15837194	No	-					ND
UL122	CSNK2B	UNIPROT, BIOGRID, VIRUSMENTHA	Affinity-purification mass spectrometry	22810585	No	293					ND	749
UL122	ZMYND11	UNIPROT, BIOGRID, VIRUSMENTHA	Affinity-purification mass spectrometry	22810585	No	293					ND	7844
UL123	DAXX	UNIPROT, BIOGRID, VIRUSMENTHA	Immunoprecipitation	20444888	Yes	U373					ND	2898
UL123	HES1	UNIPROT, BIOGRID	Immunoprecipitation	28750047	Yes	NPC					ND	6639
UL123	SP100	UNIPROT, BIOGRID	Immunoprecipitation	28750047	No	293T					ND	5400
UL123	UBE2D1	UNIPROT, BIOGRID	Immunoprecipitation	28750047	Yes	NPC					ND
UL144	TRAF6	UNIPROT, BIOGRID, VIRUSMENTHA, MINT	Immunoprecipitation	19176615	No	HFF					ND	6698
UL144	TRIM23	UNIPROT, BIOGRID, VIRUSMENTHA	Immunoprecipitation	19176615	No	HFF					ND
UL16	RAET1L	VIRUSMENTHA	Purified protein binding assay	19658097	No	CV1					ND
UL21A	ANAPC7	UNIPROT, BIOGRID, VIRUSMENTHA	Affinity-purification mass spectrometry	22792066	Yes	MRC-5					ND	3268
UL21A	CDC23	UNIPROT, BIOGRID, VIRUSMENTHA	Affinity-purification mass spectrometry, Immunoprecipitation	22792066	Yes	MRC-5					ND	4247
UL21A	CDC27	UNIPROT, BIOGRID, VIRUSMENTHA	Affinity-purification mass spectrometry, Immunoprecipitation	22792066	Yes	MRC-5					ND	2965
UL27	KAT5	UNIPROT, BIOGRID, VIRUSMENTHA	Affinity-purification mass spectrometry	21320693	Yes	Primary HFFs					ND
UL27	WDR26	UNIPROT, BIOGRID, VIRUSMENTHA	Affinity-purification mass spectrometry	21320693	Yes	Primary HFFs					ND	2972
UL35	DDA1	UNIPROT, BIOGRID, VIRUSMENTHA	Affinity-purification mass spectrometry	22072767	No	293A					ND	2453
UL35	IPO4	UNIPROT, BIOGRID, VIRUSMENTHA	Affinity-purification mass spectrometry	22072767	No	293A					ND	3989
UL35	USP7	UNIPROT, BIOGRID, VIRUSMENTHA	Affinity-purification mass spectrometry, Immunoprecipitation	22072767	No	293A					ND	1440
UL36	ACTA2	VIRUSMENTHA	Affinity-purification mass spectrometry	22810585	No	293					ND
UL36	ACTG2	VIRUSMENTHA	Affinity-purification mass spectrometry	22810585	No	293					ND
UL36	CASP8	UNIPROT, VIRUSMENTHA	Affinity-purification mass spectrometry	22810585	No	293					ND	7695
UL36	IRS4	VIRUSMENTHA	Affinity-purification mass spectrometry	22810585	No	293					ND
UL36	RPS27L	VIRUSMENTHA	Affinity-purification mass spectrometry	22810585	No	293					ND
UL36	TUBA1A	VIRUSMENTHA	Affinity-purification mass spectrometry	22810585	No	293					ND
UL36	TUBA1C	VIRUSMENTHA	Affinity-purification mass spectrometry	22810585	No	293					ND	119
UL36	USP54	VIRUSMENTHA	Affinity-purification mass spectrometry	22810585	No	293					ND	6433
UL82	ATRX	UNIPROT, BIOGRID, VIRUSMENTHA	Immunoprecipitation	23135716	No	HepaRG					ND	4012
UL83	MNDA	INTACT	Immunoprecipitation	24237704	No	293T					ND
UL83	PYHIN1	INTACT	Immunoprecipitation	24237704	No	293T					ND
UL87	POLR2J	UNIPROT, BIOGRID	Affinity-purification mass spectrometry	25544563	No	293T					ND	2151
US11	DERL1	VIRUSMENTHA	Immunoprecipitation	15215856	No	Astocytoma					ND	2580
US11	TRAM1	UNIPROT, BIOGRID, VIRUSMENTHA	Immunoprecipitation	19121997	No	U373					ND	3826
US2	TRAM1	UNIPROT, BIOGRID, VIRUSMENTHA	Immunoprecipitation	19121997	No	U373					ND	3826
US3	PDIA2	UNIPROT, BIOGRID, VIRUSMENTHA	Immunoprecipitation	17055437	No	Hela					ND
US3	TAPBP	UNIPROT, BIOGRID, VIRUSMENTHA	Immunoprecipitation	17055437	No	Hela					ND	1734
