# Supplementary material for: Human cytomegalovirus interactome analysis identifies degradation hubs, domain associations and viral protein functions
Source: eLife. 2019 Dec 24;8:e49894. doi: 10.7554/eLife.49894 (PMC6959991; doi:10.7554/eLife.49894)
Supplement: Supplementary file 4. — (A) All enriched functional pathways amongst all human HCIPs (p<0.05, after Benjamini-Hochberg adjustment). Column D shows the bait(s) interacting with each pathway component. (B) Further details of viral baits interacting with components of each pathway. Two values are shown: ‘% interaction’, the percentage of human interactors of each bait that belonged to the pathway (relates to Figure 2, where viral baits are included if >33% of interactors belonged to a given pathway). ‘% function’ illustrates the percentage of proteins from the pathway that interacted with the bait (relates to Figure 2—figure supplement 1, where viral baits are included if >33% of the pathway components identified interacted with a given viral bait). Values of >33% are coloured in this table. The ‘count’ column shows the total number of interacting pathway members; Figure 2 and Figure 2—figure supplement 1 included data with counts ≥ 2. (C) All enriched functional pathways amongst human HCIPs from each temporal class (p<0.05, after Benjamini-Hochberg adjustment). Column E shows the bait(s) interacting with each pathway component. This data underlies Figure 2—figure supplement 2A. (D) Temporal interactions of viral bait and viral prey proteins. This data underlies Figure 2—figure supplement 2B. [file elife-49894-supp4.xlsx]

## Sheet: Supplementary File 4A
Term and associated Entrez Gene IDs	Gene Name	Description	Interacting baits
Cell-cell adherens junction p=0.0000000000398
153090	DAB2IP	Disabled homolog 2-interacting protein	US9
2810	SFN	14-3-3 protein sigma	UL56
10580	SORBS1	Sorbin and SH3 domain-containing protein 1	UL50
85377	MICALL1	MICAL-like protein 1	UL23
23650	TRIM29	Tripartite motif-containing protein 29	UL56, UL122, UL88
79180	EFHD2	EF-hand domain-containing protein D2	UL148D, UL56
10694	CCT8	T-complex protein 1 subunit theta	UL16
9414	TJP2	Tight junction protein ZO-2	UL56
10190	TXNDC9	Thioredoxin domain-containing protein 9	UL26
10755	GIPC1	PDZ domain-containing protein GIPC1	UL23, UL2
22905	EPN2	Epsin-2	UL8
6520	SLC3A2	4F2 cell-surface antigen heavy chain	UL148A
9101	USP8	Ubiquitin carboxyl-terminal hydrolase 8	US7
151963	MB21D2	Protein MB21D2	US12, UL100
57488	ESYT2	Extended synaptotagmin-2	UL147A
1824	DSC2	Desmocollin-2	UL56, US23
8971	H1FX	Histone H1x	UL44
9973	CCS	Copper chaperone for superoxide dismutase	UL45
832	CAPZB	F-actin-capping protein subunit beta	UL72, UL72
26156	RSL1D1	Ribosomal L1 domain-containing protein 1	RL6, UL9
301	ANXA1	Annexin A1	UL56
2060	EPS15	Epidermal growth factor receptor substrate 15	UL94
6455	SH3GL1	Endophilin-A2	IRS1
23647	ARFIP2	Arfaptin-2	US19
3303	HSPA1B	Heat shock 70 kDa protein 1B	UL70
64787	EPS8L2	Epidermal growth factor receptor kinase substrate 8-like protein 2	US34A
5694	PSMB6	Proteasome subunit beta type-6	UL27
90102	PHLDB2	Pleckstrin homology-like domain family B member 2	UL131A
5493	PPL	Periplakin	UL78, UL56, UL88, UL122, UL121, UL116
11187	PKP3	Plakophilin-3	UL56, UL88, UL148D, UL122, UL121, US23
54869	EPS8L1	Epidermal growth factor receptor kinase substrate 8-like protein 1	UL56
10006	ABI1	Abl interactor 1	UL135, UL50, US19
56061	UBFD1	Ubiquitin domain-containing protein UBFD1	RL6, UL50, US8
11336	EXOC3	Exocyst complex component 3	UL32
1000	CDH2	Cadherin-2	UL8, US12
4690	NCK1	Cytoplasmic protein NCK1	UL25
199731	CADM4	Cell adhesion molecule 4	US12
25945	NECTIN3	Nectin-3	UL8
9531	BAG3	BAG family molecular chaperone regulator 3	UL70
5756	TWF1	Twinfilin-1	UL56
1956	EGFR	Epidermal growth factor receptor	US12, US13, UL8
2319	FLOT2	Flotillin-2	UL26
3898	LAD1	Ladinin-1	UL56
1605	DAG1	Dystroglycan	UL86
1499	CTNNB1	Catenin beta-1	UL8
6282	S100A11	Protein S100-A11	US23
6643	SNX2	Sorting nexin-2	US1
6642	SNX1	Sorting nexin-1	UL16
57650	KIAA1524	Protein CIP2A	UL16
2125	EVPL	Envoplakin	UL56, UL88, UL122, US23
11344	TWF2	Twinfilin-2	US9, UL47, RL6, UL56, UL99
8428	STK24	Serine/threonine-protein kinase 24	US9
57142	RTN4	Reticulon-4	UL148A, UL148A
7529	YWHAB	14-3-3 protein beta/alpha	UL43
6712	SPTBN2	Spectrin beta chain, non-erythrocytic 2	UL56
392	ARHGAP1	Rho GTPase-activating protein 1	UL56, RL6
51031	GLOD4	Glyoxalase domain-containing protein 4	RL6
1969	EPHA2	Ephrin type-A receptor 2	UL20
26135	SERBP1	Plasminogen activator inhibitor 1 RNA-binding protein	UL2, US9
128866	CHMP4B	Charged multivesicular body protein 4b	UL33
324	APC	Adenomatous polyposis coli protein	UL94
114990	VASN	Vasorin	US14, UL8, US27
10211	FLOT1	Flotillin-1	UL26
85456	TNKS1BP1	182 kDa tankyrase-1-binding protein	UL72
11313	LYPLA2	Acyl-protein thioesterase 2	UL14, UL122, UL27
1399	CRKL	Crk-like protein	IRS1, RL6, UL57, UL2, UL47
357	SHROOM2	Protein Shroom2	US26
10458	BAIAP2	Brain-specific angiogenesis inhibitor 1-associated protein 2	UL80.5
10938	EHD1	EH domain-containing protein 1	ORFL147C
6386	SDCBP	Syntenin-1	UL148A, UL132, UL140, UL26
7534	YWHAZ	14-3-3 protein zeta/delta	UL43
4008	LMO7	LIM domain only protein 7	US26, US13
7531	YWHAE	14-3-3 protein epsilon	UL43
5817	PVR	Poliovirus receptor	UL141, UL148A, US7
50807	ASAP1	Arf-GAP with SH3 domain, ANK repeat and PH domain-containing protein 1	IRS1, UL150A, RL6, UL55, UL86, US9, UL105, UL2, UL30, UL56
4067	LYN	Tyrosine-protein kinase Lyn	UL20
5819	NECTIN2	Nectin-2	UL47
999	CDH1	Cadherin-1	UL97
5297	PI4KA	Phosphatidylinositol 4-kinase alpha	UL16, UL132, UL20
56904	SH3GLB2	Endophilin-B2	UL56, ORFL147C
Mitochondrion p=0.000000000581
4698	NDUFA5	NADH dehydrogenase [ubiquinone] 1 alpha subcomplex subunit 5	UL122, UL99
1191	CLU	Clusterin	UL88
27069	GHITM	Growth hormone-inducible transmembrane protein	UL16
51373	MRPS17	28S ribosomal protein S17, mitochondrial	UL44
36	ACADSB	Short/branched chain specific acyl-CoA dehydrogenase, mitochondrial	UL20, UL40
131474	CHCHD4	Mitochondrial intermembrane space import and assembly protein 40	UL70, UL102
27068	PPA2	Inorganic pyrophosphatase 2, mitochondrial	UL50
51081	MRPS7	28S ribosomal protein S7, mitochondrial	UL44
5019	OXCT1	Succinyl-CoA:3-ketoacid coenzyme A transferase 1, mitochondrial	UL56
5018	OXA1L	Mitochondrial inner membrane protein OXA1L	UL40
23446	SLC44A1	Choline transporter-like protein 1	UL148A
23464	GCAT	2-amino-3-ketobutyrate coenzyme A ligase, mitochondrial	UL20
57038	RARS2	Probable arginine--tRNA ligase, mitochondrial	UL20
89941	RHOT2	Mitochondrial Rho GTPase 2	UL74
3099	HK2	Hexokinase-2	UL56, UL27
3712	IVD	Isovaleryl-CoA dehydrogenase, mitochondrial	UL99
4313	MMP2	72 kDa type IV collagenase	UL40
204	AK2	Adenylate kinase 2, mitochondrial	UL70
1329	COX5B	Cytochrome c oxidase subunit 5B, mitochondrial	UL144
56997	COQ8A	Atypical kinase COQ8A, mitochondrial	UL139
2653	GCSH	Glycine cleavage system H protein, mitochondrial	RL6
80224	NUBPL	Iron-sulfur protein NUBPL	UL19
55361	PI4K2A	Phosphatidylinositol 4-kinase type 2-alpha	UL99, US27, RL6, UL20
100137049	PLA2G4B	Cytosolic phospholipase A2 beta	UL56
1384	CRAT	Carnitine O-acetyltransferase	RL6
10531	PITRM1	Presequence protease, mitochondrial	UL80.5, UL24, RL6, UL47, US7
84681	HINT2	Histidine triad nucleotide-binding protein 2, mitochondrial	RL6, UL47
83858	ATAD3B	ATPase family AAA domain-containing protein 3B	US22
5653	KLK6	Kallikrein-6	US23, UL56
4594	MUT	Methylmalonyl-CoA mutase, mitochondrial	UL77, ORFS343C
81855	SFXN3	Sideroflexin-3	UL8, US12
11000	SLC27A3	Long-chain fatty acid transport protein 3	UL148C, US21
85476	GFM1	Elongation factor G, mitochondrial	RL6, US7, UL45
4695	NDUFA2	NADH dehydrogenase [ubiquinone] 1 alpha subcomplex subunit 2	UL50
9054	NFS1	Cysteine desulfurase, mitochondrial	ORFL147C, US14
23788	MTCH2	Mitochondrial carrier homolog 2	RL8A, UL40
55037	PTCD3	Pentatricopeptide repeat domain-containing protein 3, mitochondrial	UL44
56922	MCCC1	Methylcrotonoyl-CoA carboxylase subunit alpha, mitochondrial	UL103
3420	IDH3B	Isocitrate dehydrogenase [NAD] subunit beta, mitochondrial	US12
5414	SEPT4	Septin-4	UL135
55210	ATAD3A	ATPase family AAA domain-containing protein 3A	US22
3313	HSPA9	Stress-70 protein, mitochondrial	UL80.5
54534	MRPL50	39S ribosomal protein L50, mitochondrial	UL84
84129	ACAD11	Acyl-CoA dehydrogenase family member 11	UL80.5
8655	DYNLL1	Dynein light chain 1, cytoplasmic	UL50
10730	YME1L1	ATP-dependent zinc metalloprotease YME1L1	UL16, UL40, US30
28998	MRPL13	39S ribosomal protein L13, mitochondrial	UL84, US9
55168	MRPS18A	28S ribosomal protein S18a, mitochondrial	UL132
7187	TRAF3	TNF receptor-associated factor 3	ORFL147C
25902	MTHFD1L	Monofunctional C1-tetrahydrofolate synthase, mitochondrial	ORFL147C, RL6
622	BDH1	D-beta-hydroxybutyrate dehydrogenase, mitochondrial	UL20, UL40
23095	KIF1B	Kinesin-like protein KIF1B	US12, US14, UL43
517	ATP5G2	ATP synthase F(0) complex subunit C2, mitochondrial	UL148A
515	ATP5F1	ATP synthase F(0) complex subunit B1, mitochondrial	UL78
128240	NAXE	NAD(P)H-hydrate epimerase	US23
55074	OXR1	Oxidation resistance protein 1	UL86
9377	COX5A	Cytochrome c oxidase subunit 5A, mitochondrial	UL144
26056	RAB11FIP5	Rab11 family-interacting protein 5	US26
140707	BRI3BP	BRI3-binding protein	UL148C
64083	GOLPH3	Golgi phosphoprotein 3	RL6
51031	GLOD4	Glyoxalase domain-containing protein 4	RL6
5566	PRKACA	cAMP-dependent protein kinase catalytic subunit alpha	UL14
9238	TBRG4	Protein TBRG4	UL16
22907	DHX30	Putative ATP-dependent RNA helicase DHX30	UL44
25996	REXO2	Oligoribonuclease, mitochondrial	US8
3329	HSPD1	60 kDa heat shock protein, mitochondrial	UL70
8659	ALDH4A1	Delta-1-pyrroline-5-carboxylate dehydrogenase, mitochondrial	UL47, UL45, UL56
2180	ACSL1	Long-chain-fatty-acid--CoA ligase 1	US23, UL14, UL135
55177	RMDN3	Regulator of microtubule dynamics protein 3	UL147A, UL40, UL82
54205	CYCS	Cytochrome c	UL56, UL33, RL6, US12, RL12
7818	DAP3	28S ribosomal protein S29, mitochondrial	UL44, UL30A, UL22A
54948	MRPL16	39S ribosomal protein L16, mitochondrial	UL135
91137	SLC25A46	Solute carrier family 25 member 46	UL148A
64087	MCCC2	Methylcrotonoyl-CoA carboxylase beta chain, mitochondrial	UL8, US12
91445	RNF185	E3 ubiquitin-protein ligase RNF185	UL148C
23597	ACOT9	Acyl-coenzyme A thioesterase 9, mitochondrial	UL14
81570	CLPB	Caseinolytic peptidase B protein homolog	UL23, UL40
57406	ABHD6	Monoacylglycerol lipase ABHD6	UL148C, US21
2182	ACSL4	Long-chain-fatty-acid--CoA ligase 4	UL86
25813	SAMM50	Sorting and assembly machinery component 50 homolog	UL40
593	BCKDHA	2-oxoisovalerate dehydrogenase subunit alpha, mitochondrial	UL38
26517	TIMM13	Mitochondrial import inner membrane translocase subunit Tim13	UL104
9512	PMPCB	Mitochondrial-processing peptidase subunit beta	UL14, RL6, UL122, UL27, UL38
5894	RAF1	RAF proto-oncogene serine/threonine-protein kinase	UL132
6464	SHC1	SHC-transforming protein 1	US22
55288	RHOT1	Mitochondrial Rho GTPase 1	UL74, UL40, UL47
60528	ELAC2	Zinc phosphodiesterase ELAC protein 2	RL6, ORFL147C
192111	PGAM5	Serine/threonine-protein phosphatase PGAM5, mitochondrial	UL40
8050	PDHX	Pyruvate dehydrogenase protein X component, mitochondrial	US7
28973	MRPS18B	28S ribosomal protein S18b, mitochondrial	UL44, UL121, UL80.5
2109	ETFB	Electron transfer flavoprotein subunit beta	UL50
23408	SIRT5	NAD-dependent protein deacylase sirtuin-5, mitochondrial	UL53
125988	MIC13	MICOS complex subunit MIC13	UL20, UL47
29957	SLC25A24	Calcium-binding mitochondrial carrier protein SCaMC-1	UL40, RL6
1347	COX7A2	Cytochrome c oxidase subunit 7A2, mitochondrial	UL144
708	C1QBP	Complement component 1 Q subcomponent-binding protein, mitochondrial	US30
10240	MRPS31	28S ribosomal protein S31, mitochondrial	UL44
55333	SYNJ2BP	Synaptojanin-2-binding protein	UL147A, US30
79751	SLC25A22	Mitochondrial glutamate carrier 1	UL40, UL20, UL4, US9
55794	DDX28	Probable ATP-dependent RNA helicase DDX28	UL36
2710	GK	Glycerol kinase	UL147A, UL16, UL40
25932	CLIC4	Chloride intracellular channel protein 4	UL71
26521	TIMM8B	Mitochondrial import inner membrane translocase subunit Tim8 B	UL104
2908	NR3C1	Glucocorticoid receptor	UL16
64432	MRPS25	28S ribosomal protein S25, mitochondrial	UL44
581	BAX	Apoptosis regulator BAX	UL84
10058	ABCB6	ATP-binding cassette sub-family B member 6, mitochondrial	UL148A, UL20
10965	ACOT2	Acyl-coenzyme A thioesterase 2, mitochondrial	UL14, UL122
80273	GRPEL1	GrpE protein homolog 1, mitochondrial	UL80.5
60488	MRPS35	28S ribosomal protein S35, mitochondrial	UL44
64975	MRPL41	39S ribosomal protein L41, mitochondrial	UL44
3954	LETM1	LETM1 and EF-hand domain-containing protein 1, mitochondrial	US34A, UL135
10105	PPIF	Peptidyl-prolyl cis-trans isomerase F, mitochondrial	ORFL147C, RL6
5493	PPL	Periplakin	UL78, UL56, UL88, UL122, UL121, UL116
84236	RHBDD1	Rhomboid-related protein 4	UL148
10102	TSFM	Elongation factor Ts, mitochondrial	US8
65005	MRPL9	39S ribosomal protein L9, mitochondrial	UL44
64978	MRPL38	39S ribosomal protein L38, mitochondrial	UL44, UL26
57129	MRPL47	39S ribosomal protein L47, mitochondrial	UL44
5498	PPOX	Protoporphyrinogen oxidase	UL86
102724023	C21orf33	ES1 protein homolog, mitochondrial	RL6
4357	MPST	3-mercaptopyruvate sulfurtransferase	RL6, UL47
29074	MRPL18	39S ribosomal protein L18, mitochondrial	UL44
23411	SIRT1	NAD-dependent protein deacetylase sirtuin-1	UL94
23410	SIRT3	NAD-dependent protein deacetylase sirtuin-3, mitochondrial	UL50
56945	MRPS22	28S ribosomal protein S22, mitochondrial	UL44, UL22A, UL26
56947	MFF	Mitochondrial fission factor	US34A, UL135
1371	CPOX	Oxygen-dependent coproporphyrinogen-III oxidase, mitochondrial	RL6, UL47
6342	SCP2	Non-specific lipid-transfer protein	US8
4704	NDUFA9	NADH dehydrogenase [ubiquinone] 1 alpha subcomplex subunit 9, mitochondrial	US14
10367	MICU1	Calcium uptake protein 1, mitochondrial	UL22A
91942	NDUFAF2	Mimitin, mitochondrial	US7, UL99, US34A, UL140
5521	PPP2R2B	Serine/threonine-protein phosphatase 2A 55 kDa regulatory subunit B beta isoform	UL71
5203	PFDN4	Prefoldin subunit 4	UL70
64965	MRPS9	28S ribosomal protein S9, mitochondrial	UL44
79934	COQ8B	Atypical kinase COQ8B, mitochondrial	US9
54832	VPS13C	Vacuolar protein sorting-associated protein 13C	UL99, UL148A, ORFL147C, UL86
29108	PYCARD	Apoptosis-associated speck-like protein containing a CARD	UL56, UL122
64960	MRPS15	28S ribosomal protein S15, mitochondrial	US22, UL94
126328	NDUFA11	NADH dehydrogenase [ubiquinone] 1 alpha subcomplex subunit 11	UL40
8996	NOL3	Nucleolar protein 3	UL148C
6041	RNASEL	2-5A-dependent ribonuclease	UL74
10845	CLPX	ATP-dependent Clp protease ATP-binding subunit clpX-like, mitochondrial	UL33
116228	COX20	Cytochrome c oxidase protein 20 homolog	UL16
57505	AARS2	Alanine--tRNA ligase, mitochondrial	UL16, UL14
10981	RAB32	Ras-related protein Rab-32	UL40, UL147A
54704	PDP1	[Pyruvate dehydrogenase [acetyl-transferring]]-phosphatase 1, mitochondrial	UL80.5
4716	NDUFB10	NADH dehydrogenase [ubiquinone] 1 beta subcomplex subunit 10	UL135
5096	PCCB	Propionyl-CoA carboxylase beta chain, mitochondrial	UL50
1159	CKMT1A	Creatine kinase U-type, mitochondrial	UL56, US23, UL56
2926	GRSF1	G-rich sequence factor 1	UL44
65993	MRPS34	28S ribosomal protein S34, mitochondrial	UL44, UL9, RL8A, UL135
60314	C12orf10	UPF0160 protein MYG1, mitochondrial	RL6, US7
5095	PCCA	Propionyl-CoA carboxylase alpha chain, mitochondrial	UL50, RL9A, UL102
4726	NDUFS6	NADH dehydrogenase [ubiquinone] iron-sulfur protein 6, mitochondrial	UL14
64949	MRPS26	28S ribosomal protein S26, mitochondrial	UL44
4720	NDUFS2	NADH dehydrogenase [ubiquinone] iron-sulfur protein 2, mitochondrial	UL14
8604	SLC25A12	Calcium-binding mitochondrial carrier protein Aralar1	UL8
90550	MCU	Calcium uniporter protein, mitochondrial	UL40
23564	DDAH2	N(G),N(G)-dimethylarginine dimethylaminohydrolase 2	UL40
5091	PC	Pyruvate carboxylase, mitochondrial	UL27
7157	TP53	Cellular tumor antigen p53	UL29, UL38
3980	LIG3	DNA ligase 3	RL8A, UL132, UL55, UL86
4722	NDUFS3	NADH dehydrogenase [ubiquinone] iron-sulfur protein 3, mitochondrial	UL8
5202	PFDN2	Prefoldin subunit 2	UL70
1678	TIMM8A	Mitochondrial import inner membrane translocase subunit Tim8 A	UL104
80347	COASY	Bifunctional coenzyme A synthase	US12, UL56
4285	MIPEP	Mitochondrial intermediate peptidase	UL14
8473	OGT	UDP-N-acetylglucosamine--peptide N-acetylglucosaminyltransferase 110 kDa subunit	UL35, UL82
64850	ETNPPL	Ethanolamine-phosphate phospho-lyase	UL22A, UL38
57103	TIGAR	Fructose-2,6-bisphosphatase TIGAR	US8
8801	SUCLG2	Succinate--CoA ligase [GDP-forming] subunit beta, mitochondrial	UL16
10455	ECI2	Enoyl-CoA delta isomerase 2, mitochondrial	ORFL147C
10456	HAX1	HCLS1-associated protein X-1	UL47, UL74, UL20, UL40, UL55, US9
441282	AKR1B15	Aldo-keto reductase family 1 member B15	UL56
51142	CHCHD2	Coiled-coil-helix-coiled-coil-helix domain-containing protein 2	US30
10452	TOMM40	Mitochondrial import receptor subunit TOM40 homolog	UL26
Nucleotide-binding p=0.00000000261
10999	SLC27A4	Long-chain fatty acid transport protein 4	UL148C
55236	UBA6	Ubiquitin-like modifier-activating enzyme 6	RL6, UL30
23517	SKIV2L2	Superkiller viralicidic activity 2-like 2	US26
60625	DHX35	Probable ATP-dependent RNA helicase DHX35	UL22A
5634	PRPS2	Ribose-phosphate pyrophosphokinase 2	US12
51776	ZAK	Mitogen-activated protein kinase kinase kinase MLT	US26
59341	TRPV4	Transient receptor potential cation channel subfamily V member 4	UL148C
538	ATP7A	Copper-transporting ATPase 1	US27, UL100
4619	MYH1	Myosin-1	US28
3099	HK2	Hexokinase-2	UL56, UL27
203	AK1	Adenylate kinase isoenzyme 1	RL6, US28, UL132, UL47, US23
1186	CLCN7	H(+)/Cl(-) exchange transporter 7	US8, UL40
204	AK2	Adenylate kinase 2, mitochondrial	UL70
6782	HSPA13	Heat shock 70 kDa protein 13	UL20
51560	RAB6B	Ras-related protein Rab-6B	US27
3094	HINT1	Histidine triad nucleotide-binding protein 1	RL6, UL47, UL132
55226	NAT10	RNA cytidine acetyltransferase	UL132
4216	MAP3K4	Mitogen-activated protein kinase kinase kinase 4	UL94
80224	NUBPL	Iron-sulfur protein NUBPL	UL19
55361	PI4K2A	Phosphatidylinositol 4-kinase type 2-alpha	UL99, US27, RL6, UL20
3716	JAK1	Tyrosine-protein kinase JAK1	UL20
26007	TKFC	Triokinase/FMN cyclase	UL50
29904	EEF2K	Eukaryotic elongation factor 2 kinase	UL94
84681	HINT2	Histidine triad nucleotide-binding protein 2, mitochondrial	RL6, UL47
545	ATR	Serine/threonine-protein kinase ATR	UL16
85476	GFM1	Elongation factor G, mitochondrial	RL6, US7, UL45
547	KIF1A	Kinesin-like protein KIF1A	UL89
51762	RAB8B	Ras-related protein Rab-8B	US7, UL13, UL147
374868	ATP9B	Probable phospholipid-transporting ATPase IIB	US27
7203	CCT3	T-complex protein 1 subunit gamma	UL70
440275	EIF2AK4	eIF-2-alpha kinase GCN2	UL150A
56922	MCCC1	Methylcrotonoyl-CoA carboxylase subunit alpha, mitochondrial	UL103
1457	CSNK2A1	Casein kinase II subunit alpha	UL84
1459	CSNK2A2	Casein kinase II subunit alpha'	UL84, UL135, US7, UL22A, US34A
1452	CSNK1A1	Casein kinase I isoform alpha	UL56
55210	ATAD3A	ATPase family AAA domain-containing protein 3A	US22
7327	UBE2G2	Ubiquitin-conjugating enzyme E2 G2	US14
6891	TAP2	Antigen peptide transporter 2	US21
7328	UBE2H	Ubiquitin-conjugating enzyme E2 H	RL6
23011	RAB21	Ras-related protein Rab-21	US27, UL100, RL6, UL148A
10730	YME1L1	ATP-dependent zinc metalloprotease YME1L1	UL16, UL40, US30
7332	UBE2L3	Ubiquitin-conjugating enzyme E2 L3	RL6, UL47, US8, UL56, US7
25902	MTHFD1L	Monofunctional C1-tetrahydrofolate synthase, mitochondrial	ORFL147C, RL6
7334	UBE2N	Ubiquitin-conjugating enzyme E2 N	RL6, UL56
5347	PLK1	Serine/threonine-protein kinase PLK1	UL132
7048	TGFBR2	TGF-beta receptor type-2	UL20, UL140
85441	HELZ2	Helicase with zinc finger domain 2	UL9, UL132, UL19, UL56, UL150A
7046	TGFBR1	TGF-beta receptor type-1	UL20
4233	MET	Hepatocyte growth factor receptor	UL20
55661	DDX27	Probable ATP-dependent RNA helicase DDX27	UL44
23113	CUL9	Cullin-9	US30
128240	NAXE	NAD(P)H-hydrate epimerase	US23
8428	STK24	Serine/threonine-protein kinase 24	US9
79834	PEAK1	Pseudopodium-enriched atypical kinase 1	UL94
5898	RALA	Ras-related protein Ral-A	UL140, UL130
10212	DDX39A	ATP-dependent RNA helicase DDX39A	UL27, UL122, UL14
22907	DHX30	Putative ATP-dependent RNA helicase DHX30	UL44
55207	ARL8B	ADP-ribosylation factor-like protein 8B	US27
10079	ATP9A	Probable phospholipid-transporting ATPase IIA	UL148A, US30
4621	MYH3	Myosin-3	US28
4620	MYH2	Myosin-2	US28
4622	MYH4	Myosin-4	US28
908	CCT6A	T-complex protein 1 subunit zeta	UL70
4625	MYH7	Myosin-7	US28
51184	GPN3	GPN-loop GTPase 3	UL74
4624	MYH6	Myosin-6	US28
64087	MCCC2	Methylcrotonoyl-CoA carboxylase beta chain, mitochondrial	UL8, US12
81570	CLPB	Caseinolytic peptidase B protein homolog	UL23, UL40
55902	ACSS2	Acetyl-coenzyme A synthetase, cytoplasmic	RL6
115	ADCY9	Adenylate cyclase type 9	US8, UL148C
112	ADCY6	Adenylate cyclase type 6	UL148
201475	RAB12	Ras-related protein Rab-12	US27, UL100
6597	SMARCA4	Transcription activator BRG1	US26
26038	CHD5	Chromodomain-helicase-DNA-binding protein 5	UL29
8467	SMARCA5	SWI/SNF-related matrix-associated actin-dependent regulator of chromatin subfamily A member 5	UL9, UL45
55601	DDX60	Probable ATP-dependent RNA helicase DDX60	UL56, UL71
9493	KIF23	Kinesin-like protein KIF23	US26, UL20
102800317	CSNK1E	Casein kinase I isoform epsilon	UL148D
701	BUB1B	Mitotic checkpoint serine/threonine-protein kinase BUB1 beta	US14
89797	NAV2	Neuron navigator 2	UL94
439	ASNA1	ATPase ASNA1	RL8A
339122	RAB43	Ras-related protein Rab-43	US27
55794	DDX28	Probable ATP-dependent RNA helicase DDX28	UL36
5605	MAP2K2	Dual specificity mitogen-activated protein kinase kinase 2	UL14, RL6
27032	ATP2C1	Calcium-transporting ATPase type 2C member 1	US27, UL8
10058	ABCB6	ATP-binding cassette sub-family B member 6, mitochondrial	UL148A, UL20
27175	TUBG2	Tubulin gamma-2 chain	UL14, US9
2260	FGFR1	Fibroblast growth factor receptor 1	UL20
10575	CCT4	T-complex protein 1 subunit delta	UL70
6196	RPS6KA2	Ribosomal protein S6 kinase alpha-2	UL26
445	ASS1	Argininosuccinate synthase	UL132, ORFL147C, UL150A, UL19, UL56, UL105, US9, UL55
10576	CCT2	T-complex protein 1 subunit beta	UL70
6197	RPS6KA3	Ribosomal protein S6 kinase alpha-3	UL26, UL25
8634	RTCA	RNA 3'-terminal phosphate cyclase	UL40, US12
10574	CCT7	T-complex protein 1 subunit eta	UL70
6195	RPS6KA1	Ribosomal protein S6 kinase alpha-1	UL26
9319	TRIP13	Pachytene checkpoint protein 2 homolog	US9, UL20
3704	ITPA	Inosine triphosphate pyrophosphatase	RL6
59	ACTA2	Actin, aortic smooth muscle	UL99, US9
65985	AACS	Acetoacetyl-CoA synthetase	RL6
6793	STK10	Serine/threonine-protein kinase 10	UL13, US7
51251	NT5C3A	Cytosolic 5'-nucleotidase 3A	UL56
7273	TTN	Titin	US28, UL55
7083	TK1	Thymidine kinase, cytosolic	US9
345651	ACTBL2	Beta-actin-like protein 2	UL138
63826	SRR	Serine racemase	UL20
10845	CLPX	ATP-dependent Clp protease ATP-binding subunit clpX-like, mitochondrial	UL33
5906	RAP1A	Ras-related protein Rap-1A	RL6
4343	MOV10	Putative helicase MOV-10	UL6, UL19, UL44, UL9
10981	RAB32	Ras-related protein Rab-32	UL40, UL147A
259217	HSPA12A	Heat shock 70 kDa protein 12A	UL147A, UL20
79877	DCAKD	Dephospho-CoA kinase domain-containing protein	UL148C
9730	VPRBP	Protein VPRBP	UL35, US30
3980	LIG3	DNA ligase 3	RL8A, UL132, UL55, UL86
79876	UBA5	Ubiquitin-like modifier-activating enzyme 5	ORFL147C
8476	CDC42BPA	Serine/threonine-protein kinase MRCK alpha	UL74
80347	COASY	Bifunctional coenzyme A synthase	US12, UL56
4288	MKI67	Proliferation marker protein Ki-67	UL9, US13, UL80.5, UL20, RL8A, UL32, UL86, UL150A, US27, RL6, UL105
8801	SUCLG2	Succinate--CoA ligase [GDP-forming] subunit beta, mitochondrial	UL16
4338	MOCS2	Molybdopterin synthase catalytic subunit	US18
23049	SMG1	Serine/threonine-protein kinase SMG1	UL16, US7
10783	NEK6	Serine/threonine-protein kinase Nek6	UL94
4067	LYN	Tyrosine-protein kinase Lyn	UL20
4140	MARK3	MAP/microtubule affinity-regulating kinase 3	UL82
22978	NT5C2	Cytosolic purine 5'-nucleotidase	ORFL147C
64802	NMNAT1	Nicotinamide/nicotinic acid mononucleotide adenylyltransferase 1	UL131A
140609	NEK7	Serine/threonine-protein kinase Nek7	UL94
1108	CHD4	Chromodomain-helicase-DNA-binding protein 4	UL29, UL38
11153	FICD	Adenosine monophosphate-protein transferase FICD	US15
83871	RAB34	Ras-related protein Rab-34, isoform NARR	UL42
1106	CHD2	Chromodomain-helicase-DNA-binding protein 2	US22
4599	MX1	Interferon-induced GTP-binding protein Mx1	UL56
1107	CHD3	Chromodomain-helicase-DNA-binding protein 3	UL29, UL38
9246	UBE2L6	Ubiquitin/ISG15-conjugating enzyme E2 L6	UL102, UL132, UL14, UL56
10694	CCT8	T-complex protein 1 subunit theta	UL16
9451	EIF2AK3	Eukaryotic translation initiation factor 2-alpha kinase 3	US30
27338	UBE2S	Ubiquitin-conjugating enzyme E2 S	RL6, US12
57038	RARS2	Probable arginine--tRNA ligase, mitochondrial	UL20
79009	DDX50	ATP-dependent RNA helicase DDX50	UL9
8526	DGKE	Diacylglycerol kinase epsilon	US14
89941	RHOT2	Mitochondrial Rho GTPase 2	UL74
4921	DDR2	Discoidin domain-containing receptor 2	US27, UL148A, US14, UL20, UL8
5159	PDGFRB	Platelet-derived growth factor receptor beta	UL20
64121	RRAGC	Ras-related GTP-binding protein C	UL14
9448	MAP4K4	Mitogen-activated protein kinase kinase kinase kinase 4	ORFS343C
56997	COQ8A	Atypical kinase COQ8A, mitochondrial	UL139
9917	FAM20B	Glycosaminoglycan xylosylkinase	US14
55191	NADSYN1	Glutamine-dependent NAD(+) synthetase	UL75
54622	ARL15	ADP-ribosylation factor-like protein 15	US27
8934	RAB29	Ras-related protein Rab-7L1	UL40, US27
64225	ATL2	Atlastin-2	UL148C
83858	ATAD3B	ATPase family AAA domain-containing protein 3B	US22
4597	MVD	Diphosphomevalonate decarboxylase	UL121
11000	SLC27A3	Long-chain fatty acid transport protein 3	UL148C, US21
26354	GNL3	Guanine nucleotide-binding protein-like 3	UL44, UL19, UL132, UL9
9367	RAB9A	Ras-related protein Rab-9A	UL44
22853	LMTK2	Serine/threonine-protein kinase LMTK2	US27
5414	SEPT4	Septin-4	UL135
3313	HSPA9	Stress-70 protein, mitochondrial	UL80.5
2767	GNA11	Guanine nucleotide-binding protein subunit alpha-11	UL20
26289	AK5	Adenylate kinase isoenzyme 5	US28
7415	VCP	Transitional endoplasmic reticulum ATPase	US30
10672	GNA13	Guanine nucleotide-binding protein subunit alpha-13	US27, UL8, US28, UL14, UL13
2074	ERCC6	DNA excision repair protein ERCC-6	UL80.5, UL38, RL8A, UL9, ORFL147C
1915	EEF1A1	Elongation factor 1-alpha 1	UL19
6950	TCP1	T-complex protein 1 subunit alpha	UL70
9221	NOLC1	Nucleolar and coiled-body phosphoprotein 1	UL86, US7
23195	MDN1	Midasin	UL75
2068	ERCC2	TFIIH basal transcription factor complex helicase XPD subunit	US9, UL20
27314	RAB30	Ras-related protein Rab-30	US27
6683	SPAST	Spastin	US14
3416	IDE	Insulin-degrading enzyme	UL15A
23095	KIF1B	Kinesin-like protein KIF1B	US12, US14, UL43
23586	DDX58	Probable ATP-dependent RNA helicase DDX58	UL47, UL56, US9, US27
55300	PI4K2B	Phosphatidylinositol 4-kinase type 2-beta	US27, UL100
116988	AGAP3	Arf-GAP with GTPase, ANK repeat and PH domain-containing protein 3	UL69, UL83
2081	ERN1	Serine/threonine-protein kinase/endoribonuclease IRE1	US12
699	BUB1	Mitotic checkpoint serine/threonine-protein kinase BUB1	UL20
2633	GBP1	Guanylate-binding protein 1	UL14, ORFS343C, UL27
5156	PDGFRA	Platelet-derived growth factor receptor alpha	UL75, UL74, UL20, UL115, UL141, UL140, US7, UL123, UL132
7525	YES1	Tyrosine-protein kinase Yes	UL20
5566	PRKACA	cAMP-dependent protein kinase catalytic subunit alpha	UL14
2778	GNAS	Neuroendocrine secretory protein 55	UL94
3329	HSPD1	60 kDa heat shock protein, mitochondrial	UL70
2794	GNL1	Guanine nucleotide-binding protein-like 1	UL38
2180	ACSL1	Long-chain-fatty-acid--CoA ligase 1	US23, UL14, UL135
493	ATP2B4	Plasma membrane calcium-transporting ATPase 4	UL8
57680	CHD8	Chromodomain-helicase-DNA-binding protein 8	US12
27304	MOCS3	Adenylyltransferase and sulfurtransferase MOCS3	UL4
10938	EHD1	EH domain-containing protein 1	ORFL147C
2185	PTK2B	Protein-tyrosine kinase 2-beta	UL24
9031	BAZ1B	Tyrosine-protein kinase BAZ1B	UL9, RL6, UL30, UL21A, US33A, UL132
9416	DDX23	Probable ATP-dependent RNA helicase DDX23	UL8
2182	ACSL4	Long-chain-fatty-acid--CoA ligase 4	UL86
2050	EPHB4	Ephrin type-B receptor 4	US14
5894	RAF1	RAF proto-oncogene serine/threonine-protein kinase	UL132
55288	RHOT1	Mitochondrial Rho GTPase 1	UL74, UL40, UL47
55083	KIF26B	Kinesin-like protein KIF26B	UL116, UL123, UL150, UL75, US7
381	ARF5	ADP-ribosylation factor 5	UL40
57130	ATP13A1	Manganese-transporting ATPase 13A1	US21, US13, UL148C
285282	RABL3	Rab-like protein 3	UL75
22929	SEPHS1	Selenide, water dikinase 1	US12
25865	PRKD2	Serine/threonine-protein kinase D2	UL105, US9, UL47
50488	MINK1	Misshapen-like kinase 1	ORFS343C, UL150A, UL55, UL56
51727	CMPK1	UMP-CMP kinase	RL6, UL56, US8, UL132, UL47, US12
23405	DICER1	Endoribonuclease Dicer	UL44
3192	HNRNPU	Heterogeneous nuclear ribonucleoprotein U	US22
5585	PKN1	Serine/threonine-protein kinase N1	ORFL147C
1770	DNAH9	Dynein heavy chain 9, axonemal	UL50
3305	HSPA1L	Heat shock 70 kDa protein 1-like	UL70
2064	ERBB2	Receptor tyrosine-protein kinase erbB-2	US13, US12, US21, US20
2710	GK	Glycerol kinase	UL147A, UL16, UL40
3303	HSPA1B	Heat shock 70 kDa protein 1B	UL70
22948	CCT5	T-complex protein 1 subunit epsilon	UL70
283106	CSNK2A3	Casein kinase II subunit alpha 3	UL84
3310	HSPA6	Heat shock 70 kDa protein 6	UL70
9785	DHX38	Pre-mRNA-splicing factor ATP-dependent RNA helicase PRP16	UL2, US26, UL133
8780	RIOK3	Serine/threonine-protein kinase RIO3	UL40
5870	RAB6A	Ras-related protein Rab-6A	UL13, UL148A, UL40, US27, UL100, US28
1956	EGFR	Epidermal growth factor receptor	US12, US13, UL8
2932	GSK3B	Glycogen synthase kinase-3 beta	US22, UL80.5, RL6
2931	GSK3A	Glycogen synthase kinase-3 alpha	UL80.5, US22
57111	RAB25	Ras-related protein Rab-25	UL56
1025	CDK9	Cyclin-dependent kinase 9	UL40, UL94
1024	CDK8	Cyclin-dependent kinase 8	UL50
6237	RRAS	Ras-related protein R-Ras	UL8, UL14
79934	COQ8B	Atypical kinase COQ8B, mitochondrial	US9
5289	PIK3C3	Phosphatidylinositol 3-kinase catalytic subunit type 3	UL16, UL132, UL77
51347	TAOK3	Serine/threonine-protein kinase TAO3	US16
5867	RAB4A	Ras-related protein Rab-4A	US27
4907	NT5E	5'-nucleotidase	ORFS343C, RL9A, UL131A, UL128, UL148A, RL6, UL20, UL132
5865	RAB3B	Ras-related protein Rab-3B	US27
3654	IRAK1	Interleukin-1 receptor-associated kinase 1	UL20, US9, UL19
5286	PIK3C2A	Phosphatidylinositol 4-phosphate 3-kinase C2 domain-containing subunit alpha	UL32
6041	RNASEL	2-5A-dependent ribonuclease	UL74
659	BMPR2	Bone morphogenetic protein receptor type-2	US27
1158	CKM	Creatine kinase M-type	UL1, US28
57644	MYH7B	Myosin-7B	US28
57505	AARS2	Alanine--tRNA ligase, mitochondrial	UL16, UL14
1159	CKMT1A	Creatine kinase U-type, mitochondrial	UL56, US23, UL56
5096	PCCB	Propionyl-CoA carboxylase beta chain, mitochondrial	UL50
9525	VPS4B	Vacuolar protein sorting-associated protein 4B	US16, US14
1969	EPHA2	Ephrin type-A receptor 2	UL20
2043	EPHA4	Ephrin type-A receptor 4	UL78
7155	TOP2B	DNA topoisomerase 2-beta	UL9
7153	TOP2A	DNA topoisomerase 2-alpha	UL9, RL8A, UL20, UL30, UL86, RL6, UL150A, UL105, UL19, UL32
5095	PCCA	Propionyl-CoA carboxylase alpha chain, mitochondrial	UL50, RL9A, UL102
5198	PFAS	Phosphoribosylformylglycinamidine synthase	RL6
5091	PC	Pyruvate carboxylase, mitochondrial	UL27
27348	TOR1B	Torsin-1B	UL40, US3
3068	HDGF	Hepatoma-derived growth factor	UL45
5297	PI4KA	Phosphatidylinositol 4-kinase alpha	UL16, UL132, UL20
112714	TUBA3E	Tubulin alpha-3E chain	UL138
Transcription-coupled nucleotide-excision repair p=0.00000000849
5436	POLR2G	DNA-directed RNA polymerase II subunit RPB7	UL87
5437	POLR2H	DNA-directed RNA polymerases I, II, and III subunit RPABC3	UL87, UL87, UL91
5434	POLR2E	DNA-directed RNA polymerases I, II, and III subunit RPABC1	UL87
5435	POLR2F	DNA-directed RNA polymerases I, II, and III subunit RPABC2	UL87, UL91, UL95
8533	COPS3	COP9 signalosome complex subunit 3	US12, US14
5438	POLR2I	DNA-directed RNA polymerase II subunit RPB9	UL87
2033	EP300	Histone acetyltransferase p300	UL31, UL26
2072	ERCC4	DNA repair endonuclease XPF	US26
2074	ERCC6	DNA excision repair protein ERCC-6	UL80.5, UL38, RL8A, UL9, ORFL147C
2068	ERCC2	TFIIH basal transcription factor complex helicase XPD subunit	US9, UL20
2873	GPS1	COP9 signalosome complex subunit 1	UL33
9716	AQR	Intron-binding protein aquarius	UL30
5440	POLR2K	DNA-directed RNA polymerases I, II, and III subunit RPABC4	UL87, UL91
6117	RPA1	Replication protein A 70 kDa DNA-binding subunit	UL105
6118	RPA2	Replication protein A 32 kDa subunit	US12, US14, UL105
64708	COPS7B	COP9 signalosome complex subunit 7b	UL22A
7874	USP7	Ubiquitin carboxyl-terminal hydrolase 7	UL83
1642	DDB1	DNA damage-binding protein 1	UL27, UL19, UL145
5441	POLR2L	DNA-directed RNA polymerases I, II, and III subunit RPABC5	UL87
5424	POLD1	DNA polymerase delta catalytic subunit	ORFL147C, UL132
91603	ZNF830	Zinc finger protein 830	UL80.5, US19, UL8
3980	LIG3	DNA ligase 3	RL8A, UL132, UL55, UL86
10987	COPS5	COP9 signalosome complex subunit 5	UL19
2965	GTF2H1	General transcription factor IIH subunit 1	US7
6917	TCEA1	Transcription elongation factor A protein 1	RL6
8451	CUL4A	Cullin-4A	UL19, RL1, US7, RL12, UL122, UL135, US34A
5431	POLR2B	DNA-directed RNA polymerase II subunit RPB2	UL87
8450	CUL4B	Cullin-4B	UL19, UL19, RL1
5430	POLR2A	DNA-directed RNA polymerase II subunit RPB1	UL87
5433	POLR2D	DNA-directed RNA polymerase II subunit RPB4	UL87
5432	POLR2C	DNA-directed RNA polymerase II subunit RPB3	UL87, US15
10450	PPIE	Peptidyl-prolyl cis-trans isomerase E	UL148D
Ubl conjugation pathway p=0.0000000274
10346	TRIM22	E3 ubiquitin-protein ligase TRIM22	UL71
81631	MAP1LC3B	Microtubule-associated proteins 1A/1B light chain 3B	UL140, UL148A
8883	NAE1	NEDD8-activating enzyme E1 regulatory subunit	UL27, ORFS343C
90293	KLHL13	Kelch-like protein 13	IRS1
55236	UBA6	Ubiquitin-like modifier-activating enzyme 6	RL6, UL30
57674	RNF213	E3 ubiquitin-protein ligase RNF213	UL132
9246	UBE2L6	Ubiquitin/ISG15-conjugating enzyme E2 L6	UL102, UL132, UL14, UL56
55432	YOD1	Ubiquitin thioesterase OTU1	UL56
331	XIAP	E3 ubiquitin-protein ligase XIAP	UL145, UL147, UL13, UL38, UL54
55743	CHFR	E3 ubiquitin-protein ligase CHFR	UL54, UL114
8925	HERC1	Probable E3 ubiquitin-protein ligase HERC1	US34A
63891	RNF123	E3 ubiquitin-protein ligase RNF123	US33A
10616	RBCK1	RanBP-type and C3HC4-type zinc finger-containing protein 1	US14
27338	UBE2S	Ubiquitin-conjugating enzyme E2 S	RL6, US12
7353	UFD1L	Ubiquitin fusion degradation protein 1 homolog	US30
29128	UHRF1	E3 ubiquitin-protein ligase UHRF1	RL6
23077	MYCBP2	E3 ubiquitin-protein ligase MYCBP2	UL80.5
23304	UBR2	E3 ubiquitin-protein ligase UBR2	US8, UL150, US34, UL19, UL80.5
23072	HECW1	E3 ubiquitin-protein ligase HECW1	UL42
50717	DCAF8	DDB1- and CUL4-associated factor 8	UL74
9253	NUMBL	Numb-like protein	UL139, UL140, UL132
79718	TBL1XR1	F-box-like/WD repeat-containing protein TBL1XR1	UL29
79699	ZYG11B	Protein zyg-11 homolog B	IRS1, UL148A
10533	ATG7	Ubiquitin-like modifier-activating enzyme ATG7	ORFL147C, UL147, UL27
54726	OTUD4	OTU domain-containing protein 4	US22, US9
51569	UFM1	Ubiquitin-fold modifier 1	RL6
54620	FBXL19	F-box/LRR-repeat protein 19	UL94
55958	KLHL9	Kelch-like protein 9	IRS1
284996	RNF149	E3 ubiquitin-protein ligase RNF149	UL140, UL20, US12
51366	UBR5	E3 ubiquitin-protein ligase UBR5	UL27, UL36, US26, UL74, US34, UL47
7337	UBE3A	Ubiquitin-protein ligase E3A	UL40
7347	UCHL3	Ubiquitin carboxyl-terminal hydrolase isozyme L3	UL56
9867	PJA2	E3 ubiquitin-protein ligase Praja-2	UL74
7345	UCHL1	Ubiquitin carboxyl-terminal hydrolase isozyme L1	RL6
6015	RING1	E3 ubiquitin-protein ligase RING1	US22
23066	CAND2	Cullin-associated NEDD8-dissociated protein 2	UL74
5930	RBBP6	E3 ubiquitin-protein ligase RBBP6	UL8
25831	HECTD1	E3 ubiquitin-protein ligase HECTD1	US12
79016	DDA1	DET1- and DDB1-associated protein 1	UL19, UL145, RL1
10422	UBAC1	Ubiquitin-associated domain-containing protein 1	US33A
26145	IRF2BP1	Interferon regulatory factor 2-binding protein 1	UL148C
10273	STUB1	E3 ubiquitin-protein ligase CHIP	UL70
7327	UBE2G2	Ubiquitin-conjugating enzyme E2 G2	US14
7415	VCP	Transitional endoplasmic reticulum ATPase	US30
8945	BTRC	F-box/WD repeat-containing protein 1A	US24, UL30A, US23
7328	UBE2H	Ubiquitin-conjugating enzyme E2 H	RL6
7187	TRAF3	TNF receptor-associated factor 3	ORFL147C
23291	FBXW11	F-box/WD repeat-containing protein 11	US24, UL30A, US22, US24
7332	UBE2L3	Ubiquitin-conjugating enzyme E2 L3	RL6, UL47, US8, UL56, US7
29086	BABAM1	BRISC and BRCA1-A complex member 1	US26, UL70, UL150
7334	UBE2N	Ubiquitin-conjugating enzyme E2 N	RL6, UL56
23295	MGRN1	E3 ubiquitin-protein ligase MGRN1	UL78
1643	DDB2	DNA damage-binding protein 2	UL132, UL150A, UL55, ORFL147C, UL86, UL47, US9, RL8A
23327	NEDD4L	E3 ubiquitin-protein ligase NEDD4-like	UL55, UL42, US30, UL20, UL133
55666	NPLOC4	Nuclear protein localization protein 4 homolog	US30
11342	RNF13	E3 ubiquitin-protein ligase RNF13	UL20
23113	CUL9	Cullin-9	US30
1642	DDB1	DNA damage-binding protein 1	UL27, UL19, UL145
26270	FBXO6	F-box only protein 6	UL74, UL20, UL55
26273	FBXO3	F-box only protein 3	UL36
80204	FBXO11	F-box only protein 11	UL80.5, UL80, UL104
10075	HUWE1	E3 ubiquitin-protein ligase HUWE1	US32, US32
91445	RNF185	E3 ubiquitin-protein ligase RNF185	UL148C
83737	ITCH	E3 ubiquitin-protein ligase Itchy homolog	UL42, UL55
79184	BRCC3	Lys-63-specific deubiquitinase BRCC36	US26
55905	RNF114	E3 ubiquitin-protein ligase RNF114	UL102
57534	MIB1	E3 ubiquitin-protein ligase MIB1	UL112
23172	FAM175B	BRISC complex subunit Abro1	US26
10193	RNF41	E3 ubiquitin-protein ligase NRDP1	US26
51530	ZC3HC1	Nuclear-interacting partner of ALK	UL71
7126	TNFAIP1	BTB/POZ domain-containing adapter for CUL3-mediated RhoA degradation protein 2	US1
9101	USP8	Ubiquitin carboxyl-terminal hydrolase 8	US7
5987	TRIM27	Zinc finger protein RFP	UL26
11059	WWP1	NEDD4-like E3 ubiquitin-protein ligase WWP1	UL55, US30
197131	UBR1	E3 ubiquitin-protein ligase UBR1	UL16, UL74
6921	TCEB1	Transcription elongation factor B polypeptide 1	UL94
9690	UBE3C	Ubiquitin-protein ligase E3C	UL16, UL18
10444	ZER1	Protein zer-1 homolog	UL21A
54850	FBXL12	F-box/LRR-repeat protein 12	UL83
56957	OTUD7B	OTU domain-containing protein 7B	US7
219333	USP12	Ubiquitin carboxyl-terminal hydrolase 12	UL138
79654	HECTD3	E3 ubiquitin-protein ligase HECTD3	UL74
57520	HECW2	E3 ubiquitin-protein ligase HECW2	UL42, US30, US26
8454	CUL1	Cullin-1	UL36
55294	FBXW7	F-box/WD repeat-containing protein 7	UL20, US22
57599	WDR48	WD repeat-containing protein 48	UL138
55611	OTUB1	Ubiquitin thioesterase OTUB1	UL56
8452	CUL3	Cullin-3	UL26
8451	CUL4A	Cullin-4A	UL19, RL1, US7, RL12, UL122, UL135, US34A
8450	CUL4B	Cullin-4B	UL19, UL19, RL1
23609	MKRN2	Probable E3 ubiquitin-protein ligase makorin-2	US19
23024	PDZRN3	E3 ubiquitin-protein ligase PDZRN3	UL47
84231	TRAF7	E3 ubiquitin-protein ligase TRAF7	UL80.5
64750	SMURF2	E3 ubiquitin-protein ligase SMURF2	UL26
28952	CCDC22	Coiled-coil domain-containing protein 22	UL47
79269	DCAF10	DDB1- and CUL4-associated factor 10	US18, US20
23358	USP24	Ubiquitin carboxyl-terminal hydrolase 24	UL29, UL38, UL135, UL9, US7, UL55, UL86
387522	UBE2V1	Ubiquitin-conjugating enzyme E2 variant 1	RL6, UL132, UL56, US8, US7, UL45
4734	NEDD4	E3 ubiquitin-protein ligase NEDD4	UL55, UL42, UL55, UL42, UL148A, US30
11101	ATE1	Arginyl-tRNA--protein transferase 1	UL74
8816	DCAF5	DDB1- and CUL4-associated factor 5	UL80.5
51343	FZR1	Fizzy-related protein homolog	UL83, US19
6907	TBL1X	F-box-like/WD repeat-containing protein TBL1X	UL29, US26, UL94, UL150A, UL30
9320	TRIP12	E3 ubiquitin-protein ligase TRIP12	US7
7375	USP4	Ubiquitin carboxyl-terminal hydrolase 4	RL6
7874	USP7	Ubiquitin carboxyl-terminal hydrolase 7	UL83
26232	FBXO2	F-box only protein 2	UL8, UL74, UL4, UL55, UL144, UL7
79734	KCTD17	BTB/POZ domain-containing protein KCTD17	UL86
11060	WWP2	NEDD4-like E3 ubiquitin-protein ligase WWP2	UL55, UL80.5, US30
26091	HERC4	Probable E3 ubiquitin-protein ligase HERC4	US14
55819	RNF130	E3 ubiquitin-protein ligase RNF130	UL148A
9730	VPRBP	Protein VPRBP	UL35, US30
79876	UBA5	Ubiquitin-like modifier-activating enzyme 5	ORFL147C
51070	NOSIP	Nitric oxide synthase-interacting protein	UL83
54778	RNF111	E3 ubiquitin-protein ligase Arkadia	UL94
57448	BIRC6	Baculoviral IAP repeat-containing protein 6	UL94
mRNA splicing, via spliceosome p=0.000000769
5436	POLR2G	DNA-directed RNA polymerase II subunit RPB7	UL87
7536	SF1	Splicing factor 1	US26
5437	POLR2H	DNA-directed RNA polymerases I, II, and III subunit RPABC3	UL87, UL87, UL91
1477	CSTF1	Cleavage stimulation factor subunit 1	UL80.5
5434	POLR2E	DNA-directed RNA polymerases I, II, and III subunit RPABC1	UL87
5435	POLR2F	DNA-directed RNA polymerases I, II, and III subunit RPABC2	UL87, UL91, UL95
8220	DGCR14	Protein DGCR14	RL6, UL47
5438	POLR2I	DNA-directed RNA polymerase II subunit RPB9	UL87
23517	SKIV2L2	Superkiller viralicidic activity 2-like 2	US26
26121	PRPF31	U4/U6 small nuclear ribonucleoprotein Prp31	RL6
60625	DHX35	Probable ATP-dependent RNA helicase DHX35	UL22A
22938	SNW1	SNW domain-containing protein 1	US26
125950	RAVER1	Ribonucleoprotein PTB-binding 1	UL72, ORFL147C, UL9, US7
5440	POLR2K	DNA-directed RNA polymerases I, II, and III subunit RPABC4	UL87, UL91
3192	HNRNPU	Heterogeneous nuclear ribonucleoprotein U	US22
29894	CPSF1	Cleavage and polyadenylation specificity factor subunit 1	UL8, UL26
5441	POLR2L	DNA-directed RNA polymerases I, II, and III subunit RPABC5	UL87
53981	CPSF2	Cleavage and polyadenylation specificity factor subunit 2	UL26
5411	PNN	Pinin	UL9, RL6
64783	RBM15	Putative RNA-binding protein 15	US22
10236	HNRNPR	Heterogeneous nuclear ribonucleoprotein R	UL8
4686	NCBP1	Nuclear cap-binding protein subunit 1	UL130
55599	RNPC3	RNA-binding protein 40	UL72
55094	GPATCH1	G patch domain-containing protein 1	UL22A
8683	SRSF9	Serine/arginine-rich splicing factor 9	UL44
55596	ZCCHC8	Zinc finger CCHC domain-containing protein 8	US26
9785	DHX38	Pre-mRNA-splicing factor ATP-dependent RNA helicase PRP16	UL2, US26, UL133
53938	PPIL3	Peptidyl-prolyl cis-trans isomerase-like 3	US26
65109	UPF3B	Regulator of nonsense transcripts 3B	US9
51593	SRRT	Serrate RNA effector molecule homolog	UL98
22794	CASC3	Protein CASC3	US26
51692	CPSF3	Cleavage and polyadenylation specificity factor subunit 3	UL26
51691	LSM8	U6 snRNA-associated Sm-like protein LSm8	ORFL147C
27316	RBMX	RNA-binding motif protein, X chromosome	US22
9129	PRPF3	U4/U6 small nuclear ribonucleoprotein Prp3	US7
9716	AQR	Intron-binding protein aquarius	UL30
27258	LSM3	U6 snRNA-associated Sm-like protein LSm3	RL6
10569	SLU7	Pre-mRNA-splicing factor SLU7	US26
10772	SRSF10	Serine/arginine-rich splicing factor 10	RL6
23524	SRRM2	Serine/arginine repetitive matrix protein 2	UL94
9939	RBM8A	RNA-binding protein 8A	RL6, UL132
6629	SNRPB2	U2 small nuclear ribonucleoprotein B''	UL9, US9
51585	PCF11	Pre-mRNA cleavage complex 2 protein Pcf11	US22
22826	DNAJC8	DnaJ homolog subfamily C member 8	UL99
6430	SRSF5	Serine/arginine-rich splicing factor 5	RL6, UL44
10212	DDX39A	ATP-dependent RNA helicase DDX39A	UL27, UL122, UL14
51645	PPIL1	Peptidyl-prolyl cis-trans isomerase-like 1	UL8, US26
5725	PTBP1	Polypyrimidine tract-binding protein 1	ORFL147C
22913	RALY	RNA-binding protein Raly	UL10, UL56
2962	GTF2F1	General transcription factor IIF subunit 1	ORFL147C
6429	SRSF4	Serine/arginine-rich splicing factor 4	UL44
5431	POLR2B	DNA-directed RNA polymerase II subunit RPB2	UL87
5430	POLR2A	DNA-directed RNA polymerase II subunit RPB1	UL87
5433	POLR2D	DNA-directed RNA polymerase II subunit RPB4	UL87
5432	POLR2C	DNA-directed RNA polymerase II subunit RPB3	UL87, US15
10450	PPIE	Peptidyl-prolyl cis-trans isomerase E	UL148D
9416	DDX23	Probable ATP-dependent RNA helicase DDX23	UL8
domain:HECT p=0.000000966
26091	HERC4	Probable E3 ubiquitin-protein ligase HERC4	US14
11060	WWP2	NEDD4-like E3 ubiquitin-protein ligase WWP2	UL55, UL80.5, US30
64750	SMURF2	E3 ubiquitin-protein ligase SMURF2	UL26
79654	HECTD3	E3 ubiquitin-protein ligase HECTD3	UL74
4734	NEDD4	E3 ubiquitin-protein ligase NEDD4	UL55, UL42, UL55, UL42, UL148A, US30
8925	HERC1	Probable E3 ubiquitin-protein ligase HERC1	US34A
51366	UBR5	E3 ubiquitin-protein ligase UBR5	UL27, UL36, US26, UL74, US34, UL47
7337	UBE3A	Ubiquitin-protein ligase E3A	UL40
57520	HECW2	E3 ubiquitin-protein ligase HECW2	UL42, US30, US26
10075	HUWE1	E3 ubiquitin-protein ligase HUWE1	US32, US32
11059	WWP1	NEDD4-like E3 ubiquitin-protein ligase WWP1	UL55, US30
23327	NEDD4L	E3 ubiquitin-protein ligase NEDD4-like	UL55, UL42, US30, UL20, UL133
9320	TRIP12	E3 ubiquitin-protein ligase TRIP12	US7
83737	ITCH	E3 ubiquitin-protein ligase Itchy homolog	UL42, UL55
9690	UBE3C	Ubiquitin-protein ligase E3C	UL16, UL18
23072	HECW1	E3 ubiquitin-protein ligase HECW1	UL42
25831	HECTD1	E3 ubiquitin-protein ligase HECTD1	US12
CCR4-NOT complex p=0.00000275
9125	RQCD1	Cell differentiation protein RCD1 homolog	UL72
57472	CNOT6	CCR4-NOT transcription complex subunit 6	UL72
85456	TNKS1BP1	182 kDa tankyrase-1-binding protein	UL72
7538	ZFP36	mRNA decay activator protein ZFP36	UL56
23019	CNOT1	CCR4-NOT transcription complex subunit 1	UL72, UL72
25904	CNOT10	CCR4-NOT transcription complex subunit 10	UL72
55571	CNOT11	CCR4-NOT transcription complex subunit 11	UL72
246175	CNOT6L	CCR4-NOT transcription complex subunit 6-like	UL72
4849	CNOT3	CCR4-NOT transcription complex subunit 3	UL72
29883	CNOT7	CCR4-NOT transcription complex subunit 7	UL72
4848	CNOT2	CCR4-NOT transcription complex subunit 2	UL72
9337	CNOT8	CCR4-NOT transcription complex subunit 8	UL72
RNA-binding p=0.0000124
5436	POLR2G	DNA-directed RNA polymerase II subunit RPB7	UL87
7536	SF1	Splicing factor 1	US26
51574	LARP7	La-related protein 7	UL44
7538	ZFP36	mRNA decay activator protein ZFP36	UL56
51373	MRPS17	28S ribosomal protein S17, mitochondrial	UL44
27067	STAU2	Double-stranded RNA-binding protein Staufen homolog 2	UL44
6165	RPL35A	60S ribosomal protein L35a	UL6, US34A, UL44
125950	RAVER1	Ribonucleoprotein PTB-binding 1	UL72, ORFL147C, UL9, US7
81627	TRMT1L	TRMT1-like protein	UL83, UL30
79009	DDX50	ATP-dependent RNA helicase DDX50	UL9
9444	QKI	Protein quaking	US7, UL99
6780	STAU1	Double-stranded RNA-binding protein Staufen homolog 1	UL44
79811	SLTM	SAFB-like transcription modulator	US22, US26, RL6, UL30, US33A
6294	SAFB	Scaffold attachment factor B1	US22
8731	RNMT	mRNA cap guanine-N7 methyltransferase	UL99, UL27
5036	PA2G4	Proliferation-associated protein 2G4	UL56
8683	SRSF9	Serine/arginine-rich splicing factor 9	UL44
22985	ACIN1	Apoptotic chromatin condensation inducer in the nucleus	US19
7884	SLBP	Histone RNA hairpin-binding protein	US26
5937	RBMS1	RNA-binding motif, single-stranded-interacting protein 1	UL37
129831	RBM45	RNA-binding protein 45	UL26, UL26, ORFL147C
389677	RBM12B	RNA-binding protein 12B	US22
55651	NHP2	H/ACA ribonucleoprotein complex subunit 2	UL44
8867	SYNJ1	Synaptojanin-1	US34A, RL6
4839	NOP2	Probable 28S rRNA (cytosine(4447)-C(5))-methyltransferase	UL44
55037	PTCD3	Pentatricopeptide repeat domain-containing protein 3, mitochondrial	UL44
440275	EIF2AK4	eIF-2-alpha kinase GCN2	UL150A
65083	NOL6	Nucleolar protein 6	UL9
9984	THOC1	THO complex subunit 1	UL86
22794	CASC3	Protein CASC3	US26
51692	CPSF3	Cleavage and polyadenylation specificity factor subunit 3	UL26
51691	LSM8	U6 snRNA-associated Sm-like protein LSm8	ORFL147C
84324	SARNP	SAP domain-containing ribonucleoprotein	UL45
27316	RBMX	RNA-binding motif protein, X chromosome	US22
27288	RBMXL2	RNA-binding motif protein, X-linked-like-2	US22
23589	CARHSP1	Calcium-regulated heat-stable protein 1	UL56, RL6, UL132
58517	RBM25	RNA-binding protein 25	US14
103	ADAR	Double-stranded RNA-specific adenosine deaminase	UL9
1267	CNP	2',3'-cyclic-nucleotide 3'-phosphodiesterase	ORFL147C
10179	RBM7	RNA-binding protein 7	US26, US22, ORFL147C
23586	DDX58	Probable ATP-dependent RNA helicase DDX58	UL47, UL56, US9, US27
23524	SRRM2	Serine/arginine repetitive matrix protein 2	UL94
10180	RBM6	RNA-binding protein 6	US26, US22
26135	SERBP1	Plasminogen activator inhibitor 1 RNA-binding protein	UL2, US9
10212	DDX39A	ATP-dependent RNA helicase DDX39A	UL27, UL122, UL14
22907	DHX30	Putative ATP-dependent RNA helicase DHX30	UL44
22913	RALY	RNA-binding protein Raly	UL10, UL56
54487	DGCR8	Microprocessor complex subunit DGCR8	US22
8638	OASL	2'-5'-oligoadenylate synthase-like protein	UL56, UL44, UL9, UL71
24138	IFIT5	Interferon-induced protein with tetratricopeptide repeats 5	UL71, UL27, UL122, UL14
8575	PRKRA	Interferon-inducible double-stranded RNA-dependent protein kinase activator A	UL44
84305	PYM1	Partner of Y14 and mago	ORFL147C, RL6, US9
26121	PRPF31	U4/U6 small nuclear ribonucleoprotein Prp31	RL6
494115	RBMXL1	RNA binding motif protein, X-linked-like-1	US22
55601	DDX60	Probable ATP-dependent RNA helicase DDX60	UL56, UL71
23405	DICER1	Endoribonuclease Dicer	UL44
3192	HNRNPU	Heterogeneous nuclear ribonucleoprotein U	US22
29890	RBM15B	Putative RNA-binding protein 15B	US22
10658	CELF1	CUGBP Elav-like family member 1	ORFL147C
4154	MBNL1	Muscleblind-like protein 1	ORFL147C, ORFS343C, ORFL147C, ORFS343C, UL47
29894	CPSF1	Cleavage and polyadenylation specificity factor subunit 1	UL8, UL26
53981	CPSF2	Cleavage and polyadenylation specificity factor subunit 2	UL26
100526737	RBM14	RNA-binding protein 14	US22
55695	NSUN5	Probable 28S rRNA (cytosine-C(5))-methyltransferase	US22
55794	DDX28	Probable ATP-dependent RNA helicase DDX28	UL36
51663	ZFR	Zinc finger RNA-binding protein	UL9, UL150A
2908	NR3C1	Glucocorticoid receptor	UL16
64783	RBM15	Putative RNA-binding protein 15	US22
10236	HNRNPR	Heterogeneous nuclear ribonucleoprotein R	UL8
55599	RNPC3	RNA-binding protein 40	UL72
64062	RBM26	RNA-binding protein 26	UL2
29074	MRPL18	39S ribosomal protein L18, mitochondrial	UL44
29883	CNOT7	CCR4-NOT transcription complex subunit 7	UL72
65109	UPF3B	Regulator of nonsense transcripts 3B	US9
3609	ILF3	Interleukin enhancer-binding factor 3	UL21A, UL150A, UL112, US33A
54439	RBM27	RNA-binding protein 27	US26, UL30
27257	LSM1	U6 snRNA-associated Sm-like protein LSm1	US14, US16
118460	EXOSC6	Exosome complex component MTR3	US13
27250	PDCD4	Programmed cell death protein 4	UL47, UL132
55621	TRMT1	tRNA (guanine(26)-N(2))-dimethyltransferase	UL47
5511	PPP1R8	Nuclear inhibitor of protein phosphatase 1	ORFS343C, RL6, UL50
27258	LSM3	U6 snRNA-associated Sm-like protein LSm3	RL6
9716	AQR	Intron-binding protein aquarius	UL30
22894	DIS3	Exosome complex exonuclease RRP44	US12
6041	RNASEL	2-5A-dependent ribonuclease	UL74
10772	SRSF10	Serine/arginine-rich splicing factor 10	RL6
9939	RBM8A	RNA-binding protein 8A	RL6, UL132
57505	AARS2	Alanine--tRNA ligase, mitochondrial	UL16, UL14
57472	CNOT6	CCR4-NOT transcription complex subunit 6	UL72
6629	SNRPB2	U2 small nuclear ribonucleoprotein B''	UL9, US9
4343	MOV10	Putative helicase MOV-10	UL6, UL19, UL44, UL9
79171	RBM42	RNA-binding protein 42	US7
22828	SCAF8	Protein SCAF8	UL77
6430	SRSF5	Serine/arginine-rich splicing factor 5	RL6, UL44
2926	GRSF1	G-rich sequence factor 1	UL44
1736	DKC1	H/ACA ribonucleoprotein complex subunit 4	UL8, UL44
5725	PTBP1	Polypyrimidine tract-binding protein 1	ORFL147C
5394	EXOSC10	Exosome component 10	UL9
9667	SAFB2	Scaffold attachment factor B2	US22
10642	IGF2BP1	Insulin-like growth factor 2 mRNA-binding protein 1	UL44
50804	MYEF2	Myelin expression factor 2	UL44
6429	SRSF4	Serine/arginine-rich splicing factor 4	UL44
10450	PPIE	Peptidyl-prolyl cis-trans isomerase E	UL148D
9337	CNOT8	CCR4-NOT transcription complex subunit 8	UL72
NuRD complex p=0.0000152
1457	CSNK2A1	Casein kinase II subunit alpha	UL84
9219	MTA2	Metastasis-associated protein MTA2	UL29
1108	CHD4	Chromodomain-helicase-DNA-binding protein 4	UL29, UL38
5928	RBBP4	Histone-binding protein RBBP4	US14, US12
26038	CHD5	Chromodomain-helicase-DNA-binding protein 5	UL29
3065	HDAC1	Histone deacetylase 1	UL29
1107	CHD3	Chromodomain-helicase-DNA-binding protein 3	UL29, UL38
57459	GATAD2B	Transcriptional repressor p66-beta	UL8, US18, UL29
53615	MBD3	Methyl-CpG-binding domain protein 3	UL29, UL38
57504	MTA3	Metastasis-associated protein MTA3	UL29, UL38
54815	GATAD2A	Transcriptional repressor p66-alpha	UL29, UL38, RL6, UL20, UL9, UL86, US34A
5931	RBBP7	Histone-binding protein RBBP7	UL38, UL29
Ubiquitin-protein transferase activity p=0.000247
90293	KLHL13	Kelch-like protein 13	IRS1
55905	RNF114	E3 ubiquitin-protein ligase RNF114	UL102
57534	MIB1	E3 ubiquitin-protein ligase MIB1	UL112
57674	RNF213	E3 ubiquitin-protein ligase RNF213	UL132
9246	UBE2L6	Ubiquitin/ISG15-conjugating enzyme E2 L6	UL102, UL132, UL14, UL56
7126	TNFAIP1	BTB/POZ domain-containing adapter for CUL3-mediated RhoA degradation protein 2	US1
10193	RNF41	E3 ubiquitin-protein ligase NRDP1	US26
8925	HERC1	Probable E3 ubiquitin-protein ligase HERC1	US34A
55743	CHFR	E3 ubiquitin-protein ligase CHFR	UL54, UL114
331	XIAP	E3 ubiquitin-protein ligase XIAP	UL145, UL147, UL13, UL38, UL54
10616	RBCK1	RanBP-type and C3HC4-type zinc finger-containing protein 1	US14
10296	MAEA	Macrophage erythroblast attacher	UL26
27338	UBE2S	Ubiquitin-conjugating enzyme E2 S	RL6, US12
5987	TRIM27	Zinc finger protein RFP	UL26
84078	KBTBD7	Kelch repeat and BTB domain-containing protein 7	UL94
29128	UHRF1	E3 ubiquitin-protein ligase UHRF1	RL6
11059	WWP1	NEDD4-like E3 ubiquitin-protein ligase WWP1	UL55, US30
6921	TCEB1	Transcription elongation factor B polypeptide 1	UL94
23304	UBR2	E3 ubiquitin-protein ligase UBR2	US8, UL150, US34, UL19, UL80.5
9690	UBE3C	Ubiquitin-protein ligase E3C	UL16, UL18
23072	HECW1	E3 ubiquitin-protein ligase HECW1	UL42
10444	ZER1	Protein zer-1 homolog	UL21A
79654	HECTD3	E3 ubiquitin-protein ligase HECTD3	UL74
79699	ZYG11B	Protein zyg-11 homolog B	IRS1, UL148A
55958	KLHL9	Kelch-like protein 9	IRS1
51366	UBR5	E3 ubiquitin-protein ligase UBR5	UL27, UL36, US26, UL74, US34, UL47
57520	HECW2	E3 ubiquitin-protein ligase HECW2	UL42, US30, US26
7337	UBE3A	Ubiquitin-protein ligase E3A	UL40
9867	PJA2	E3 ubiquitin-protein ligase Praja-2	UL74
55294	FBXW7	F-box/WD repeat-containing protein 7	UL20, US22
8454	CUL1	Cullin-1	UL36
8452	CUL3	Cullin-3	UL26
5930	RBBP6	E3 ubiquitin-protein ligase RBBP6	UL8
23024	PDZRN3	E3 ubiquitin-protein ligase PDZRN3	UL47
25831	HECTD1	E3 ubiquitin-protein ligase HECTD1	US12
84231	TRAF7	E3 ubiquitin-protein ligase TRAF7	UL80.5
64750	SMURF2	E3 ubiquitin-protein ligase SMURF2	UL26
377007	KLHL30	Kelch-like protein 30	UL95, UL150, US31
10273	STUB1	E3 ubiquitin-protein ligase CHIP	UL70
7327	UBE2G2	Ubiquitin-conjugating enzyme E2 G2	US14
8945	BTRC	F-box/WD repeat-containing protein 1A	US24, UL30A, US23
4734	NEDD4	E3 ubiquitin-protein ligase NEDD4	UL55, UL42, UL55, UL42, UL148A, US30
7328	UBE2H	Ubiquitin-conjugating enzyme E2 H	RL6
7188	TRAF5	TNF receptor-associated factor 5	UL32
7187	TRAF3	TNF receptor-associated factor 3	ORFL147C
23291	FBXW11	F-box/WD repeat-containing protein 11	US24, UL30A, US22, US24
7332	UBE2L3	Ubiquitin-conjugating enzyme E2 L3	RL6, UL47, US8, UL56, US7
7334	UBE2N	Ubiquitin-conjugating enzyme E2 N	RL6, UL56
23295	MGRN1	E3 ubiquitin-protein ligase MGRN1	UL78
23327	NEDD4L	E3 ubiquitin-protein ligase NEDD4-like	UL55, UL42, US30, UL20, UL133
1643	DDB2	DNA damage-binding protein 2	UL132, UL150A, UL55, ORFL147C, UL86, UL47, US9, RL8A
9320	TRIP12	E3 ubiquitin-protein ligase TRIP12	US7
11342	RNF13	E3 ubiquitin-protein ligase RNF13	UL20
26232	FBXO2	F-box only protein 2	UL8, UL74, UL4, UL55, UL144, UL7
26091	HERC4	Probable E3 ubiquitin-protein ligase HERC4	US14
11060	WWP2	NEDD4-like E3 ubiquitin-protein ligase WWP2	UL55, UL80.5, US30
26270	FBXO6	F-box only protein 6	UL74, UL20, UL55
55819	RNF130	E3 ubiquitin-protein ligase RNF130	UL148A
80204	FBXO11	F-box only protein 11	UL80.5, UL80, UL104
26273	FBXO3	F-box only protein 3	UL36
10075	HUWE1	E3 ubiquitin-protein ligase HUWE1	US32, US32
51070	NOSIP	Nitric oxide synthase-interacting protein	UL83
4008	LMO7	LIM domain only protein 7	US26, US13
57448	BIRC6	Baculoviral IAP repeat-containing protein 6	UL94
83737	ITCH	E3 ubiquitin-protein ligase Itchy homolog	UL42, UL55
64795	RMND5A	Protein RMD5 homolog A	UL26
Prefoldin complex p=0.000323
5204	PFDN5	Prefoldin subunit 5	UL70, UL99, UL122, UL102, UL114, UL2
7411	VBP1	Prefoldin subunit 3	UL70
5203	PFDN4	Prefoldin subunit 4	UL70
5201	PFDN1	Prefoldin subunit 1	UL70
5202	PFDN2	Prefoldin subunit 2	UL70
10471	PFDN6	Prefoldin subunit 6	UL70, RL12, UL2, UL56, UL80.5, US16
81572	PDRG1	p53 and DNA damage-regulated protein 1	UL80.5
Ligase p=0.000357
10346	TRIM22	E3 ubiquitin-protein ligase TRIM22	UL71
55902	ACSS2	Acetyl-coenzyme A synthetase, cytoplasmic	RL6
10999	SLC27A4	Long-chain fatty acid transport protein 4	UL148C
55905	RNF114	E3 ubiquitin-protein ligase RNF114	UL102
55236	UBA6	Ubiquitin-like modifier-activating enzyme 6	RL6, UL30
57534	MIB1	E3 ubiquitin-protein ligase MIB1	UL112
57674	RNF213	E3 ubiquitin-protein ligase RNF213	UL132
10193	RNF41	E3 ubiquitin-protein ligase NRDP1	US26
55743	CHFR	E3 ubiquitin-protein ligase CHFR	UL54, UL114
331	XIAP	E3 ubiquitin-protein ligase XIAP	UL145, UL147, UL13, UL38, UL54
63891	RNF123	E3 ubiquitin-protein ligase RNF123	US33A
10616	RBCK1	RanBP-type and C3HC4-type zinc finger-containing protein 1	US14
93100	NAPRT	Nicotinate phosphoribosyltransferase	UL56, UL40
23464	GCAT	2-amino-3-ketobutyrate coenzyme A ligase, mitochondrial	UL20
5987	TRIM27	Zinc finger protein RFP	UL26
57038	RARS2	Probable arginine--tRNA ligase, mitochondrial	UL20
197131	UBR1	E3 ubiquitin-protein ligase UBR1	UL16, UL74
29128	UHRF1	E3 ubiquitin-protein ligase UHRF1	RL6
23077	MYCBP2	E3 ubiquitin-protein ligase MYCBP2	UL80.5
23304	UBR2	E3 ubiquitin-protein ligase UBR2	US8, UL150, US34, UL19, UL80.5
79654	HECTD3	E3 ubiquitin-protein ligase HECTD3	UL74
55191	NADSYN1	Glutamine-dependent NAD(+) synthetase	UL75
284996	RNF149	E3 ubiquitin-protein ligase RNF149	UL140, UL20, US12
7337	UBE3A	Ubiquitin-protein ligase E3A	UL40
445	ASS1	Argininosuccinate synthase	UL132, ORFL147C, UL150A, UL19, UL56, UL105, US9, UL55
9867	PJA2	E3 ubiquitin-protein ligase Praja-2	UL74
7345	UCHL1	Ubiquitin carboxyl-terminal hydrolase isozyme L1	RL6
8634	RTCA	RNA 3'-terminal phosphate cyclase	UL40, US12
11000	SLC27A3	Long-chain fatty acid transport protein 3	UL148C, US21
6015	RING1	E3 ubiquitin-protein ligase RING1	US22
23609	MKRN2	Probable E3 ubiquitin-protein ligase makorin-2	US19
5930	RBBP6	E3 ubiquitin-protein ligase RBBP6	UL8
23024	PDZRN3	E3 ubiquitin-protein ligase PDZRN3	UL47
56922	MCCC1	Methylcrotonoyl-CoA carboxylase subunit alpha, mitochondrial	UL103
84231	TRAF7	E3 ubiquitin-protein ligase TRAF7	UL80.5
26145	IRF2BP1	Interferon regulatory factor 2-binding protein 1	UL148C
65985	AACS	Acetoacetyl-CoA synthetase	RL6
10273	STUB1	E3 ubiquitin-protein ligase CHIP	UL70
8945	BTRC	F-box/WD repeat-containing protein 1A	US24, UL30A, US23
7187	TRAF3	TNF receptor-associated factor 3	ORFL147C
25902	MTHFD1L	Monofunctional C1-tetrahydrofolate synthase, mitochondrial	ORFL147C, RL6
23295	MGRN1	E3 ubiquitin-protein ligase MGRN1	UL78
23327	NEDD4L	E3 ubiquitin-protein ligase NEDD4-like	UL55, UL42, US30, UL20, UL133
11342	RNF13	E3 ubiquitin-protein ligase RNF13	UL20
11060	WWP2	NEDD4-like E3 ubiquitin-protein ligase WWP2	UL55, UL80.5, US30
57505	AARS2	Alanine--tRNA ligase, mitochondrial	UL16, UL14
5096	PCCB	Propionyl-CoA carboxylase beta chain, mitochondrial	UL50
5095	PCCA	Propionyl-CoA carboxylase alpha chain, mitochondrial	UL50, RL9A, UL102
5198	PFAS	Phosphoribosylformylglycinamidine synthase	RL6
55819	RNF130	E3 ubiquitin-protein ligase RNF130	UL148A
5091	PC	Pyruvate carboxylase, mitochondrial	UL27
3980	LIG3	DNA ligase 3	RL8A, UL132, UL55, UL86
2180	ACSL1	Long-chain-fatty-acid--CoA ligase 1	US23, UL14, UL135
51070	NOSIP	Nitric oxide synthase-interacting protein	UL83
54778	RNF111	E3 ubiquitin-protein ligase Arkadia	UL94
8801	SUCLG2	Succinate--CoA ligase [GDP-forming] subunit beta, mitochondrial	UL16
64087	MCCC2	Methylcrotonoyl-CoA carboxylase beta chain, mitochondrial	UL8, US12
91445	RNF185	E3 ubiquitin-protein ligase RNF185	UL148C
2182	ACSL4	Long-chain-fatty-acid--CoA ligase 4	UL86
Chaperonin-containing T-complex p=0.000164
10575	CCT4	T-complex protein 1 subunit delta	UL70
10576	CCT2	T-complex protein 1 subunit beta	UL70
908	CCT6A	T-complex protein 1 subunit zeta	UL70
10574	CCT7	T-complex protein 1 subunit eta	UL70
6950	TCP1	T-complex protein 1 subunit alpha	UL70
22948	CCT5	T-complex protein 1 subunit epsilon	UL70
7203	CCT3	T-complex protein 1 subunit gamma	UL70
10694	CCT8	T-complex protein 1 subunit theta	UL16
mRNA export from nucleus p=0.000477
79023	NUP37	Nucleoporin Nup37	UL50, UL26
9984	THOC1	THO complex subunit 1	UL86
22794	CASC3	Protein CASC3	US26
23279	NUP160	Nuclear pore complex protein Nup160	UL132
51692	CPSF3	Cleavage and polyadenylation specificity factor subunit 3	UL26
9883	POM121	Nuclear envelope pore membrane protein POM 121	US26
23293	SMG6	Telomerase-binding protein EST1A	US26
4928	NUP98	Nuclear pore complex protein Nup98-Nup96	UL8
84324	SARNP	SAP domain-containing ribonucleoprotein	UL45
348995	NUP43	Nucleoporin Nup43	UL50, UL55
9972	NUP153	Nuclear pore complex protein Nup153	UL94
10569	SLU7	Pre-mRNA-splicing factor SLU7	US26
8480	RAE1	mRNA export factor	UL8
10772	SRSF10	Serine/arginine-rich splicing factor 10	RL6
29894	CPSF1	Cleavage and polyadenylation specificity factor subunit 1	UL8, UL26
53981	CPSF2	Cleavage and polyadenylation specificity factor subunit 2	UL26
9939	RBM8A	RNA-binding protein 8A	RL6, UL132
6430	SRSF5	Serine/arginine-rich splicing factor 5	RL6, UL44
4686	NCBP1	Nuclear cap-binding protein subunit 1	UL130
10212	DDX39A	ATP-dependent RNA helicase DDX39A	UL27, UL122, UL14
100101267	POM121C	Nuclear envelope pore membrane protein POM 121C	US26
8086	AAAS	Aladin	UL132
8683	SRSF9	Serine/arginine-rich splicing factor 9	UL44
7884	SLBP	Histone RNA hairpin-binding protein	US26
6429	SRSF4	Serine/arginine-rich splicing factor 4	UL44
23049	SMG1	Serine/threonine-protein kinase SMG1	UL16, US7
9785	DHX38	Pre-mRNA-splicing factor ATP-dependent RNA helicase PRP16	UL2, US26, UL133
10762	NUP50	Nuclear pore complex protein Nup50	UL8
65109	UPF3B	Regulator of nonsense transcripts 3B	US9
Isomerase p=0.00115
63826	SRR	Serine racemase	UL20
5300	PIN1	Peptidyl-prolyl cis-trans isomerase NIMA-interacting 1	RL6, UL132, US12
5223	PGAM1	Phosphoglycerate mutase 1	UL56
4047	LSS	Lanosterol synthase	UL14, US9, UL132, UL86, UL47
54517	PUS7	Pseudouridylate synthase 7 homolog	RL6
2582	GALE	UDP-glucose 4-epimerase	ORFL147C
51661	FKBP7	Peptidyl-prolyl cis-trans isomerase FKBP7	RL6, UL132, UL47
7155	TOP2B	DNA topoisomerase 2-beta	UL9
7153	TOP2A	DNA topoisomerase 2-alpha	UL9, RL8A, UL20, UL30, UL86, RL6, UL150A, UL105, UL19, UL32
55276	PGM2	Phosphoglucomutase-2	US12, UL56, UL122
1736	DKC1	H/ACA ribonucleoprotein complex subunit 4	UL8, UL44
60681	FKBP10	Peptidyl-prolyl cis-trans isomerase FKBP10	ORFL147C
2289	FKBP5	Peptidyl-prolyl cis-trans isomerase FKBP5	UL70
51645	PPIL1	Peptidyl-prolyl cis-trans isomerase-like 1	UL8, US26
10105	PPIF	Peptidyl-prolyl cis-trans isomerase F, mitochondrial	ORFL147C, RL6
51477	ISYNA1	Inositol-3-phosphate synthase 1	US12
51303	FKBP11	Peptidyl-prolyl cis-trans isomerase FKBP11	UL14
5481	PPID	Peptidyl-prolyl cis-trans isomerase D	RL6
4820	NKTR	NK-tumor recognition protein	UL94
2287	FKBP3	Peptidyl-prolyl cis-trans isomerase FKBP3	RL6, UL132, UL47
7264	TSTA3	GDP-L-fucose synthase	UL114, UL88
4594	MUT	Methylmalonyl-CoA mutase, mitochondrial	UL77, ORFS343C
10455	ECI2	Enoyl-CoA delta isomerase 2, mitochondrial	ORFL147C
10450	PPIE	Peptidyl-prolyl cis-trans isomerase E	UL148D
3422	IDI1	Isopentenyl-diphosphate Delta-isomerase 1	UL13, UL27
53938	PPIL3	Peptidyl-prolyl cis-trans isomerase-like 3	US26
128240	NAXE	NAD(P)H-hydrate epimerase	US23
VCP-NPL4-UFD1 AAA ATPase complex p=0.00252
79139	DERL1	Derlin-1	UL148A
51035	UBXN1	UBX domain-containing protein 1	RL6
23197	FAF2	FAS-associated factor 2	US30
7353	UFD1L	Ubiquitin fusion degradation protein 1 homolog	US30
7415	VCP	Transitional endoplasmic reticulum ATPase	US30
55666	NPLOC4	Nuclear protein localization protein 4 homolog	US30
857	CAV1	Caveolin-1	UL8
14-3-3 protein p=0.00326
10971	YWHAQ	14-3-3 protein theta	UL43
7529	YWHAB	14-3-3 protein beta/alpha	UL43
2810	SFN	14-3-3 protein sigma	UL56
7534	YWHAZ	14-3-3 protein zeta/delta	UL43
7533	YWHAH	14-3-3 protein eta	UL43
7532	YWHAG	14-3-3 protein gamma	UL43
7531	YWHAE	14-3-3 protein epsilon	UL43
Mitochondrial translational elongation p=0.00532
56945	MRPS22	28S ribosomal protein S22, mitochondrial	UL44, UL22A, UL26
64432	MRPS25	28S ribosomal protein S25, mitochondrial	UL44
65993	MRPS34	28S ribosomal protein S34, mitochondrial	UL44, UL9, RL8A, UL135
51373	MRPS17	28S ribosomal protein S17, mitochondrial	UL44
54534	MRPL50	39S ribosomal protein L50, mitochondrial	UL84
64949	MRPS26	28S ribosomal protein S26, mitochondrial	UL44
51081	MRPS7	28S ribosomal protein S7, mitochondrial	UL44
60488	MRPS35	28S ribosomal protein S35, mitochondrial	UL44
64975	MRPL41	39S ribosomal protein L41, mitochondrial	UL44
55168	MRPS18A	28S ribosomal protein S18a, mitochondrial	UL132
28998	MRPL13	39S ribosomal protein L13, mitochondrial	UL84, US9
28973	MRPS18B	28S ribosomal protein S18b, mitochondrial	UL44, UL121, UL80.5
7818	DAP3	28S ribosomal protein S29, mitochondrial	UL44, UL30A, UL22A
10102	TSFM	Elongation factor Ts, mitochondrial	US8
65005	MRPL9	39S ribosomal protein L9, mitochondrial	UL44
64978	MRPL38	39S ribosomal protein L38, mitochondrial	UL44, UL26
57129	MRPL47	39S ribosomal protein L47, mitochondrial	UL44
64965	MRPS9	28S ribosomal protein S9, mitochondrial	UL44
54948	MRPL16	39S ribosomal protein L16, mitochondrial	UL135
85476	GFM1	Elongation factor G, mitochondrial	RL6, US7, UL45
64960	MRPS15	28S ribosomal protein S15, mitochondrial	US22, UL94
29074	MRPL18	39S ribosomal protein L18, mitochondrial	UL44
10240	MRPS31	28S ribosomal protein S31, mitochondrial	UL44
55037	PTCD3	Pentatricopeptide repeat domain-containing protein 3, mitochondrial	UL44
Glycation p=0.00567
4137	MAPT	Microtubule-associated protein tau	UL100, ORFL147C
6649	SOD3	Extracellular superoxide dismutase [Cu-Zn]	UL74
567	B2M	Beta-2-microglobulin	UL18
3043	HBB	Hemoglobin subunit beta	UL56, RL9A, UL48
629	CFB	Complement factor B	UL56
348	APOE	Apolipoprotein E	UL88
335	APOA1	Apolipoprotein A-I	UL56, UL88
Thick filament p=0.00778
4621	MYH3	Myosin-3	US28
4620	MYH2	Myosin-2	US28
57644	MYH7B	Myosin-7B	US28
4622	MYH4	Myosin-4	US28
4625	MYH7	Myosin-7	US28
4624	MYH6	Myosin-6	US28
4619	MYH1	Myosin-1	US28
4606	MYBPC2	Myosin-binding protein C, fast-type	US28
Rotamase p=0.00801
10105	PPIF	Peptidyl-prolyl cis-trans isomerase F, mitochondrial	ORFL147C, RL6
51303	FKBP11	Peptidyl-prolyl cis-trans isomerase FKBP11	UL14
5300	PIN1	Peptidyl-prolyl cis-trans isomerase NIMA-interacting 1	RL6, UL132, US12
5481	PPID	Peptidyl-prolyl cis-trans isomerase D	RL6
4820	NKTR	NK-tumor recognition protein	UL94
2287	FKBP3	Peptidyl-prolyl cis-trans isomerase FKBP3	RL6, UL132, UL47
51661	FKBP7	Peptidyl-prolyl cis-trans isomerase FKBP7	RL6, UL132, UL47
60681	FKBP10	Peptidyl-prolyl cis-trans isomerase FKBP10	ORFL147C
2289	FKBP5	Peptidyl-prolyl cis-trans isomerase FKBP5	UL70
10450	PPIE	Peptidyl-prolyl cis-trans isomerase E	UL148D
51645	PPIL1	Peptidyl-prolyl cis-trans isomerase-like 1	UL8, US26
53938	PPIL3	Peptidyl-prolyl cis-trans isomerase-like 3	US26
Histone deacetylation p=0.0111
100526737	RBM14	RNA-binding protein 14	US22
1108	CHD4	Chromodomain-helicase-DNA-binding protein 4	UL29, UL38
5928	RBBP4	Histone-binding protein RBBP4	US14, US12
79718	TBL1XR1	F-box-like/WD repeat-containing protein TBL1XR1	UL29
9734	HDAC9	Histone deacetylase 9	UL19
1107	CHD3	Chromodomain-helicase-DNA-binding protein 3	UL29, UL38
9759	HDAC4	Histone deacetylase 4	UL122
57504	MTA3	Metastasis-associated protein MTA3	UL29, UL38
53615	MBD3	Methyl-CpG-binding domain protein 3	UL29, UL38
9219	MTA2	Metastasis-associated protein MTA2	UL29
9112	MTA1	Metastasis-associated protein MTA1	UL29, UL29, UL38, UL22A, UL20
6907	TBL1X	F-box-like/WD repeat-containing protein TBL1X	UL29, US26, UL94, UL150A, UL30
3065	HDAC1	Histone deacetylase 1	UL29
23028	KDM1A	Lysine-specific histone demethylase 1A	UL8
23411	SIRT1	NAD-dependent protein deacetylase sirtuin-1	UL94
5931	RBBP7	Histone-binding protein RBBP7	UL38, UL29
Repressor p=0.0114
10346	TRIM22	E3 ubiquitin-protein ligase TRIM22	UL71
7536	SF1	Splicing factor 1	US26
4149	MAX	Protein max	UL94
9969	MED13	Mediator of RNA polymerase II transcription subunit 13	UL94, US7
4204	MECP2	Methyl-CpG-binding protein 2	RL6, UL9, UL132
23512	SUZ12	Polycomb protein SUZ12	UL9, UL21A, UL19, UL30, US33A, RL8A
6597	SMARCA4	Transcription activator BRG1	US26
25920	NELFB	Negative elongation factor B	US9, UL86, ORFL147C
51535	PPHLN1	Periphilin-1	US22
196	AHR	Aryl hydrocarbon receptor	UL19
8841	HDAC3	Histone deacetylase 3	UL29, UL94, US26
221937	FOXK1	Forkhead box protein K1	UL123, UL140, UL9, ORFL147C
1523	CUX1	Homeobox protein cut-like 1	US12
23272	FAM208A	Protein TASOR	US22
51274	KLF3	Krueppel-like factor 3	US26
5987	TRIM27	Zinc finger protein RFP	UL26
10614	HEXIM1	Protein HEXIM1	UL83
29995	LMCD1	LIM and cysteine-rich domains protein 1	UL13, UL14
29128	UHRF1	E3 ubiquitin-protein ligase UHRF1	RL6
23034	SAMD4A	Protein Smaug homolog 1	UL9
54815	GATAD2A	Transcriptional repressor p66-alpha	UL29, UL38, RL6, UL20, UL9, UL86, US34A
9612	NCOR2	Nuclear receptor corepressor 2	UL29, US26, UL94, ORFS343C, UL150A, US9
1487	CTBP1	C-terminal-binding protein 1	UL14
100526737	RBM14	RNA-binding protein 14	US22
79811	SLTM	SAFB-like transcription modulator	US22, US26, RL6, UL30, US33A
9611	NCOR1	Nuclear receptor corepressor 1	UL29, US26, UL94, UL55
5928	RBBP4	Histone-binding protein RBBP4	US14, US12
79718	TBL1XR1	F-box-like/WD repeat-containing protein TBL1XR1	UL29
6294	SAFB	Scaffold attachment factor B1	US22
57215	THAP11	THAP domain-containing protein 11	US22
4849	CNOT3	CCR4-NOT transcription complex subunit 3	UL72
4848	CNOT2	CCR4-NOT transcription complex subunit 2	UL72
165	AEBP1	Adipocyte enhancer-binding protein 1	UL40
5036	PA2G4	Proliferation-associated protein 2G4	UL56
8683	SRSF9	Serine/arginine-rich splicing factor 9	UL44
1616	DAXX	Death domain-associated protein 6	UL82
8726	EED	Polycomb protein EED	UL9
9112	MTA1	Metastasis-associated protein MTA1	UL29, UL29, UL38, UL22A, UL20
6015	RING1	E3 ubiquitin-protein ligase RING1	US22
2909	ARHGAP35	Rho GTPase-activating protein 35	UL150A
23028	KDM1A	Lysine-specific histone demethylase 1A	UL8
4791	NFKB2	Nuclear factor NF-kappa-B p100 subunit	US27, UL8
29883	CNOT7	CCR4-NOT transcription complex subunit 7	UL72
5931	RBBP7	Histone-binding protein RBBP7	UL38, UL29
11278	KLF12	Krueppel-like factor 12	US26
26145	IRF2BP1	Interferon regulatory factor 2-binding protein 1	UL148C
51497	NELFCD	Negative elongation factor C/D	ORFL147C, UL150A, UL47
56946	EMSY	BRCA2-interacting transcriptional repressor EMSY	US22
84458	C10orf12	Uncharacterized protein C10orf12	UL9, UL32
1024	CDK8	Cyclin-dependent kinase 8	UL50
6945	MLX	Max-like protein X	UL94
359948	IRF2BP2	Interferon regulatory factor 2-binding protein 2	UL132, UL55
5511	PPP1R8	Nuclear inhibitor of protein phosphatase 1	ORFS343C, RL6, UL50
27316	RBMX	RNA-binding motif protein, X chromosome	US22
9125	RQCD1	Cell differentiation protein RCD1 homolog	UL72
23019	CNOT1	CCR4-NOT transcription complex subunit 1	UL72, UL72
51341	ZBTB7A	Zinc finger and BTB domain-containing protein 7A	US26
23429	RYBP	RING1 and YY1-binding protein	US22, ORFL147C
57459	GATAD2B	Transcriptional repressor p66-beta	UL8, US18, UL29
4017	LOXL2	Lysyl oxidase homolog 2	UL40
10514	MYBBP1A	Myb-binding protein 1A	UL9, UL132, UL19, UL150A, UL30, RL6, UL20, UL105, UL32
29969	MDFIC	MyoD family inhibitor domain-containing protein	UL148A, UL8
79576	NKAP	NF-kappa-B-activating protein	UL57
9734	HDAC9	Histone deacetylase 9	UL19
9759	HDAC4	Histone deacetylase 4	UL122
23528	ZNF281	Zinc finger protein 281	UL103, UL122, UL52
6667	SP1	Transcription factor Sp1	US22
2736	GLI2	Zinc finger protein GLI2	US19
7157	TP53	Cellular tumor antigen p53	UL29, UL38
5725	PTBP1	Polypyrimidine tract-binding protein 1	ORFL147C
9667	SAFB2	Scaffold attachment factor B2	US22
57680	CHD8	Chromodomain-helicase-DNA-binding protein 8	US12
6670	SP3	Transcription factor Sp3	US22
3065	HDAC1	Histone deacetylase 1	UL29
50804	MYEF2	Myelin expression factor 2	UL44
6429	SRSF4	Serine/arginine-rich splicing factor 4	UL44
3428	IFI16	Gamma-interferon-inducible protein 16	UL83
8848	TSC22D1	TSC22 domain family protein 1	UL50
3068	HDGF	Hepatoma-derived growth factor	UL45
23598	PATZ1	POZ-, AT hook-, and zinc finger-containing protein 1	US22
9337	CNOT8	CCR4-NOT transcription complex subunit 8	UL72
Mitotic chromosome condensation p=0.0115
5066	PAM	Peptidyl-glycine alpha-amidating monooxygenase	US27, UL100
64151	NCAPG	Condensin complex subunit 3	UL16
26993	AKAP8L	A-kinase anchor protein 8-like	US22
23397	NCAPH	Condensin complex subunit 2	UL132, UL19, UL9
51203	NUSAP1	Nucleolar and spindle-associated protein 1	UL82
23310	NCAPD3	Condensin-2 complex subunit D3	UL16
7273	TTN	Titin	US28, UL55
10270	AKAP8	A-kinase anchor protein 8	US22
9918	NCAPD2	Condensin complex subunit 1	UL150A, UL132, UL19, UL20, UL86, UL9
Steroid biosynthesis p=0.0129
2224	FDPS	Farnesyl pyrophosphate synthase	UL16
6307	MSMO1	Methylsterol monooxygenase 1	UL148A
84681	HINT2	Histidine triad nucleotide-binding protein 2, mitochondrial	RL6, UL47
4047	LSS	Lanosterol synthase	UL14, US9, UL132, UL86, UL47
4597	MVD	Diphosphomevalonate decarboxylase	UL121
3156	HMGCR	3-hydroxy-3-methylglutaryl-coenzyme A reductase	UL148C
3157	HMGCS1	Hydroxymethylglutaryl-CoA synthase, cytoplasmic	UL56, RL6, UL2
1595	CYP51A1	Lanosterol 14-alpha demethylase	UL30
51706	CYB5R1	NADH-cytochrome b5 reductase 1	US14
3422	IDI1	Isopentenyl-diphosphate Delta-isomerase 1	UL13, UL27
51170	HSD17B11	Estradiol 17-beta-dehydrogenase 11	UL71
Cell cycle p=0.0131
153090	DAB2IP	Disabled homolog 2-interacting protein	US9
79184	BRCC3	Lys-63-specific deubiquitinase BRCC36	US26
90293	KLHL13	Kelch-like protein 13	IRS1
8883	NAE1	NEDD8-activating enzyme E1 regulatory subunit	UL27, ORFS343C
79187	FSD1	Fibronectin type III and SPRY domain-containing protein 1	UL50
147841	SPC24	Kinetochore protein Spc24	UL47
6598	SMARCB1	SWI/SNF-related matrix-associated actin-dependent regulator of chromatin subfamily B member 1	UL99
64151	NCAPG	Condensin complex subunit 3	UL16
29127	RACGAP1	Rac GTPase-activating protein 1	US26
23172	FAM175B	BRISC complex subunit Abro1	US26
11190	CEP250	Centrosome-associated protein CEP250	US28
55844	PPP2R2D	Serine/threonine-protein phosphatase 2A 55 kDa regulatory subunit B delta isoform	UL17, UL71
1104	RCC1	Regulator of chromosome condensation	RL6, UL132, ORFL147C
51530	ZC3HC1	Nuclear-interacting partner of ALK	UL71
55743	CHFR	E3 ubiquitin-protein ligase CHFR	UL54, UL114
196	AHR	Aryl hydrocarbon receptor	UL19
10296	MAEA	Macrophage erythroblast attacher	UL26
9101	USP8	Ubiquitin carboxyl-terminal hydrolase 8	US7
27338	UBE2S	Ubiquitin-conjugating enzyme E2 S	RL6, US12
51776	ZAK	Mitogen-activated protein kinase kinase kinase MLT	US26
10197	PSME3	Proteasome activator complex subunit 3	UL27, UL33
9493	KIF23	Kinesin-like protein KIF23	US26, UL20
29128	UHRF1	E3 ubiquitin-protein ligase UHRF1	RL6
701	BUB1B	Mitotic checkpoint serine/threonine-protein kinase BUB1 beta	US14
9656	MDC1	Mediator of DNA damage checkpoint protein 1	RL6, UL132, UL150A
5928	RBBP4	Histone-binding protein RBBP4	US14, US12
2908	NR3C1	Glucocorticoid receptor	UL16
11140	CDC37	Hsp90 co-chaperone Cdc37	UL70
11180	WDR6	WD repeat-containing protein 6	UL26, UL80.5, US1, UL9, UL29, UL150A
79892	MCMBP	Mini-chromosome maintenance complex-binding protein	UL47, UL140
9918	NCAPD2	Condensin complex subunit 1	UL150A, UL132, UL19, UL20, UL86, UL9
55958	KLHL9	Kelch-like protein 9	IRS1
64975	MRPL41	39S ribosomal protein L41, mitochondrial	UL44
6197	RPS6KA3	Ribosomal protein S6 kinase alpha-3	UL26, UL25
10628	TXNIP	Thioredoxin-interacting protein	UL132, UL19
83858	ATAD3B	ATPase family AAA domain-containing protein 3B	US22
9150	CTDP1	RNA polymerase II subunit A C-terminal domain phosphatase	US19
56647	BCCIP	BRCA2 and CDKN1A-interacting protein	RL6, ORFS343C
54820	NDE1	Nuclear distribution protein nudE homolog 1	UL94, US26
8450	CUL4B	Cullin-4B	UL19, UL19, RL1
23310	NCAPD3	Condensin-2 complex subunit D3	UL16
23063	WAPL	Wings apart-like protein homolog	UL94, US9, UL74, RL8A
8208	CHAF1B	Chromatin assembly factor 1 subunit B	UL9
440275	EIF2AK4	eIF-2-alpha kinase GCN2	UL150A
6195	RPS6KA1	Ribosomal protein S6 kinase alpha-1	UL26
1457	CSNK2A1	Casein kinase II subunit alpha	UL84
23637	RABGAP1	Rab GTPase-activating protein 1	UL132, US27, UL100, US13
8099	CDK2AP1	Cyclin-dependent kinase 2-associated protein 1	UL29
1459	CSNK2A2	Casein kinase II subunit alpha'	UL84, UL135, US7, UL22A, US34A
5414	SEPT4	Septin-4	UL135
79023	NUP37	Nucleoporin Nup37	UL50, UL26
1452	CSNK1A1	Casein kinase I isoform alpha	UL56
23397	NCAPH	Condensin complex subunit 2	UL132, UL19, UL9
2033	EP300	Histone acetyltransferase p300	UL31, UL26
51203	NUSAP1	Nucleolar and spindle-associated protein 1	UL82
8091	HMGA2	High mobility group protein HMGI-C	RL6, UL132
6793	STK10	Serine/threonine-protein kinase 10	UL13, US7
311	ANXA11	Annexin A11	US22
23291	FBXW11	F-box/WD repeat-containing protein 11	US24, UL30A, US22, US24
55165	CEP55	Centrosomal protein of 55 kDa	UL80.5
25909	AHCTF1	Protein ELYS	UL9, UL132, UL30
29086	BABAM1	BRISC and BRCA1-A complex member 1	US26, UL70, UL150
51343	FZR1	Fizzy-related protein homolog	UL83, US19
157313	CDCA2	Cell division cycle-associated protein 2	US26
348995	NUP43	Nucleoporin Nup43	UL50, UL55
8812	CCNK	Cyclin-K	UL150A
6683	SPAST	Spastin	US14
5655	KLK10	Kallikrein-10	UL122, UL56, UL139
5347	PLK1	Serine/threonine-protein kinase PLK1	UL132
5289	PIK3C3	Phosphatidylinositol 3-kinase catalytic subunit type 3	UL16, UL132, UL77
10735	STAG2	Cohesin subunit SA-2	UL135, US7
23244	PDS5A	Sister chromatid cohesion protein PDS5 homolog A	UL16
5300	PIN1	Peptidyl-prolyl cis-trans isomerase NIMA-interacting 1	RL6, UL132, US12
5898	RALA	Ras-related protein Ral-A	UL140, UL130
699	BUB1	Mitotic checkpoint serine/threonine-protein kinase BUB1	UL20
9525	VPS4B	Vacuolar protein sorting-associated protein 4B	US16, US14
91603	ZNF830	Zinc finger protein 830	UL80.5, US19, UL8
257364	SNX33	Sorting nexin-33	UL82
3014	H2AFX	Histone H2AX	UL56
55207	ARL8B	ADP-ribosylation factor-like protein 8B	US27
7157	TP53	Cellular tumor antigen p53	UL29, UL38
3980	LIG3	DNA ligase 3	RL8A, UL132, UL55, UL86
80346	REEP4	Receptor expression-enhancing protein 4	UL148A
4288	MKI67	Proliferation marker protein Ki-67	UL9, US13, UL80.5, UL20, RL8A, UL32, UL86, UL150A, US27, RL6, UL105
8914	TIMELESS	Protein timeless homolog	UL16
57448	BIRC6	Baculoviral IAP repeat-containing protein 6	UL94
10783	NEK6	Serine/threonine-protein kinase Nek6	UL94
COP9 signalosome p=0.0133
3305	HSPA1L	Heat shock 70 kDa protein 1-like	UL70
2873	GPS1	COP9 signalosome complex subunit 1	UL33
8533	COPS3	COP9 signalosome complex subunit 3	US12, US14
2885	GRB2	Growth factor receptor-bound protein 2	UL26
11180	WDR6	WD repeat-containing protein 6	UL26, UL80.5, US1, UL9, UL29, UL150A
3310	HSPA6	Heat shock 70 kDa protein 6	UL70
64708	COPS7B	COP9 signalosome complex subunit 7b	UL22A
9730	VPRBP	Protein VPRBP	UL35, US30
51517	NCKIPSD	NCK-interacting protein with SH3 domain	UL86
10987	COPS5	COP9 signalosome complex subunit 5	UL19
8655	DYNLL1	Dynein light chain 1, cytoplasmic	UL50
10211	FLOT1	Flotillin-1	UL26
Muscle myosin complex p=0.014
4621	MYH3	Myosin-3	US28
4620	MYH2	Myosin-2	US28
4622	MYH4	Myosin-4	US28
4625	MYH7	Myosin-7	US28
4624	MYH6	Myosin-6	US28
7273	TTN	Titin	US28, UL55
4619	MYH1	Myosin-1	US28
29895	MYLPF	Myosin regulatory light chain 2, skeletal muscle isoform	US28
SH3 domain binding p=0.015
153090	DAB2IP	Disabled homolog 2-interacting protein	US9
64397	ZNF106	Zinc finger protein 106	US26
9829	DNAJC6	Putative tyrosine-protein phosphatase auxilin	UL47
57514	ARHGAP31	Rho GTPase-activating protein 31	US26
2697	GJA1	Gap junction alpha-1 protein	UL42, UL148A, UL148C, UL100, US21
9101	USP8	Ubiquitin carboxyl-terminal hydrolase 8	US7
63916	ELMO2	Engulfment and cell motility protein 2	UL16
102	ADAM10	Disintegrin and metalloproteinase domain-containing protein 10	US3
51517	NCKIPSD	NCK-interacting protein with SH3 domain	UL86
23616	SH3BP1	SH3 domain-binding protein 1	US12
9444	QKI	Protein quaking	US7, UL99
8506	CNTNAP1	Contactin-associated protein 1	US21, US9, UL55
6451	SH3BGRL	SH3 domain-binding glutamic acid-rich-like protein	RL6, UL45, US7, US8, UL133
64780	MICAL1	[F-actin]-methionine sulfoxide oxidase MICAL1	UL2
140885	SIRPA	Tyrosine-protein phosphatase non-receptor type substrate 1	US27
4137	MAPT	Microtubule-associated protein tau	UL100, ORFL147C
392	ARHGAP1	Rho GTPase-activating protein 1	UL56, RL6
2060	EPS15	Epidermal growth factor receptor substrate 15	UL94
84665	MYPN	Myopalladin	UL55
8754	ADAM9	Disintegrin and metalloproteinase domain-containing protein 9	UL14
1793	DOCK1	Dedicator of cytokinesis protein 1	ORFL147C, UL86, US9
5359	PLSCR1	Phospholipid scramblase 1	UL8, UL148A
9844	ELMO1	Engulfment and cell motility protein 1	UL135
2885	GRB2	Growth factor receptor-bound protein 2	UL26
10006	ABI1	Abl interactor 1	UL135, UL50, US19
84251	SGIP1	SH3-containing GRB2-like protein 3-interacting protein 1	UL121
4067	LYN	Tyrosine-protein kinase Lyn	UL20
2530	FUT8	Alpha-(1,6)-fucosyltransferase	UL16
repeat:WD 3 p=0.018
1477	CSTF1	Cleavage stimulation factor subunit 1	UL80.5
22872	SEC31A	Protein transport protein Sec31A	US7
1762	DMWD	Dystrophia myotonica WD repeat-containing protein	UL138
64397	ZNF106	Zinc finger protein 106	US26
55844	PPP2R2D	Serine/threonine-protein phosphatase 2A 55 kDa regulatory subunit B delta isoform	UL17, UL71
8925	HERC1	Probable E3 ubiquitin-protein ligase HERC1	US34A
55339	WDR33	pre-mRNA 3' end processing protein WDR33	UL26, US26, UL84, US7, UL122
29888	STRN4	Striatin-4	US9
50717	DCAF8	DDB1- and CUL4-associated factor 8	UL74
55759	WDR12	Ribosome biogenesis protein WDR12	ORFS343C
9391	CIAO1	Probable cytosolic iron-sulfur protein assembly protein CIAO1	UL23, UL16, US9
5928	RBBP4	Histone-binding protein RBBP4	US14, US12
79718	TBL1XR1	F-box-like/WD repeat-containing protein TBL1XR1	UL29
54468	MIOS	WD repeat-containing protein mio	UL94, ORFL147C
11180	WDR6	WD repeat-containing protein 6	UL26, UL80.5, US1, UL9, UL29, UL150A
80232	WDR26	WD repeat-containing protein 26	UL26, UL25, US8, UL80.5
57590	WDFY1	WD repeat and FYVE domain-containing protein 1	US27
55294	FBXW7	F-box/WD repeat-containing protein 7	UL20, US22
8726	EED	Polycomb protein EED	UL9
57599	WDR48	WD repeat-containing protein 48	UL138
8208	CHAF1B	Chromatin assembly factor 1 subunit B	UL9
84231	TRAF7	E3 ubiquitin-protein ligase TRAF7	UL80.5
54828	BCAS3	Breast carcinoma-amplified sequence 3	UL50
5931	RBBP7	Histone-binding protein RBBP7	UL38, UL29
6801	STRN	Striatin	US9
79023	NUP37	Nucleoporin Nup37	UL50, UL26
8945	BTRC	F-box/WD repeat-containing protein 1A	US24, UL30A, US23
79269	DCAF10	DDB1- and CUL4-associated factor 10	US18, US20
5520	PPP2R2A	Serine/threonine-protein phosphatase 2A 55 kDa regulatory subunit B alpha isoform	UL71, UL17
5521	PPP2R2B	Serine/threonine-protein phosphatase 2A 55 kDa regulatory subunit B beta isoform	UL71
8816	DCAF5	DDB1- and CUL4-associated factor 5	UL80.5
23291	FBXW11	F-box/WD repeat-containing protein 11	US24, UL30A, US22, US24
55250	ELP2	Elongator complex protein 2	ORFL147C
51343	FZR1	Fizzy-related protein homolog	UL83, US19
348995	NUP43	Nucleoporin Nup43	UL50, UL55
91833	WDR20	WD repeat-containing protein 20	UL138
6907	TBL1X	F-box-like/WD repeat-containing protein TBL1X	UL29, US26, UL94, UL150A, UL30
11137	PWP1	Periodic tryptophan protein 1 homolog	UL44
1643	DDB2	DNA damage-binding protein 2	UL132, UL150A, UL55, ORFL147C, UL86, UL47, US9, RL8A
7273	TTN	Titin	US28, UL55
8480	RAE1	mRNA export factor	UL8
22898	DENND3	DENN domain-containing protein 3	US26
23246	BOP1	Ribosome biogenesis protein BOP1	US7, UL132, US34A
29966	STRN3	Striatin-3	US9
8086	AAAS	Aladin	UL132
11169	WDHD1	WD repeat and HMG-box DNA-binding protein 1	UL86
10552	ARPC1A	Actin-related protein 2/3 complex subunit 1A	UL56, ORFL147C, UL122, UL47, US34A
1781	DYNC1I2	Cytoplasmic dynein 1 intermediate chain 2	US8
222229	LRWD1	Leucine-rich repeat and WD repeat-containing protein 1	RL6, UL132
Endoplasmic reticulum quality control compartment p=0.0219
84236	RHBDD1	Rhomboid-related protein 4	UL148
26270	FBXO6	F-box only protein 6	UL74, UL20, UL55
11253	MAN1B1	Endoplasmic reticulum mannosyl-oligosaccharide 1,2-alpha-mannosidase	UL20
55757	UGGT2	UDP-glucose:glycoprotein glucosyltransferase 2	UL40, UL74, UL130
80267	EDEM3	ER degradation-enhancing alpha-mannosidase-like protein 3	UL16, US9, UL74, US14, US18
55741	EDEM2	ER degradation-enhancing alpha-mannosidase-like protein 2	UL74
51009	DERL2	Derlin-2	US14
AP-2 adaptor complex p=0.0219
161	AP2A2	AP-2 complex subunit alpha-2	UL132
9779	TBC1D5	TBC1 domain family member 5	UL150A
2060	EPS15	Epidermal growth factor receptor substrate 15	UL94
1956	EGFR	Epidermal growth factor receptor	US12, US13, UL8
160	AP2A1	AP-2 complex subunit alpha-1	UL132
84251	SGIP1	SH3-containing GRB2-like protein 3-interacting protein 1	UL121
1173	AP2M1	AP-2 complex subunit mu	UL132, UL140, UL132
Protease inhibitor p=0.0268
1474	CST6	Cystatin-M	UL6, US23
1469	CST1	Cystatin-SN	UL121, UL130, US8, US6
1476	CSTB	Cystatin-B	UL56
8710	SERPINB7	Serpin B7	UL56, UL48, US23, US8
1294	COL7A1	Collagen alpha-1(VII) chain	UL55, UL150A, UL86, UL9
3827	KNG1	Kininogen-1	UL88, RL6, UL14
5345	SERPINF2	Alpha-2-antiplasmin	UL88
331	XIAP	E3 ubiquitin-protein ligase XIAP	UL145, UL147, UL13, UL38, UL54
334	APLP2	Amyloid-like protein 2	US3
3700	ITIH4	Inter-alpha-trypsin inhibitor heavy chain H4	UL150, UL56
5055	SERPINB2	Plasminogen activator inhibitor 2	UL56, UL122, US23
351	APP	Amyloid beta A4 protein	UL74, US3, UL20
12	SERPINA3	Alpha-1-antichymotrypsin	US20, US29
462	SERPINC1	Antithrombin-III	UL78, UL130, UL14
10653	SPINT2	Kunitz-type protease inhibitor 2	UL78
2	A2M	Alpha-2-macroglobulin	UL56
1992	SERPINB1	Leukocyte elastase inhibitor	UL56, US23, UL122
144568	A2ML1	Alpha-2-macroglobulin-like protein 1	US23, UL56
1472	CST4	Cystatin-S	UL121, UL49, US8, UL130, UL17, UL50, US6
57448	BIRC6	Baculoviral IAP repeat-containing protein 6	UL94
5275	SERPINB13	Serpin B13	UL56, US23, UL128
56925	LXN	Latexin	UL47, RL6
5265	SERPINA1	Alpha-1-antitrypsin	UL56, UL88, US10, UL87, UL15A
DNA damage p=0.0271
79184	BRCC3	Lys-63-specific deubiquitinase BRCC36	US26
25896	INTS7	Integrator complex subunit 7	UL132, UL75
29128	UHRF1	E3 ubiquitin-protein ligase UHRF1	RL6
6117	RPA1	Replication protein A 70 kDa DNA-binding subunit	UL105
6118	RPA2	Replication protein A 32 kDa subunit	US12, US14, UL105
9656	MDC1	Mediator of DNA damage checkpoint protein 1	RL6, UL132, UL150A
29844	TFPT	TCF3 fusion partner	UL20
79913	ACTR5	Actin-related protein 5	UL9
7508	XPC	DNA repair protein complementing XP-C cells	UL44
51366	UBR5	E3 ubiquitin-protein ligase UBR5	UL27, UL36, US26, UL74, US34, UL47
83666	PARP9	Poly [ADP-ribose] polymerase 9	UL150A, UL9, ORFL147C, US7
23476	BRD4	Bromodomain-containing protein 4	ORFL147C
55611	OTUB1	Ubiquitin thioesterase OTUB1	UL56
56647	BCCIP	BRCA2 and CDKN1A-interacting protein	RL6, ORFS343C
545	ATR	Serine/threonine-protein kinase ATR	UL16
8451	CUL4A	Cullin-4A	UL19, RL1, US7, RL12, UL122, UL135, US34A
8450	CUL4B	Cullin-4B	UL19, UL19, RL1
5930	RBBP6	E3 ubiquitin-protein ligase RBBP6	UL8
8208	CHAF1B	Chromatin assembly factor 1 subunit B	UL9
56946	EMSY	BRCA2-interacting transcriptional repressor EMSY	US22
2072	ERCC4	DNA repair endonuclease XPF	US26
84126	ATRIP	ATR-interacting protein	UL16
10273	STUB1	E3 ubiquitin-protein ligase CHIP	UL70
7415	VCP	Transitional endoplasmic reticulum ATPase	US30
2074	ERCC6	DNA excision repair protein ERCC-6	UL80.5, UL38, RL8A, UL9, ORFL147C
9907	AP5Z1	AP-5 complex subunit zeta-1	UL50, UL16
1025	CDK9	Cyclin-dependent kinase 9	UL40, UL94
2068	ERCC2	TFIIH basal transcription factor complex helicase XPD subunit	US9, UL20
23198	PSME4	Proteasome activator complex subunit 4	US31, US1
79068	FTO	Alpha-ketoglutarate-dependent dioxygenase FTO	RL6, UL47, US7, US8, ORFL147C
10010	TANK	TRAF family member-associated NF-kappa-B activator	US34A
51343	FZR1	Fizzy-related protein homolog	UL83, US19
29086	BABAM1	BRISC and BRCA1-A complex member 1	US26, UL70, UL150
7334	UBE2N	Ubiquitin-conjugating enzyme E2 N	RL6, UL56
51347	TAOK3	Serine/threonine-protein kinase TAO3	US16
1643	DDB2	DNA damage-binding protein 2	UL132, UL150A, UL55, ORFL147C, UL86, UL47, US9, RL8A
9320	TRIP12	E3 ubiquitin-protein ligase TRIP12	US7
7874	USP7	Ubiquitin carboxyl-terminal hydrolase 7	UL83
1642	DDB1	DNA damage-binding protein 1	UL27, UL19, UL145
79624	ARMT1	Protein-glutamate O-methyltransferase	UL14
26270	FBXO6	F-box only protein 6	UL74, UL20, UL55
84464	SLX4	Structure-specific endonuclease subunit SLX4	US26
11219	TREX2	Three prime repair exonuclease 2	UL56, UL122
65123	INTS3	Integrator complex subunit 3	RL6
3014	H2AFX	Histone H2AX	UL56
3980	LIG3	DNA ligase 3	RL8A, UL132, UL55, UL86
10075	HUWE1	E3 ubiquitin-protein ligase HUWE1	US32, US32
2965	GTF2H1	General transcription factor IIH subunit 1	US7
8914	TIMELESS	Protein timeless homolog	UL16
9031	BAZ1B	Tyrosine-protein kinase BAZ1B	UL9, RL6, UL30, UL21A, US33A, UL132
23049	SMG1	Serine/threonine-protein kinase SMG1	UL16, US7
COPII vesicle coat p=0.0359
10484	SEC23A	Protein transport protein Sec23A	UL26
10483	SEC23B	Protein transport protein Sec23B	UL26
22872	SEC31A	Protein transport protein Sec31A	US7
203547	VMA21	Vacuolar ATPase assembly integral membrane protein VMA21	UL148A
10802	SEC24A	Protein transport protein Sec24A	UL26
10427	SEC24B	Protein transport protein Sec24B	UL26
SNARE complex p=0.0429
23673	STX12	Syntaxin-12	UL148A, UL140, UL56, UL99, US27
23256	SCFD1	Sec1 family domain-containing protein 1	UL47
6810	STX4	Syntaxin-4	UL148A, US7
10228	STX6	Syntaxin-6	US27, UL100
8417	STX7	Syntaxin-7	UL148A, UL123, US27
10490	VTI1B	Vesicle transport through interaction with t-SNAREs homolog 1B	US27
8675	STX16	Syntaxin-16	US27, UL100
6844	VAMP2	Vesicle-associated membrane protein 2	UL13, UL99, UL100, US27
143187	VTI1A	Vesicle transport through interaction with t-SNAREs homolog 1A	US27
6845	VAMP7	Vesicle-associated membrane protein 7	US27, UL148A, UL20, US27
8775	NAPA	Alpha-soluble NSF attachment protein	UL56, UL123
9482	STX8	Syntaxin-8	UL148A, US27
53407	STX18	Syntaxin-18	UL47
63908	NAPB	Beta-soluble NSF attachment protein	UL56
FHA p=0.0459
5511	PPP1R8	Nuclear inhibitor of protein phosphatase 1	ORFS343C, RL6, UL50
9859	CEP170	Centrosomal protein of 170 kDa	US26
3607	FOXK2	Forkhead box protein K2	UL123, UL140
4288	MKI67	Proliferation marker protein Ki-67	UL9, US13, UL80.5, UL20, RL8A, UL32, UL86, UL150A, US27, RL6, UL105
7871	SLMAP	Sarcolemmal membrane-associated protein	US9, US9, UL19, UL123, UL10, UL135, RL6, UL22A
547	KIF1A	Kinesin-like protein KIF1A	UL89
55743	CHFR	E3 ubiquitin-protein ligase CHFR	UL54, UL114
23095	KIF1B	Kinesin-like protein KIF1B	US12, US14, UL43
9656	MDC1	Mediator of DNA damage checkpoint protein 1	RL6, UL132, UL150A
221937	FOXK1	Forkhead box protein K1	UL123, UL140, UL9, ORFL147C
domain:CTLH p=0.0464
10048	RANBP9	Ran-binding protein 9	UL26
10296	MAEA	Macrophage erythroblast attacher	UL26
4289	MKLN1	Muskelin	UL26
80232	WDR26	WD repeat-containing protein 26	UL26, UL25, US8, UL80.5
57610	RANBP10	Ran-binding protein 10	UL26
54994	GID8	Glucose-induced degradation protein 8 homolog	UL26, UL80.5, UL29
64795	RMND5A	Protein RMD5 homolog A	UL26
nucleotide phosphate-binding region:ATP p=0.0477
64802	NMNAT1	Nicotinamide/nicotinic acid mononucleotide adenylyltransferase 1	UL131A
140609	NEK7	Serine/threonine-protein kinase Nek7	UL94
1108	CHD4	Chromodomain-helicase-DNA-binding protein 4	UL29, UL38
55236	UBA6	Ubiquitin-like modifier-activating enzyme 6	RL6, UL30
1106	CHD2	Chromodomain-helicase-DNA-binding protein 2	US22
1107	CHD3	Chromodomain-helicase-DNA-binding protein 3	UL29, UL38
23517	SKIV2L2	Superkiller viralicidic activity 2-like 2	US26
60625	DHX35	Probable ATP-dependent RNA helicase DHX35	UL22A
5634	PRPS2	Ribose-phosphate pyrophosphokinase 2	US12
9451	EIF2AK3	Eukaryotic translation initiation factor 2-alpha kinase 3	US30
51776	ZAK	Mitogen-activated protein kinase kinase kinase MLT	US26
79009	DDX50	ATP-dependent RNA helicase DDX50	UL9
4619	MYH1	Myosin-1	US28
4921	DDR2	Discoidin domain-containing receptor 2	US27, UL148A, US14, UL20, UL8
5159	PDGFRB	Platelet-derived growth factor receptor beta	UL20
1186	CLCN7	H(+)/Cl(-) exchange transporter 7	US8, UL40
203	AK1	Adenylate kinase isoenzyme 1	RL6, US28, UL132, UL47, US23
204	AK2	Adenylate kinase 2, mitochondrial	UL70
9448	MAP4K4	Mitogen-activated protein kinase kinase kinase kinase 4	ORFS343C
55226	NAT10	RNA cytidine acetyltransferase	UL132
4216	MAP3K4	Mitogen-activated protein kinase kinase kinase 4	UL94
80224	NUBPL	Iron-sulfur protein NUBPL	UL19
55191	NADSYN1	Glutamine-dependent NAD(+) synthetase	UL75
3716	JAK1	Tyrosine-protein kinase JAK1	UL20
26007	TKFC	Triokinase/FMN cyclase	UL50
29904	EEF2K	Eukaryotic elongation factor 2 kinase	UL94
83858	ATAD3B	ATPase family AAA domain-containing protein 3B	US22
547	KIF1A	Kinesin-like protein KIF1A	UL89
440275	EIF2AK4	eIF-2-alpha kinase GCN2	UL150A
1457	CSNK2A1	Casein kinase II subunit alpha	UL84
1459	CSNK2A2	Casein kinase II subunit alpha'	UL84, UL135, US7, UL22A, US34A
22853	LMTK2	Serine/threonine-protein kinase LMTK2	US27
1452	CSNK1A1	Casein kinase I isoform alpha	UL56
55210	ATAD3A	ATPase family AAA domain-containing protein 3A	US22
6891	TAP2	Antigen peptide transporter 2	US21
7415	VCP	Transitional endoplasmic reticulum ATPase	US30
26289	AK5	Adenylate kinase isoenzyme 5	US28
2074	ERCC6	DNA excision repair protein ERCC-6	UL80.5, UL38, RL8A, UL9, ORFL147C
10730	YME1L1	ATP-dependent zinc metalloprotease YME1L1	UL16, UL40, US30
23195	MDN1	Midasin	UL75
2068	ERCC2	TFIIH basal transcription factor complex helicase XPD subunit	US9, UL20
25902	MTHFD1L	Monofunctional C1-tetrahydrofolate synthase, mitochondrial	ORFL147C, RL6
6683	SPAST	Spastin	US14
5347	PLK1	Serine/threonine-protein kinase PLK1	UL132
7048	TGFBR2	TGF-beta receptor type-2	UL20, UL140
23095	KIF1B	Kinesin-like protein KIF1B	US12, US14, UL43
7046	TGFBR1	TGF-beta receptor type-1	UL20
85441	HELZ2	Helicase with zinc finger domain 2	UL9, UL132, UL19, UL56, UL150A
55661	DDX27	Probable ATP-dependent RNA helicase DDX27	UL44
23113	CUL9	Cullin-9	US30
4233	MET	Hepatocyte growth factor receptor	UL20
23586	DDX58	Probable ATP-dependent RNA helicase DDX58	UL47, UL56, US9, US27
8428	STK24	Serine/threonine-protein kinase 24	US9
79834	PEAK1	Pseudopodium-enriched atypical kinase 1	UL94
2081	ERN1	Serine/threonine-protein kinase/endoribonuclease IRE1	US12
5156	PDGFRA	Platelet-derived growth factor receptor alpha	UL75, UL74, UL20, UL115, UL141, UL140, US7, UL123, UL132
699	BUB1	Mitotic checkpoint serine/threonine-protein kinase BUB1	UL20
7525	YES1	Tyrosine-protein kinase Yes	UL20
10212	DDX39A	ATP-dependent RNA helicase DDX39A	UL27, UL122, UL14
5566	PRKACA	cAMP-dependent protein kinase catalytic subunit alpha	UL14
22907	DHX30	Putative ATP-dependent RNA helicase DHX30	UL44
4621	MYH3	Myosin-3	US28
4620	MYH2	Myosin-2	US28
57680	CHD8	Chromodomain-helicase-DNA-binding protein 8	US12
4622	MYH4	Myosin-4	US28
4625	MYH7	Myosin-7	US28
10938	EHD1	EH domain-containing protein 1	ORFL147C
4624	MYH6	Myosin-6	US28
2185	PTK2B	Protein-tyrosine kinase 2-beta	UL24
81570	CLPB	Caseinolytic peptidase B protein homolog	UL23, UL40
9416	DDX23	Probable ATP-dependent RNA helicase DDX23	UL8
5894	RAF1	RAF proto-oncogene serine/threonine-protein kinase	UL132
2050	EPHB4	Ephrin type-B receptor 4	US14
6597	SMARCA4	Transcription activator BRG1	US26
26038	CHD5	Chromodomain-helicase-DNA-binding protein 5	UL29
55083	KIF26B	Kinesin-like protein KIF26B	UL116, UL123, UL150, UL75, US7
8467	SMARCA5	SWI/SNF-related matrix-associated actin-dependent regulator of chromatin subfamily A member 5	UL9, UL45
22929	SEPHS1	Selenide, water dikinase 1	US12
25865	PRKD2	Serine/threonine-protein kinase D2	UL105, US9, UL47
50488	MINK1	Misshapen-like kinase 1	ORFS343C, UL150A, UL55, UL56
51727	CMPK1	UMP-CMP kinase	RL6, UL56, US8, UL132, UL47, US12
55601	DDX60	Probable ATP-dependent RNA helicase DDX60	UL56, UL71
9493	KIF23	Kinesin-like protein KIF23	US26, UL20
23405	DICER1	Endoribonuclease Dicer	UL44
3192	HNRNPU	Heterogeneous nuclear ribonucleoprotein U	US22
701	BUB1B	Mitotic checkpoint serine/threonine-protein kinase BUB1 beta	US14
89797	NAV2	Neuron navigator 2	UL94
1770	DNAH9	Dynein heavy chain 9, axonemal	UL50
5585	PKN1	Serine/threonine-protein kinase N1	ORFL147C
439	ASNA1	ATPase ASNA1	RL8A
2064	ERBB2	Receptor tyrosine-protein kinase erbB-2	US13, US12, US21, US20
55794	DDX28	Probable ATP-dependent RNA helicase DDX28	UL36
2710	GK	Glycerol kinase	UL147A, UL16, UL40
5605	MAP2K2	Dual specificity mitogen-activated protein kinase kinase 2	UL14, RL6
10058	ABCB6	ATP-binding cassette sub-family B member 6, mitochondrial	UL148A, UL20
2260	FGFR1	Fibroblast growth factor receptor 1	UL20
6196	RPS6KA2	Ribosomal protein S6 kinase alpha-2	UL26
6197	RPS6KA3	Ribosomal protein S6 kinase alpha-3	UL26, UL25
445	ASS1	Argininosuccinate synthase	UL132, ORFL147C, UL150A, UL19, UL56, UL105, US9, UL55
283106	CSNK2A3	Casein kinase II subunit alpha 3	UL84
8780	RIOK3	Serine/threonine-protein kinase RIO3	UL40
9785	DHX38	Pre-mRNA-splicing factor ATP-dependent RNA helicase PRP16	UL2, US26, UL133
6195	RPS6KA1	Ribosomal protein S6 kinase alpha-1	UL26
9319	TRIP13	Pachytene checkpoint protein 2 homolog	US9, UL20
1956	EGFR	Epidermal growth factor receptor	US12, US13, UL8
2932	GSK3B	Glycogen synthase kinase-3 beta	US22, UL80.5, RL6
2931	GSK3A	Glycogen synthase kinase-3 alpha	UL80.5, US22
6793	STK10	Serine/threonine-protein kinase 10	UL13, US7
1025	CDK9	Cyclin-dependent kinase 9	UL40, UL94
1024	CDK8	Cyclin-dependent kinase 8	UL50
51347	TAOK3	Serine/threonine-protein kinase TAO3	US16
7083	TK1	Thymidine kinase, cytosolic	US9
7273	TTN	Titin	US28, UL55
3654	IRAK1	Interleukin-1 receptor-associated kinase 1	UL20, US9, UL19
659	BMPR2	Bone morphogenetic protein receptor type-2	US27
10845	CLPX	ATP-dependent Clp protease ATP-binding subunit clpX-like, mitochondrial	UL33
57644	MYH7B	Myosin-7B	US28
1158	CKM	Creatine kinase M-type	UL1, US28
4343	MOV10	Putative helicase MOV-10	UL6, UL19, UL44, UL9
1159	CKMT1A	Creatine kinase U-type, mitochondrial	UL56, US23, UL56
9525	VPS4B	Vacuolar protein sorting-associated protein 4B	US16, US14
1969	EPHA2	Ephrin type-A receptor 2	UL20
2043	EPHA4	Ephrin type-A receptor 4	UL78
7155	TOP2B	DNA topoisomerase 2-beta	UL9
7153	TOP2A	DNA topoisomerase 2-alpha	UL9, RL8A, UL20, UL30, UL86, RL6, UL150A, UL105, UL19, UL32
79877	DCAKD	Dephospho-CoA kinase domain-containing protein	UL148C
8476	CDC42BPA	Serine/threonine-protein kinase MRCK alpha	UL74
80347	COASY	Bifunctional coenzyme A synthase	US12, UL56
4288	MKI67	Proliferation marker protein Ki-67	UL9, US13, UL80.5, UL20, RL8A, UL32, UL86, UL150A, US27, RL6, UL105
27348	TOR1B	Torsin-1B	UL40, US3
10783	NEK6	Serine/threonine-protein kinase Nek6	UL94
4067	LYN	Tyrosine-protein kinase Lyn	UL20
4140	MARK3	MAP/microtubule affinity-regulating kinase 3	UL82
Histone deacetylase complex p=0.0477
9612	NCOR2	Nuclear receptor corepressor 2	UL29, US26, UL94, ORFS343C, UL150A, US9
9611	NCOR1	Nuclear receptor corepressor 1	UL29, US26, UL94, UL55
3094	HINT1	Histidine triad nucleotide-binding protein 1	RL6, UL47, UL132
9219	MTA2	Metastasis-associated protein MTA2	UL29
79718	TBL1XR1	F-box-like/WD repeat-containing protein TBL1XR1	UL29
6907	TBL1X	F-box-like/WD repeat-containing protein TBL1X	UL29, US26, UL94, UL150A, UL30
9734	HDAC9	Histone deacetylase 9	UL19
3065	HDAC1	Histone deacetylase 1	UL29
9759	HDAC4	Histone deacetylase 4	UL122
8841	HDAC3	Histone deacetylase 3	UL29, UL94, US26
8932	MBD2	Methyl-CpG-binding domain protein 2	UL29, UL38

## Sheet: Supplementary File 4B
Cell-cell adherens junction	Count	% interaction	% function		Mitochondrion	Count	% interaction	% function		Nucleotide-binding	Count	% interaction	% function		Transcription-coupled nucleotide-excision repair	Count	% interaction	% function		Ubl conjugation pathway	Count	% interaction	% function		mRNA splicing, via spliceosome	Count	% interaction	% function		domain:HECT	Count	% interaction	% function		CCR4-NOT complex	Count	% interaction	% function		RNA-binding	Count	% interaction	% function		NuRD complex	Count	% interaction	% function
UL43	3	0.333333	0.0375		UL53	1	1	0.00564972		UL89	1	1	0.00395257		RL1	2	0.666667	0.0625		UL145	3	1	0.0258621		UL98	1	1	0.0175439		UL42	5	0.555556	0.294118		UL72	11	0.578947	0.916667		UL112	1	0.5	0.00961538		UL29	10	0.4	0.833333
UL57	1	0.333333	0.0125		UL104	3	0.75	0.0169492		UL15A	1	0.5	0.00395257		UL87	11	0.647059	0.34375		RL1	3	1	0.0258621		UL87	11	0.647059	0.192982		US32	1	0.166667	0.0588235		UL56	1	0.00574713	0.0833333		UL44	21	0.308824	0.201923		UL38	6	0.272727	0.5
UL23	2	0.25	0.025		UL144	3	0.6	0.0169492		UL69	1	0.5	0.00395257		UL91	3	0.333333	0.09375		UL30A	2	0.666667	0.0172414		UL91	3	0.333333	0.0526316		UL55	5	0.142857	0.294118							UL72	5	0.263158	0.0480769		UL84	1	0.1	0.0833333
IRS1	3	0.25	0.0375		UL102	2	0.4	0.0112994		UL1	1	0.5	0.00395257		UL145	1	0.333333	0.03125		UL42	5	0.555556	0.0431034		UL22A	2	0.142857	0.0350877		UL36	1	0.125	0.0588235							UL21A	1	0.25	0.00961538		US18	1	0.1	0.0833333
UL25	1	0.25	0.0125		UL147A	4	0.363636	0.0225989		UL102	2	0.4	0.00790514		RL12	1	0.166667	0.03125		US34	1	0.5	0.00862069		US15	1	0.142857	0.0175439		UL18	1	0.125	0.0588235							US22	15	0.245902	0.144231		US14	1	0.0222222	0.0833333
UL97	1	0.25	0.0125		UL30A	1	0.333333	0.00564972		US28	12	0.352941	0.0474308		UL31	1	0.142857	0.03125		UL112	1	0.5	0.00862069		UL10	1	0.125	0.0175439		US30	4	0.105263	0.235294							UL6	2	0.2	0.0192308		US12	1	0.0166667	0.0833333
UL148D	2	0.222222	0.025		UL35	1	0.333333	0.00564972		UL70	12	0.352941	0.0474308		US15	1	0.142857	0.03125		UL102	2	0.4	0.0172414		UL95	1	0.111111	0.0175439		US34A	1	0.05	0.0588235							US33A	1	0.166667	0.00961538		UL8	1	0.0153846	0.0833333
UL2	3	0.157895	0.0375		UL84	3	0.3	0.0169492		UL35	1	0.333333	0.00395257		UL105	2	0.117647	0.0625		UL147	2	0.4	0.0172414		UL148D	1	0.111111	0.0175439		UL74	2	0.0384615	0.117647							UL77	1	0.166667	0.00961538		UL20	1	0.00740741	0.0833333
UL88	4	0.148148	0.05		UL40	19	0.292308	0.107345		UL115	1	0.333333	0.00395257		UL19	4	0.114286	0.125		UL36	3	0.375	0.0258621		UL72	2	0.105263	0.0350877		UL27	1	0.0384615	0.0588235							UL30	4	0.16	0.0384615		RL6	1	0.00680272	0.0833333
UL122	5	0.125	0.0625		UL22A	4	0.285714	0.0225989		UL84	3	0.3	0.0118577		UL95	1	0.111111	0.03125		US33A	2	0.333333	0.0172414		US26	9	0.0989011	0.157895		US14	1	0.0222222	0.0588235							UL9	9	0.142857	0.0865385
UL131A	1	0.125	0.0125		UL44	19	0.279412	0.107345		UL138	2	0.285714	0.00790514		UL148D	1	0.111111	0.03125		UL80	1	0.333333	0.00862069		UL133	1	0.0769231	0.0175439		UL80.5	1	0.0222222	0.0588235							UL71	3	0.142857	0.0288462
UL72	2	0.105263	0.025		UL135	7	0.269231	0.039548		RL9A	2	0.285714	0.00790514		UL83	1	0.0833333	0.03125		UL83	4	0.333333	0.0344828		US22	4	0.0655738	0.0701754		US26	2	0.021978	0.117647							ORFL147C	10	0.125	0.0961538
UL8	6	0.0923077	0.075		UL103	1	0.25	0.00564972		UL147A	3	0.272727	0.0118577		UL33	1	0.0769231	0.03125		UL35	1	0.333333	0.00862069		UL130	1	0.0625	0.0175439		UL26	1	0.0204082	0.0588235							UL10	1	0.125	0.00961538
UL56	16	0.091954	0.2		UL50	7	0.2	0.039548		UL103	1	0.25	0.00395257		RL8A	2	0.0714286	0.0625		US24	2	0.285714	0.0172414		UL8	4	0.0615385	0.0701754		UL16	1	0.0169492	0.0588235							ORFS343C	3	0.125	0.0288462
UL147A	1	0.0909091	0.0125		UL139	1	0.2	0.00564972		UL25	1	0.25	0.00395257		UL22A	1	0.0714286	0.03125		UL138	2	0.285714	0.0172414		UL26	3	0.0612245	0.0526316		US12	1	0.0166667	0.0588235							UL36	1	0.125	0.00961538
US13	2	0.0909091	0.025		UL24	1	0.2	0.00564972		UL131A	2	0.25	0.00790514		UL38	1	0.0454545	0.03125		IRS1	3	0.25	0.0258621		UL2	1	0.0526316	0.0175439		UL40	1	0.0153846	0.0588235							UL27	3	0.115385	0.0288462
US1	1	0.0909091	0.0125		UL148	1	0.2	0.00564972		UL21A	1	0.25	0.00395257		US14	2	0.0444444	0.0625		UL150	2	0.25	0.0172414		ORFL147C	4	0.05	0.0701754		US7	1	0.0126582	0.0588235							UL37	1	0.111111	0.00961538
UL50	3	0.0857143	0.0375		UL14	9	0.176471	0.0508475		UL13	3	0.230769	0.0118577		UL80.5	2	0.0444444	0.0625		UL104	1	0.25	0.00862069		RL6	7	0.047619	0.122807		UL20	1	0.00740741	0.0588235							UL148D	1	0.111111	0.00961538
UL32	1	0.0833333	0.0125		UL99	5	0.172414	0.0282486		US27	21	0.228261	0.083004		UL30	1	0.04	0.03125		UL21A	1	0.25	0.00862069		UL9	3	0.047619	0.0526316												UL2	2	0.105263	0.0192308
UL26	4	0.0816327	0.05		UL77	1	0.166667	0.00564972		UL14	11	0.215686	0.0434783		UL27	1	0.0384615	0.03125		US30	9	0.236842	0.0775862		UL44	3	0.0441176	0.0526316												US34A	2	0.1	0.0192308
US23	3	0.0769231	0.0375		UL86	5	0.166667	0.0282486		UL40	13	0.2	0.0513834		US19	1	0.0384615	0.03125		UL55	8	0.228571	0.0689655		UL30	1	0.04	0.0175439												UL83	1	0.0833333	0.00961538
US19	2	0.0769231	0.025		UL78	2	0.153846	0.0112994		UL19	7	0.2	0.027668		US12	2	0.0333333	0.0625		UL54	1	0.2	0.00862069		UL27	1	0.0384615	0.0175439												US16	1	0.0833333	0.00961538
UL27	2	0.0769231	0.025		UL33	2	0.153846	0.0112994		UL45	3	0.2	0.0118577		UL86	1	0.0333333	0.03125		UL114	1	0.2	0.00862069		UL99	1	0.0344828	0.0175439												UL26	4	0.0816327	0.0384615
UL78	1	0.0769231	0.0125		US34A	3	0.15	0.0169492		UL147	1	0.2	0.00395257		UL55	1	0.0285714	0.03125		UL139	1	0.2	0.00862069		US7	2	0.0253165	0.0350877												US26	7	0.0769231	0.0673077
UL33	1	0.0769231	0.0125		UL70	5	0.147059	0.0282486		US14	9	0.2	0.0355731		US7	2	0.0253165	0.0625		UL74	9	0.173077	0.0775862		UL122	1	0.025	0.0175439												UL99	2	0.0689655	0.0192308
UL141	1	0.0769231	0.0125		RL9A	1	0.142857	0.00564972		UL148	1	0.2	0.00395257		UL26	1	0.0204082	0.03125		US32	1	0.166667	0.00862069		US9	2	0.0227273	0.0350877												RL6	10	0.0680272	0.0961538
UL16	4	0.0677966	0.05		UL38	3	0.136364	0.0169492		UL139	1	0.2	0.00395257		UL132	2	0.0186916	0.0625		RL12	1	0.166667	0.00862069		UL80.5	1	0.0222222	0.0175439												UL45	1	0.0666667	0.00961538
US12	4	0.0666667	0.05		UL16	8	0.135593	0.0451977		UL75	5	0.2	0.0197628		UL9	1	0.015873	0.03125		UL27	4	0.153846	0.0344828		UL14	1	0.0196078	0.0175439												UL150A	3	0.0638298	0.0288462
UL45	1	0.0666667	0.0125		UL80.5	6	0.133333	0.0338983		UL24	1	0.2	0.00395257		UL8	1	0.0153846	0.03125		UL19	5	0.142857	0.0431034		UL94	1	0.0166667	0.0175439												UL87	1	0.0588235	0.00961538
UL70	2	0.0588235	0.025		UL45	2	0.133333	0.0112994		UL20	26	0.192593	0.102767		ORFL147C	1	0.0125	0.03125		UL140	3	0.136364	0.0258621		UL47	1	0.0140845	0.0175439												UL14	3	0.0588235	0.0288462
US34A	1	0.05	0.0125		UL82	2	0.133333	0.0112994		US12	11	0.183333	0.0434783		US9	1	0.0113636	0.03125		UL18	1	0.125	0.00862069		UL132	1	0.00934579	0.0175439												US9	5	0.0568182	0.0480769
RL6	7	0.047619	0.0875		UL122	5	0.125	0.0282486		US13	4	0.181818	0.0158103		US26	1	0.010989	0.03125		US20	1	0.125	0.00862069		UL56	1	0.00574713	0.0175439												UL122	2	0.05	0.0192308
US9	4	0.0454545	0.05		UL23	1	0.125	0.00564972		UL38	4	0.181818	0.0158103		UL20	1	0.00740741	0.03125		UL29	3	0.12	0.0258621																	UL8	3	0.0461538	0.0288462
UL140	1	0.0454545	0.0125		UL36	1	0.125	0.00564972		ORFS343C	4	0.166667	0.0158103		RL6	1	0.00680272	0.03125		UL80.5	5	0.111111	0.0431034																	US13	1	0.0454545	0.00961538
UL135	1	0.0384615	0.0125		RL6	18	0.122449	0.101695		UL77	1	0.166667	0.00395257							US18	1	0.1	0.00862069																	US14	2	0.0444444	0.0192308
UL148A	4	0.0338983	0.05		US8	4	0.121212	0.0225989		US16	2	0.166667	0.00790514							UL71	2	0.0952381	0.0172414																	UL47	3	0.0422535	0.0288462
UL94	2	0.0333333	0.025		UL27	3	0.115385	0.0169492		US21	4	0.16	0.0158103							UL38	2	0.0909091	0.0172414																	UL56	7	0.0402299	0.0673077
UL86	1	0.0333333	0.0125		UL47	8	0.112676	0.0451977		UL9	10	0.15873	0.0395257							US8	3	0.0909091	0.0258621																	US19	1	0.0384615	0.00961538
US8	1	0.030303	0.0125		UL43	1	0.111111	0.00564972		US30	6	0.157895	0.0237154							US1	1	0.0909091	0.00862069																	US7	3	0.0379747	0.0288462
UL55	1	0.0285714	0.0125		RL8A	3	0.107143	0.0169492		UL27	4	0.153846	0.0158103							UL94	5	0.0833333	0.0431034																	UL16	2	0.0338983	0.0192308
UL47	2	0.028169	0.025		US30	4	0.105263	0.0225989		UL16	9	0.152542	0.0355731							UL4	1	0.0833333	0.00862069																	UL86	1	0.0333333	0.00961538
US7	2	0.0253165	0.025		US23	4	0.102564	0.0225989		RL6	21	0.142857	0.083004							UL13	1	0.0769231	0.00862069																	UL50	1	0.0285714	0.00961538
ORFL147C	2	0.025	0.025		US12	6	0.1	0.0338983		UL22A	2	0.142857	0.00790514							US26	7	0.0769231	0.0603448																	UL19	1	0.0285714	0.00961538
UL100	1	0.0243902	0.0125		UL71	2	0.0952381	0.0112994		UL50	5	0.142857	0.0197628							UL78	1	0.0769231	0.00862069																	UL132	3	0.0280374	0.0288462
UL20	3	0.0222222	0.0375		ORFL147C	7	0.0875	0.039548		RL8A	4	0.142857	0.0158103							US19	2	0.0769231	0.0172414																	UL74	1	0.0192308	0.00961538
US14	1	0.0222222	0.0125		UL4	1	0.0833333	0.00564972		US15	1	0.142857	0.00395257							RL6	10	0.0680272	0.0862069																	UL94	1	0.0166667	0.00961538
UL80.5	1	0.0222222	0.0125		US21	2	0.08	0.0112994		UL94	8	0.133333	0.0316206							US14	3	0.0666667	0.0258621																	US12	1	0.0166667	0.00961538
US26	2	0.021978	0.025		UL74	4	0.0769231	0.0225989		UL23	1	0.125	0.00395257							US22	4	0.0655738	0.0344828																	US27	1	0.0108696	0.00961538
UL150A	1	0.0212766	0.0125		UL121	1	0.0769231	0.00564972		UL36	1	0.125	0.00395257							UL26	3	0.0612245	0.0258621
UL14	1	0.0196078	0.0125		UL88	2	0.0740741	0.0112994		UL150	1	0.125	0.00395257							UL70	2	0.0588235	0.0172414
UL132	2	0.0186916	0.025		UL148C	5	0.0735294	0.0282486		US20	1	0.125	0.00395257							US7	4	0.0506329	0.0344828
UL9	1	0.015873	0.0125		UL20	9	0.0666667	0.0508475		UL128	1	0.125	0.00395257							US34A	1	0.05	0.00862069
UL44	1	0.0147059	0.0125		US14	3	0.0666667	0.0169492		UL132	13	0.121495	0.0513834							US12	3	0.05	0.0258621
US27	1	0.0108696	0.0125		US22	4	0.0655738	0.0225989		US8	4	0.121212	0.0158103							ORFL147C	4	0.05	0.0344828
					UL56	11	0.0632184	0.0621469		UL30	3	0.12	0.0118577							UL132	5	0.046729	0.0431034
					UL8	4	0.0615385	0.0225989		UL29	3	0.12	0.0118577							UL150A	2	0.0425532	0.0172414
					UL26	3	0.0612245	0.0169492		UL135	3	0.115385	0.0118577							UL47	3	0.0422535	0.0258621
					US7	4	0.0506329	0.0225989		UL74	6	0.115385	0.0237154							ORFS343C	1	0.0416667	0.00862069
					UL140	1	0.0454545	0.00564972		US9	10	0.113636	0.0395257							UL56	7	0.0402299	0.0603448
					UL148A	5	0.0423729	0.0282486		UL148D	1	0.111111	0.00395257							UL30	1	0.04	0.00862069
					ORFS343C	1	0.0416667	0.00564972		UL80.5	5	0.111111	0.0197628							UL135	1	0.0384615	0.00862069
					UL29	1	0.04	0.00564972		UL42	1	0.111111	0.00395257							UL20	5	0.037037	0.0431034
					US9	3	0.0340909	0.0169492		UL43	1	0.111111	0.00395257							UL16	2	0.0338983	0.0172414
					UL94	2	0.0333333	0.0112994		US3	1	0.111111	0.00395257							UL86	1	0.0333333	0.00862069
					UL19	1	0.0285714	0.00564972		UL8	7	0.107692	0.027668							UL8	2	0.0307692	0.0172414
					UL55	1	0.0285714	0.00564972		UL148C	7	0.102941	0.027668							UL148C	2	0.0294118	0.0172414
					UL132	3	0.0280374	0.0169492		UL6	1	0.1	0.00395257							US23	1	0.025641	0.00862069
					UL9	1	0.015873	0.00564972		UL86	3	0.1	0.0118577							UL148A	3	0.0254237	0.0258621
					US26	1	0.010989	0.00564972		US18	1	0.1	0.00395257							UL14	1	0.0196078	0.00862069
					US27	1	0.0108696	0.00564972		UL116	1	0.1	0.00395257							UL9	1	0.015873	0.00862069
										UL47	7	0.0985915	0.027668							UL40	1	0.0153846	0.00862069
										US22	6	0.0983607	0.0237154							US9	1	0.0113636	0.00862069
										UL100	4	0.097561	0.0158103
										UL140	2	0.0909091	0.00790514
										UL44	6	0.0882353	0.0237154
										UL56	15	0.0862069	0.0592885
										UL55	3	0.0857143	0.0118577
										UL83	1	0.0833333	0.00395257
										UL4	1	0.0833333	0.00395257
										UL32	1	0.0833333	0.00395257
										US23	3	0.0769231	0.0118577
										UL33	1	0.0769231	0.00395257
										UL121	1	0.0769231	0.00395257
										UL133	1	0.0769231	0.00395257
										UL78	1	0.0769231	0.00395257
										US7	6	0.0759494	0.0237154
										ORFL147C	6	0.075	0.0237154
										UL99	2	0.0689655	0.00790514
										UL82	1	0.0666667	0.00395257
										UL150A	3	0.0638298	0.0118577
										UL130	1	0.0625	0.00395257
										UL26	3	0.0612245	0.0118577
										UL105	1	0.0588235	0.00395257
										US26	5	0.0549451	0.0197628
										UL2	1	0.0526316	0.00395257
										UL71	1	0.047619	0.00395257
										UL148A	5	0.0423729	0.0197628
										UL123	1	0.037037	0.00395257
										UL122	1	0.025	0.00395257
[truncated: 124 more columns]

## Sheet: Supplementary File 4C
TP class enriched	Term and associated Entrez Gene IDs	Gene Name	Description	Interacting baits from relevant TP class
TP1
	SANT p=0.0444
	9612	NCOR2	nuclear receptor corepressor 2(NCOR2)	UL29
	57504	MTA3	metastasis associated 1 family member 3(MTA3)	UL29
	9611	NCOR1	nuclear receptor corepressor 1(NCOR1)	UL29
	9219	MTA2	metastasis associated 1 family member 2(MTA2)	UL29
	9112	MTA1	metastasis associated 1(MTA1)	UL29
	Histone deacetylase activity p=0.00121
	3065	HDAC1	histone deacetylase 1(HDAC1)	UL29
	1107	CHD3	chromodomain helicase DNA binding protein 3(CHD3)	UL29
	57504	MTA3	metastasis associated 1 family member 3(MTA3)	UL29
	9219	MTA2	metastasis associated 1 family member 2(MTA2)	UL29
	1108	CHD4	chromodomain helicase DNA binding protein 4(CHD4)	UL29
	8841	HDAC3	histone deacetylase 3(HDAC3)	UL29
	5931	RBBP7	RB binding protein 7, chromatin remodeling factor(RBBP7)	UL29
	9112	MTA1	metastasis associated 1(MTA1)	UL29
	53615	MBD3	methyl-CpG binding domain protein 3(MBD3)	UL29
	Histone deacetylase complex p=0.000568
	3065	HDAC1	histone deacetylase 1(HDAC1)	UL29
	8932	MBD2	methyl-CpG binding domain protein 2(MBD2)	UL29
	9612	NCOR2	nuclear receptor corepressor 2(NCOR2)	UL29
	9611	NCOR1	nuclear receptor corepressor 1(NCOR1)	UL29
	79718	TBL1XR1	transducin beta like 1 X-linked receptor 1(TBL1XR1)	UL29
	9219	MTA2	metastasis associated 1 family member 2(MTA2)	UL29
	8841	HDAC3	histone deacetylase 3(HDAC3)	UL29
	6907	TBL1X	transducin beta like 1X-linked(TBL1X)	UL29
	NuRD complex p=0.00000486
	3065	HDAC1	histone deacetylase 1(HDAC1)	UL29
	1107	CHD3	chromodomain helicase DNA binding protein 3(CHD3)	UL29
	26038	CHD5	chromodomain helicase DNA binding protein 5(CHD5)	UL29
	57504	MTA3	metastasis associated 1 family member 3(MTA3)	UL29
	9219	MTA2	metastasis associated 1 family member 2(MTA2)	UL29
	1108	CHD4	chromodomain helicase DNA binding protein 4(CHD4)	UL29
	5931	RBBP7	RB binding protein 7, chromatin remodeling factor(RBBP7)	UL29
	54815	GATAD2A	GATA zinc finger domain containing 2A(GATAD2A)	UL29
	57459	GATAD2B	GATA zinc finger domain containing 2B(GATAD2B)	UL29
	53615	MBD3	methyl-CpG binding domain protein 3(MBD3)	UL29
TP2	IGc1 p=0.00843
	3502	IGHG3	immunoglobulin heavy constant gamma 3 (G3m marker)(IGHG3)	US20
	3514	IGKC	immunoglobulin kappa constant(IGKC)	US20
	3107	HLA-C	major histocompatibility complex, class I, C(HLA-C)	US10
	3500	IGHG1	immunoglobulin heavy constant gamma 1 (G1m marker)(IGHG1)	US20
	374383	NCR3LG1	natural killer cell cytotoxicity receptor 3 ligand 1(NCR3LG1)	US15
	100507436	MICA	MHC class I polypeptide-related sequence A(MICA)	US12
	4277	MICB	MHC class I polypeptide-related sequence B(MICB)	US12
	NuRD complex p=0.00000518
	5928	RBBP4	RB binding protein 4, chromatin remodeling factor(RBBP4)	US12
	1107	CHD3	chromodomain helicase DNA binding protein 3(CHD3)	UL38
	57504	MTA3	metastasis associated 1 family member 3(MTA3)	UL38
	1108	CHD4	chromodomain helicase DNA binding protein 4(CHD4)	UL38
	5931	RBBP7	RB binding protein 7, chromatin remodeling factor(RBBP7)	UL38
	54815	GATAD2A	GATA zinc finger domain containing 2A(GATAD2A)	UL38
	53615	MBD3	methyl-CpG binding domain protein 3(MBD3)	UL38
TP3	Blood coagulation p=0.0319
	3273	HRG	histidine rich glycoprotein(HRG)	UL56
	2243	FGA	fibrinogen alpha chain(FGA)	UL56
	2266	FGG	fibrinogen gamma chain(FGG)	UL56
	728113	ANXA8L1	annexin A8-like 1(ANXA8L1)	UL56
	2244	FGB	fibrinogen beta chain(FGB)	UL56
	5265	SERPINA1	serpin family A member 1(SERPINA1)	UL15A, UL56
	5340	PLG	plasminogen(PLG)	UL56
	Cell division p=0.0299
	64151	NCAPG	non-SMC condensin I complex subunit G(NCAPG)	UL16
	55844	PPP2R2D	protein phosphatase 2 regulatory subunit Bdelta(PPP2R2D)	UL71
	54820	NDE1	nudE neurodevelopment protein 1(NDE1)	US26
	9525	VPS4B	vacuolar protein sorting 4 homolog B(VPS4B)	US14
	23172	FAM175B	family with sequence similarity 175 member B(FAM175B)	US26
	23244	PDS5A	PDS5 cohesin associated factor A(PDS5A)	UL16
	51530	ZC3HC1	zinc finger C3HC-type containing 1(ZC3HC1)	UL71
	8812	CCNK	cyclin K(CCNK)	UL150A
	8914	TIMELESS	timeless circadian clock(TIMELESS)	UL16
	83858	ATAD3B	ATPase family, AAA domain containing 3B(ATAD3B)	US22
	1452	CSNK1A1	casein kinase 1 alpha 1(CSNK1A1)	UL56
	701	BUB1B	BUB1 mitotic checkpoint serine/threonine kinase B(BUB1B)	US14
	9493	KIF23	kinesin family member 23(KIF23)	US26
	157313	CDCA2	cell division cycle associated 2(CDCA2)	US26
	29127	RACGAP1	Rac GTPase activating protein 1(RACGAP1)	US26
	9918	NCAPD2	non-SMC condensin I complex subunit D2(NCAPD2)	US26
	6683	SPAST	spastin(SPAST)	UL150A
	23310	NCAPD3	non-SMC condensin II complex subunit D3(NCAPD3)	UL16
	79184	BRCC3	BRCA1/BRCA2-containing complex subunit 3(BRCC3)	US26
	29086	BABAM1	BRISC and BRCA1 A complex member 1(BABAM1)	US26
	2908	NR3C1	nuclear receptor subfamily 3 group C member 1(NR3C1)	UL16
	311	ANXA11	annexin A11(ANXA11)	US22
	5289	PIK3C3	phosphatidylinositol 3-kinase catalytic subunit type 3(PIK3C3)	UL16
	Thioester bond p=0.0259
	144568	A2ML1	alpha-2-macroglobulin like 1(A2ML1)	UL56
	718	C3	complement C3(C3)	UL56
	2	A2M	alpha-2-macroglobulin(A2M)	UL56
	100293534	C4B_2	complement component 4B (Chido blood group), copy 2(C4B_2)	UL56
	Innate immunity p=0.0252
	2243	FGA	fibrinogen alpha chain(FGA)	UL56
	3934	LCN2	lipocalin 2(LCN2)	UL56, UL150A
	301	ANXA1	annexin A1(ANXA1)	UL56
	2244	FGB	fibrinogen beta chain(FGB)	UL56
	714	C1QC	complement C1q C chain(C1QC)	UL56
	10270	AKAP8	A-kinase anchoring protein 8(AKAP8)	US22
	29108	PYCARD	PYD and CARD domain containing(PYCARD)	UL56
	26525	IL36RN	interleukin 36 receptor antagonist(IL36RN)	UL56
	56300	IL36G	interleukin 36, gamma(IL36G)	UL56
	27179	IL36A	interleukin 36, alpha(IL36A)	UL56
	629	CFB	complement factor B(CFB)	UL56
	4599	MX1	MX dynamin like GTPase 1(MX1)	UL56
	24138	IFIT5	interferon induced protein with tetratricopeptide repeats 5(IFIT5)	UL71
	23586	DDX58	DExD/H-box helicase 58(DDX58)	UL56
	8638	OASL	2'-5'-oligoadenylate synthetase like(OASL)	UL56, UL71
	55601	DDX60	DExD/H-box helicase 60(DDX60)	UL56, UL71
	718	C3	complement C3(C3)	UL56
	100293534	C4B_2	complement component 4B (Chido blood group), copy 2(C4B_2)	UL56
	Protease inhibitor p=0.0179
	1294	COL7A1	collagen type VII alpha 1 chain(COL7A1)	UL150A
	1476	CSTB	cystatin B(CSTB)	UL56
	1992	SERPINB1	serpin family B member 1(SERPINB1)	UL56
	3700	ITIH4	inter-alpha-trypsin inhibitor heavy chain family member 4(ITIH4)	UL56
	5055	SERPINB2	serpin family B member 2(SERPINB2)	UL56
	8710	SERPINB7	serpin family B member 7(SERPINB7)	UL56, US8
	5265	SERPINA1	serpin family A member 1(SERPINA1)	UL15A, UL56
	1469	CST1	cystatin SN(CST1)	US6, US8
	144568	A2ML1	alpha-2-macroglobulin like 1(A2ML1)	UL56
	1472	CST4	cystatin S(CST4)	US6, US8
	2	A2M	alpha-2-macroglobulin(A2M)	UL56
	5275	SERPINB13	serpin family B member 13(SERPINB13)	UL56
	Metal-binding p=0.0177
	57472	CNOT6	CCR4-NOT transcription complex subunit 6(CNOT6)	UL72
	3273	HRG	histidine rich glycoprotein(HRG)	UL56
	123745	PLA2G4E	phospholipase A2 group IVE(PLA2G4E)	UL56
	115	ADCY9	adenylate cyclase 9(ADCY9)	US8
	1830	DSG3	desmoglein 3(DSG3)	UL56
	55288	RHOT1	ras homolog family member T1(RHOT1)	UL40
	51776	ZAK	sterile alpha motif and leucine zipper containing kinase AZK(ZAK)	US26
	10569	SLU7	SLU7 homolog, splicing factor(SLU7)	US26
	51251	NT5C3A	5'-nucleotidase, cytosolic IIIA(NT5C3A)	US26
	3162	HMOX1	heme oxygenase 1(HMOX1)	UL56
	196441	ZFC3H1	zinc finger C3H1-type containing(ZFC3H1)	US26
	2224	FDPS	farnesyl diphosphate synthase(FDPS)	UL16
	9054	NFS1	NFS1, cysteine desulfurase(NFS1)	US14
	29883	CNOT7	CCR4-NOT transcription complex subunit 7(CNOT7)	UL72
	51366	UBR5	ubiquitin protein ligase E3 component n-recognin 5(UBR5)	US26
	23049	SMG1	SMG1, nonsense mediated mRNA decay associated PI3K related kinase(SMG1)	UL16
	54487	DGCR8	DGCR8, microprocessor complex subunit(DGCR8)	US22
	3339	HSPG2	heparan sulfate proteoglycan 2(HSPG2)	UL40
	301	ANXA1	annexin A1(ANXA1)	UL56
	57553	MICAL3	microtubule associated monooxygenase, calponin and LIM domain containing 3(MICAL3)	US22, US26
	8703	B4GALT3	beta-1,4-galactosyltransferase 3(B4GALT3)	US14
	4008	LMO7	LIM domain 7(LMO7)	US26
	23429	RYBP	RING1 and YY1 binding protein(RYBP)	US22
	85441	HELZ2	helicase with zinc finger 2(HELZ2)	UL150A, UL56
	54439	RBM27	RNA binding motif protein 27(RBM27)	US26
	51530	ZC3HC1	zinc finger C3HC-type containing 1(ZC3HC1)	UL71
	390928	ACP7	acid phosphatase 7, tartrate resistant (putative)(ACP7)	UL56
	23650	TRIM29	tripartite motif containing 29(TRIM29)	UL56
	11219	TREX2	three prime repair exonuclease 2(TREX2)	UL56
	55596	ZCCHC8	zinc finger CCHC-type containing 8(ZCCHC8)	US26
	80267	EDEM3	ER degradation enhancing alpha-mannosidase like protein 3(EDEM3)	UL16, US14
	23293	SMG6	SMG6, nonsense mediated mRNA decay factor(SMG6)	US26
	10691	GMEB1	glucocorticoid modulatory element binding protein 1(GMEB1)	UL150A
	9337	CNOT8	CCR4-NOT transcription complex subunit 8(CNOT8)	UL72
	5167	ENPP1	ectonucleotide pyrophosphatase/phosphodiesterase 1(ENPP1)	US14, UL71
	29127	RACGAP1	Rac GTPase activating protein 1(RACGAP1)	US26
	9314	KLF4	Kruppel like factor 4(KLF4)	US22, US26
	1012	CDH13	cadherin 13(CDH13)	UL34
	7739	ZNF185	zinc finger protein 185 (LIM domain)(ZNF185)	UL56
	84171	LOXL4	lysyl oxidase like 4(LOXL4)	UL40
	80204	FBXO11	F-box protein 11(FBXO11)	UL80
	23586	DDX58	DExD/H-box helicase 58(DDX58)	UL56
	6670	SP3	Sp3 transcription factor(SP3)	US22
	3936	LCP1	lymphocyte cytosolic protein 1(LCP1)	UL56
	9647	PPM1F	protein phosphatase, Mg2+/Mn2+ dependent 1F(PPM1F)	US14
	79724	ZNF768	zinc finger protein 768(ZNF768)	US22
	7153	TOP2A	topoisomerase (DNA) II alpha(TOP2A)	UL105, UL150A
	79759	ZNF668	zinc finger protein 668(ZNF668)	US26
	10270	AKAP8	A-kinase anchoring protein 8(AKAP8)	US22
	1387	CREBBP	CREB binding protein(CREBBP)	UL150A
	4843	NOS2	nitric oxide synthase 2(NOS2)	UL56
	29937	NENF	neudesin neurotrophic factor(NENF)	US26
	79184	BRCC3	BRCA1/BRCA2-containing complex subunit 3(BRCC3)	US26
	3673	ITGA2	integrin subunit alpha 2(ITGA2)	UL71
	10905	MAN1A2	mannosidase alpha class 1A member 2(MAN1A2)	US8
	6672	SP100	SP100 nuclear antigen(SP100)	UL56
	23598	PATZ1	POZ/BTB and AT hook containing zinc finger 1(PATZ1)	US22
	338324	S100A7A	S100 calcium binding protein A7A(S100A7A)	UL56
	6117	RPA1	replication protein A1(RPA1)	UL105
	2243	FGA	fibrinogen alpha chain(FGA)	UL56
	83475	DOHH	deoxyhypusine hydroxylase/monooxygenase(DOHH)	UL56
	50807	ASAP1	ArfGAP with SH3 domain, ankyrin repeat and PH domain 1(ASAP1)	UL105, UL150A, UL56
	113026	PLCD3	phospholipase C delta 3(PLCD3)	US26
	284695	ZNF326	zinc finger protein 326(ZNF326)	US22
	116988	AGAP3	ArfGAP with GTPase domain, ankyrin repeat and PH domain 3(AGAP3)	UL69
	79670	ZCCHC6	zinc finger CCHC-type containing 6(ZCCHC6)	US26
	54205	CYCS	cytochrome c, somatic(CYCS)	UL56
	11261	CHP1	calcineurin like EF-hand protein 1(CHP1)	UL40
	92822	ZNF276	zinc finger protein 276(ZNF276)	US26
	4313	MMP2	matrix metallopeptidase 2(MMP2)	UL40
	49855	SCAPER	S-phase cyclin A associated protein in the ER(SCAPER)	US26
	85377	MICALL1	MICAL like 1(MICALL1)	UL23
	3045	HBD	hemoglobin subunit delta(HBD)	UL56
	8681	JMJD7-PLA2G4B	JMJD7-PLA2G4B readthrough(JMJD7-PLA2G4B)	UL56
	8780	RIOK3	RIO kinase 3(RIOK3)	UL40
	6015	RING1	ring finger protein 1(RING1)	US22
	6667	SP1	Sp1 transcription factor(SP1)	US22
	6273	S100A2	S100 calcium binding protein A2(S100A2)	UL56
	22803	XRN2	5'-3' exoribonuclease 2(XRN2)	US26
	125	ADH1B	alcohol dehydrogenase 1B (class I), beta polypeptide(ADH1B)	US14
	5558	PRIM2	primase (DNA) subunit 2(PRIM2)	UL150A
	55432	YOD1	YOD1 deubiquitinase(YOD1)	UL56
	10138	YAF2	YY1 associated factor 2(YAF2)	US22
	126208	ZNF787	zinc finger protein 787(ZNF787)	US22
	84290	CAPNS2	calpain small subunit 2(CAPNS2)	UL56
	999	CDH1	cadherin 1(CDH1)	UL97
	810	CALML3	calmodulin like 3(CALML3)	UL56
	57505	AARS2	alanyl-tRNA synthetase 2, mitochondrial(AARS2)	UL16
	728113	ANXA8L1	annexin A8-like 1(ANXA8L1)	UL56
	23528	ZNF281	zinc finger protein 281(ZNF281)	UL103
	55616	ASAP3	ArfGAP with SH3 domain, ankyrin repeat and PH domain 3(ASAP3)	US26
	341208	HEPHL1	hephaestin like 1(HEPHL1)	UL56
	2266	FGG	fibrinogen gamma chain(FGG)	UL56
	7018	TF	transferrin(TF)	UL56
	759	CA1	carbonic anhydrase 1(CA1)	UL56
	1824	DSC2	desmocollin 2(DSC2)	UL56
	9917	FAM20B	FAM20B, glycosaminoglycan xylosylkinase(FAM20B)	US14
	3047	HBG1	hemoglobin subunit gamma 1(HBG1)	UL56
	55644	OSGEP	O-sialoglycoprotein endopeptidase(OSGEP)	UL40
	3416	IDE	insulin degrading enzyme(IDE)	UL15A
	29957	SLC25A24	solute carrier family 25 member 24(SLC25A24)	UL40
	23469	PHF3	PHD finger protein 3(PHF3)	US26
	55276	PGM2	phosphoglucomutase 2(PGM2)	UL56
	126410	CYP4F22	cytochrome P450 family 4 subfamily F member 22(CYP4F22)	UL56
	51341	ZBTB7A	zinc finger and BTB domain containing 7A(ZBTB7A)	US26
	25865	PRKD2	protein kinase D2(PRKD2)	UL105
	10539	GLRX3	glutaredoxin 3(GLRX3)	UL56, US8
	11278	KLF12	Kruppel like factor 12(KLF12)	US26
	283748	PLA2G4D	phospholipase A2 group IVD(PLA2G4D)	UL56
	9411	ARHGAP29	Rho GTPase activating protein 29(ARHGAP29)	UL150A, UL16
	10730	YME1L1	YME1 like 1 ATPase(YME1L1)	UL16, UL40
	64397	ZNF106	zinc finger protein 106(ZNF106)	US26
	26993	AKAP8L	A-kinase anchoring protein 8 like(AKAP8L)	US22
	8526	DGKE	diacylglycerol kinase epsilon(DGKE)	US14
	3043	HBB	hemoglobin subunit beta(HBB)	UL56
	4353	MPO	myeloperoxidase(MPO)	UL150A
	7538	ZFP36	ZFP36 ring finger protein(ZFP36)	UL56
	10193	RNF41	ring finger protein 41(RNF41)	US26
	1356	CP	ceruloplasmin(CP)	UL56
	10616	RBCK1	RANBP2-type and C3HC4-type zinc finger containing 1(RBCK1)	US14
	246175	CNOT6L	CCR4-NOT transcription complex subunit 6 like(CNOT6L)	UL72
	7536	SF1	splicing factor 1(SF1)	US26
	4017	LOXL2	lysyl oxidase like 2(LOXL2)	UL40
	7337	UBE3A	ubiquitin protein ligase E3A(UBE3A)	UL40
	79180	EFHD2	EF-hand domain family member D2(EFHD2)	UL56
	667	DST	dystonin(DST)	UL150A
	9169	SCAF11	SR-related CTD associated factor 11(SCAF11)	US26
	5531	PPP4C	protein phosphatase 4 catalytic subunit(PPP4C)	UL34
	10346	TRIM22	tripartite motif containing 22(TRIM22)	UL71
	79068	FTO	FTO, alpha-ketoglutarate dependent dioxygenase(FTO)	US8
	23304	UBR2	ubiquitin protein ligase E3 component n-recognin 2(UBR2)	US8
	197131	UBR1	ubiquitin protein ligase E3 component n-recognin 1(UBR1)	UL16
	2908	NR3C1	nuclear receptor subfamily 3 group C member 1(NR3C1)	UL16
	51274	KLF3	Kruppel like factor 3(KLF3)	US26
	64943	NT5DC2	5'-nucleotidase domain containing 2(NT5DC2)	US14
	57215	THAP11	THAP domain containing 11(THAP11)	US22
	RNA phosphodiester bond hydrolysis, exonucleolytic p=0.0165
	57472	CNOT6	CCR4-NOT transcription complex subunit 6(CNOT6)	UL72
	23019	CNOT1	CCR4-NOT transcription complex subunit 1(CNOT1)	UL72
	22803	XRN2	5'-3' exoribonuclease 2(XRN2)	US26
	29883	CNOT7	CCR4-NOT transcription complex subunit 7(CNOT7)	UL72
	25996	REXO2	RNA exonuclease 2(REXO2)	US8
	4848	CNOT2	CCR4-NOT transcription complex subunit 2(CNOT2)	UL72
	246175	CNOT6L	CCR4-NOT transcription complex subunit 6 like(CNOT6L)	UL72
	9337	CNOT8	CCR4-NOT transcription complex subunit 8(CNOT8)	UL72
	NK cell lectin-like receptor binding p=0.0145
	80328	ULBP2	UL16 binding protein 2(ULBP2)	UL16
	100507436	MICA	MHC class I polypeptide-related sequence A(MICA)	US14
	353091	RAET1G	retinoic acid early transcript 1G(RAET1G)	UL16
	3133	HLA-E	major histocompatibility complex, class I, E(HLA-E)	US8, UL40
	4277	MICB	MHC class I polypeptide-related sequence B(MICB)	UL16
	Armadillo-like helical p=0.00869
	64374	SIL1	SIL1 nucleotide exchange factor(SIL1)	UL40
	64151	NCAPG	non-SMC condensin I complex subunit G(NCAPG)	UL16
	11187	PKP3	plakophilin 3(PKP3)	UL56
	285527	FRYL	FRY like transcription coactivator(FRYL)	UL16
	6904	TBCD	tubulin folding cofactor D(TBCD)	UL16
	83475	DOHH	deoxyhypusine hydroxylase/monooxygenase(DOHH)	UL56
	23244	PDS5A	PDS5 cohesin associated factor A(PDS5A)	UL16
	30000	TNPO2	transportin 2(TNPO2)	UL16
	7249	TSC2	tuberous sclerosis 2(TSC2)	UL16
	63916	ELMO2	engulfment and cell motility 2(ELMO2)	UL16
	9918	NCAPD2	non-SMC condensin I complex subunit D2(NCAPD2)	UL150A
	23310	NCAPD3	non-SMC condensin II complex subunit D3(NCAPD3)	UL16
	545	ATR	ATR serine/threonine kinase(ATR)	UL16
	51719	CAB39	calcium binding protein 39(CAB39)	UL56
	26958	COPG2	coatomer protein complex subunit gamma 2(COPG2)	UL16
	55671	PPP4R3A	protein phosphatase 4 regulatory subunit 3A(PPP4R3A)	UL34
	9125	CNOT9	CCR4-NOT transcription complex subunit 9(CNOT9)	UL72
	727957	MROH1	maestro heat like repeat family member 1(MROH1)	UL16
	23223	RRP12	ribosomal RNA processing 12 homolog(RRP12)	UL150A
	23049	SMG1	SMG1, nonsense mediated mRNA decay associated PI3K related kinase(SMG1)	UL16
	92105	INTS4	integrator complex subunit 4(INTS4)	UL16
	57650	KIAA1524	KIAA1524(KIAA1524)	UL16
	CCR4-NOT core complex p=0.00609
	4849	CNOT3	CCR4-NOT transcription complex subunit 3(CNOT3)	UL72
	23019	CNOT1	CCR4-NOT transcription complex subunit 1(CNOT1)	UL72
	4848	CNOT2	CCR4-NOT transcription complex subunit 2(CNOT2)	UL72
	9125	CNOT9	CCR4-NOT transcription complex subunit 9(CNOT9)	UL72
	RNA-binding p=0.00151
	389677	RBM12B	RNA binding motif protein 12B(RBM12B)	US22
	57472	CNOT6	CCR4-NOT transcription complex subunit 6(CNOT6)	UL72
	3609	ILF3	interleukin enhancer binding factor 3(ILF3)	UL150A
	10179	RBM7	RNA binding motif protein 7(RBM7)	US22, US26
	79811	SLTM	SAFB like transcription modulator(SLTM)	US22, US26
	22794	CASC3	cancer susceptibility candidate 3(CASC3)	US26
	55695	NSUN5	NOP2/Sun RNA methyltransferase family member 5(NSUN5)	US22
	51663	ZFR	zinc finger RNA binding protein(ZFR)	UL150A
	100526737	RBM14-RBM4	RBM14-RBM4 readthrough(RBM14-RBM4)	US22
	7538	ZFP36	ZFP36 ring finger protein(ZFP36)	UL56
	57505	AARS2	alanyl-tRNA synthetase 2, mitochondrial(AARS2)	UL16
	6294	SAFB	scaffold attachment factor B(SAFB)	US22
	7884	SLBP	stem-loop binding protein(SLBP)	US26
	440275	EIF2AK4	eukaryotic translation initiation factor 2 alpha kinase 4(EIF2AK4)	UL150A
	29883	CNOT7	CCR4-NOT transcription complex subunit 7(CNOT7)	UL72
	64783	RBM15	RNA binding motif protein 15(RBM15)	US22
	5036	PA2G4	proliferation-associated 2G4(PA2G4)	UL56
	54487	DGCR8	DGCR8, microprocessor complex subunit(DGCR8)	US22
	10180	RBM6	RNA binding motif protein 6(RBM6)	US22, US26
	3192	HNRNPU	heterogeneous nuclear ribonucleoprotein U(HNRNPU)	US22
	7536	SF1	splicing factor 1(SF1)	US26
	55601	DDX60	DExD/H-box helicase 60(DDX60)	UL56, UL71
	29890	RBM15B	RNA binding motif protein 15B(RBM15B)	US22
	58517	RBM25	RNA binding motif protein 25(RBM25)	US14
	54439	RBM27	RNA binding motif protein 27(RBM27)	US26
	9667	SAFB2	scaffold attachment factor B2(SAFB2)	US22
	27288	RBMXL2	RNA binding motif protein, X-linked like 2(RBMXL2)	US22
	23589	CARHSP1	calcium regulated heat stable protein 1(CARHSP1)	UL56
	55599	RNPC3	RNA binding region (RNP1, RRM) containing 3(RNPC3)	UL72
	125950	RAVER1	ribonucleoprotein, PTB binding 1(RAVER1)	UL72
	9337	CNOT8	CCR4-NOT transcription complex subunit 8(CNOT8)	UL72
	2908	NR3C1	nuclear receptor subfamily 3 group C member 1(NR3C1)	UL16
	24138	IFIT5	interferon induced protein with tetratricopeptide repeats 5(IFIT5)	UL71
	22913	RALY	RALY heterogeneous nuclear ribonucleoprotein(RALY)	UL56
	23586	DDX58	DExD/H-box helicase 58(DDX58)	UL56
	8638	OASL	2'-5'-oligoadenylate synthetase like(OASL)	UL56, UL71
	494115	RBMXL1	RNA binding motif protein, X-linked like 1(RBMXL1)	US22
	27257	LSM1	LSM1 homolog, mRNA degradation associated(LSM1)	US14
	27316	RBMX	RNA binding motif protein, X-linked(RBMX)	US22
	DNA repair p=0.00143
	6117	RPA1	replication protein A1(RPA1)	UL105
	56946	EMSY	EMSY, BRCA2 interacting transcriptional repressor(EMSY)	US22
	2072	ERCC4	ERCC excision repair 4, endonuclease catalytic subunit(ERCC4)	US26
	7334	UBE2N	ubiquitin conjugating enzyme E2 N(UBE2N)	UL56
	11219	TREX2	three prime repair exonuclease 2(TREX2)	UL56
	55611	OTUB1	OTU deubiquitinase, ubiquitin aldehyde binding 1(OTUB1)	UL56
	9656	MDC1	mediator of DNA damage checkpoint 1(MDC1)	UL150A
	1025	CDK9	cyclin dependent kinase 9(CDK9)	UL40
	6118	RPA2	replication protein A2(RPA2)	US14, UL105
	84464	SLX4	SLX4 structure-specific endonuclease subunit(SLX4)	US26
	84126	ATRIP	ATR interacting protein(ATRIP)	UL16
	79068	FTO	FTO, alpha-ketoglutarate dependent dioxygenase(FTO)	US8
	9907	AP5Z1	adaptor related protein complex 5 zeta 1 subunit(AP5Z1)	UL16
	83666	PARP9	poly(ADP-ribose) polymerase family member 9(PARP9)	UL150A
	79184	BRCC3	BRCA1/BRCA2-containing complex subunit 3(BRCC3)	US26
	8450	CUL4B	cullin 4B(CUL4B)	RL1
	545	ATR	ATR serine/threonine kinase(ATR)	UL16
	29086	BABAM1	BRISC and BRCA1 A complex member 1(BABAM1)	US26
	1643	DDB2	damage specific DNA binding protein 2(DDB2)	UL150A
	51366	UBR5	ubiquitin protein ligase E3 component n-recognin 5(UBR5)	US26
	23049	SMG1	SMG1, nonsense mediated mRNA decay associated PI3K related kinase(SMG1)	UL16
	8451	CUL4A	cullin 4A(CUL4A)	RL1
	3014	H2AFX	H2A histone family member X(H2AFX)	UL56
	Repressor p=0.000874
	4849	CNOT3	CCR4-NOT transcription complex subunit 3(CNOT3)	UL72
	56946	EMSY	EMSY, BRCA2 interacting transcriptional repressor(EMSY)	US22
	79811	SLTM	SAFB like transcription modulator(SLTM)	US22, US26
	9611	NCOR1	nuclear receptor corepressor 1(NCOR1)	US26
	4848	CNOT2	CCR4-NOT transcription complex subunit 2(CNOT2)	UL72
	8841	HDAC3	histone deacetylase 3(HDAC3)	US26
	6597	SMARCA4	SWI/SNF related, matrix associated, actin dependent regulator of chromatin, subfamily a, member 4(SMARCA4)	US26
	100526737	RBM14-RBM4	RBM14-RBM4 readthrough(RBM14-RBM4)	US22
	23019	CNOT1	CCR4-NOT transcription complex subunit 1(CNOT1)	UL72
	5928	RBBP4	RB binding protein 4, chromatin remodeling factor(RBBP4)	US14
	6294	SAFB	scaffold attachment factor B(SAFB)	US22
	29883	CNOT7	CCR4-NOT transcription complex subunit 7(CNOT7)	UL72
	23272	FAM208A	family with sequence similarity 208 member A(FAM208A)	US22
	5036	PA2G4	proliferation-associated 2G4(PA2G4)	UL56
	10514	MYBBP1A	MYB binding protein 1a(MYBBP1A)	UL105, UL150A
	9125	CNOT9	CCR4-NOT transcription complex subunit 9(CNOT9)	UL72
	23528	ZNF281	zinc finger protein 281(ZNF281)	UL103
	2909	ARHGAP35	Rho GTPase activating protein 35(ARHGAP35)	UL150A
	7536	SF1	splicing factor 1(SF1)	US26
	51497	NELFCD	negative elongation factor complex member C/D(NELFCD)	UL150A
	23598	PATZ1	POZ/BTB and AT hook containing zinc finger 1(PATZ1)	US22
	4017	LOXL2	lysyl oxidase like 2(LOXL2)	UL40
	9612	NCOR2	nuclear receptor corepressor 2(NCOR2)	UL150A, US26
	23429	RYBP	RING1 and YY1 binding protein(RYBP)	US22
	9667	SAFB2	scaffold attachment factor B2(SAFB2)	US22
	10346	TRIM22	tripartite motif containing 22(TRIM22)	UL71
	9337	CNOT8	CCR4-NOT transcription complex subunit 8(CNOT8)	UL72
	165	AEBP1	AE binding protein 1(AEBP1)	UL40
	51274	KLF3	Kruppel like factor 3(KLF3)	US26
	51341	ZBTB7A	zinc finger and BTB domain containing 7A(ZBTB7A)	US26
	6670	SP3	Sp3 transcription factor(SP3)	US22
	6015	RING1	ring finger protein 1(RING1)	US22
	51535	PPHLN1	periphilin 1(PPHLN1)	US22
	6667	SP1	Sp1 transcription factor(SP1)	US22
	11278	KLF12	Kruppel like factor 12(KLF12)	US26
	57215	THAP11	THAP domain containing 11(THAP11)	US22
	27316	RBMX	RNA binding motif protein, X-linked(RBMX)	US22
	mRNA processing p=0.000222
	51585	PCF11	PCF11 cleavage and polyadenylation factor subunit(PCF11)	US22
	22803	XRN2	5'-3' exoribonuclease 2(XRN2)	US26
	55339	WDR33	WD repeat domain 33(WDR33)	US26
	22794	CASC3	cancer susceptibility candidate 3(CASC3)	US26
	22938	SNW1	SNW domain containing 1(SNW1)	US26
	10569	SLU7	SLU7 homolog, splicing factor(SLU7)	US26
	26993	AKAP8L	A-kinase anchoring protein 8 like(AKAP8L)	US22
	151987	PPP4R2	protein phosphatase 4 regulatory subunit 2(PPP4R2)	UL34
	9785	DHX38	DEAH-box helicase 38(DHX38)	US26
	23517	SKIV2L2	Ski2 like RNA helicase 2(SKIV2L2)	US26
	7884	SLBP	stem-loop binding protein(SLBP)	US26
	246175	CNOT6L	CCR4-NOT transcription complex subunit 6 like(CNOT6L)	UL72
	51645	PPIL1	peptidylprolyl isomerase like 1(PPIL1)	US26
	7536	SF1	splicing factor 1(SF1)	US26
	3192	HNRNPU	heterogeneous nuclear ribonucleoprotein U(HNRNPU)	US22
	29890	RBM15B	RNA binding motif protein 15B(RBM15B)	US22
	284695	ZNF326	zinc finger protein 326(ZNF326)	US22
	9169	SCAF11	SR-related CTD associated factor 11(SCAF11)	US26
	58517	RBM25	RNA binding motif protein 25(RBM25)	US14
	55596	ZCCHC8	zinc finger CCHC-type containing 8(ZCCHC8)	US26
	55599	RNPC3	RNA binding region (RNP1, RRM) containing 3(RNPC3)	UL72
	50628	GEMIN4	gem nuclear organelle associated protein 4(GEMIN4)	UL16
	53938	PPIL3	peptidylprolyl isomerase like 3(PPIL3)	US26
	22913	RALY	RALY heterogeneous nuclear ribonucleoprotein(RALY)	UL56
	494115	RBMXL1	RNA binding motif protein, X-linked like 1(RBMXL1)	US22
	27257	LSM1	LSM1 homolog, mRNA degradation associated(LSM1)	US14
	27316	RBMX	RNA binding motif protein, X-linked(RBMX)	US22
	Cell-cell adherens junction p=0.0000103
	56061	UBFD1	ubiquitin family domain containing 1(UBFD1)	US8
	6642	SNX1	sorting nexin 1(SNX1)	UL16
	56904	SH3GLB2	SH3 domain containing GRB2 like endophilin B2(SH3GLB2)	UL56
	2810	SFN	stratifin(SFN)	UL56
	10755	GIPC1	GIPC PDZ domain containing family member 1(GIPC1)	UL23
	9414	TJP2	tight junction protein 2(TJP2)	UL56
	1495	CTNNA1	catenin alpha 1(CTNNA1)	US14
	5756	TWF1	twinfilin actin binding protein 1(TWF1)	UL56
	85456	TNKS1BP1	tankyrase 1 binding protein 1(TNKS1BP1)	UL72
	3898	LAD1	ladinin 1(LAD1)	UL56
	999	CDH1	cadherin 1(CDH1)	UL97
	10694	CCT8	chaperonin containing TCP1 subunit 8(CCT8)	UL16
	54869	EPS8L1	EPS8 like 1(EPS8L1)	UL56
	114990	VASN	vasorin(VASN)	US14
	5493	PPL	periplakin(PPL)	UL56
	11187	PKP3	plakophilin 3(PKP3)	UL56
	301	ANXA1	annexin A1(ANXA1)	UL56
	50807	ASAP1	ArfGAP with SH3 domain, ankyrin repeat and PH domain 1(ASAP1)	UL105, UL150A, UL56
	79180	EFHD2	EF-hand domain family member D2(EFHD2)	UL56
	1824	DSC2	desmocollin 2(DSC2)	UL56
	4008	LMO7	LIM domain 7(LMO7)	US26
	6712	SPTBN2	spectrin beta, non-erythrocytic 2(SPTBN2)	UL56
	23650	TRIM29	tripartite motif containing 29(TRIM29)	UL56
	2125	EVPL	envoplakin(EVPL)	UL56
	357	SHROOM2	shroom family member 2(SHROOM2)	US26
	392	ARHGAP1	Rho GTPase activating protein 1(ARHGAP1)	UL56
	5297	PI4KA	phosphatidylinositol 4-kinase alpha(PI4KA)	UL16
	832	CAPZB	capping actin protein of muscle Z-line beta subunit(CAPZB)	UL72
	11344	TWF2	twinfilin actin binding protein 2(TWF2)	UL56
	85377	MICALL1	MICAL like 1(MICALL1)	UL23
	57650	KIAA1524	KIAA1524(KIAA1524)	UL16
	Blood microparticle p=0.00000586
	3273	HRG	histidine rich glycoprotein(HRG)	UL56
	2243	FGA	fibrinogen alpha chain(FGA)	UL56
	2266	FGG	fibrinogen gamma chain(FGG)	UL56
	3502	IGHG3	immunoglobulin heavy constant gamma 3 (G3m marker)(IGHG3)	UL56
	7018	TF	transferrin(TF)	UL56
	3507	IGHM	immunoglobulin heavy constant mu(IGHM)	UL56
	3700	ITIH4	inter-alpha-trypsin inhibitor heavy chain family member 4(ITIH4)	UL56
	2244	FGB	fibrinogen beta chain(FGB)	UL56
	714	C1QC	complement C1q C chain(C1QC)	UL56
	3043	HBB	hemoglobin subunit beta(HBB)	UL56
	629	CFB	complement factor B(CFB)	UL56
	3500	IGHG1	immunoglobulin heavy constant gamma 1 (G1m marker)(IGHG1)	UL56
	3501	IGHG2	immunoglobulin heavy constant gamma 2 (G2m marker)(IGHG2)	UL56
	3240	HP	haptoglobin(HP)	UL56
	1356	CP	ceruloplasmin(CP)	UL56
	3045	HBD	hemoglobin subunit delta(HBD)	UL56
	718	C3	complement C3(C3)	UL56
	335	APOA1	apolipoprotein A1(APOA1)	UL56
	5340	PLG	plasminogen(PLG)	UL56
	2	A2M	alpha-2-macroglobulin(A2M)	UL56
	100293534	C4B_2	complement component 4B (Chido blood group), copy 2(C4B_2)	UL56
	Nuclear-transcribed mRNA poly(A) tail shortening p=0.00000236
	25904	CNOT10	CCR4-NOT transcription complex subunit 10(CNOT10)	UL72
	4849	CNOT3	CCR4-NOT transcription complex subunit 3(CNOT3)	UL72
	57472	CNOT6	CCR4-NOT transcription complex subunit 6(CNOT6)	UL72
	7538	ZFP36	ZFP36 ring finger protein(ZFP36)	UL56
	23019	CNOT1	CCR4-NOT transcription complex subunit 1(CNOT1)	UL72
	55571	CNOT11	CCR4-NOT transcription complex subunit 11(CNOT11)	UL72
	29883	CNOT7	CCR4-NOT transcription complex subunit 7(CNOT7)	UL72
	4848	CNOT2	CCR4-NOT transcription complex subunit 2(CNOT2)	UL72
	9125	CNOT9	CCR4-NOT transcription complex subunit 9(CNOT9)	UL72
	246175	CNOT6L	CCR4-NOT transcription complex subunit 6 like(CNOT6L)	UL72
	85456	TNKS1BP1	tankyrase 1 binding protein 1(TNKS1BP1)	UL72
	9337	CNOT8	CCR4-NOT transcription complex subunit 8(CNOT8)	UL72
TP4	Thick filament p=0.000811
	57644	MYH7B	myosin heavy chain 7B(MYH7B)	US28
	4620	MYH2	myosin heavy chain 2(MYH2)	US28
	4624	MYH6	myosin heavy chain 6(MYH6)	US28
	4621	MYH3	myosin heavy chain 3(MYH3)	US28
	4625	MYH7	myosin heavy chain 7(MYH7)	US28
	4619	MYH1	myosin heavy chain 1(MYH1)	US28
	4622	MYH4	myosin heavy chain 4(MYH4)	US28
	Protein phosphatase type 2A complex p=0.00120
	54205	CYCS	cytochrome c, somatic(CYCS)	RL12
	55844	PPP2R2D	protein phosphatase 2 regulatory subunit Bdelta(PPP2R2D)	UL17
	5520	PPP2R2A	protein phosphatase 2 regulatory subunit Balpha(PPP2R2A)	UL17
	29888	STRN4	striatin 4(STRN4)	US9
	5516	PPP2CB	protein phosphatase 2 catalytic subunit beta(PPP2CB)	UL17
	5515	PPP2CA	protein phosphatase 2 catalytic subunit alpha(PPP2CA)	UL17
	5518	PPP2R1A	protein phosphatase 2 scaffold subunit Aalpha(PPP2R1A)	UL17
	29966	STRN3	striatin 3(STRN3)	US9
	6801	STRN	striatin(STRN)	US9
TP5	Ribosomal protein p=0.0000439
	51081	MRPS7	mitochondrial ribosomal protein S7(MRPS7)	UL44
	6196	RPS6KA2	ribosomal protein S6 kinase A2(RPS6KA2)	UL26
	28998	MRPL13	mitochondrial ribosomal protein L13(MRPL13)	UL84
	65005	MRPL9	mitochondrial ribosomal protein L9(MRPL9)	UL44
	51373	MRPS17	mitochondrial ribosomal protein S17(MRPS17)	UL44
	6155	RPL27	ribosomal protein L27(RPL27)	UL44
	60488	MRPS35	mitochondrial ribosomal protein S35(MRPS35)	UL44
	6166	RPL36AL	ribosomal protein L36a like(RPL36AL)	UL44
	57129	MRPL47	mitochondrial ribosomal protein L47(MRPL47)	UL44
	7818	DAP3	death associated protein 3(DAP3)	UL22A, UL44
	64432	MRPS25	mitochondrial ribosomal protein S25(MRPS25)	UL44
	28973	MRPS18B	mitochondrial ribosomal protein S18B(MRPS18B)	UL44
	6143	RPL19	ribosomal protein L19(RPL19)	UL44
	64975	MRPL41	mitochondrial ribosomal protein L41(MRPL41)	UL44
	55168	MRPS18A	mitochondrial ribosomal protein S18A(MRPS18A)	UL132
	64960	MRPS15	mitochondrial ribosomal protein S15(MRPS15)	UL94
	6197	RPS6KA3	ribosomal protein S6 kinase A3(RPS6KA3)	UL25, UL26
	6161	RPL32	ribosomal protein L32(RPL32)	UL44
	10240	MRPS31	mitochondrial ribosomal protein S31(MRPS31)	UL44
	29074	MRPL18	mitochondrial ribosomal protein L18(MRPL18)	UL44
	54534	MRPL50	mitochondrial ribosomal protein L50(MRPL50)	UL84
	65993	MRPS34	mitochondrial ribosomal protein S34(MRPS34)	UL44
	64978	MRPL38	mitochondrial ribosomal protein L38(MRPL38)	UL26, UL44
	56945	MRPS22	mitochondrial ribosomal protein S22(MRPS22)	UL22A, UL26, UL44
	6165	RPL35A	ribosomal protein L35a(RPL35A)	UL44
	64965	MRPS9	mitochondrial ribosomal protein S9(MRPS9)	UL44
	25873	RPL36	ribosomal protein L36(RPL36)	UL44
	64949	MRPS26	mitochondrial ribosomal protein S26(MRPS26)	UL44
	Intracellular trafficking and secretion p=0.0209
	6814	STXBP3	syntaxin binding protein 3(STXBP3)	US27
	65082	VPS33A	VPS33A, CORVET/HOPS core subunit(VPS33A)	UL50
	54832	VPS13C	vacuolar protein sorting 13 homolog C(VPS13C)	UL86, UL99
	26276	VPS33B	VPS33B, late endosome and lysosome associated(VPS33B)	UL82
	25852	ARMC8	armadillo repeat containing 8(ARMC8)	UL26
	10483	SEC23B	Sec23 homolog B, coat complex II component(SEC23B)	UL26
	10427	SEC24B	SEC24 homolog B, COPII coat complex component(SEC24B)	UL26
	10484	SEC23A	Sec23 homolog A, coat complex II component(SEC23A)	UL26
	55102	ATG2B	autophagy related 2B(ATG2B)	UL47
	11311	VPS45	vacuolar protein sorting 45 homolog(VPS45)	US27, UL100
	23256	SCFD1	sec1 family domain containing 1(SCFD1)	UL47
	6845	VAMP7	vesicle associated membrane protein 7(VAMP7)	US27
	10802	SEC24A	SEC24 homolog A, COPII coat complex component(SEC24A)	UL26

## Sheet: Supplementary File 4D
Bait	Bait name	Prey Gene Name	Prey name	Bait Class	Prey Class	Bait origin	Prey origin	Average PSMs	Entropy	z-score	NWD score
US23	Protein US23	US24	Tegument protein US24	Tp1	Tp1	Tegument	Tegument	52	0.987138	6.76136	0.479845
UL29	Protein UL29	UL38	Apoptosis inhibitor UL38	Tp1	Tp2	Tegument	Tegument	26.5	0.979869	3.89329	0.831978
UL27	Protein UL27	UL53	Virion nuclear egress NEC1	Tp1	Tp5		Tegument	3	1	0.186865	1.55119
UL135	Protein UL135	UL53	Virion nuclear egress NEC1	Tp1	Tp5		Tegument	1.5	0.954434	0.0278749	1.09686
UL38	Apoptosis inhibitor UL38	UL29	Protein UL29	Tp2	Tp1	Tegument	Tegument	17.5	0.931563	3.41393	1.29896
US12	Membrane protein US12	UL78	Envelope protein UL78	Tp2	Tp2			2	1	0.825015	1.0358
US12	Membrane protein US12	UL74	Envelope glycoprotein O	Tp2	Tp5			1.5	0.954434	3.7814	3.63645
UL37	Envelope glycoprotein UL37	UL53	Virion nuclear egress NEC1	Tp2	Tp5		Tegument	3.5	0.988699	0.239862	1.67548
UL54	DNA polymerase	UL44	DNA polymerase accessory protein (DNA polymerase processivity subunit)	Tp2	Tp5			108	0.999939	3.93385	0.339758
UL16	Membrane glycoprotein UL16	US12	Membrane protein US12	Tp3	Tp2			3.5	0.896038	3.28309	2.1203
UL40	Membrane glycoprotein UL40	UL78	Envelope protein UL78	Tp3	Tp2			8.5	0.943602	5.66099	1.45959
UL40	Membrane glycoprotein UL40	UL103	Cytoplasmic envelopment protein 1	Tp3	Tp3		Tegument	1.5	0.954434	0.90944	1.46565
UL16	Membrane glycoprotein UL16	UL56	DNA packaging protein, Tripartite terminase subunit 1	Tp3	Tp3			66.5	0.998031	4.42224	1.06995
US22	Tegument protein US22	UL76	Nuclear protein UL24	Tp3	Tp5	Tegument		11	0.994539	8.07709	6.42034
UL40	Membrane glycoprotein UL40	UL85	Capsid triplex subunit 2 (TRX2)	Tp3	Tp5		Capsid	5.5	0.994985	0.651656	1.86553
UL105	Helicase (Helicase-primase helicase subunit)	UL47	Inner Tegument protein, ITP	Tp3	Tp5		Tegument	16.5	0.994377	0.385928	1.40092
UL40	Membrane glycoprotein UL40	UL74	Envelope glycoprotein O	Tp3	Tp5			4	0.964079	0.183465	1.39399
US8	Membrane glycoprotein US8	UL53	Virion nuclear egress NEC1	Tp3	Tp5		Tegument	2	0.881291	0.0808717	1.26654
UL40	Membrane glycoprotein UL40	UL47	Inner Tegument protein, ITP	Tp3	Tp5		Tegument	11.5	0.998747	0.225385	1.16956
US22	Tegument protein US22	UL94	Cytoplasmic envelopment protein 2	Tp3	Tp5	Tegument	Tegument	19	1	1.25146	1.00648
UL56	DNA packaging protein, Tripartite terminase subunit 1	UL51	DNA packaging protein, Tripartite terminase subunit 2	Tp3	Tp5		Capsid	1	1	0.743648	0.546589
US30	Membrane protein US30	UL53	Virion nuclear egress NEC1	Tp4	Tp5		Tegument	2	1	0.0808717	1.26654
RL12	Membrane protein RL12	UL57	Major DNA binding protein (Single-stranded DNA-binding protein)	Tp4	Tp5			40.5	0.999893	0.414542	1.20697
UL121	Membrane protein UL121	UL14	Membrane protein UL14	Tp5	Tp2			2.5	0.979869	0.838751	8.68895
UL4	Envelope glycoprotein UL4	UL14	Membrane protein UL14	Tp5	Tp2			1.5	0.954434	0.460515	6.73043
UL141	Membrane glycoprotein UL141	US12	Membrane protein US12	Tp5	Tp2			2.5	0.979869	2.28586	1.79198
UL121	Membrane protein UL121	UL78	Envelope protein UL78	Tp5	Tp2			10.5	0.998509	7.05921	1.62225
UL44	DNA polymerase accessory protein (DNA polymerase processivity subunit)	UL114	UL114 (Uracil-DNA glycosylase)	Tp5	Tp2			26	0.998973	1.8025	0.596864
UL44	DNA polymerase accessory protein (DNA polymerase processivity subunit)	UL54	DNA polymerase	Tp5	Tp2			86.5	0.999786	2.65768	0.498955
UL74	Envelope glycoprotein O	UL103	Cytoplasmic envelopment protein 1	Tp5	Tp3		Tegument	3	0.940286	2.01513	2.07274
US27	Envelope glycoprotein US27	UL71	Tegument protein UL51	Tp5	Tp3		Tegument	93.5	0.989176	3.96841	1.37118
UL100	Envelope glycoprotein M (gM)	UL71	Tegument protein UL51	Tp5	Tp3		Tegument	50.5	0.998266	1.85889	1.00771
UL51	DNA packaging protein, Tripartite terminase subunit 2	UL56	DNA packaging protein, Tripartite terminase subunit 1	Tp5	Tp3	Capsid		58	0.996625	3.81843	0.999233
UL83	Tegument protein pp65	UL97	Serine/threonine protein kinase UL97	Tp5	Tp3		Tegument	13.5	0.99908	4.81521	0.119352
UL86	Major capsid protein (MCP)	UL48A	Small capsomere-interacting protein	Tp5	Tp5	Capsid	Capsid	4.5	0.992774	12.3291	92.7357
US27	Envelope glycoprotein US27	UL140	Protein UL140	Tp5	Tp5			2	1	4.58732	11.8983
UL94	Cytoplasmic envelopment protein 2	UL99	Cytoplasmic envelopment protein 3	Tp5	Tp5	Tegument	Tegument	5.5	0.994985	0.599015	8.06176
RL10	Envelope glycoprotein RL10	UL22A	Glycoprotein UL22A	Tp5	Tp5			2.5	0.979869	2.82307	7.11831
UL4	Envelope glycoprotein UL4	UL130	Envelope glycoprotein UL130	Tp5	Tp5			2	1	0.662777	4.5705
UL50	Virion nuclear egress NEC2	UL53	Virion nuclear egress NEC1	Tp5	Tp5	Tegument	Tegument	22.5	0.99693	2.25374	4.24812
UL75	Envelope glycoprotein H (gH)	UL74	Envelope glycoprotein O	Tp5	Tp5			35	0.997709	2.53793	4.12349
UL47	Inner Tegument protein, ITP	UL48	Large Tegument protein, LTP	Tp5	Tp5	Tegument	Tegument	129	1	12.1658	3.90487
UL44	DNA polymerase accessory protein (DNA polymerase processivity subunit)	UL76	Nuclear protein UL24	Tp5	Tp5			2	0.881291	1.33321	2.73764
UL99	Cytoplasmic envelopment protein 3	UL94	Cytoplasmic envelopment protein 2	Tp5	Tp5	Tegument	Tegument	124	0.994362	9.24837	2.57121
UL75	Envelope glycoprotein H (gH)	UL115	Envelope glycoprotein L (gL)	Tp5	Tp5			43.5	0.920178	10.9448	2.42793
UL44	DNA polymerase accessory protein (DNA polymerase processivity subunit)	UL43	Tegument protein UL43	Tp5	Tp5		Tegument	8.5	0.997772	0.228308	1.6706
UL115	Envelope glycoprotein L (gL)	UL74	Envelope glycoprotein O	Tp5	Tp5			5	0.976021	0.259416	1.55853
UL48A	Small capsomere-interacting protein	UL86	Major capsid protein (MCP)	Tp5	Tp5	Capsid	Capsid	111	0.991629	2.51777	1.55463
UL26	Tegument protein UL26	UL53	Virion nuclear egress NEC1	Tp5	Tp5	Tegument	Tegument	3	0.940286	0.186865	1.55119
UL73	Envelope glycoprotein N	UL100	Envelope glycoprotein M (gM)	Tp5	Tp5			25.5	0.939115	11.3677	1.38235
UL82	Tegument protein pp71	UL32	Tegument protein pp150	Tp5	Tp5	Tegument	Tegument	152.5	0.994377	5.44029	1.28486
US27	Envelope glycoprotein US27	UL132	Envelope glycoprotein UL132	Tp5	Tp5			95	0.949986	4.20118	1.28171
UL83	Tegument protein pp65	UL43	Tegument protein UL43	Tp5	Tp5		Tegument	4.5	0.934068	0.066283	1.21554
UL74	Envelope glycoprotein O	UL75	Envelope glycoprotein H (gH)	Tp5	Tp5			16	1	1.70915	1.17693
UL74	Envelope glycoprotein O	UL115	Envelope glycoprotein L (gL)	Tp5	Tp5			9.5	0.983708	2.21629	1.13463
UL94	Cytoplasmic envelopment protein 2	UL83	Tegument protein pp65	Tp5	Tp5	Tegument		278	0.993209	5.37638	1.12706
UL26	Tegument protein UL26	UL85	Capsid triplex subunit 2 (TRX2)	Tp5	Tp5	Tegument	Capsid	2	1	0.158684	1.12496
UL32	Tegument protein pp150	UL85	Capsid triplex subunit 2 (TRX2)	Tp5	Tp5	Tegument	Capsid	2	0.881291	0.158684	1.12496
UL82	Tegument protein pp71	UL85	Capsid triplex subunit 2 (TRX2)	Tp5	Tp5	Tegument	Capsid	2	1	0.158684	1.12496
UL52	Packaging protein UL32 homolog	UL53	Virion nuclear egress NEC1	Tp5	Tp5	Capsid	Tegument	1.5	0.954434	0.0278749	1.09686
UL141	Membrane glycoprotein UL141	UL75	Envelope glycoprotein H (gH)	Tp5	Tp5			13.5	0.99908	1.41039	1.08108
UL4	Envelope glycoprotein UL4	UL75	Envelope glycoprotein H (gH)	Tp5	Tp5			13.5	0.99908	1.41039	1.08108
UL30	Protein UL30	UL47	Inner Tegument protein, ITP	Tp5	Tp5		Tegument	9.5	0.998196	0.161168	1.063
UL4	Envelope glycoprotein UL4	UL47	Inner Tegument protein, ITP	Tp5	Tp5		Tegument	8.5	0.997772	0.12906	1.0055
UL115	Envelope glycoprotein L (gL)	UL75	Envelope glycoprotein H (gH)	Tp5	Tp5			10	0.973668	0.992124	0.930446
UL35	Tegument protein UL35	UL82	Tegument protein pp71	Tp5	Tp5	Tegument	Tegument	8	1	-0.00948741	0.764974
UL82	Tegument protein pp71	UL35	Tegument protein UL35	Tp5	Tp5	Tegument	Tegument	76.5	0.988992	4.9048	0.631393
UL75	Envelope glycoprotein H (gH)	UL55	Envelope glycoprotein B (gB)	Tp5	Tp5			3.5	0.988699	-0.0283045	0.587981
UL75	Envelope glycoprotein H (gH)	UL141	Membrane glycoprotein UL141	Tp5	Tp5			100	0.992846	9.06637	0.51319
UL51	DNA packaging protein, Tripartite terminase subunit 2	UL89	DNA packaging protein, Tripartite terminase subunit 3	Tp5	Tp5	Capsid		35	0.999428	7.42211	0.267825
UL26	Tegument protein UL26	UL25	Phosphoprotein 85 (pp85)	Tp5	Tp5	Tegument	Tegument	136	1	7.49507	0.247308
