# Supplementary material for: Human cytomegalovirus interactome analysis identifies degradation hubs, domain associations and viral protein functions
Source: eLife. 2019 Dec 24;8:e49894. doi: 10.7554/eLife.49894 (PMC6959991; doi:10.7554/eLife.49894)
Supplement: Supplementary file 5. — (A) HCMV proteins that contain each described Pfam domain. Links are given to additional information on each domain on the Pfam website. Overall 96 domains have been identified in HCMV proteins by Pfam, however only 10 domains were identified in two or more baits. Only this subset was examined to increase confidence in domain association predictions. (B) Subset of Supplementary file 2B illustrating individual protein-protein interactions that underpin data shown in Figure 4A. [file elife-49894-supp5.xlsx]

## Sheet: Supplementary File 5A
Domain name	Number of proteins	HCMV protein members	PFAM accession	Domain link
US22	13	IRS1, TRS1, US22, US23, US24, US26, UL23, UL24, UL26, UL29, UL36, UL38, UL43	PF02393	https://pfam.xfam.org/family/US22
Bax1-I	5	US12, US15, US17, US20, US21	PF01027	https://pfam.xfam.org/family/PF01027
CMV_US	4	US7, US8, US9, US11	PF08001	http://pfam.xfam.org/family/CMV_US
7tm_1	3	US27, US28, UL33	PF00001	https://pfam.xfam.org/family/7tm_1
RL11D	2	RL5A, RL6	PF11088	http://pfam.xfam.org/family/PF11088
Herpes_IE2_3	2	UL117, UL122	PF03361	http://pfam.xfam.org/family/PF03361
UL141	2	UL141, UL14	PF16758	https://pfam.xfam.org/family/PF16758
Herpes_pp85	2	UL25, UL35	PF04637	https://pfam.xfam.org/family/PF04637
Herpes_UL82_83	2	UL82, UL83	PF05784	https://pfam.xfam.org/family/PF05784
Cytomega_US3	2	US2, US3	PF05963	https://pfam.xfam.org/family/PF05963

## Sheet: Supplementary File 5B
Bait	PFAM Domain	Prey Species	Prey Uniprot-l	Prey Gene Name	Interacting PFAM domains	Average PSMs	Entropy	z-score	NWD score
UL25	Herpes pp85	HUMAN	O43639	NCK2	SH2,SH3 9	13.5	0.885613	6.3983	58.2235
UL25	Herpes pp85	HUMAN	P16333	NCK1	SH2,SH3 9	5.5	0.994985	11.5836	39.916
UL35	Herpes pp85	HCMVM	F5HBC6	UL82	Herpes UL82 83	8	1	-0.00948741	0.764974
US27	7tm 1	HUMAN	P30825	SLC7A1	AA permease	1.5	0.954434	3.27888	1.93462
US27	7tm 1	HUMAN	Q9UK23	NAGPA	NAGPA	2	0.881291	2.49627	1.50991
US27	7tm 1	HUMAN	P20338	RAB4A	Ras	4	0.964079	4.58732	16.8267
US27	7tm 1	HUMAN	Q86YS6	RAB43	Ras	2.5	0.979869	4.58732	13.3027
US27	7tm 1	HUMAN	Q9NRW1	RAB6B	Ras	2.5	0.979869	4.58732	13.3027
US27	7tm 1	HUMAN	Q15771	RAB30	Ras	2	0.881291	4.58732	11.8983
US27	7tm 1	HUMAN	P20340-2	RAB6A	Ras	12	0.958042	3.91827	2.53932
US27	7tm 1	HUMAN	Q6IQ22	RAB12	Ras	4	0.964079	3.90765	2.35694
US27	7tm 1	HUMAN	P20337	RAB3B	Ras	2.5	0.979869	3.7646	1.74155
US27	7tm 1	HUMAN	Q9UL25	RAB21	Ras	2	0.881291	3.13633	1.45623
US27	7tm 1	HUMAN	O14966	RAB29	Ras	1.5	0.954434	1.86113	1.24325
US27	7tm 1	HUMAN	Q9UP95	SLC12A4	SLC12,AA permease	1.5	0.954434	4.58732	10.3042
US27	7tm 1	HUMAN	Q9UHW9	SLC12A6	SLC12,AA permease	2	0.881291	4.08473	4.35285
US27	7tm 1	HUMAN	Q9BXP2	SLC12A9	SLC12,AA permease	3	0.940286	2.29119	1.0499
US27	7tm 1	HUMAN	O43752	STX6	SNARE	6	0.982859	4.04459	4.53309
US27	7tm 1	HUMAN	O14662	STX16	SNARE	8	1	4.00153	1.74017
US27	7tm 1	HUMAN	Q86Y82	STX12	SNARE	8.5	0.997772	3.54271	1.23076
US27	7tm 1	HUMAN	O15400	STX7	SNARE	8	0.989993	4.08261	1.10735
US27	7tm 1	HUMAN	Q9UNK0	STX8	SNARE	3.5	0.988699	3.47147	1.11087
US27	7tm 1	HUMAN	P51809-2	VAMP7	Synaptobrevin	6	0.982859	4.58732	20.6084
US27	7tm 1	HUMAN	P51809	VAMP7	Synaptobrevin	1.5	0.954434	4.58732	10.3042
US27	7tm 1	HUMAN	P63027	VAMP2	Synaptobrevin	3	0.940286	2.86376	1.04335
US27	7tm 1	HUMAN	Q9Y487	ATP6V0A2	V ATPase I	3	1	2.11513	1.23767
US27	7tm 1	HUMAN	Q9UEU0	VTI1B	V-SNARE,SNARE	1.5	0.954434	4.58732	10.3042
US27	7tm 1	HUMAN	Q96AJ9	VTI1A	V-SNARE,SNARE	4.5	0.992774	4.47614	7.40697
US28	7tm 1	HUMAN	Q9UKX2	MYH2	Myosin head,Myosin tail 1,Myosin N	54	0.984401	4.58732	61.8252
US28	7tm 1	HUMAN	P13533	MYH6	Myosin head,Myosin tail 1,Myosin N	20	0.998283	4.58732	37.6256
US28	7tm 1	HUMAN	A7E2Y1	MYH7B	Myosin head,Myosin tail 1,Myosin N	17	0.997643	4.58732	34.6891
US28	7tm 1	HUMAN	Q9Y623	MYH4	Myosin head,Myosin tail 1,Myosin N	4.5	0.992774	4.58732	17.8474
US28	7tm 1	HUMAN	P11055	MYH3	Myosin head,Myosin tail 1,Myosin N	4	0.964079	4.58732	16.8267
US28	7tm 1	HUMAN	P12882	MYH1	Myosin head,Myosin tail 1,Myosin N	3	1	4.58732	14.5723
US28	7tm 1	HUMAN	P12883	MYH7	Myosin head,Myosin tail 1,Myosin N	2	0.881291	4.58732	11.8983
US28	7tm 1	HUMAN	Q9UK23	NAGPA	NAGPA	2.5	0.979869	3.22303	1.68813
US28	7tm 1	HUMAN	P20340-2	RAB6A	Ras	3.5	0.988699	0.860299	1.37139
US28	7tm 1	HUMAN	Q9Y487	ATP6V0A2	V ATPase I	2	1	1.24641	1.01055
RL6	RL11D	HUMAN	Q86V21	AACS	ACAS N	2.5	0.979869	11.4432	26.5278
RL6	RL11D	HUMAN	Q96K17	BTF3L4	NAC	2.5	0.979869	11.4432	26.5278
RL6	RL11D	HUMAN	E9PAV3	NACA	NAC	7	0.987138	6.88758	0.0348586
RL6	RL11D	HUMAN	P62256	UBE2H	UQ con	1.5	0.954434	8.94777	10.4473
RL6	RL11D	HUMAN	Q16763	UBE2S	UQ con	1.5	0.954434	6.3823	6.92903
RL6	RL11D	HUMAN	P61088	UBE2N	UQ con	4.5	0.992774	9.77979	5.9426
RL6	RL11D	HUMAN	Q13404-1	UBE2V1	UQ con	5	1	6.9404	2.23078
UL117	Herpes IE2 3	HUMAN	Q9H3K6	BOLA2	BolA	2.5	0.979869	5.99273	1.50142
UL122	Herpes IE2 3	HUMAN	Q9H3K6	BOLA2	BolA	1.5	0.954434	3.48149	1.16299
UL14	UL141	HUMAN	Q14697-2	GANAB	Glyco hydro 31,Gal mutarotas 2	418	0.989679	10.4157	0.639357
UL14	UL141	HUMAN	Q14697	GANAB	Glyco hydro 31,Gal mutarotas 2	6.5	0.996317	7.35766	0.195533
UL141	UL141	HUMAN	O00220	TNFRSF10A	TNFR c6	2	0.881291	6.79242	22.2235
UL141	UL141	HUMAN	Q9UBN6	TNFRSF10D	TNFR c6	3.5	0.988699	4.93694	8.19801
UL141	UL141	HUMAN	O14763	TNFRSF10B	TNFR c6	7	0.987138	5.46061	2.9528
UL141	UL141	HUMAN	P19438	TNFRSF1A	TNFR c6	3	0.940286	4.78173	2.61435
US3	Cytomega US3	HUMAN	Q06481	APLP2	Kunitz BPTI,APP N,APP E2,APP Cu bd,APP amyloid	1.5	0.954434	4.35557	1.7315
US3	Cytomega US3	HUMAN	P05067	APP	Kunitz BPTI,APP N,APP E2,APP Cu bd,APP amyloid	4.5	0.992774	5.62026	1.09136
US7	CMV US	HUMAN	Q5VSL9	STRIP1	N1221,DUF3402	2	1	0.908268	8.3175
US9	CMV US	HUMAN	Q9ULQ0	STRIP2	N1221,DUF3402	3	1	11.6939	29.8716
US9	CMV US	HUMAN	Q5VSL9	STRIP1	N1221,DUF3402	24.5	0.999711	12.2493	29.1113
US9	CMV US	HUMAN	Q9NVK5	FGFR1OP2	SIKE	19	0.992399	12.3291	190.554
US9	CMV US	HUMAN	Q9NVK5-2	FGFR1OP2	SIKE	3.5	0.988699	12.3291	81.7852
US9	CMV US	HUMAN	Q9BRV8-2	SIKE1	SIKE	6.5	0.966619	12.1854	48.8171
US9	CMV US	HUMAN	O43815	STRN	Striatin	57.5	0.995653	11.8399	0.827832
US9	CMV US	HUMAN	Q13033	STRN3	Striatin	29.5	0.998196	10.2854	0.353955
US12	Bax1-I	HUMAN	Q29980	MICB	C1-set	2.5	0.811278	4.2489	5.03609
US12	Bax1-I	HUMAN	Q29983	MICA	C1-set	2.5	0.979869	1.82919	1.69693
US12	Bax1-I	HUMAN	P00533	EGFR	Recep L domain,GF recep IV,Furin-like	16	0.976021	3.85066	2.40086
US12	Bax1-I	HUMAN	P04626	ERBB2	Recep L domain,GF recep IV,Furin-like	4.5	0.992774	2.77751	2.33185
US15	Bax1-I	HUMAN	Q68D85	NCR3LG1	C1-set	3	1	2.26767	1.97641
US20	Bax1-I	HUMAN	P01860	IGHG3	C1-set	2	0.881291	2.31326	2.38332
US20	Bax1-I	HUMAN	P01834	IGKC	C1-set	3.5	0.988699	2.06195	1.44899
US20	Bax1-I	HUMAN	P01857	IGHG1	C1-set	2.5	0.979869	2.0455	1.21399
US20	Bax1-I	HUMAN	P04626	ERBB2	Recep L domain,GF recep IV,Furin-like	1.5	0.954434	0.659851	1.34629
US21	Bax1-I	HUMAN	Q14643	ITPR1	Ion trans,MIR,RYDR ITPR,RIH assoc,Ins145 P3 rec	3.5	0.988699	4.58732	15.7399
US21	Bax1-I	HUMAN	Q14573	ITPR3	Ion trans,MIR,RYDR ITPR,RIH assoc,Ins145 P3 rec	10	0.940286	4.56439	12.0988
US21	Bax1-I	HUMAN	Q14571	ITPR2	Ion trans,MIR,RYDR ITPR,RIH assoc,Ins145 P3 rec	10	0.993447	4.49682	11.2058
US21	Bax1-I	HUMAN	P04626	ERBB2	Recep L domain,GF recep IV,Furin-like	2	0.881291	1.01279	1.55456
IRS1	US22	HUMAN	Q9P2N7-5	KLHL13	CH,BTB	2	1	12.3291	61.8238
IRS1	US22	HUMAN	Q9P2J3	KLHL9	CH,BTB	1.5	0.954434	12.3291	53.541
IRS1	US22	HUMAN	P46109	CRKL	SH3 2	51.5	0.988699	12.1347	4.82165
IRS1	US22	HUMAN	P46108-2	CRK	SH3 2	4.5	0.992774	10.4734	4.31594
IRS1	US22	HUMAN	P46108	CRK	SH3 2	62.5	0.997772	11.9788	1.06301
IRS1	US22	HUMAN	Q99962	SH3GL2	SH3 2	2.5	0.811278	12.3291	69.1211
IRS1	US22	HUMAN	Q96JP2	MYO15B	SH3 2	2	0.881291	12.3291	61.8238
UL23	US22	HUMAN	Q8N3F8	MICALL1	CH	5.5	0.994985	8.76937	1.55969
UL23	US22	HUMAN	Q8IZ07	ANKRD13A	CH	3	1	1.58202	1.12705
UL23	US22	HUMAN	O76071	CIAO1	WD40	3	1	7.20529	2.61345
UL26	US22	HUMAN	Q9UL63	MKLN1	CH	32.5	0.995856	12.056	7.04257
UL26	US22	HUMAN	Q9H871	RMND5A	CLTH	7	0.948078	12.0856	30.5333
UL26	US22	HUMAN	Q7L5Y9	MAEA	CLTH	14.5	0.979869	12.0237	19.126
UL26	US22	HUMAN	Q6VN20	RANBP10	CLTH,LisH	5.5	0.994985	7.38826	1.14497
UL26	US22	HUMAN	Q96S59	RANBP9	CLTH,LisH	20	0.993123	9.70016	0.133537
UL26	US22	HUMAN	Q9NWU2	GID8	CLTH,LisH	7	1	9.38992	6.56346
UL26	US22	HUMAN	Q8IUH3-3	RBM45	RRM 1	1.5	0.954434	10.2447	19.2461
UL26	US22	HUMAN	Q8IUH3	RBM45	RRM 1	4.5	0.992774	6.33914	10.3054
UL26	US22	HUMAN	Q9NNW5	WDR6	WD40	23	0.994769	10.9502	4.52069
UL26	US22	HUMAN	Q9H7D7	WDR26	WD40	24	0.995188	11.8649	3.60364
UL26	US22	HUMAN	Q9C0J8	WDR33	WD40	12.5	0.990375	9.68726	2.96164
UL26	US22	HUMAN	Q8NFH4	NUP37	WD40	1.5	0.954434	3.53645	1.18135
UL26	US22	HUMAN	O95486	SEC24A	zf-Sec23 Sec24,Sec23 trunk,Sec23 helical,Sec23 BS,Gelsolin	80.5	0.998653	9.72288	0.204947
UL26	US22	HUMAN	Q15437	SEC23B	zf-Sec23 Sec24,Sec23 trunk,Sec23 helical,Sec23 BS,Gelsolin	104.5	0.999198	8.13102	0.191681
UL26	US22	HUMAN	Q15436	SEC23A	zf-Sec23 Sec24,Sec23 trunk,Sec23 helical,Sec23 BS,Gelsolin	100	0.998857	7.02252	0.150186
UL29	US22	HUMAN	Q9UPU5	USP24	CH	84.5	0.990971	11.7658	8.95255
UL29	US22	HUMAN	Q14839-2	CHD4	Chromo,DUF1087,DUF1086,CHDNT,CHDCT2,SNF2 N,Helicase C,CH	163.5	0.967838	11.6782	2.49367
UL29	US22	HUMAN	Q8TDI0	CHD5	Chromo,DUF1087,DUF1086,CHDNT,CHDCT2,SNF2 N,Helicase C,CH	9.5	0.998196	10.2361	1.05664
UL29	US22	HUMAN	Q9NWU2	GID8	CLTH,LisH	1.5	0.954434	1.87266	3.03829
UL29	US22	HUMAN	Q8WXI9	GATAD2B	GATA	81.5	0.997826	11.2276	1.09952
UL29	US22	HUMAN	O94776	MTA2	GATA,MTA R1,ELM2,BAH	126	0.918953	11.6575	1.28203
UL29	US22	HUMAN	O60907	TBL1X	LisH,WD40	15.5	0.993651	10.7696	7.75478
UL29	US22	HUMAN	Q9BZK7	TBL1XR1	LisH,WD40	23	0.998693	8.55481	0.77536
UL29	US22	HUMAN	Q9UBB5	MBD2	MBD C,MBDa,MBD	26.5	0.95778	11.4646	25.051
UL29	US22	HUMAN	O95983	MBD3	MBD C,MBDa,MBD	23	0.998693	10.8745	1.94199
UL29	US22	HUMAN	O75376	NCOR1	Myb DNA-binding	61	0.976798	10.8373	12.8099
UL29	US22	HUMAN	Q9Y618	NCOR2	Myb DNA-binding	70	0.975332	11.4183	6.46889
UL29	US22	HUMAN	Q9BTC8	MTA3	Myb DNA-binding,GATA,MTA R1,ELM2,BAH	28	0.991992	11.7291	59.5833
UL29	US22	HUMAN	Q13330	MTA1	Myb DNA-binding,GATA,MTA R1,ELM2,BAH	57.5	0.954434	11.569	8.05609
UL29	US22	HUMAN	Q9NNW5	WDR6	WD40	2	1	0.772605	1.33308
UL36	US22	HUMAN	Q9UK99	FBXO3	F-box-like	11	0.994539	10.1308	0.928853
UL36	US22	HUMAN	Q9NUL7	DDX28	Helicase C	4	0.964079	12.3291	87.432
UL38	US22	HUMAN	Q9UPU5	USP24	CH	25.5	0.967476	3.45708	4.918
UL38	US22	HUMAN	Q14839-2	CHD4	Chromo,DUF1087,DUF1086,CHDNT,CHDCT2,SNF2 N,Helicase C,CH	49	0.852405	3.35106	1.36514
UL38	US22	HUMAN	Q9UBB5	MBD2	MBD C,MBDa,MBD	10	0.973668	4.25114	15.3887
UL38	US22	HUMAN	O95983	MBD3	MBD C,MBDa,MBD	10	0.940286	4.59144	1.28051
UL38	US22	HUMAN	Q9BTC8	MTA3	Myb DNA-binding,GATA,MTA R1,ELM2,BAH	9	0.926819	3.6993	33.7805
UL38	US22	HUMAN	Q13330	MTA1	Myb DNA-binding,GATA,MTA R1,ELM2,BAH	20.5	0.929743	4.03569	4.81024
UL38	US22	HUMAN	Q03468	ERCC6	SNF2 N,Helicase C	3	0.940286	4.83043	1.81306
UL38	US22	HUMAN	Q16576	RBBP7	WD40	3	1	8.23997	10.5056
UL43	US22	HUMAN	P62258	YWHAE	14-3-3	240.5	0.969351	11.8305	0.512721
UL43	US22	HUMAN	Q04917	YWHAH	14-3-3	77.5	0.994985	11.8901	0.471025
UL43	US22	HUMAN	P61981	YWHAG	14-3-3	71	0.953787	11.8384	0.270769
UL43	US22	HUMAN	P63104	YWHAZ	14-3-3	94.5	0.9995	11.6244	0.211806
UL43	US22	HUMAN	P31946	YWHAB	14-3-3	53	0.885813	10.0506	0.127063
UL43	US22	HUMAN	P27348	YWHAQ	14-3-3	47.5	0.97726	10.3127	0.121421
US22	US22	HUMAN	Q5BKZ1	ZNF326	AKAP95	44	1	12.2524	6.08065
US22	US22	HUMAN	Q9ULX6	AKAP8L	AKAP95	23.5	0.999687	10.6341	0.473819
US22	US22	HUMAN	O43823	AKAP8	AKAP95	22	1	10.4212	0.177742
US22	US22	HUMAN	Q9UKB1	FBXW11	Beta-TrCP D,F-box-like,WD40	4	0.964079	5.00471	1.99917
US22	US22	HUMAN	Q7RTP6	MICAL3	CH	58	0.996625	12.237	26.2436
US22	US22	HUMAN	P78332	RBM6	CH	2.5	0.979869	2.88586	3.04133
US22	US22	HUMAN	O14647	CHD2	Chromo,SNF2 N,Helicase C,CH	15.5	0.993651	11.9645	24.3633
US22	US22	HUMAN	Q969H0	FBXW7	F-box-like,WD40	4.5	0.992774	8.21457	32.7255
US22	US22	HUMAN	Q96E39	RBMXL1	RBM1CTR,RRM 1	1.5	0.954434	12.3291	53.541
US22	US22	HUMAN	O75526	RBMXL2	RBM1CTR,RRM 1	7.5	0.974489	10.8114	2.68533
US22	US22	HUMAN	P38159	RBMX	RBM1CTR,RRM 1	27	1	11.6996	0.711114
US22	US22	HUMAN	Q8IXT5	RBM12B	RRM 1	4	1	11.624	20.5405
US22	US22	HUMAN	Q9Y580	RBM7	RRM 1	3	1	2.68809	5.41557
US22	US22	HUMAN	Q96PK6	RBM14	RRM 1	86.5	0.998832	8.5202	0.0956336
US22	US22	HUMAN	Q1KMD3	HNRNPUL2	SAP	148.5	0.997651	11.9435	1.23167
US22	US22	HUMAN	Q00839	HNRNPU	SAP	281.5	0.999617	11.4507	0.701741
US22	US22	HUMAN	Q9NWH9	SLTM	SAP,RRM 1	8	0.959687	9.78115	5.94965
US22	US22	HUMAN	Q14151	SAFB2	SAP,RRM 1	42.5	0.999122	9.87456	0.385102
US22	US22	HUMAN	Q8NDT2	RBM15B	SPOC,RRM 1	6.5	0.996317	12.3291	111.454
US22	US22	HUMAN	Q96T37	RBM15	SPOC,RRM 1	35	0.999428	12.1279	2.45671
US22	US22	HUMAN	Q9H5H4	ZNF768	zf-C2H2	5.5	0.994985	12.3291	102.523
US22	US22	HUMAN	Q02447	SP3	zf-C2H2	3.5	0.988699	12.3291	81.7852
US22	US22	HUMAN	Q6DD87	ZNF787	zf-C2H2	1.5	0.954434	12.3291	53.541
US22	US22	HUMAN	O43474	KLF4	zf-C2H2	3.5	0.896038	5.40747	18.6347
US22	US22	HUMAN	P08047	SP1	zf-C2H2	9	0.926819	8.31822	0.254809
US22	US22	HUMAN	Q9HBE1	PATZ1	zf-C2H2,BTB	2	0.881291	11.0203	22.98
US23	US22	HUMAN	Q9Y297	BTRC	Beta-TrCP D,F-box-like,WD40	2	1	2.85281	2.22646
US23	US22	HUMAN	Q15052	ARHGEF6	RhoGEF,CH,betaPIX CC	2.5	0.811278	4.34608	4.09339
US24	US22	HUMAN	Q9UKB1-3	FBXW11	Beta-TrCP D,F-box-like,WD40	3	0.940286	11.6939	29.8716
US24	US22	HUMAN	Q9Y297	BTRC	Beta-TrCP D,F-box-like,WD40	6	1	8.96525	3.85634
US24	US22	HUMAN	Q9UKB1	FBXW11	Beta-TrCP D,F-box-like,WD40	4	1	5.00471	1.99917
US24	US22	HUMAN	Q15052	ARHGEF6	RhoGEF,CH,betaPIX CC	6	1	10.6687	6.34145
US24	US22	HUMAN	Q14155	ARHGEF7	RhoGEF,CH,SH3 2	22.5	0.999659	7.09459	0.288141
US26	US22	HUMAN	Q5JSZ5-4	PRRC2B	BAT2 N	1.5	0.954434	10.2447	19.2461
US26	US22	HUMAN	Q9Y520-7	PRRC2C	BAT2 N	333	0.998728	12.1013	1.43475
US26	US22	HUMAN	Q5JSZ5	PRRC2B	BAT2 N	106	0.999746	12.0715	1.26847
US26	US22	HUMAN	P48634	PRRC2A	BAT2 N	92	1	11.3831	0.791894
US26	US22	HUMAN	Q8IY92	SLX4	BTB	4	1	12.3291	87.432
US26	US22	HUMAN	Q7RTP6	MICAL3	CH	6	0.982859	1.17424	8.44084
US26	US22	HUMAN	Q8WWI1	LMO7	CH	62	0.995378	11.2722	1.48222
US26	US22	HUMAN	P78332	RBM6	CH	9.5	0.998196	11.4325	5.92865
US26	US22	HUMAN	Q9P2N5	RBM27	CH	2	0.881291	7.00123	5.70209
US26	US22	HUMAN	Q92620	DHX38	Helicase C	3.5	0.988699	6.67742	1.58375
US26	US22	HUMAN	P42285	SKIV2L2	Helicase C,CH	31.5	0.999824	9.60274	0.187255
US26	US22	HUMAN	O60907	TBL1X	LisH,WD40	7	0.987138	4.77454	5.21138
US26	US22	HUMAN	O75376	NCOR1	Myb DNA-binding	28	0.996445	4.89703	8.67883
US26	US22	HUMAN	Q9Y618	NCOR2	Myb DNA-binding	27	0.991398	4.31092	4.01756
US26	US22	HUMAN	Q12774	ARHGEF5	RhoGEF	5.5	0.994985	12.3291	102.523
US26	US22	HUMAN	Q96PE2	ARHGEF17	RhoGEF	25.5	0.986888	12.2468	24.8655
US26	US22	HUMAN	Q92888-3	ARHGEF1	RhoGEF	5	1	7.6134	0.383837
US26	US22	HUMAN	Q9Y580	RBM7	RRM 1	12.5	0.990375	11.6463	11.0545
US26	US22	HUMAN	Q9NWH9	SLTM	SAP,RRM 1	4.5	0.992774	5.42049	4.46223
US26	US22	HUMAN	P51532	SMARCA4	SNF2 N,Helicase C	60.5	0.999564	7.06757	0.166729
US26	US22	HUMAN	Q92576	PHF3	SPOC	3.5	0.988699	9.59081	6.38337
US26	US22	HUMAN	Q9H2Y7	ZNF106	WD40	7.5	0.99718	12.3291	119.721
US26	US22	HUMAN	Q9C0J8	WDR33	WD40	3	1	2.15673	1.4509
US26	US22	HUMAN	Q9Y4X4	KLF12	zf-C2H2	6.5	0.996317	12.3291	111.454
US26	US22	HUMAN	P57682	KLF3	zf-C2H2	4	0.852405	12.3291	87.432
US26	US22	HUMAN	Q8N554	ZNF276	zf-C2H2	2	1	12.3291	61.8238
US26	US22	HUMAN	O43474	KLF4	zf-C2H2	7	1	10.9328	26.3535
US26	US22	HUMAN	O95365	ZBTB7A	zf-C2H2,BTB	7	1	12.3291	115.662
US26	US22	HUMAN	Q5VYS8	ZCCHC6	zf-CCHC,CH	3.5	0.988699	12.3291	81.7852
US26	US22	HUMAN	Q6NZY4	ZCCHC8	zf-CCHC,CH	34.5	0.998675	10.3612	0.378145
US26	US22	HUMAN	Q15637-5	SF1	zf-CCHC,CH	42.5	0.99756	8.23497	0.168483
