# Supplementary material for: Human cytomegalovirus interactome analysis identifies degradation hubs, domain associations and viral protein functions
Source: eLife. 2019 Dec 24;8:e49894. doi: 10.7554/eLife.49894 (PMC6959991; doi:10.7554/eLife.49894)
Supplement: Supplementary file 6. — Interactome data identified viral baits for 31 of these degraded proteins. [file elife-49894-supp6.xlsx]

## Sheet: Supplementary File 6
Uniprot	Gene Symbol	Description	Interactome
P52630	STAT2	Signal transducer and activator of transcription 2	UL123
Q96J02	ITCH	E3 ubiquitin-protein ligase Itchy homolog	UL42, UL55
Q96PU5	NEDD4L	E3 ubiquitin-protein ligase NEDD4-like	US30, UL20, UL42, UL55, UL133
P78357	CNTNAP1	Contactin-associated protein 1	US9, US21, UL55
P22694-2	PRKACB	Isoform 2 of cAMP-dependent protein kinase catalytic subunit beta	US9, US19, UL150A, ORFL147C
P55899	FCGRT	IgG receptor FcRn large subunit p51	US7, UL20
P11908-2	PRPS2	Isoform 2 of Ribose-phosphate pyrophosphokinase 2	US12
O75663	TIPRL	TIP41-like protein	US12
P61244	MAX	Protein max	UL94
Q15003	NCAPH	Condensin complex subunit 2	UL9, UL19, UL132
P56945-6	BCAR1	Isoform 6 of Breast cancer anti-estrogen resistance protein 1	UL86, UL150A, ORFL147C
Q96JK2	DCAF5	DDB1- and CUL4-associated factor 5	UL80.5
P23497-4	SP100	Isoform Sp100-C of Nuclear autoantigen Sp-100	UL56, ORFL147C
Q99685	MGLL	Monoglyceride lipase	UL50, ORFL147C
P31946	YWHAB	14-3-3 protein beta/alpha	UL43
P17302	GJA1	Gap junction alpha-1 protein	UL42, UL100, UL148A, UL148C, US21
Q86Y39	NDUFA11	NADH dehydrogenase [ubiquinone] 1 alpha subcomplex subunit 11	UL40
O14730	RIOK3	Serine/threonine-protein kinase RIO3	UL40
P16333	NCK1	Cytoplasmic protein NCK1	UL25
Q8IVD9	NUDCD3	NudC domain-containing protein 3	UL23
P14324	FDPS	Farnesyl pyrophosphate synthase	UL16
Q9NRY4	ARHGAP35	Rho GTPase-activating protein 35	UL150A
P01008	SERPINC1	Antithrombin-III	UL14, UL78, UL130
P17612	PRKACA	cAMP-dependent protein kinase catalytic subunit alpha	UL14
Q9Y6D5	ARFGEF2	Brefeldin A-inhibited guanine nucleotide-exchange protein 2	UL132, UL75
P04049-2	RAF1	Isoform 2 of RAF proto-oncogene serine/threonine-protein kinase	UL132
Q13671	RIN1	Ras and Rab interactor 1	UL132
Q13907-2	IDI1	Isoform 2 of Isopentenyl-diphosphate Delta-isomerase 1	UL13, UL27
P61088	UBE2N	Ubiquitin-conjugating enzyme E2 N	RL6, UL56
Q9UKI2	CDC42EP3	Cdc42 effector protein 3	ORFS343C
A1A4S6	ARHGAP10	Rho GTPase-activating protein 10	IRS1
Q9Y485	DMXL1	DmX-like protein 1
Q14527	HLTF	Helicase-like transcription factor
Q9H0V9-2	LMAN2L	Isoform 2 of VIP36-like protein
Q8NB16	MLKL	Mixed lineage kinase domain-like protein
Q9Y5G0	PCDHGB5	Protocadherin gamma-B5
P51805	PLXNA3	Plexin-A3
Q9H5K3	POMK	Protein O-mannose kinase
Q9Y2K1	ZBTB1	Zinc finger and BTB domain-containing protein 1
Q7Z3E5	ARMC9	LisH domain-containing protein ARMC9
Q99418	CYTH2	Cytohesin-2
Q2M2I8	AAK1	AP2-associated protein kinase 1
Q9UHI8	ADAMTS1	A disintegrin and metalloproteinase with thrombospondin motifs 1
O75689-2	ADAP1	Isoform 2 of Arf-GAP with dual PH domain-containing protein 1
Q9H1A4	ANAPC1	Anaphase-promoting complex subunit 1
Q9UJX6	ANAPC2	Anaphase-promoting complex subunit 2
Q9UJX5-3	ANAPC4	Isoform 3 of Anaphase-promoting complex subunit 4
Q9UJX4	ANAPC5	Anaphase-promoting complex subunit 5
Q14865	ARID5B	AT-rich interactive domain-containing protein 5B
P31939	ATIC	Bifunctional purine biosynthesis protein PURH
O75815	BCAR3	Breast cancer anti-estrogen resistance protein 3
Q5T5X7	BEND3	BEN domain-containing protein 3
Q13490	BIRC2	Baculoviral IAP repeat-containing protein 2
Q7L1Q6-3	BZW1	Isoform 3 of Basic leucine zipper and W2 domain-containing protein 1
Q9NWQ9	C14orf119	Uncharacterized protein C14orf119
P16152	CBR1	Carbonyl reductase [NADPH] 1
O00257	CBX4	E3 SUMO-protein ligase CBX4
Q8N4S0	CCDC82	Coiled-coil domain-containing protein 82
O95067	CCNB2	G2/mitotic-specific cyclin-B2
Q9Y4F5	CEP170B	Centrosomal protein of 170 kDa protein B
Q53ET0	CRTC2	CREB-regulated transcription coactivator 2
P09603	CSF1	Macrophage colony-stimulating factor 1
Q8TDX6	CSGALNACT1	Chondroitin sulfate N-acetylgalactosaminyltransferase 1
P41240	CSK	Tyrosine-protein kinase CSK
P27707	DCK	Deoxycytidine kinase
Q86XP1	DGKH	Diacylglycerol kinase eta
Q15392	DHCR24	Delta(24)-sterol reductase
Q86XF0	DHFRL1	Dihydrofolate reductase, mitochondrial
Q8TE73	DNAH5	Dynein heavy chain 5, axonemal
Q8N9I9-2	DTX3	Isoform 2 of Probable E3 ubiquitin-protein ligase DTX3
O14641	DVL2	Segment polarity protein dishevelled homolog DVL-2
P52799	EFNB2	Ephrin-B2
P54756	EPHA5	Ephrin type-A receptor 5
P54753	EPHB3	Ephrin type-B receptor 3
Q70Z53-3	FRA10AC1	Isoform 3 of Protein FRA10AC1
Q13480-2	GAB1	Isoform 2 of GRB2-associated-binding protein 1
Q92896-2	GLG1	Isoform 2 of Golgi apparatus protein 1
Q03113	GNA12	Guanine nucleotide-binding protein subunit alpha-12
Q4V328	GRIPAP1	GRIP1-associated protein 1
Q9BY41	HDAC8	Histone deacetylase 8
P16403	HIST1H1C	Histone H1.2
Q9Y561	LRP12	Low-density lipoprotein receptor-related protein 12
O75197	LRP5	Low-density lipoprotein receptor-related protein 5
Q15048	LRRC14	Leucine-rich repeat-containing protein 14
Q96JG8-4	MAGED4	Isoform 4 of Melanoma-associated antigen D4
Q9NTJ4-4	MAN2C1	Isoform 4 of Alpha-mannosidase 2C1
P46821	MAP1B	Microtubule-associated protein 1B
Q9Y2U5	MAP3K2	Mitogen-activated protein kinase kinase kinase 2
Q99759-2	MAP3K3	Isoform 2 of Mitogen-activated protein kinase kinase kinase 3
Q15691	MAPRE1	Microtubule-associated protein RP/EB family member 1
O95243	MBD4	Methyl-CpG-binding domain protein 4
Q14149	MORC3	MORC family CW-type zinc finger protein 3
Q15014	MORF4L2	Mortality factor 4-like protein 2
P14649	MYL6B	Myosin light chain 6B
Q96RE7	NACC1	Nucleus accumbens-associated protein 1
P55209	NAP1L1	Nucleosome assembly protein 1-like 1
O43776	NARS	Asparagine--tRNA ligase, cytoplasmic
Q8N2Q7	NLGN1	Neuroligin-1
P36639	NUDT1	7,8-dihydro-8-oxoguanine triphosphatase
Q86VP3-2	PACS2	Isoform 2 of Phosphofurin acidic cluster sorting protein 2
Q9HAU0-6	PLEKHA5	Isoform 6 of Pleckstrin homology domain-containing family A member 5
P13797	PLS3	Plastin-3
Q96SB3	PPP1R9B	Neurabin-2
Q16537	PPP2R5E	Serine/threonine-protein phosphatase 2A 56 kDa regulatory subunit epsilon isoform
P63098	PPP3R1	Calcineurin subunit B type 1
P60891	PRPS1	Ribose-phosphate pyrophosphokinase 1
Q15678	PTPN14	Tyrosine-protein phosphatase non-receptor type 14
Q86X27	RALGPS2	Ras-specific guanine nucleotide-releasing factor RalGPS2
P08134	RHOC	Rho-related GTP-binding protein RhoC
Q9BRS2	RIOK1	Serine/threonine-protein kinase RIO1
O75676	RPS6KA4	Ribosomal protein S6 kinase alpha-4
Q9NR31	SAR1A	GTP-binding protein SAR1a
Q9Y6B6	SAR1B	GTP-binding protein SAR1b
Q7Z333-4	SETX	Isoform 4 of Probable helicase senataxin
Q9P0V3	SH3BP4	SH3 domain-binding protein 4
Q9Y371	SH3GLB1	Endophilin-B1
Q8IXJ6	SIRT2	NAD-dependent protein deacetylase sirtuin-2
O95772	STARD3NL	MLN64 N-terminal domain homolog
Q15831	STK11	Serine/threonine-protein kinase STK11
P16949	STMN1	Stathmin
Q8IX01	SUGP2	SURP and G-patch domain-containing protein 2
Q9HA65	TBC1D17	TBC1 domain family member 17
Q9BV44	THUMPD3	THUMP domain-containing protein 3
Q9Y4K3	TRAF6	TNF receptor-associated factor 6
Q14258	TRIM25	E3 ubiquitin/ISG15 ligase TRIM25
Q16222	UAP1	UDP-N-acetylhexosamine pyrophosphorylase
Q5T4S7-2	UBR4	Isoform 2 of E3 ubiquitin-protein ligase UBR4
P23381	WARS	Tryptophan--tRNA ligase, cytoplasmic
Q9H4A3-7	WNK1	Isoform 6 of Serine/threonine-protein kinase WNK1
P54577	YARS	Tyrosine--tRNA ligase, cytoplasmic
O96006	ZBED1	Zinc finger BED domain-containing protein 1
O60281	ZNF292	Zinc finger protein 292
Q5TYW1	ZNF658	Zinc finger protein 658
