# Supplementary material for: Human cytomegalovirus interactome analysis identifies degradation hubs, domain associations and viral protein functions
Source: eLife. 2019 Dec 24;8:e49894. doi: 10.7554/eLife.49894 (PMC6959991; doi:10.7554/eLife.49894)
Supplement: Supplementary file 7. [file elife-49894-supp7.xlsx]

## Sheet: Supplementary File 7A
Term and associated Uniprot IDs	Gene Name	Description
RNA-binding p=0.106
O95777	LSM8	U6 snRNA-associated Sm-like protein LSm8
Q9NR56	MBNL1	Muscleblind-like protein 1
Q9BRP8	PYM1	Partner of Y14 and mago
Q9Y580	RBM7	RNA-binding protein 7
P26599	PTBP1	Polypyrimidine tract-binding protein 1
P09543	CNP	2',3'-cyclic-nucleotide 3'-phosphodiesterase
Q8IUH3	RBM45	RNA-binding protein 45
Q92879	CELF1	Isoform 4 of CUGBP Elav-like family member 1
Q8IY67	RAVER1	Isoform 2 of Ribonucleoprotein PTB-binding 1
mRNA splicing p=0.27
O95777	LSM8	U6 snRNA-associated Sm-like protein LSm8
Q9NR56	MBNL1	Muscleblind-like protein 1
P26599	PTBP1	Polypyrimidine tract-binding protein 1
Q92879	CELF1	Isoform 4 of CUGBP Elav-like family member 1
Q9NY27	PPP4R2	Serine/threonine-protein phosphatase 4 regulatory subunit 2

## Sheet: Supplementary File 7B
Term and associated Uniprot IDs	Gene Name	Description
TP53 Regulates Transcription of DNA Repair Genes, 4 entities, p=0.00135
Q8IXH7	NELFCD	Negative elongation factor C/D
P35269	GTF2F1	General transcription factor IIF subunit 1
Q8WX92	NELFB	Negative elongation factor B
Q92466	DDB2	DNA damage-binding protein 2
Transcription of HIV genome, 4 entities, p=0.00215
P29084	GTF2E2	Transcription initiation factor IIE subunit beta
Q8IXH7	NELFCD	Negative elongation factor C/D
P35269	GTF2F1	General transcription factor IIF subunit 1
Q8WX92	NELFB	Negative elongation factor B
RNA Polymerase II Pre-transcription Events, 4 entities, p=0.00339
P29084	GTF2E2	Transcription initiation factor IIE subunit beta
Q8IXH7	NELFCD	Negative elongation factor C/D
P35269	GTF2F1	General transcription factor IIF subunit 1
Q8WX92	NELFB	Negative elongation factor B
Late Phase of HIV Life Cycle, 5 entities, p=0.00513
P18754	RCC1	Isoform 2 of Regulator of chromosome condensation
P29084	GTF2E2	Transcription initiation factor IIE subunit beta
Q8IXH7	NELFCD	Negative elongation factor C/D
P35269	GTF2F1	General transcription factor IIF subunit 1
Q8WX92	NELFB	Negative elongation factor B
HIV Life Cycle, 5 entities, p=0.00719
P18754	RCC1	Isoform 2 of Regulator of chromosome condensation
P29084	GTF2E2	Transcription initiation factor IIE subunit beta
Q8IXH7	NELFCD	Negative elongation factor C/D
P35269	GTF2F1	General transcription factor IIF subunit 1
Q8WX92	NELFB	Negative elongation factor B

## Sheet: Supplementary File 7C
Term and associated Uniprot IDs	Gene Name	Description	Interacting baits (HCMV)	Interacting baits (KSHV)
Transcription-coupled nucleotide-excision repair p=0.00000000452
Q09472	EP300	Histone acetyltransferase p300	UL26, UL31	K9
P49916	LIG3	DNA ligase 3	RL8A, UL132, UL55, UL86	ORF73
P24928	POLR2A	DNA-directed RNA polymerase II subunit RPB1	UL87	ORF24
P19387	POLR2C	DNA-directed RNA polymerase II subunit RPB3	UL87, US15	ORF24
O15514	POLR2D	DNA-directed RNA polymerase II subunit RPB4	UL87	ORF24
P62487	POLR2G	DNA-directed RNA polymerase II subunit RPB7	UL87	ORF24
P52434	POLR2H	DNA-directed RNA polymerases I, II, and III subunit RPABC3	UL87, UL87, UL91	ORF24
P36954	POLR2I	DNA-directed RNA polymerase II subunit RPB9	UL87	ORF24
P53803	POLR2K	DNA-directed RNA polymerases I, II, and III subunit RPABC4	UL87, UL91	ORF24
P62875	POLR2L	DNA-directed RNA polymerases I, II, and III subunit RPABC5	UL87	ORF24
P27694	RPA1	Replication protein A 70 kDa DNA-binding subunit	UL105	ORF73
P15927	RPA2	Isoform 3 of Replication protein A 32 kDa subunit	UL105, US12, US14	ORF73
Q93009	USP7	Ubiquitin carboxyl-terminal hydrolase 7	UL83	ORF45
CTLH domain p=0.0000000652
Q9NWU2	GID8	Glucose-induced degradation protein 8 homolog	UL26, UL29, UL80.5	ORF21
Q7L5Y9	MAEA	Macrophage erythroblast attacher	UL26	ORF21
Q9UL63	MKLN1	Muskelin	UL26	ORF21
Q6VN20	RANBP10	Ran-binding protein 10	UL26	ORF21
Q96S59	RANBP9	Ran-binding protein 9	UL26	ORF21
Q9H871	RMND5A	Protein RMD5 homolog A	UL26	ORF21
Q9H7D7	WDR26	WD repeat-containing protein 26	UL25, UL26, UL80.5, US8	ORF21
CCR4-NOT complex p=0.000022
A5YKK6	CNOT1	Isoform 2 of CCR4-NOT transcription complex subunit 1	UL72	ORF49
Q9NZN8	CNOT2	CCR4-NOT transcription complex subunit 2	UL72	ORF49
O75175	CNOT3	CCR4-NOT transcription complex subunit 3	UL72	ORF49
Q9ULM6	CNOT6	CCR4-NOT transcription complex subunit 6	UL72	ORF49
Q9UIV1	CNOT7	CCR4-NOT transcription complex subunit 7	UL72	ORF49
Q9C0C2	TNKS1BP1	182 kDa tankyrase-1-binding protein	UL72	ORF49
Ubiquitin-protein transferase activity p=0.00629
Q13618	CUL3	Cullin-3	UL26	ORF16
Q86XK2	FBXO11	Isoform 5 of F-box only protein 11	UL104, UL80, UL80.5	K4_1
Q5T447	HECTD3	E3 ubiquitin-protein ligase HECTD3	UL74	ORF47
Q9P2J3	KLHL9	Kelch-like protein 9	IRS1	ORF16
Q8WWI1	LMO7	LIM domain only protein 7	US13, US26	ORF45
Q7L5Y9	MAEA	Macrophage erythroblast attacher	UL26	ORF21
Q9H871	RMND5A	Protein RMD5 homolog A	UL26	ORF21
Q9H4P4	RNF41	E3 ubiquitin-protein ligase NRDP1	US26	ORF60
Q15386	UBE3C	Ubiquitin-protein ligase E3C	UL16, UL18	ORF4
Q8IWV8	UBR2	E3 ubiquitin-protein ligase UBR2	UL150, UL19, UL80.5, US34, US8	K8_1
Q9H0M0	WWP1	NEDD4-like E3 ubiquitin-protein ligase WWP1	UL55, US30	ORF17_5
O00308	WWP2	NEDD4-like E3 ubiquitin-protein ligase WWP2	UL55, UL80.5, US30	ORF17_5
Q7Z7L7	ZER1	Protein zer-1 homolog	UL21A	K6
Viral process p=0.00827
O60885	BRD4	Bromodomain-containing protein 4	ORFL147C	ORF57
Q9H6F5	CCDC86	Coiled-coil domain-containing protein 86	RL6	ORF20
Q92793	CREBBP	CREB-binding protein	UL10, UL13, UL150A, UL17, UL2, UL26, UL27, UL30, UL31, UL86, US7	K9
Q9UER7	DAXX	Death domain-associated protein 6	UL82	ORF73
Q09472	EP300	Histone acetyltransferase p300	UL26, UL31	K9
P62993	GRB2	Growth factor receptor-bound protein 2	UL26	ORF39
P40189	IL6ST	Interleukin-6 receptor subunit beta	UL124, UL148A, UL20, US15, US7	K2
P52948	NUP98	Nuclear pore complex protein Nup98-Nup96	UL8	ORF10
Q96HA1	POM121	Nuclear envelope pore membrane protein POM 121	US26	K3
P78406	RAE1	mRNA export factor	UL8	ORF10
P11233	RALA	Ras-related protein Ral-A	UL130, UL140	K8_1
Q93009	USP7	Ubiquitin carboxyl-terminal hydrolase 7	UL83	ORF45
Long-term potentiation p=0.0113
Q92793	CREBBP	CREB-binding protein	UL10, UL13, UL150A, UL17, UL2, UL26, UL27, UL30, UL31, UL86, US7	K9
P35221	CTNNA1	Isoform 2 of Catenin alpha-1	US14	K14
Q09472	EP300	Histone acetyltransferase p300	UL26, UL31	K9
Q8WWI1	LMO7	LIM domain only protein 7	US13, US26	ORF45
P36897	TGFBR1	Isoform 2 of TGF-beta receptor type-1	UL20	K14
Q92558	WASF1	Wiskott-Aldrich syndrome protein family member 1	US7	K10
Ubl conjugation pathway p=0.0134
O95260	ATE1	Arginyl-tRNA--protein transferase 1	UL74	K8_1
Q13618	CUL3	Cullin-3	UL26	ORF16
Q5QP82	DCAF10	DDB1- and CUL4-associated factor 10	US18, US20	ORF38
Q86XK2	FBXO11	Isoform 5 of F-box only protein 11	UL104, UL80, UL80.5	K4_1
Q5T447	HECTD3	E3 ubiquitin-protein ligase HECTD3	UL74	ORF47
Q8N5Z5	KCTD17	BTB/POZ domain-containing protein KCTD17	UL86	ORF21
Q9P2J3	KLHL9	Kelch-like protein 9	IRS1	ORF16
O75592	MYCBP2	E3 ubiquitin-protein ligase MYCBP2	UL80.5	ORF10
Q9H4P4	RNF41	E3 ubiquitin-protein ligase NRDP1	US26	ORF60
Q15386	UBE3C	Ubiquitin-protein ligase E3C	UL16, UL18	ORF4
Q8IWV8	UBR2	E3 ubiquitin-protein ligase UBR2	UL150, UL19, UL80.5, US34, US8	K8_1
Q9UPU5	USP24	Ubiquitin carboxyl-terminal hydrolase 24	UL135, UL29, UL38, UL55, UL86, UL9, US7	ORF10
Q93009	USP7	Ubiquitin carboxyl-terminal hydrolase 7	UL83	ORF45
Q9H0M0	WWP1	NEDD4-like E3 ubiquitin-protein ligase WWP1	UL55, US30	ORF17_5
O00308	WWP2	NEDD4-like E3 ubiquitin-protein ligase WWP2	UL55, UL80.5, US30	ORF17_5
Q7Z7L7	ZER1	Protein zer-1 homolog	UL21A	K6
mRNA surveillance pathway p=0.0316
Q9P2I0	CPSF2	Cleavage and polyadenylation specificity factor subunit 2	UL26	ORF21
Q9UKF6	CPSF3	Cleavage and polyadenylation specificity factor subunit 3	UL26	ORF21
P63151	PPP2R2A	Isoform 2 of Serine/threonine-protein phosphatase 2A 55 kDa regulatory subunit B alpha isoform	UL17, UL71	ORF2
Q66LE6	PPP2R2D	Serine/threonine-protein phosphatase 2A 55 kDa regulatory subunit B delta isoform	UL17, UL71	ORF2
Q9BRP8	PYM1	Partner of Y14 and mago	ORFL147C, RL6, US9	K8ALPHA
O43148	RNMT	mRNA cap guanine-N7 methyltransferase	UL27, UL99	ORF10
Q9C0J8	WDR33	pre-mRNA 3' end processing protein WDR33	UL122, UL26, UL84, US26, US7	ORF21
Renal cell carcinoma p=0.0381
Q92793	CREBBP	CREB-binding protein	UL10, UL13, UL150A, UL17, UL2, UL26, UL27, UL30, UL31, UL86, US7	K9
P46108	CRK	Isoform Crk-I of Adapter molecule crk	IRS1, IRS1, US12	ORF39
Q09472	EP300	Histone acetyltransferase p300	UL26, UL31	K9
P62993	GRB2	Growth factor receptor-bound protein 2	UL26	ORF39
P36507	MAP2K2	Dual specificity mitogen-activated protein kinase kinase 2	RL6, UL14	K14
Q06124	PTPN11	Tyrosine-protein phosphatase non-receptor type 11	US12	ORF69
Adherens junction p=0.0409
Q92793	CREBBP	CREB-binding protein	UL10, UL13, UL150A, UL17, UL2, UL26, UL27, UL30, UL31, UL86, US7	K9
Q09472	EP300	Histone acetyltransferase p300	UL26, UL31	K9
P36507	MAP2K2	Dual specificity mitogen-activated protein kinase kinase 2	RL6, UL14	K14
P17612	PRKACA	cAMP-dependent protein kinase catalytic subunit alpha	UL14	ORF56
Q15418	RPS6KA1	Isoform 2 of Ribosomal protein S6 kinase alpha-1	UL26	ORF45
Q15349	RPS6KA2	Isoform 2 of Ribosomal protein S6 kinase alpha-2	UL26	ORF45
P51812	RPS6KA3	Ribosomal protein S6 kinase alpha-3	UL25, UL26	ORF45
Endoplasmic reticulum lumen p=0.0479
Q9UBS4	DNAJB11	DnaJ homolog subfamily B member 11	US9	K1
Q96AY3	FKBP10	Peptidyl-prolyl cis-trans isomerase FKBP10	ORFL147C	ORF27
Q14697	GANAB	Isoform 2 of Neutral alpha-glucosidase AB	UL14, UL14	K2
Q8TED1	GPX8	Probable glutathione peroxidase 8	UL20	ORF74
P14314	PRKCSH	Glucosidase 2 subunit beta	UL14	K2
Q14257	RCN2	Isoform 2 of Reticulocalbin-2	UL74	K1
Q9HCN8	SDF2L1	Stromal cell-derived factor 2-like protein 1	US9	K1
Q9NYU1	UGGT2	UDP-glucose:glycoprotein glucosyltransferase 2	UL130, UL40, UL74	ORF47

## Sheet: Supplementary File 7D
Term and associated Uniprot IDs	Gene Name	Description	Interacting baits (HCMV)
Mitochondrion p=0.0000000167
Q86Y39	NDUFA11	Isoform 2 of NADH dehydrogenase [ubiquinone] 1 alpha subcomplex subunit 11	UL40
Q8IXI1	RHOT2	Mitochondrial Rho GTPase 2	UL74
Q8IXI2	RHOT1	Isoform 3 of Mitochondrial Rho GTPase 1	UL40, UL47, UL74
Q5T9A4	ATAD3B	ATPase family AAA domain-containing protein 3B	US22
P82673	MRPS35	28S ribosomal protein S35, mitochondrial	UL44
P45954	ACADSB	Short/branched chain specific acyl-CoA dehydrogenase, mitochondrial	UL20, UL40
Q9HCC0	MCCC2	Methylcrotonoyl-CoA carboxylase beta chain, mitochondrial	UL8, US12
Q96EY7	PTCD3	Pentatricopeptide repeat domain-containing protein 3, mitochondrial	UL44
Q9UHV9	PFDN2	Prefoldin subunit 2	UL70
P54819	AK2	Adenylate kinase 2, mitochondrial	UL70
Q15070	OXA1L	Mitochondrial inner membrane protein OXA1L	UL40
Q9Y696	CLIC4	Chloride intracellular channel protein 4	UL71
P52789	HK2	Hexokinase-2	UL27, UL56
Q96I99	SUCLG2	Isoform 2 of Succinate--CoA ligase [GDP-forming] subunit beta, mitochondrial	UL16
P11498	PC	Pyruvate carboxylase, mitochondrial	UL27
Q96HS1	PGAM5	Serine/threonine-protein phosphatase PGAM5, mitochondrial	UL40
Q5T160	RARS2	Probable arginine--tRNA ligase, mitochondrial	UL20
P49753	ACOT2	Acyl-coenzyme A thioesterase 2, mitochondrial	UL122, UL14
Q92876	KLK6	Kallikrein-6	UL56, US23
Q9P0J1	PDP1	Isoform 2 of [Pyruvate dehydrogenase [acetyl-transferring]]-phosphatase 1, mitochondrial	UL80.5
O43837	IDH3B	Isocitrate dehydrogenase [NAD] subunit beta, mitochondrial	US12
Q5XKP0	MIC13	MICOS complex subunit MIC13	UL20, UL47
P23434	GCSH	Glycine cleavage system H protein, mitochondrial	RL6
Q92665	MRPS31	28S ribosomal protein S31, mitochondrial	UL44
Q9Y305	ACOT9	Isoform 4 of Acyl-coenzyme A thioesterase 9, mitochondrial	UL14
P04637	TP53	Cellular tumor antigen p53	UL29, UL38
Q9H3K2	GHITM	Growth hormone-inducible transmembrane protein	UL16
Q8NI60	COQ8A	Atypical kinase COQ8A, mitochondrial	UL139
P38117	ETFB	Isoform 2 of Electron transfer flavoprotein subunit beta	UL50
Q07812	BAX	Isoform Beta of Apoptosis regulator BAX	UL84
P10809	HSPD1	60 kDa heat shock protein, mitochondrial	UL70
P12694	BCKDHA	2-oxoisovalerate dehydrogenase subunit alpha, mitochondrial	UL38
Q9Y3B8	REXO2	Oligoribonuclease, mitochondrial	US8
Q9Y5J9	TIMM8B	Mitochondrial import inner membrane translocase subunit Tim8 B	UL104
Q9H936	SLC25A22	Mitochondrial glutamate carrier 1	UL20, UL4, UL40, US9
Q9NQP4	PFDN4	Prefoldin subunit 4	UL70
O60488	ACSL4	Long-chain-fatty-acid--CoA ligase 4	UL86
Q9BYN8	MRPS26	28S ribosomal protein S26, mitochondrial	UL44
Q9NX20	MRPL16	39S ribosomal protein L16, mitochondrial	UL135
Q96TA2	YME1L1	ATP-dependent zinc metalloprotease YME1L1	UL16, UL40, US30
Q8NCW5	NAXE	NAD(P)H-hydrate epimerase	US23
O95202	LETM1	LETM1 and EF-hand domain-containing protein 1, mitochondrial	UL135, US34A
Q9BYD2	MRPL9	39S ribosomal protein L9, mitochondrial	UL44
O75439	PMPCB	Mitochondrial-processing peptidase subunit beta	RL6, UL122, UL14, UL27, UL38
Q9Y2R5	MRPS17	28S ribosomal protein S17, mitochondrial	UL44
Q6UB35	MTHFD1L	Monofunctional C1-tetrahydrofolate synthase, mitochondrial	ORFL147C, RL6
Q96RQ3	MCCC1	Methylcrotonoyl-CoA carboxylase subunit alpha, mitochondrial	UL103
P05165	PCCA	Propionyl-CoA carboxylase alpha chain, mitochondrial	RL9A, UL102, UL50
Q9H078	CLPB	Caseinolytic peptidase B protein homolog	UL23, UL40
P51398	DAP3	28S ribosomal protein S29, mitochondrial	UL22A, UL30A, UL44
P05166	PCCB	Isoform 2 of Propionyl-CoA carboxylase beta chain, mitochondrial	UL50
O75746	SLC25A12	Calcium-binding mitochondrial carrier protein Aralar1	UL8
O76031	CLPX	ATP-dependent Clp protease ATP-binding subunit clpX-like, mitochondrial	UL33
O00165	HAX1	Isoform 2 of HCLS1-associated protein X-1	UL20, UL40, UL47, UL55, UL74, US9
P57105	SYNJ2BP	Synaptojanin-2-binding protein	UL147A, US30
Q16795	NDUFA9	NADH dehydrogenase [ubiquinone] 1 alpha subcomplex subunit 9, mitochondrial	US14
Q96D53	COQ8B	Atypical kinase COQ8B, mitochondrial	US9
Q9NTG7	SIRT3	NAD-dependent protein deacetylase sirtuin-3, mitochondrial	UL50
Q12849	GRSF1	G-rich sequence factor 1	UL44
P82914	MRPS15	28S ribosomal protein S15, mitochondrial	UL94, US22
O75489	NDUFS3	NADH dehydrogenase [ubiquinone] iron-sulfur protein 3, mitochondrial	UL8
O15294	OGT	UDP-N-acetylglucosamine--peptide N-acetylglucosaminyltransferase 110 kDa subunit	UL35, UL82
O60220	TIMM8A	Mitochondrial import inner membrane translocase subunit Tim8 A	UL104
P63167	DYNLL1	Dynein light chain 1, cytoplasmic	UL50
Q7L2E3	DHX30	Isoform 2 of Putative ATP-dependent RNA helicase DHX30	UL44
P20674	COX5A	Cytochrome c oxidase subunit 5A, mitochondrial	UL144
Q9Y5L4	TIMM13	Mitochondrial import inner membrane translocase subunit Tim13	UL104
O75600	GCAT	Isoform 2 of 2-amino-3-ketobutyrate coenzyme A ligase, mitochondrial	UL20
P04049	RAF1	Isoform 2 of RAF proto-oncogene serine/threonine-protein kinase	UL132
P12532	CKMT1A	Isoform 2 of Creatine kinase U-type, mitochondrial	UL56, UL56, US23
Q16718	NDUFA5	NADH dehydrogenase [ubiquinone] 1 alpha subcomplex subunit 5	UL122, UL99
O60333	KIF1B	Isoform 4 of Kinesin-like protein KIF1B	UL43, US12, US14
P82650	MRPS22	28S ribosomal protein S22, mitochondrial	UL22A, UL26, UL44
O75306	NDUFS2	NADH dehydrogenase [ubiquinone] iron-sulfur protein 2, mitochondrial	UL14
RNA-binding p=0.000000275
Q12906	ILF3	Interleukin enhancer-binding factor 3	UL112, UL150A, UL21A, US33A
Q9NWH9	SLTM	SAFB-like transcription modulator	RL6, UL30, US22, US26, US33A
O60306	AQR	Intron-binding protein aquarius	UL30
Q9Y2L1	DIS3	Exosome complex exonuclease RRP44	US12
Q9NX24	NHP2	H/ACA ribonucleoprotein complex subunit 2	UL44
O75494	SRSF10	Serine/arginine-rich splicing factor 10	RL6
Q9Y2R5	MRPS17	28S ribosomal protein S17, mitochondrial	UL44
Q9HCE1	MOV10	Putative helicase MOV-10	UL19, UL44, UL6, UL9
Q96KR1	ZFR	Zinc finger RNA-binding protein	UL150A, UL9
Q96P11	NSUN5	Isoform 4 of Probable 28S rRNA (cytosine-C(5))-methyltransferase	US22
Q96PK6	RBM14	RNA-binding protein 14	US22
P29558	RBMS1	Isoform 2 of RNA-binding motif, single-stranded-interacting protein 1	UL37
Q96EY7	PTCD3	Pentatricopeptide repeat domain-containing protein 3, mitochondrial	UL44
Q9P2K5	MYEF2	Myelin expression factor 2	UL44
Q15424	SAFB	Isoform 3 of Scaffold attachment factor B1	US22
Q9BZI7	UPF3B	Regulator of nonsense transcripts 3B	US9
Q9P2K8	EIF2AK4	eIF-2-alpha kinase GCN2	UL150A
Q01780	EXOSC10	Exosome component 10	UL9
O00148	DDX39A	ATP-dependent RNA helicase DDX39A	UL122, UL14, UL27
O43390	HNRNPR	Heterogeneous nuclear ribonucleoprotein R	UL8
Q96T37	RBM15	Putative RNA-binding protein 15	US22
Q13243	SRSF5	Serine/arginine-rich splicing factor 5	RL6, UL44
Q9UQ80	PA2G4	Proliferation-associated protein 2G4	UL56
Q13242	SRSF9	Serine/arginine-rich splicing factor 9	UL44
Q9UPY3	DICER1	Endoribonuclease Dicer	UL44
Q00839	HNRNPU	Heterogeneous nuclear ribonucleoprotein U	US22
Q15637	SF1	Isoform 5 of Splicing factor 1	US26
P08579	SNRPB2	U2 small nuclear ribonucleoprotein B''	UL9, US9
Q12849	GRSF1	G-rich sequence factor 1	UL44
Q9NR56	MBNL1	Muscleblind-like protein 1	ORFL147C, ORFS343C, UL47
Q10570	CPSF1	Cleavage and polyadenylation specificity factor subunit 1	UL26, UL8
Q5RKV6	EXOSC6	Exosome complex component MTR3	US13
P49756	RBM25	RNA-binding protein 25	US14
Q7L2E3	DHX30	Isoform 2 of Putative ATP-dependent RNA helicase DHX30	UL44
O75526	RBMXL2	RNA-binding motif protein, X-linked-like-2	US22
Q14151	SAFB2	Scaffold attachment factor B2	US22
Q9NZI8	IGF2BP1	Insulin-like growth factor 2 mRNA-binding protein 1	UL44
Q8IY67	RAVER1	Isoform 2 of Ribonucleoprotein PTB-binding 1	ORFL147C, UL72, UL9, US7
P46087	NOP2	Isoform 4 of Probable 28S rRNA (cytosine(4447)-C(5))-methyltransferase	UL44
Q9UKV3	ACIN1	Apoptotic chromatin condensation inducer in the nucleus	US19
P26599	PTBP1	Polypyrimidine tract-binding protein 1	ORFL147C
P09543	CNP	2',3'-cyclic-nucleotide 3'-phosphodiesterase	ORFL147C
Q08170	SRSF4	Serine/arginine-rich splicing factor 4	UL44
O75569	PRKRA	Interferon-inducible double-stranded RNA-dependent protein kinase activator A	UL44
Q9UKM9	RALY	RNA-binding protein Raly	UL10, UL56
Q53EL6	PDCD4	Programmed cell death protein 4	UL132, UL47
Q92879	CELF1	Isoform 4 of CUGBP Elav-like family member 1	ORFL147C
P18077	RPL35A	60S ribosomal protein L35a	UL44, UL6, US34A
P38159	RBMX	RNA-binding motif protein, X chromosome	US22
Q8NC51	SERBP1	Isoform 3 of Plasminogen activator inhibitor 1 RNA-binding protein	UL2, US9
Prefoldin complex p=0.000000798
Q9UHV9	PFDN2	Prefoldin subunit 2	UL70
P61758	VBP1	Prefoldin subunit 3	UL70
Q99471	PFDN5	Prefoldin subunit 5	UL102, UL114, UL122, UL2, UL70, UL99
O60925	PFDN1	Prefoldin subunit 1	UL70
Q9NUG6	PDRG1	p53 and DNA damage-regulated protein 1	UL80.5
Q9NQP4	PFDN4	Prefoldin subunit 4	UL70
O15212	PFDN6	Prefoldin subunit 6	RL12, UL2, UL56, UL70, UL80.5, US16
Nucleotide-binding p=0.00000141
P60604	UBE2G2	Ubiquitin-conjugating enzyme E2 G2	US14
Q3LXA3	TKFC	Triokinase/FMN cyclase	UL50
O75351	VPS4B	Vacuolar protein sorting-associated protein 4B	US14, US16
Q8IXI1	RHOT2	Mitochondrial Rho GTPase 2	UL74
B2RTY4	MYO9A	Isoform 4 of Unconventional myosin-IXa	UL20
Q9NYL2	ZAK	Mitogen-activated protein kinase kinase kinase MLT	US26
Q8IXI2	RHOT1	Isoform 3 of Mitochondrial Rho GTPase 1	UL40, UL47, UL74
Q5T9A4	ATAD3B	ATPase family AAA domain-containing protein 3B	US22
O95396	MOCS3	Adenylyltransferase and sulfurtransferase MOCS3	UL4
Q6PEY2	TUBA3E	Tubulin alpha-3E chain	UL138
P51532	SMARCA4	Transcription activator BRG1	US26
Q9H4M9	EHD1	EH domain-containing protein 1	ORFL147C
Q9HCC0	MCCC2	Methylcrotonoyl-CoA carboxylase beta chain, mitochondrial	UL8, US12
Q92620	DHX38	Pre-mRNA-splicing factor ATP-dependent RNA helicase PRP16	UL133, UL2, US26
P53350	PLK1	Serine/threonine-protein kinase PLK1	UL132
Q9HC98	NEK6	Isoform 2 of Serine/threonine-protein kinase Nek6	UL94
P54819	AK2	Adenylate kinase 2, mitochondrial	UL70
O00443	PIK3C2A	Phosphatidylinositol 4-phosphate 3-kinase C2 domain-containing subunit alpha	UL32
P52789	HK2	Hexokinase-2	UL27, UL56
Q9P2K8	EIF2AK4	eIF-2-alpha kinase GCN2	UL150A
O00148	DDX39A	ATP-dependent RNA helicase DDX39A	UL122, UL14, UL27
Q96I99	SUCLG2	Isoform 2 of Succinate--CoA ligase [GDP-forming] subunit beta, mitochondrial	UL16
Q00839	HNRNPU	Heterogeneous nuclear ribonucleoprotein U	US22
P11498	PC	Pyruvate carboxylase, mitochondrial	UL27
P68104	EEF1A1	Elongation factor 1-alpha 1	UL19
P04183	TK1	Thymidine kinase, cytosolic	US9
Q02880	TOP2B	DNA topoisomerase 2-beta	UL9
Q6P1M0	SLC27A4	Long-chain fatty acid transport protein 4	UL148C
Q5T160	RARS2	Probable arginine--tRNA ligase, mitochondrial	UL20
P23634	ATP2B4	Plasma membrane calcium-transporting ATPase 4	UL8
P49841	GSK3B	Isoform 2 of Glycogen synthase kinase-3 beta	RL6, UL80.5, US22
Q9UL25	RAB21	Ras-related protein Rab-21	RL6, UL100, UL148A, US27
Q9Y6R4	MAP3K4	Mitogen-activated protein kinase kinase kinase 4	UL94
Q562R1	ACTBL2	Beta-actin-like protein 2	UL138
P12882	MYH1	Myosin-1	US28
Q8NI60	COQ8A	Atypical kinase COQ8A, mitochondrial	UL139
P42356	PI4KA	Phosphatidylinositol 4-kinase alpha	UL132, UL16, UL20
P10809	HSPD1	60 kDa heat shock protein, mitochondrial	UL70
Q8NEB9	PIK3C3	Phosphatidylinositol 3-kinase catalytic subunit type 3	UL132, UL16, UL77
Q9NU22	MDN1	Midasin	UL75
O15067	PFAS	Phosphoribosylformylglycinamidine synthase	RL6
Q9HAN9	NMNAT1	Nicotinamide/nicotinic acid mononucleotide adenylyltransferase 1	UL131A
P84085	ARF5	ADP-ribosylation factor 5	UL40
O60488	ACSL4	Long-chain-fatty-acid--CoA ligase 4	UL86
Q9Y4B6	VPRBP	Protein VPRBP	UL35, US30
P62736	ACTA2	Actin, aortic smooth muscle	UL99, US9
P34931	HSPA1L	Heat shock 70 kDa protein 1-like	UL70
Q96TA2	YME1L1	ATP-dependent zinc metalloprotease YME1L1	UL16, UL40, US30
P11388	TOP2A	Isoform 4 of DNA topoisomerase 2-alpha	RL6, RL8A, UL105, UL150A, UL19, UL20, UL30, UL32, UL86, UL9
Q8WZ42	TTN	Isoform 12 of Titin	UL55, US28
Q8NCW5	NAXE	NAD(P)H-hydrate epimerase	US23
Q14978	NOLC1	Isoform 3 of Nucleolar and coiled-body phosphoprotein 1	UL86, US7
Q12756	KIF1A	Isoform 2 of Kinesin-like protein KIF1A	UL89
P49336	CDK8	Cyclin-dependent kinase 8	UL50
Q9HCE1	MOV10	Putative helicase MOV-10	UL19, UL44, UL6, UL9
P52429	DGKE	Diacylglycerol kinase epsilon	US14
P68400	CSNK2A1	Casein kinase II subunit alpha	UL84
O14966	RAB29	Ras-related protein Rab-7L1	UL40, US27
Q6UB35	MTHFD1L	Monofunctional C1-tetrahydrofolate synthase, mitochondrial	ORFL147C, RL6
Q96RQ3	MCCC1	Methylcrotonoyl-CoA carboxylase subunit alpha, mitochondrial	UL103
O95819	MAP4K4	Isoform 3 of Mitogen-activated protein kinase kinase kinase kinase 4	ORFS343C
P11908	PRPS2	Isoform 2 of Ribose-phosphate pyrophosphokinase 2	US12
P05165	PCCA	Propionyl-CoA carboxylase alpha chain, mitochondrial	RL9A, UL102, UL50
Q9H078	CLPB	Caseinolytic peptidase B protein homolog	UL23, UL40
P05166	PCCB	Isoform 2 of Propionyl-CoA carboxylase beta chain, mitochondrial	UL50
Q8WVC6	DCAKD	Dephospho-CoA kinase domain-containing protein	UL148C
P51617	IRAK1	Interleukin-1 receptor-associated kinase 1	UL19, UL20, US9
P48643	CCT5	T-complex protein 1 subunit epsilon	UL70
P49674	CSNK1E	Casein kinase I isoform epsilon	UL148D
P51858	HDGF	Hepatoma-derived growth factor	UL45
O76031	CLPX	ATP-dependent Clp protease ATP-binding subunit clpX-like, mitochondrial	UL33
Q8NHH9	ATL2	Atlastin-2	UL148C
P20340	RAB6A	Isoform 2 of Ras-related protein Rab-6A	UL100, UL13, UL148A, UL40, US27, US28
Q9UPY3	DICER1	Endoribonuclease Dicer	UL44
P49840	GSK3A	Glycogen synthase kinase-3 alpha	UL80.5, US22
P55072	VCP	Transitional endoplasmic reticulum ATPase	US30
P17066	HSPA6	Heat shock 70 kDa protein 6	UL70
Q96D53	COQ8B	Atypical kinase COQ8B, mitochondrial	US9
P98194	ATP2C1	Isoform 7 of Calcium-transporting ATPase type 2C member 1	UL8, US27
P48723	HSPA13	Heat shock 70 kDa protein 13	UL20
Q7L2E3	DHX30	Isoform 2 of Putative ATP-dependent RNA helicase DHX30	UL44
P48729	CSNK1A1	Isoform 2 of Casein kinase I isoform alpha	UL56
Q9HD20	ATP13A1	Manganese-transporting ATPase 13A1	UL148C, US13, US21
P27448	MARK3	Isoform 6 of MAP/microtubule affinity-regulating kinase 3	UL82
Q02241	KIF23	Kinesin-like protein KIF23	UL20, US26
P04049	RAF1	Isoform 2 of RAF proto-oncogene serine/threonine-protein kinase	UL132
P12532	CKMT1A	Isoform 2 of Creatine kinase U-type, mitochondrial	UL56, UL56, US23
Q03468	ERCC6	DNA excision repair protein ERCC-6	ORFL147C, RL8A, UL38, UL80.5, UL9
Q15645	TRIP13	Pachytene checkpoint protein 2 homolog	UL20, US9
P10301	RRAS	Ras-related protein R-Ras	UL14, UL8
O60333	KIF1B	Isoform 4 of Kinesin-like protein KIF1B	UL43, US12, US14
P11055	MYH3	Myosin-3	US28
O14730	RIOK3	Serine/threonine-protein kinase RIO3	UL40
Q5HYI8	RABL3	Rab-like protein 3	UL75
Q9Y623	MYH4	Myosin-4	US28
14-3-3 protein p=0.0000459
P27348	YWHAQ	14-3-3 protein theta	UL43
P62258	YWHAE	14-3-3 protein epsilon	UL43
Q04917	YWHAH	14-3-3 protein eta	UL43
P31946	YWHAB	14-3-3 protein beta/alpha	UL43
P61981	YWHAG	14-3-3 protein gamma	UL43
P63104	YWHAZ	14-3-3 protein zeta/delta	UL43
Ribonucleoprotein p=0.0000759
Q9NX20	MRPL16	39S ribosomal protein L16, mitochondrial	UL135
Q9NX24	NHP2	H/ACA ribonucleoprotein complex subunit 2	UL44
Q9BYD2	MRPL9	39S ribosomal protein L9, mitochondrial	UL44
Q9Y2R5	MRPS17	28S ribosomal protein S17, mitochondrial	UL44
P27635	RPL10	60S ribosomal protein L10	US22
P61353	RPL27	60S ribosomal protein L27	UL44
Q9H583	HEATR1	HEAT repeat-containing protein 1	US9
P82673	MRPS35	28S ribosomal protein S35, mitochondrial	UL44
Q969Q0	RPL36AL	60S ribosomal protein L36a-like	UL44
P51398	DAP3	28S ribosomal protein S29, mitochondrial	UL22A, UL30A, UL44
P84098	RPL19	60S ribosomal protein L19	UL44
O43390	HNRNPR	Heterogeneous nuclear ribonucleoprotein R	UL8
Q9UQ80	PA2G4	Proliferation-associated protein 2G4	UL56
Q00839	HNRNPU	Heterogeneous nuclear ribonucleoprotein U	US22
P08579	SNRPB2	U2 small nuclear ribonucleoprotein B''	UL9, US9
P82914	MRPS15	28S ribosomal protein S15, mitochondrial	UL94, US22
Q9Y2X3	NOP58	Nucleolar protein 58	UL132
Q96L21	RPL10L	60S ribosomal protein L10-like	US22
O75526	RBMXL2	RNA-binding motif protein, X-linked-like-2	US22
Q92665	MRPS31	28S ribosomal protein S31, mitochondrial	UL44
Q9UKM9	RALY	RNA-binding protein Raly	UL10, UL56
P82650	MRPS22	28S ribosomal protein S22, mitochondrial	UL22A, UL26, UL44
P18077	RPL35A	60S ribosomal protein L35a	UL44, UL6, US34A
Q9Y3U8	RPL36	60S ribosomal protein L36	UL44
Q9BYN8	MRPS26	28S ribosomal protein S26, mitochondrial	UL44
P38159	RBMX	RNA-binding motif protein, X chromosome	US22
VCP-NPL4-UFD1 AAA ATPase complex p=0.00022
Q9BUN8	DERL1	Derlin-1	UL148A
Q04323	UBXN1	Isoform 2 of UBX domain-containing protein 1	RL6
Q96CS3	FAF2	FAS-associated factor 2	US30
Q8TAT6	NPLOC4	Isoform 2 of Nuclear protein localization protein 4 homolog	US30
Q92890	UFD1L	Isoform Long of Ubiquitin fusion degradation protein 1 homolog	US30
P55072	VCP	Transitional endoplasmic reticulum ATPase	US30
Cell cycle p=0.000669
Q96T88	UHRF1	Isoform 2 of E3 ubiquitin-protein ligase UHRF1	RL6
O75351	VPS4B	Vacuolar protein sorting-associated protein 4B	US14, US16
Q9Y3P9	RABGAP1	Rab GTPase-activating protein 1	UL100, UL132, US13, US27
Q15003	NCAPH	Condensin complex subunit 2	UL132, UL19, UL9
Q9NYL2	ZAK	Mitogen-activated protein kinase kinase kinase MLT	US26
Q5T9A4	ATAD3B	ATPase family AAA domain-containing protein 3B	US22
Q9NNW5	WDR6	WD repeat-containing protein 6	UL150A, UL26, UL29, UL80.5, UL9, US1
Q8NFH4	NUP37	Nucleoporin Nup37	UL26, UL50
Q9BXS6	NUSAP1	Nucleolar and spindle-associated protein 1	UL82
P68400	CSNK2A1	Casein kinase II subunit alpha	UL84
P53350	PLK1	Serine/threonine-protein kinase PLK1	UL132
Q8WV41	SNX33	Sorting nexin-33	UL82
P46736	BRCC3	Lys-63-specific deubiquitinase BRCC36	US26
Q09028	RBBP4	Histone-binding protein RBBP4	US12, US14
P61289	PSME3	Isoform 2 of Proteasome activator complex subunit 3	UL27, UL33
Q9HC98	NEK6	Isoform 2 of Serine/threonine-protein kinase Nek6	UL94
Q9P2K8	EIF2AK4	eIF-2-alpha kinase GCN2	UL150A
Q7Z5K2	WAPL	Isoform 3 of Wings apart-like protein homolog	RL8A, UL74, UL94, US9
Q13564	NAE1	NEDD8-activating enzyme E1 regulatory subunit	ORFS343C, UL27
Q9BPX3	NCAPG	Condensin complex subunit 3	UL16
Q53EZ4	CEP55	Centrosomal protein of 55 kDa	UL80.5
Q12824	SMARCB1	Isoform B of SWI/SNF-related matrix-associated actin-dependent regulator of chromatin subfamily B member 1	UL99
Q15018	FAM175B	BRISC complex subunit Abro1	US26
Q29RF7	PDS5A	Sister chromatid cohesion protein PDS5 homolog A	UL16
O75909	CCNK	Isoform 4 of Cyclin-K	UL150A
P18754	RCC1	Isoform 2 of Regulator of chromosome condensation	ORFL147C, RL6, UL132
Q9UNS1	TIMELESS	Protein timeless homolog	UL16
P52926	HMGA2	High mobility group protein HMGI-C	RL6, UL132
P48729	CSNK1A1	Isoform 2 of Casein kinase I isoform alpha	UL56
Q14676	MDC1	Mediator of DNA damage checkpoint protein 1	RL6, UL132, UL150A
Q8N3U4	STAG2	Isoform 2 of Cohesin subunit SA-2	UL135, US7
Q02241	KIF23	Kinesin-like protein KIF23	UL20, US26
P04637	TP53	Cellular tumor antigen p53	UL29, UL38
Q15021	NCAPD2	Condensin complex subunit 1	UL132, UL150A, UL19, UL20, UL86, UL9
Q13620	CUL4B	Cullin-4B	RL1, UL19, UL19
Q9BTE3	MCMBP	Mini-chromosome maintenance complex-binding protein	UL140, UL47
Q8NEB9	PIK3C3	Phosphatidylinositol 3-kinase catalytic subunit type 3	UL132, UL16, UL77
Q13112	CHAF1B	Chromatin assembly factor 1 subunit B	UL9
Q8WYP5	AHCTF1	Isoform 2 of Protein ELYS	UL132, UL30, UL9
Q8NBT2	SPC24	Kinetochore protein Spc24	UL47
mRNA splicing p=0.000751
P08579	SNRPB2	U2 small nuclear ribonucleoprotein B''	UL9, US9
Q09161	NCBP1	Nuclear cap-binding protein subunit 1	UL130
Q9NR56	MBNL1	Muscleblind-like protein 1	ORFL147C, ORFS343C, UL47
O60306	AQR	Intron-binding protein aquarius	UL30
Q5BKZ1	ZNF326	DBIRD complex subunit ZNF326	UL131A, US22
P49756	RBM25	RNA-binding protein 25	US14
O75494	SRSF10	Serine/arginine-rich splicing factor 10	RL6
Q9ULX6	AKAP8L	A-kinase anchor protein 8-like	US22
P57678	GEMIN4	Gem-associated protein 4	UL16
Q92620	DHX38	Pre-mRNA-splicing factor ATP-dependent RNA helicase PRP16	UL133, UL2, US26
P26599	PTBP1	Polypyrimidine tract-binding protein 1	ORFL147C
Q9UKV3	ACIN1	Apoptotic chromatin condensation inducer in the nucleus	US19
Q08170	SRSF4	Serine/arginine-rich splicing factor 4	UL44
Q9UKM9	RALY	RNA-binding protein Raly	UL10, UL56
Q13243	SRSF5	Serine/arginine-rich splicing factor 5	RL6, UL44
O00148	DDX39A	ATP-dependent RNA helicase DDX39A	UL122, UL14, UL27
O43390	HNRNPR	Heterogeneous nuclear ribonucleoprotein R	UL8
Q13242	SRSF9	Serine/arginine-rich splicing factor 9	UL44
Q92879	CELF1	Isoform 4 of CUGBP Elav-like family member 1	ORFL147C
Q15637	SF1	Isoform 5 of Splicing factor 1	US26
Q00839	HNRNPU	Heterogeneous nuclear ribonucleoprotein U	US22
P38159	RBMX	RNA-binding motif protein, X chromosome	US22
Lipid biosynthesis p=0.00114
P11498	PC	Pyruvate carboxylase, mitochondrial	UL27
Q96K12	FAR2	Fatty acyl-CoA reductase 2	UL71
Q9BW60	ELOVL1	Elongation of very long chain fatty acids protein 1	UL100, US21
Q16850	CYP51A1	Lanosterol 14-alpha demethylase	UL30
Q92604	LPGAT1	Acyl-CoA:lysophosphatidylglycerol acyltransferase 1	US12
Q9NPH2	ISYNA1	Inositol-3-phosphate synthase 1	US12
Q8WVX9	FAR1	Fatty acyl-CoA reductase 1	UL16, UL40
Q9BVG9	PTDSS2	Phosphatidylserine synthase 2	UL16
P48651	PTDSS1	Phosphatidylserine synthase 1	UL132, UL148A, UL40
P04035	HMGCR	Isoform 3 of 3-hydroxy-3-methylglutaryl-coenzyme A reductase	UL148C
Q643R3	LPCAT4	Lysophospholipid acyltransferase LPCAT4	UL20
Q9UHQ9	CYB5R1	NADH-cytochrome b5 reductase 1	US14
Q8NBQ5	HSD17B11	Estradiol 17-beta-dehydrogenase 11	UL71
Q9NRX5	SERINC1	Serine incorporator 1	US3
Q13907	IDI1	Isoform 2 of Isopentenyl-diphosphate Delta-isomerase 1	UL13, UL27
Q15800	MSMO1	Methylsterol monooxygenase 1	UL148A
Mitotic chromosome condensation p=0.00249
Q9BPX3	NCAPG	Condensin complex subunit 3	UL16
Q15021	NCAPD2	Condensin complex subunit 1	UL132, UL150A, UL19, UL20, UL86, UL9
Q8WZ42	TTN	Isoform 12 of Titin	UL55, US28
Q15003	NCAPH	Condensin complex subunit 2	UL132, UL19, UL9
O43823	AKAP8	A-kinase anchor protein 8	US22
Q9BXS6	NUSAP1	Nucleolar and spindle-associated protein 1	UL82
Q9ULX6	AKAP8L	A-kinase anchor protein 8-like	US22
Cell-cell adherens junction p=0.00267
P19022	CDH2	Cadherin-2	UL8, US12
O14908	GIPC1	PDZ domain-containing protein GIPC1	UL2, UL23
Q9H444	CHMP4B	Charged multivesicular body protein 4b	UL33
P31946	YWHAB	14-3-3 protein beta/alpha	UL43
P35222	CTNNB1	Catenin beta-1	UL8
Q9H4M9	EHD1	EH domain-containing protein 1	ORFL147C
P46109	CRKL	Crk-like protein	IRS1, RL6, UL2, UL47, UL57
P08195	SLC3A2	Isoform 4 of 4F2 cell-surface antigen heavy chain	UL148A
O95817	BAG3	BAG family molecular chaperone regulator 3	UL70
P31949	S100A11	Protein S100-A11	US23
P63104	YWHAZ	14-3-3 protein zeta/delta	UL43
P42566	EPS15	Epidermal growth factor receptor substrate 15	UL94
Q02487	DSC2	Desmocollin-2	UL56, US23
Q8IYB1	MB21D2	Protein MB21D2	UL100, US12
Q8IZP0	ABI1	Isoform 9 of Abl interactor 1	UL135, UL50, US19
O15020	SPTBN2	Spectrin beta chain, non-erythrocytic 2	UL56
Q92522	H1FX	Histone H1x	UL44
Q99961	SH3GL1	Endophilin-A2	IRS1
P28072	PSMB6	Proteasome subunit beta type-6	UL27
P42356	PI4KA	Phosphatidylinositol 4-kinase alpha	UL132, UL16, UL20
P62258	YWHAE	14-3-3 protein epsilon	UL43
P53365	ARFIP2	Arfaptin-2	US19
O76021	RSL1D1	Ribosomal L1 domain-containing protein 1	RL6, UL9
A0FGR8	ESYT2	Isoform 6 of Extended synaptotagmin-2	UL147A
Q8NC51	SERBP1	Isoform 3 of Plasminogen activator inhibitor 1 RNA-binding protein	UL2, US9
O60645	EXOC3	Exocyst complex component 3	UL32
Mitochondrial small ribosomal subunit p=0.00427
P51398	DAP3	28S ribosomal protein S29, mitochondrial	UL22A, UL30A, UL44
P82914	MRPS15	28S ribosomal protein S15, mitochondrial	UL94, US22
P82650	MRPS22	28S ribosomal protein S22, mitochondrial	UL22A, UL26, UL44
Q9Y2R5	MRPS17	28S ribosomal protein S17, mitochondrial	UL44
Q92665	MRPS31	28S ribosomal protein S31, mitochondrial	UL44
P82673	MRPS35	28S ribosomal protein S35, mitochondrial	UL44
Q9BYN8	MRPS26	28S ribosomal protein S26, mitochondrial	UL44
WD repeat p=0.00458
Q9H2Y7	ZNF106	Zinc finger protein 106	US26
O75530	EED	Isoform 2 of Polycomb protein EED	UL9
Q15751	HERC1	Probable E3 ubiquitin-protein ligase HERC1	US34A
Q09019	DMWD	Dystrophia myotonica WD repeat-containing protein	UL138
Q9NNW5	WDR6	WD repeat-containing protein 6	UL150A, UL26, UL29, UL80.5, UL9, US1
Q8NFH4	NUP37	Nucleoporin Nup37	UL26, UL50
O76071	CIAO1	Probable cytosolic iron-sulfur protein assembly protein CIAO1	UL16, UL23, US9
Q8TAF3	WDR48	WD repeat-containing protein 48	UL138
Q9H6U6	BCAS3	Isoform 4 of Breast carcinoma-amplified sequence 3	UL50
Q13610	PWP1	Periodic tryptophan protein 1 homolog	UL44
Q13409	DYNC1I2	Isoform 2E of Cytoplasmic dynein 1 intermediate chain 2	US8
Q09028	RBBP4	Histone-binding protein RBBP4	US12, US14
Q9NRL3	STRN4	Isoform 3 of Striatin-4	US9
Q14137	BOP1	Ribosome biogenesis protein BOP1	UL132, US34A, US7
Q9BZK7	TBL1XR1	F-box-like/WD repeat-containing protein TBL1XR1	UL29
Q9NXC5	MIOS	WD repeat-containing protein mio	ORFL147C, UL94
Q9NRG9	AAAS	Aladin	UL132
Q6IA86	ELP2	Isoform 6 of Elongator complex protein 2	ORFL147C
Q13112	CHAF1B	Chromatin assembly factor 1 subunit B	UL9
Q9GZL7	WDR12	Ribosome biogenesis protein WDR12	ORFS343C
Q9Y4B6	VPRBP	Protein VPRBP	UL35, US30
SAP domain p=0.00463
P35659	DEK	Protein DEK	RL6, US7
Q9NWH9	SLTM	SAFB-like transcription modulator	RL6, UL30, US22, US26, US33A
Q15424	SAFB	Isoform 3 of Scaffold attachment factor B1	US22
Q9UKV3	ACIN1	Apoptotic chromatin condensation inducer in the nucleus	US19
Q1KMD3	HNRNPUL2	Heterogeneous nuclear ribonucleoprotein U-like protein 2	US22
Q14151	SAFB2	Scaffold attachment factor B2	US22
Q00839	HNRNPU	Heterogeneous nuclear ribonucleoprotein U	US22
