# Supplementary figures and images for: Human cytomegalovirus interactome analysis identifies degradation hubs, domain associations and viral protein functions
Source: eLife journal article supplement (doi:10.7554/elife.49894), 2019-12-24

**Figure 4 – Figure Supplement 1**

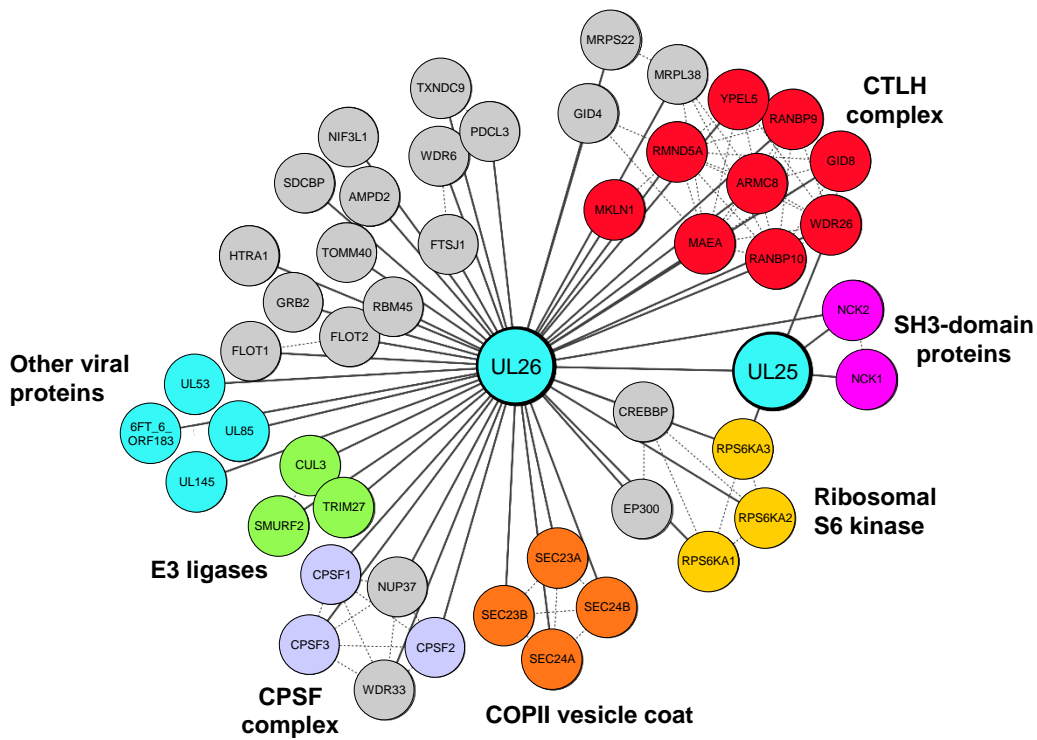

Supplement: supp [file elife-49894-supp-v1.zip]

## Figure 5 – Figure Supplement 1

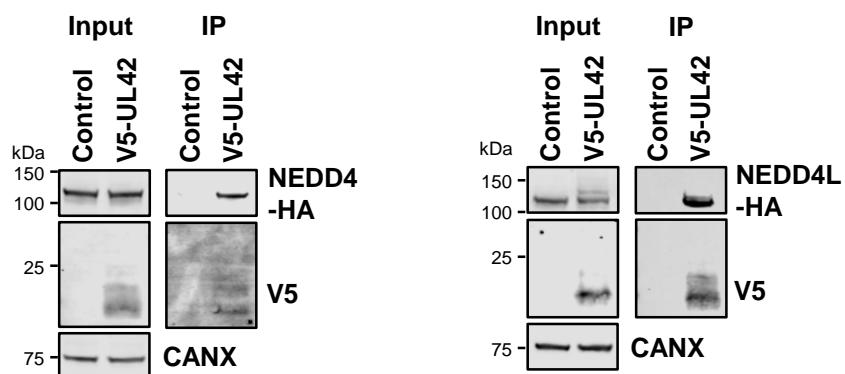

Supplement: supp [file elife-49894-supp-v1.zip]

# Figure 1 – Figure Supplement 1

**A**

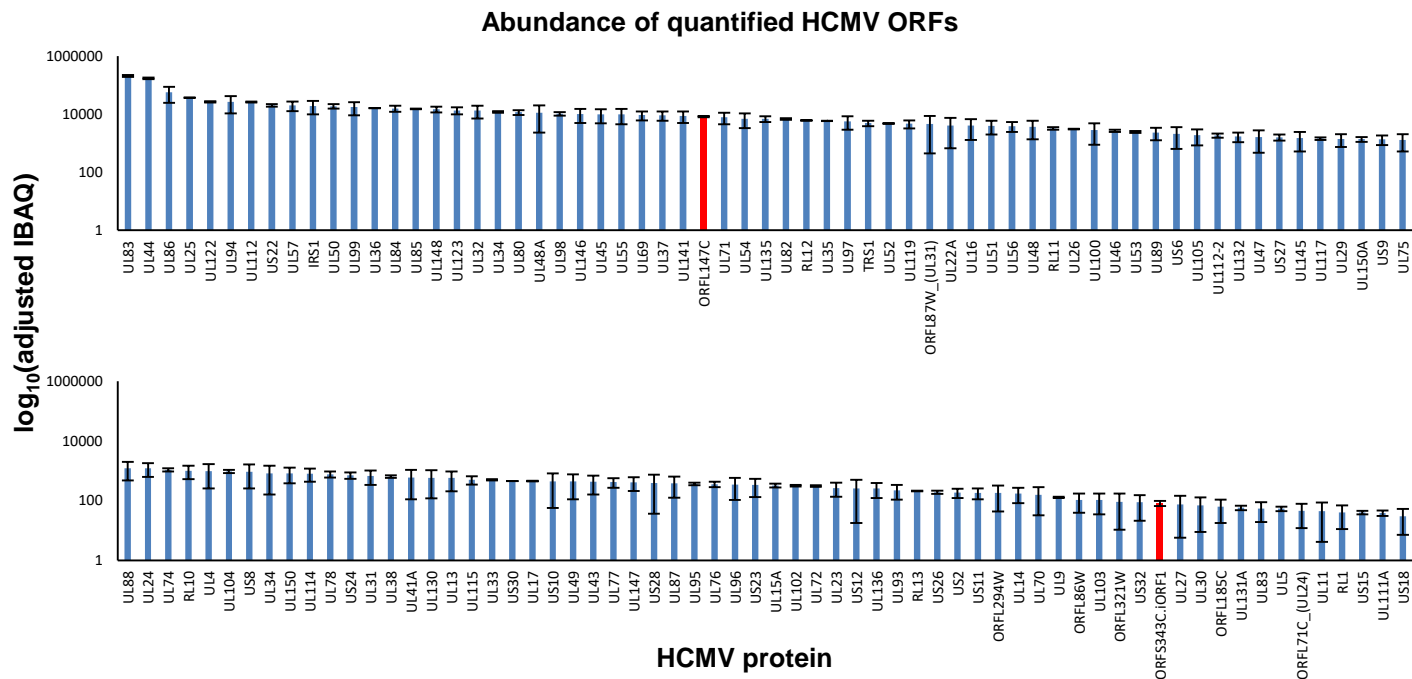

**B**

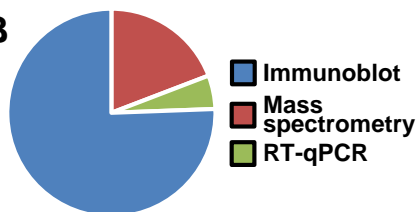

**C**

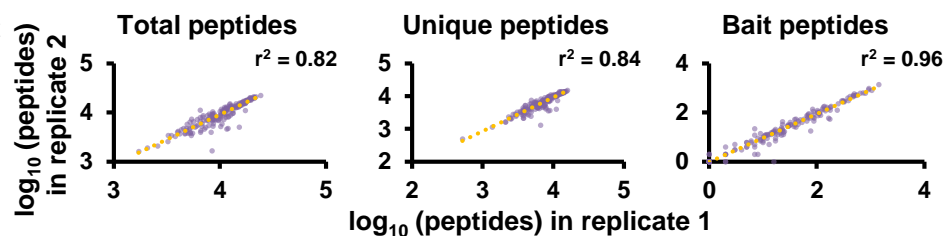

**D**

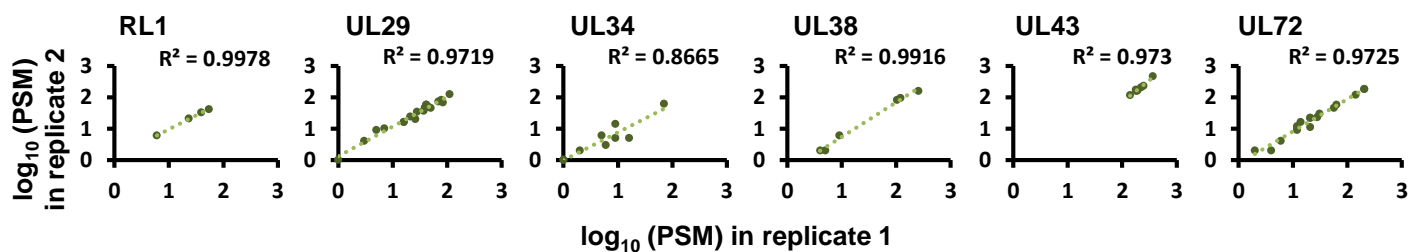

**E**

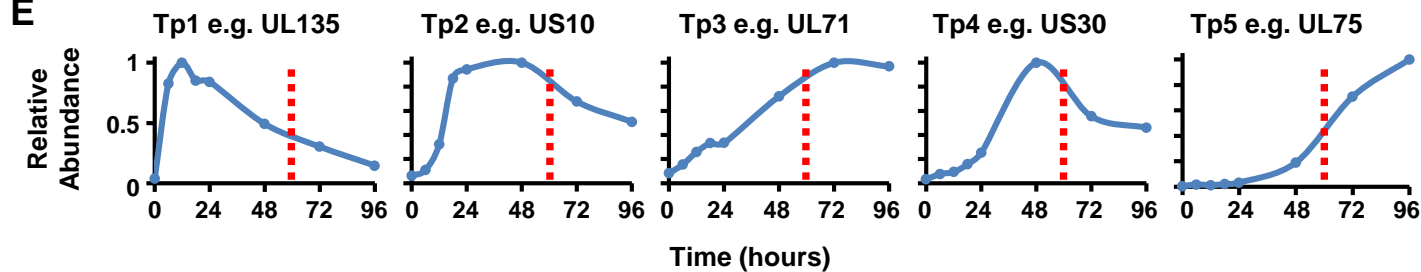

Supplement: supp [file elife-49894-supp-v1.zip]

Figure 2 – Figure Supplement 2

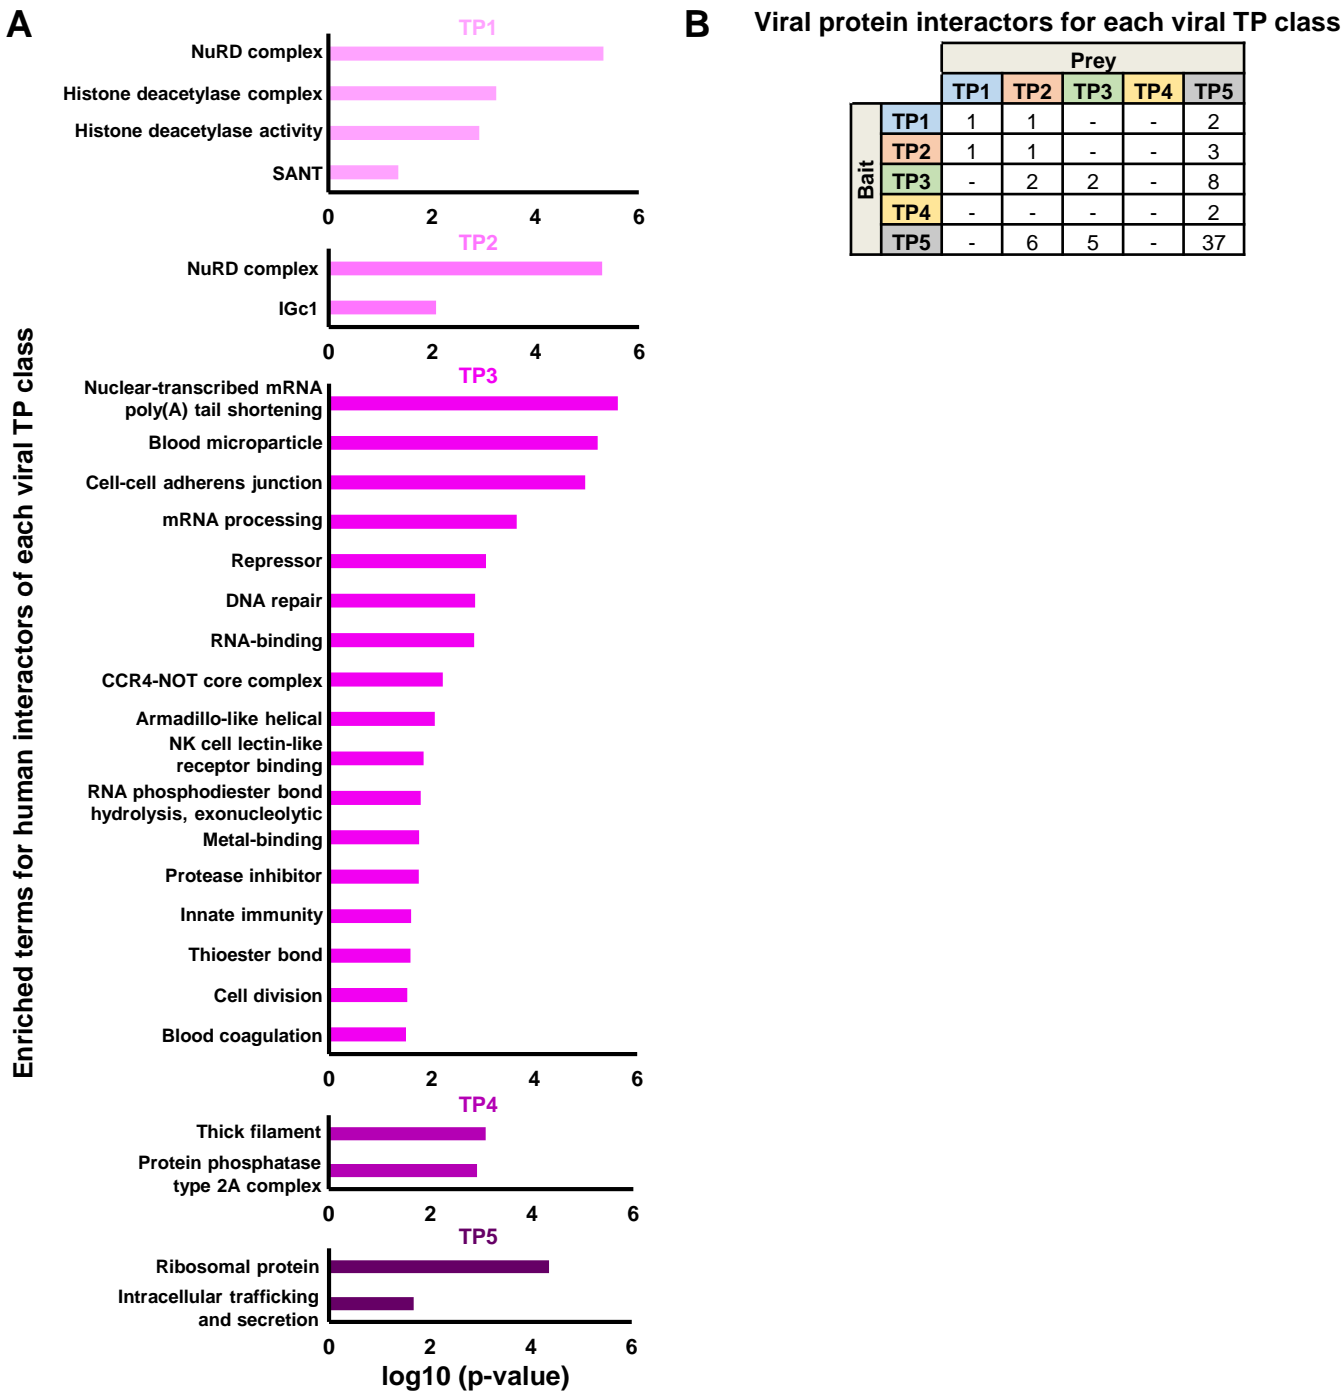

Supplement: supp [file elife-49894-supp-v1.zip]

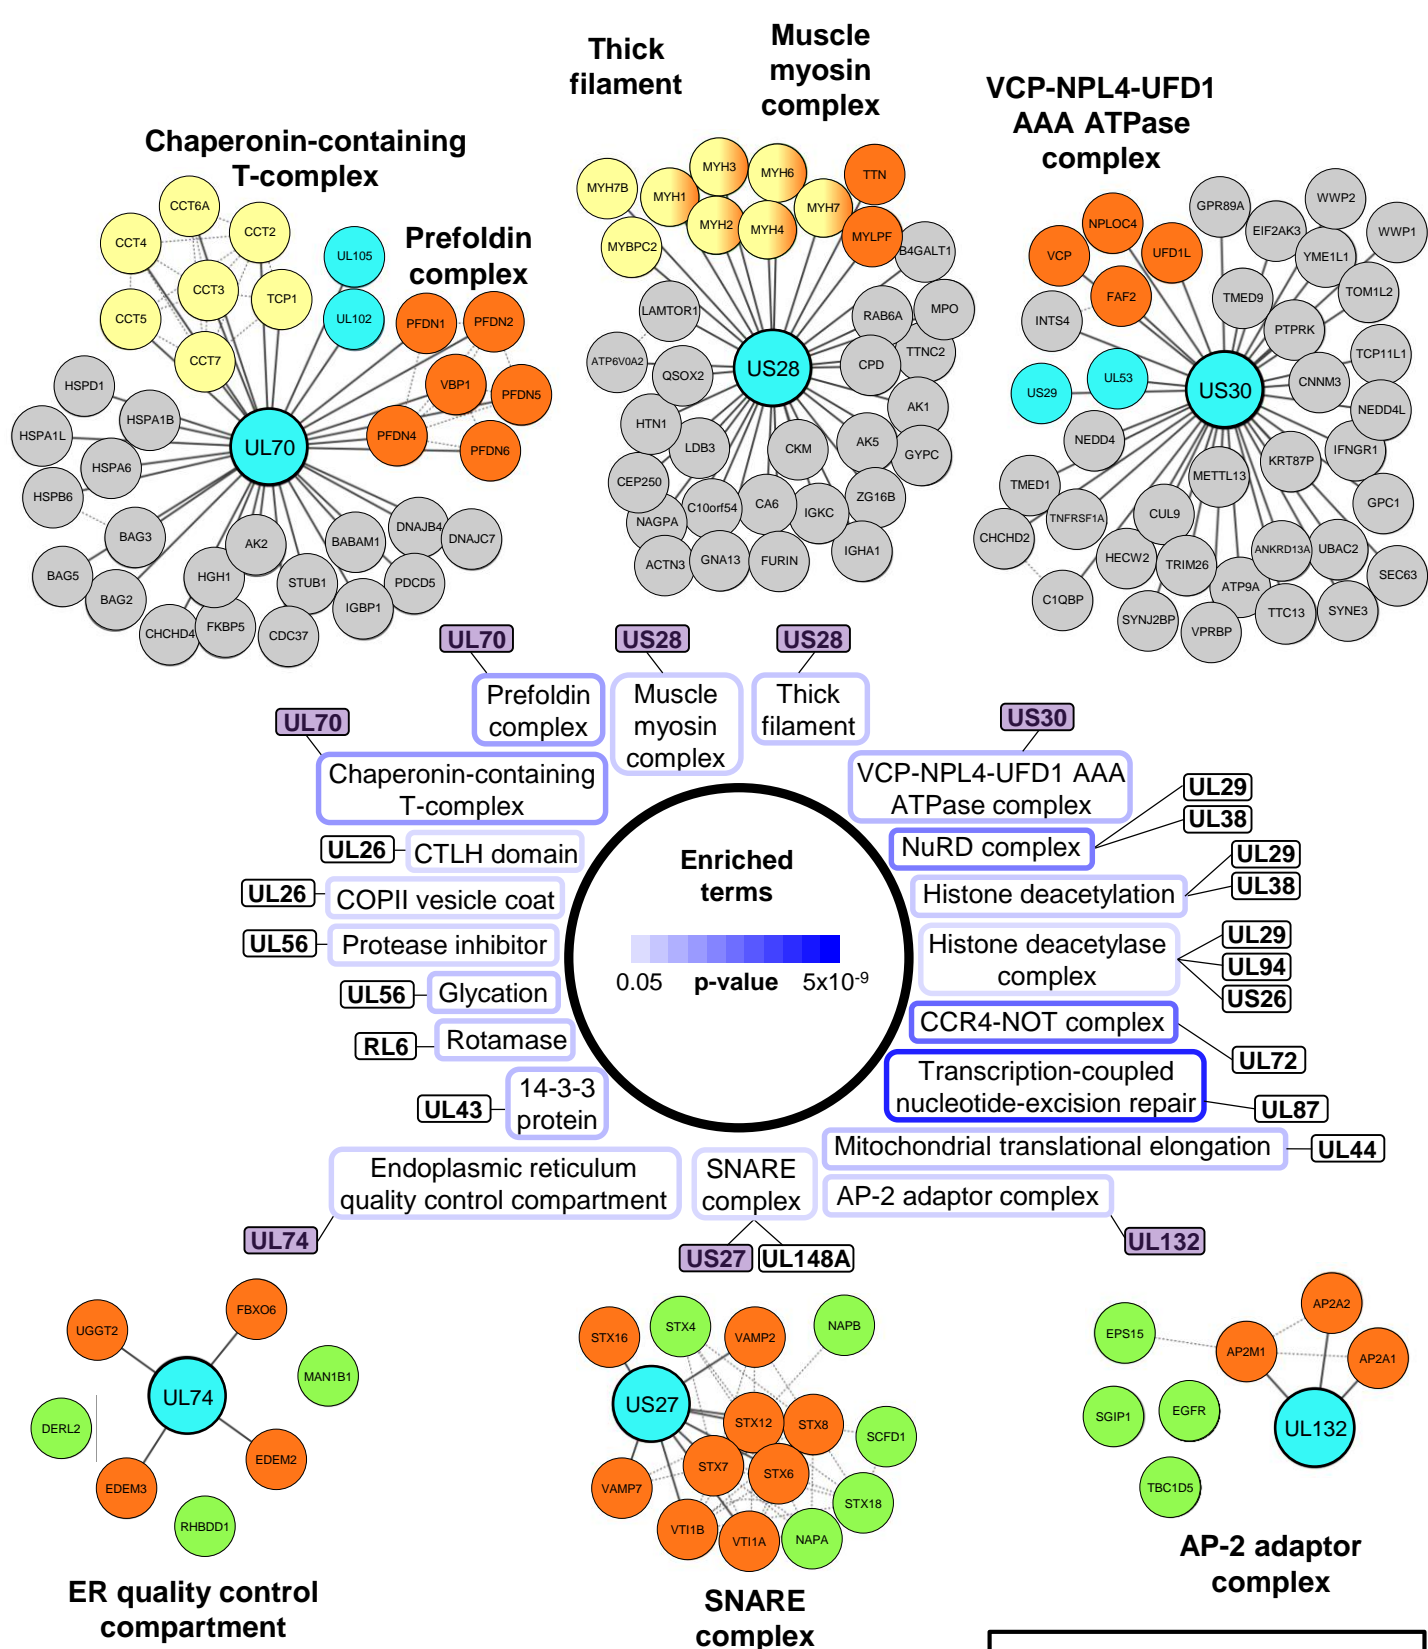

**Figure 2 – Figure Supplement 1**

Supplement: supp [file elife-49894-supp-v1.zip]

Figure 1 – Figure Supplement 2

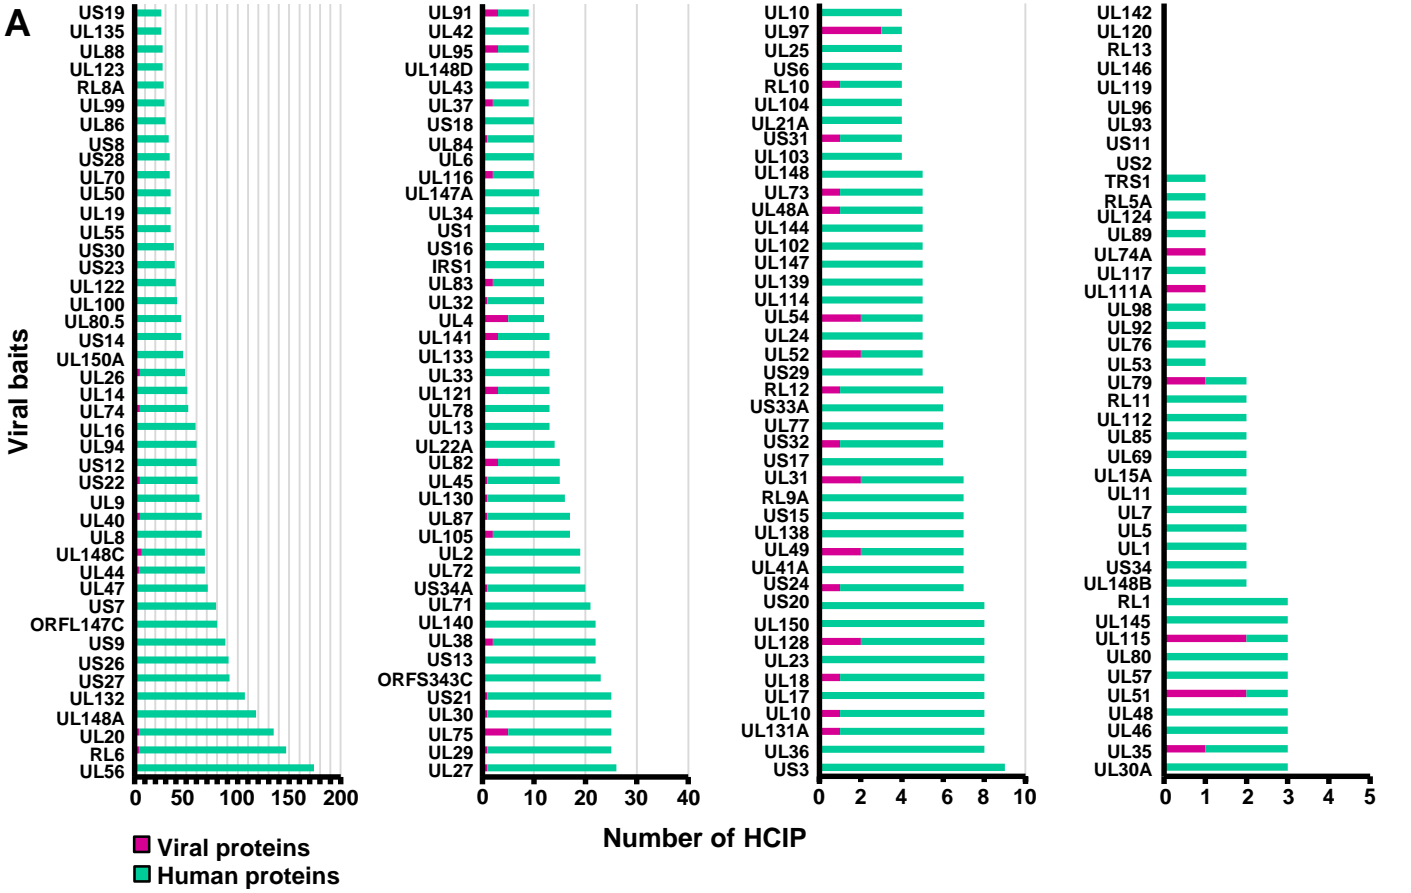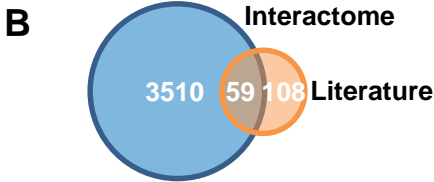

Supplement: supp [file elife-49894-supp-v1.zip]
